# Supplementary material for: Freshwater pearl mussels from northern Sweden serve as long-term, high-resolution stream water isotope recorders
Source: Copernicus journal article supplement (doi:10.5194/hess-24-673-2020), 2020-02-17
Supplement: Supplementary file 1 [file hess-24-673-2020-supplement.zip]

Archive with 3 entries (3 files):
- hess-24-673-2020-supplement-title-page.pdf
- Supplementary data.xlsx
- Calculations.xlsx
