# Supplementary material for: Freshwater pearl mussels from northern Sweden serve as long-term, high-resolution stream water isotope recorders
Source: Copernicus journal article supplement (doi:10.5194/hess-24-673-2020), 2020-02-17
Supplement: Supplementary file 1 [file hess-24-673-2020-supplement.zip › Calculations.xlsx]

## Sheet: Daily shell growth
#day	cumul time (%) passed	… at date	daily incr width µm	daily inc (%)	cumul proportion of ann incr (%)					don't modify any numbers here… only further below at weights (yellow fields)										Proportion of month in…			sample 1							2							3							4
1	0.699301	1992-05-23	1.40351	0.747017	0.747017				# samples per annual increment (equidistant sampling intervals)												Check		M	J	J	A	S	O		M	J	J	A	S	O		M	J	J	A	S	O		M	J	J	A	S	O
2	1.3986	1992-05-24	1.28655	0.684765	1.43178				1	23May-12Oct										1	100		6.28739	25.4919	24.5165	21.9243	16.8801	4.89981
3	2.0979	1992-05-25	1.40351	0.747017	2.1788				2	23May-22Jul-12Oct										2	100		6.28739	25.4919	17.967							6.54947	21.9243	16.8801	4.89981
4	2.7972	1992-05-26	1.40351	0.747017	2.92582				3	23May-1Jul-15Aug-12Oct										3	100		6.28739	25.4919	1.18464							23.3318	10.3344							11.59	16.8801	4.89981
5	3.4965	1992-05-27	1.40351	0.747017	3.67283				4	23May-23Jun-22Jul-26Aug-12Oct										4	100		6.28739	18.6281							6.86384	17.967							6.54947	18.5217							3.40266	16.8801	4.89981
6	4.1958	1992-05-28	1.40351	0.747017	4.41985				5	23May-17Jun-9Jul-5Aug-3Sep-12Oct										5	100		6.28739	13.5851							11.9068	8.49607							16.0204	3.4313							18.493	1.97959
7	4.8951	1992-05-29	1.05263	0.560262	4.98011				6	23May-13Jun-1Jul-22Jul-15Aug-10Sep-12Oct										6	100		6.28739	10.6879							14.804	1.18464							16.7824							6.54947	10.3344
8	5.59441	1992-05-30	1.28655	0.684765	5.66488				7	23May-10Jun-27Jun-13Jul-1Aug-21Aug-12Sep-12Oct										7	100		6.28739	7.55483							14.4417							3.49542	11.3123							13.2041	0.687878
9	6.29371	1992-05-31	1.16959	0.622514	6.28739				8	23May-8Jun-23Jun-6Jul-22Jul-9Aug-26Aug-16Sep-12Oct										8	100		6.28739	6.28863							12.3395							6.86384	5.68666							12.2803
10	6.99301	1992-06-01	1.16959	0.622514	6.9099				9	23May-6Jun-20Jun-1Jul-14Jul-29Jul-15Aug-30Aug-18Sep-12Oct										9	100		6.28739	4.74729							11.5439							9.20075	1.18464							11.0614
11	7.69231	1992-06-02	1.28655	0.684765	7.59467				10	23May-5Jun-17Jun-28Jun-9Jul-22Jul-5Aug-19Aug-3Sep-20Sep-12Oct										10	100		6.28739	4.11233							9.47279							9.47155							2.43527	8.49607
12	8.39161	1992-06-03	1.40351	0.747017	8.34169				11	23May-4Jun-15Jun-26Jun-4Jul-15Jul-27Jul-10Aug-22Aug-6Sep-21Sep-12Oct										11	100		6.28739	3.11444							8.77745							8.97727							4.62279	4.05257
13	9.09091	1992-06-04	1.99181	1.06014	9.40183				12	23May-3Jun-13Jun-23Jun-1Jul-11Jul-22Jul-3Aug-15Aug-26Aug-10Sep-23Sep-12Oct										12	100		6.28739	2.0543							8.63364							7.94016							6.86384	1.18464
14	9.79021	1992-06-05	1.87485	0.99789	10.3997				13	23May-2Jun-11Jun-21Jun-29Jun-7Jul-16Jul-27Jul-8Aug-18Aug-29Aug-12Sep-24Sep-12Oct										13	100		6.28739	1.30728							7.24544							8.69092							7.18817
15	10.4895	1992-06-06	1.19298	0.634964	11.0347				14	23May-2Jun-10Jun-19Jun-27Jun-4Jul-13Jul-22Jul-1Aug-11Aug-22Aug-31Aug-13Sep-25Sep-12Oct										14	100		6.28739	1.30728							6.24755							7.54736							6.89434
16	11.1888	1992-06-07	1.22105	0.649904	11.6846				15	23May-31May-9Jun-17Jun-25Jun-1Jul-9Jul-17Jul-27Jul-5Aug-15Aug-24Aug-3Sep-15Sep-26Sep-12Oct										15	100		6.28739								6.84516							6.73996							6.59927
17	11.8881	1992-06-08	1.67485	0.89144	12.576				16	23May-31May-8Jun-16Jun-23Jun-29Jun-6Jul-14Jul-22Jul-31Jul-7Aug-18Aug-26Aug-6Sep-16Sep-27Sep-12Oct										16	100		6.28739								6.28863							6.53889							5.80058
18	12.5874	1992-06-09	1.04561	0.556527	13.1326
19	13.2867	1992-06-10	1.33333	0.709666	13.8422
20	13.986	1992-06-11	1.87485	0.99789	14.8401															copied from below… AI137 ff			M	J	J	A	S	O		M	J	J	A	S	O		M	J	J	A	S	O		M	J	J	A	S	O
21	14.6853	1992-06-12	2.22222	1.18278	16.0229																	Tw	4.4458	11.6979	12.7592	10.0175	6.2146	-2.01032		4.4458	11.6979	12.7592	10.0175	6.2146	-2.01032	0	4.4458	11.6979	12.7592	10.0175	6.2146	-2.01032	0	4.4458	11.6979	12.7592	10.0175	6.2146	-2.01032
22	15.3846	1992-06-13	1.78947	0.952446	16.9753
23	16.0839	1992-06-14	0.701754	0.373508	17.3488															calculus…			sample 1							2							3							4
24	16.7832	1992-06-15	1.56023	0.830433	18.1793																		M	J	J	A	S	O		M	J	J	A	S	O		M	J	J	A	S	O		M	J	J	A	S	O
25	17.4825	1992-06-16	1.75789	0.935638	19.1149															1			27.9525	298.202	312.809	219.627	104.903	-9.85018
26	18.1818	1992-06-17	1.42339	0.757599	19.8725															2			27.9525	298.202	229.244							83.5657	219.627	104.903	-9.85018
27	18.8811	1992-06-18	1.17544	0.625626	20.4981															3			27.9525	298.202	15.1151							297.694	103.525							116.103	104.903	-9.85018
28	19.5804	1992-06-19	1.67485	0.89144	21.3896															4			27.9525	217.909							80.2923	229.244							83.5657	185.541							34.0862	104.903	-9.85018
29	20.2797	1992-06-20	2.23392	1.189	22.5786															5			27.9525	158.917							139.285	108.403							204.407	34.3731							185.254	12.3024
30	20.979	1992-06-21	1.78947	0.952446	23.531															6			27.9525	125.026							173.175	15.1151							214.129							83.5657	103.525
31	21.6783	1992-06-22	1.40819	0.749507	24.2805															7			27.9525	88.3755							168.937							40.8889	144.336							168.474	6.89083
32	22.3776	1992-06-23	1.19298	0.634964	24.9155															8			27.9525	73.5637							144.346							80.2923	72.5571							156.687
33	23.0769	1992-06-24	1.28655	0.684765	25.6003															9			27.9525	55.5332							135.039							107.629	15.1151							141.135
34	23.7762	1992-06-25	1.63743	0.871519	26.4718															10			27.9525	48.1055							110.812							110.797							28.4875	108.403
35	24.4755	1992-06-26	1.28655	0.684765	27.1565															11			27.9525	36.4323							102.677							105.015							54.0768	51.7073
36	25.1748	1992-06-27	2.11813	1.12737	28.2839															12			27.9525	24.0309							100.995							92.8831							80.2923	15.1151
37	25.8741	1992-06-28	1.99181	1.06014	29.3441															13			27.9525	15.2924							84.7563							101.665							84.0863
38	26.5734	1992-06-29	2.58363	1.37513	30.7192															14			27.9525	15.2924							73.0831							88.2881							80.6492
39	27.2727	1992-06-30	1.99181	1.06014	31.7793															15			27.9525								80.0739							78.8432							77.1975
40	27.972	1992-07-01	2.22573	1.18464	32.964															16			27.9525								73.5637							76.4911							67.8545
41	28.6713	1992-07-02	1.75439	0.933771	33.8977
42	29.3706	1992-07-03	1.99181	1.06014	34.9579
43	30.0699	1992-07-04	1.64211	0.874009	35.8319
44	30.7692	1992-07-05	2.10526	1.12052	36.9524
45	31.4685	1992-07-06	0.964912	0.513574	37.466
46	32.1678	1992-07-07	1.76959	0.941863	38.4079
47	32.8671	1992-07-08	1.52047	0.809268	39.2171
48	33.5664	1992-07-09	1.9883	1.05827	40.2754
49	34.2657	1992-07-10	0.94269	0.501746	40.7771
50	34.965	1992-07-11	1.3076	0.69597	41.4731
51	35.6643	1992-07-12	1.63743	0.871519	42.3446
52	36.3636	1992-07-13	1.40351	0.747017	43.0917
53	37.0629	1992-07-14	1.75439	0.933771	44.0254
54	37.7622	1992-07-15	1.8152	0.966141	44.9916
55	38.4615	1992-07-16	1.40819	0.749507	45.7411
56	39.1608	1992-07-17	1.40351	0.747017	46.4881
57	39.8601	1992-07-18	1.17544	0.625626	47.1137
58	40.5594	1992-07-19	1.19298	0.634964	47.7487
59	41.2587	1992-07-20	1.05263	0.560262	48.3089
60	41.958	1992-07-21	1.75789	0.935638	49.2446
61	42.6573	1992-07-22	0.94269	0.501746	49.7463
62	43.3566	1992-07-23	1.40351	0.747017	50.4933
63	44.0559	1992-07-24	1.40819	0.749507	51.2428
64	44.7552	1992-07-25	1.40819	0.749507	51.9924
65	45.4545	1992-07-26	1.67485	0.89144	52.8838
66	46.1538	1992-07-27	1.52515	0.811758	53.6956
67	46.8531	1992-07-28	1.52047	0.809268	54.5048
68	47.5524	1992-07-29	1.2924	0.687878	55.1927
69	48.2517	1992-07-30	1.33333	0.709666	55.9024
70	48.951	1992-07-31	0.739181	0.393429	56.2958
71	49.6503	1992-08-01	1.2924	0.687878	56.9837
72	50.3497	1992-08-02	1.3076	0.69597	57.6796
73	51.049	1992-08-03	1.05965	0.563998	58.2436
74	51.7483	1992-08-04	1.3076	0.69597	58.9396
75	52.4476	1992-08-05	1.47953	0.78748	59.7271
76	53.1469	1992-08-06	1.52515	0.811758	60.5388
77	53.8462	1992-08-07	1.33333	0.709666	61.2485
78	54.5455	1992-08-08	1.07836	0.573958	61.8225
79	55.2448	1992-08-09	1.36842	0.728341	62.5508
80	55.9441	1992-08-10	1.3076	0.69597	63.2468
81	56.6434	1992-08-11	1.64211	0.874009	64.1208
82	57.3427	1992-08-12	1.40819	0.749507	64.8703
83	58.042	1992-08-13	0.935673	0.498011	65.3683
84	58.7413	1992-08-14	1.07836	0.573958	65.9423
85	59.4406	1992-08-15	1.2924	0.687878	66.6301
86	60.1399	1992-08-16	1.64211	0.874009	67.5042
87	60.8392	1992-08-17	1.40819	0.749507	68.2537
88	61.5385	1992-08-18	1.42339	0.757599	69.0113
89	62.2378	1992-08-19	1.2924	0.687878	69.6991
90	62.9371	1992-08-20	1.52515	0.811758	70.5109
91	63.6364	1992-08-21	1.16959	0.622514	71.1334
92	64.3357	1992-08-22	1.17544	0.625626	71.759
93	65.035	1992-08-23	1.64211	0.874009	72.633
94	65.7343	1992-08-24	1.64211	0.874009	73.5071
95	66.4336	1992-08-25	1.16959	0.622514	74.1296
96	67.1329	1992-08-26	1.2924	0.687878	74.8174
97	67.8322	1992-08-27	1.40819	0.749507	75.567
98	68.5315	1992-08-28	1.05263	0.560262	76.1272
99	69.2308	1992-08-29	1.17544	0.625626	76.7528
100	69.9301	1992-08-30	1.42339	0.757599	77.5104
101	70.6294	1992-08-31	1.33333	0.709666	78.2201
102	71.3287	1992-09-01	1.36842	0.728341	78.9484
103	72.028	1992-09-02	1.17544	0.625626	79.5741
104	72.7273	1992-09-03	1.17544	0.625626	80.1997
105	73.4266	1992-09-04	0.630409	0.335535	80.5352
106	74.1259	1992-09-05	0.739181	0.393429	80.9287
107	74.8252	1992-09-06	0.818713	0.43576	81.3644
108	75.5245	1992-09-07	1.04561	0.556527	81.921
109	76.2238	1992-09-08	0.711111	0.378488	82.2994
110	76.9231	1992-09-09	1.10994	0.590766	82.8902
111	77.6224	1992-09-10	1.19298	0.634964	83.5252
112	78.3217	1992-09-11	1.04561	0.556527	84.0817
113	79.021	1992-09-12	1.10994	0.590766	84.6725
114	79.7203	1992-09-13	1.36374	0.725851	85.3983																								airT Stensele
115	80.4196	1992-09-14	1.52515	0.811758	86.2101																								YEAR	Jan	Feb	Mar	Apr	May	Jun	Jul	Aug	Sep	Oct	Nov	Dec
116	81.1189	1992-09-15	1.25965	0.670447	86.8805																								1973	-4	-9.4	-1.7	-1.5	5.4	11.9	16.9	10.8	4.2	-1.8	-7.6	-13.5
117	81.8182	1992-09-16	1.40819	0.749507	87.63																								1974	-5.8	-6.2	-5.6	1.8	6.9	12.6	12.7	11.7	8.9	0.4	-6.3	-9.2
118	82.5175	1992-09-17	0.851462	0.45319	88.0832																								1975	-8.9	-4.4	-3	-1.2	6.1	9.3	12.9	11.6	7.9	2.2	-2.1	-7
119	83.2168	1992-09-18	1.70292	0.90638	88.9896																								1976	-16.9	-7.6	-8	-0.8	8.2	10.8	13	12.6	3.8	-0.3	-4.5	-11.4
120	83.9161	1992-09-19	0.964912	0.513574	89.5032																								1977	-12.6	-15.6	-3.4	-2.7	4.1	9.9	12.6	11.5	6.2	1.9	-4.9	-6.4
121	84.6154	1992-09-20	0.818713	0.43576	89.9389																								1978	-11.6	-16.5	-7	-2.1	5.3	11.7	13.5	10.9	5.7	1	-5.6	-19
122	85.3147	1992-09-21	1.40351	0.747017	90.6859																								1979	-18	-13	-4.6	-1	5.7	12.7	13.5	11.8	6	-0.8	-4.9	-10.7
123	86.014	1992-09-22	0.964912	0.513574	91.1995																								1980	-15.6	-15.4	-8.7	1.6	6	14.2	15.4	12.3	8	-1.3	-11.3	-12.9
124	86.7133	1992-09-23	0.818713	0.43576	91.6353
125	87.4126	1992-09-24	0.99883	0.531627	92.1669																								Tw (reco river water T)
126	88.1119	1992-09-25	0.964912	0.513574	92.6805																								YEAR	Jan	Feb	Mar	Apr	May	Jun	Jul	Aug	Sep	Oct	Nov	Dec
127	88.8112	1992-09-26	0.851462	0.45319	93.1337																								1973					3.91516	9.66376	14.0858	8.69092	2.85388	-2.45252
128	89.5105	1992-09-27	0.935673	0.498011	93.6317																								1974					5.24176	10.2828	10.3713	9.48688	7.01056	-0.50684
129	90.2098	1992-09-28	0.964912	0.513574	94.1453																								1975					4.53424	7.36432	10.5482	9.39844	6.12616	1.08508
130	90.9091	1992-09-29	0.94269	0.501746	94.647																								1976					6.39148	8.69092	10.6366	10.2828	2.50012	-1.12592
131	91.6084	1992-09-30	0.851462	0.45319	95.1002																								1977					2.76544	7.89496	10.2828	9.31	4.62268	0.81976
132	92.3077	1992-10-01	0.739181	0.393429	95.4936																								1978					3.82672	9.48688	11.0788	8.77936	4.18048	0.0238
133	93.007	1992-10-02	0.964912	0.513574	96.0072																								1979					4.18048	10.3713	11.0788	9.57532	4.4458	-1.56812
134	93.7063	1992-10-03	0.891228	0.474356	96.4816																								1980					4.4458	11.6979	12.7592	10.0175	6.2146	-2.01032
135	94.4056	1992-10-04	0.711111	0.378488	96.86																											first	copy Tw data from desired year
136	95.1049	1992-10-05	0.596491	0.317482	97.1775																												paste as…	4.4458	11.6979	12.7592	10.0175	6.2146	-2.01032
137	95.8042	1992-10-06	0.701754	0.373508	97.551																												and copy again
138	96.5035	1992-10-07	0.481871	0.256476	97.8075
139	97.2028	1992-10-08	0.826901	0.440117	98.2476
140	97.9021	1992-10-09	0.701754	0.373508	98.6211																											second	… then past here transposed				transpose…
141	98.6014	1992-10-10	0.826901	0.440117	99.0612																														May	9	4.4458
142	99.3007	1992-10-11	1.05263	0.560262	99.6215																														Jun	30	11.6979
143	100	1992-10-12	0.711111	0.378488	100																														Jul	31	12.7592
																																			Aug	31	10.0175
			187.882	100																															Sep	30	6.2146
										Relative proportion of time of the growing season contained in each sample of the annual increment																									Oct	12	-2.01032
										# Samples/yr	weights = %days growing season																									143				proportionate arithmetic Tw means
		9	May	11.8129	6.28739	6.28739	0.698599				1st	2nd	3rd	4th	5	6	7	8	9	10	11	12	13	14	15	16			temporal range of samples											1	2	3	4	5	6	7	8	9	10
		30	June	47.8947	25.4919	31.7793	0.849731		100	1	100																	1	23May-12Oct											8.80657
		31	July	46.062	24.5165	56.2958	0.790854		100	2	42.66	57.34																2	23May-22Jul-12Oct											11.0107	7.16695
		31	August	41.1918	21.9243	78.2201	0.707236		100	3	27.97	31.47	40.56															3	23May-1Jul-15Aug-12Oct											9.84653	11.8453	5.56197
		30	September	31.7146	16.8801	95.1002	0.56267		100	4	22.38	20.28	24.47	32.87														4	23May-23Jun-22Jul-26Aug-12Oct											9.65823	12.503	10.6626	4.51919
		12	October	9.20585	4.89981	100	0.408317		100	5	18.18	15.39	18.88	20.27	27.28													5	23May-17Jun-9Jul-5Aug-3Sep-12Oct											9.18754	12.132	12.2514	8.96115	3.13026
		143		187.882	100				100	6	15.38	12.59	14.69	16.78	18.18	22.38												6	23May-13Jun-1Jul-22Jul-15Aug-10Sep-12Oct											8.73112	11.7568	12.7592	10.9711	8.55486	2.92463
									100	7	13.29	11.88	11.19	13.29	13.99	16.08	20.28											7	23May-10Jun-27Jun-13Jul-1Aug-21Aug-12Sep-12Oct											8.26268	11.6979	12.5602	12.6149	10.0175	7.67726	2.41848
									100	8	11.59	10.79	9.09	11.19	12.58	11.89	14.69	18.18										8	23May-8Jun-23Jun-6Jul-22Jul-9Aug-26Aug-16Sep-12Oct											7.85854	11.6979	12.3877	12.7592	12.5979	10.0175	7.12006	2.41848
		equidistant samples	corresp to percent time passed						100	9	10.49	9.79	7.69	9.09	10.49	11.89	10.49	13.29	16.78									9	23May-6Jun-20Jun-1Jul-14Jul-29Jul-15Aug-30Aug-18Sep-12Oct											7.34663	11.6979	12.1877	12.7592	12.7592	10.3401	10.0175	6.41475	2.10214
		6.25	6.29371	1992-05-31					100	10	9.79	8.39	7.69	7.7	9.09	9.78	9.8	10.49	11.89	15.38								10	23May-5Jun-17Jun-28Jun-9Jul-22Jul-5Aug-19Aug-3Sep-20Sep-12Oct											7.03583	11.6979	11.6979	12.5662	12.7592	11.7047	10.0175	9.25694	6.2146	1.72828
		12.5	11.8881	1992-06-08					100	11	9.09	7.69	7.7	5.59	7.69	8.39	9.79	8.4	10.49	10.48	14.69							11	23May-4Jun-15Jun-26Jun-4Jul-15Jul-27Jul-10Aug-22Aug-6Sep-21Sep-12Oct											6.67721	11.6979	11.6979	11.6979	12.7592	12.7592	10.8008	10.0175	8.49635	6.2146
		18.75	17.4825	1992-06-16					100	12	8.39	6.99	7	5.59	6.99	7.7	8.39	8.39	7.69	10.49	9.09	13.29						12	23May-3Jun-13Jun-23Jun-1Jul-11Jul-22Jul-3Aug-15Aug-26Aug-10Sep-23Sep-12Oct											6.25882	11.6979	11.6979	11.8305	12.7592	12.7592	12.0737	10.0175	10.0175	7.48224
		25	22.3776	1992-06-23					100	13	7.69	6.3	6.99	5.59	5.6	6.29	7.69	8.4	6.99	7.69	9.79	8.39	12.59					13	23May-2Jun-11Jun-21Jun-29Jun-7Jul-16Jul-27Jul-8Aug-18Aug-29Aug-12Sep-24Sep-12Oct											5.76436	11.6979	11.6979	11.6979	12.6265	12.7592	12.7592	11.469	10.0175	10.0175
		31.25	26.5734	1992-06-29					100	14	7.69	5.6	6.29	5.59	4.9	6.29	6.3	6.99	6.99	7.7	6.28	9.1	8.39	11.89				14	23May-2Jun-10Jun-19Jun-27Jun-4Jul-13Jul-22Jul-1Aug-11Aug-22Aug-31Aug-13Sep-25Sep-12Oct											5.76436	11.6979	11.6979	11.6979	12.3043	12.7592	12.7592	12.485	10.0175	10.0175
		37.5	31.4685	1992-07-06					100	15	6.29	6.3	5.59	5.6	4.19	5.6	5.59	6.99	6.3	6.99	6.29	7	8.38	7.7	11.19			15	23May-31May-9Jun-17Jun-25Jun-1Jul-9Jul-17Jul-27Jul-5Aug-15Aug-24Aug-3Sep-15Sep-26Sep-12Oct											4.4458	11.6979	11.6979	11.6979	11.8748	12.7592	12.7592	12.7592	11.236	10.0175
		43.75	37.0629	1992-07-14					100	16	6.29	5.6	5.59	4.9	4.19	4.9	5.59	5.6	6.29	4.9	7.69	5.59	7.7	6.99	7.69	10.49		16	23May-31May-8Jun-16Jun-23Jun-29Jun-6Jul-14Jul-22Jul-31Jul-7Aug-18Aug-26Aug-6Sep-16Sep-27Sep-12Oct											4.4458	11.6979	11.6979	11.6979	11.6979	12.6075	12.7592	12.7592	12.7592	10.0175
		50	42.6573	1992-07-22
		56.25	48.951	1992-07-31
		62.5	53.8462	1992-08-07
		68.75	61.5385	1992-08-18
		75	67.1329	1992-08-26
		81.25	74.8252	1992-09-06						(1) compute proportion of sample (%) in annual increment; example 16 samples: 1/16 per milling step = 6.25%
		87.5	81.8182	1992-09-16						(2) compute cumulative sample step curve (%); example 1st sample = 6.25%, 2nd sample = 12.5% etc. of annual increment																						third	… copy desired line of weighted Tw means, past as … somwhere, copy again and pasted transposed in ED-NJB-A6R etc.
		93.75	89.5105	1992-09-27						(3) use curve of 2 to check how much time is contained in each sample: nearest value in column F, get data from column B and date from column C
		100								(4) compute "weights" = determine how much relative time is represented by each milling step of a given year
											fast growing shell portions get lower weight than slow growing portions, i.e., sample in fast growing shell portions contains less time
					Growth of annual incr during month in %					(5) note dates at which each sample ends (temporal ranges)
					May	6.28739	6.28739			(6) switch to shell data, determine # of samples per annual increment to determine which temporal range scheme will be used in 7 to 9																														weighted Tw means
					June	25.4926	31.7793				weights can be used to compute weighted annual means of whatever is measured in shell																arithmetic mean		temporal range of samples											1	2	3	4	5	6	7	8	9	10
					July	24.5165	56.2958																				9.53644	1	23May-12Oct											9.53644
					August	21.9243	78.2201																				9.54466	2	23May-22Jul-12Oct											11.1646	7.92471
					September	16.8801	95.1002																				9.5327	3	23May-1Jul-15Aug-12Oct											10.3528	11.9176	6.32773
					October	4.89981	100		0																		9.54887	4	23May-23Jun-22Jul-26Aug-12Oct											9.86783	12.4658	10.7337	5.12811
																											9.52956	5	23May-17Jun-9Jul-5Aug-3Sep-12Oct											9.40342	12.1398	12.2755	9.6498	4.17925
																											9.53672	6	23May-13Jun-1Jul-22Jul-15Aug-10Sep-12Oct											9.01183	11.7765	12.7592	11.081	8.8234	3.76841
																											9.57739	7	23May-10Jun-27Jun-13Jul-1Aug-21Aug-12Sep-12Oct											8.40385	11.6979	12.5086	12.6234	10.0175	8.20515	3.58531
																											9.54082	8	23May-8Jun-23Jun-6Jul-22Jul-9Aug-26Aug-16Sep-12Oct											8.0722	11.6979	12.1787	12.7592	11.4199	10.0175	7.22455	2.95667
																											9.54494	9	23May-6Jun-20Jun-1Jul-14Jul-29Jul-15Aug-30Aug-18Sep-12Oct											7.56576	11.6979	11.8189	12.7592	12.7592	10.2819	10.0175	6.4497	2.55438
																											9.55494	10	23May-5Jun-17Jun-28Jun-9Jul-22Jul-5Aug-19Aug-3Sep-20Sep-12Oct											7.31347	11.6979	11.6979	12.5227	12.7592	11.8166	10.0175	9.30058	6.2146	2.20901
																											9.60111	11	23May-4Jun-15Jun-26Jun-4Jul-15Jul-27Jul-10Aug-22Aug-6Sep-21Sep-12Oct											6.84811	11.6979	11.6979	12.1936	12.7592	12.7592	10.7639	10.0175	8.77264	6.2146
																											9.5398	12	23May-3Jun-13Jun-23Jun-1Jul-11Jul-22Jul-3Aug-15Aug-26Aug-10Sep-23Sep-12Oct											6.23176	11.6979	11.6979	11.8541	12.7592	12.7592	12.1307	10.0175	10.0175	7.70064
																											9.54247	13	23May-2Jun-11Jun-21Jun-29Jun-7Jul-16Jul-27Jul-8Aug-18Aug-29Aug-12Sep-24Sep-12Oct											5.69411	11.6979	11.6979	11.6979	12.6128	12.7592	12.7592	10.8947	10.0175	10.0175
																											9.5902	14	23May-2Jun-10Jun-19Jun-27Jun-4Jul-13Jul-22Jul-1Aug-11Aug-22Aug-31Aug-13Sep-25Sep-12Oct											5.69411	11.6979	11.6979	11.6979	12.2677	12.7592	12.7592	12.4986	10.0175	10.0175
																											9.50734	15	23May-31May-9Jun-17Jun-25Jun-1Jul-9Jul-17Jul-27Jul-5Aug-15Aug-24Aug-3Sep-15Sep-26Sep-12Oct											4.4458	11.6979	11.6979	11.6979	11.8915	12.7592	12.7592	12.7592	11.1995	10.0175
																											9.54165	16	23May-31May-8Jun-16Jun-23Jun-29Jun-6Jul-14Jul-22Jul-31Jul-7Aug-18Aug-26Aug-6Sep-16Sep-27Sep-12Oct											4.4458	11.6979	11.6979	11.6979	11.6979	12.5924	12.7592	12.7592	12.7592	10.0175
																														Due to seasonal variations of growth rate, weighted averages of T are required. For each sample a weighted T average must be computed that considers variations in growth rate during time of formation of the respective shell portion.
																														T averages of each sample of one year can be arithmetically averaged to obtain the average temperature during the growing season (Example in AB179 ff.)
																														To compute d18O(water) from d18O(shell) and Tw, the weighted d18O(shell) is multiplied with the weighted Tw.
[truncated: 84 more columns]

## Sheet: seasonal
seasonal, ontogenetically sorted
	ED-NJB-A6R			ED-NJB-A4R			ED-GTB-A1R			ED-GTB-A2R
	d18O	d13C		d18O	d13C		d18O	d13C		d18O	d13C
1	-9.88244	-8.49886		-9.81324	-8.53893		-8.2041	-11.7097	-7	-8.37474	-10.3228
2	-10.1791	-8.68463		-10.413	-8.46875		-8.29016	-11.6758		-8.0511	-10.8457
3	-9.87993	-8.63423		-10.2256	-8.34085		-8.44848	-10.9413		-7.69666	-10.6378	-7
4	-9.49314	-8.31065	-7	-10.0172	-8.88442	-7	-8.55715	-10.9012		-8.54866	-11.7547	-7
5	-9.79757	-8.27374		-10.5083	-9.48437		-8.68074	-11.2531		-8.65938	-11.9594
6	-9.84517	-8.27555		-10.4536	-8.93815		-8.58707	-11.0828		-8.39783	-11.757
7	-9.92691	-8.42719		-10.4847	-8.61606		-8.49593	-11.1244		-8.94154	-12.1007
8	-10.3605	-9.08792		-10.3168	-9.05563		-8.65504	-11.1273		-8.89596	-12.0601
9	-9.85094	-9.00304		-10.6542	-8.74165		-8.15146	-11.3455	-7	-8.44002	-11.3423
10	-9.64248	-8.89403		-10.418	-7.94275	-7	-8.95383	-11.0277		-8.76934	-11.6554
11	-9.68909	-8.70235	-7	-10.4146	-9.46237		-8.59225	-10.8627		-8.68376	-11.7807
12	-10.9101	-9.14268		-10.3929	-9.88347		-8.64807	-11.0406		-8.87689	-12.1449
13	-10.6412	-8.9216		-10.2094	-10.1019		-8.84137	-11.0548		-8.65059	-12.0489
14	-10.1089	-8.71625		-10.3627	-10.1927		-8.5858	-11.0744		-8.49518	-11.3715
15	-10.2858	-9.23138		-10.3545	-9.59246		-9.31367	-11.6967		-8.54698	-11.531
16	-10.0385	-8.8803		-10.4294	-9.58677		-9.29352	-12.0241		-8.3114	-11.1608
17	-10.1808	-8.95629		-10.3956	-9.44694		-9.03182	-11.5847		-8.54531	-11.1973
18	-9.71738	-8.48979		-10.001	-8.83359	-7	-9.33071	-11.8828		-7.94713	-10.8122	-7
19	-9.9557	-8.65918	-7	-10.0153	-9.01251		-8.90758	-11.9831		-8.42884	-10.9091
20	-10.1276	-8.5164		-9.5481	-8.87091		-8.90927	-12.4104	-7	-8.6891	-10.9067
21	-10.0261	-8.78609		-9.41978	-9.84447		-9.01763	-12.7074		-8.80434	-10.9283
22	-9.74528	-7.7085		-9.54225	-9.91926		-8.9136	-12.5871		-8.92205	-11.3107
23	-9.34781	-7.4026		-9.70928	-10.7286		-8.87393	-12.7263		-8.66177	-10.6477
24	-9.30052	-8.58723		-9.74294	-10.545		-9.03163	-12.4961		-8.9688	-11.0973
25	-9.46895	-8.10513		-9.81859	-10.9878		-9.50697	-12.9002		-8.70715	-10.5045
26	-9.61301	-8.26706		-9.89424	-11.4307		-9.8759	-12.7503		-8.53347	-10.4935
27	-9.6324	-8.39744		-10.1655	-11.6461		-9.86074	-12.351		-8.80694	-10.7283
28	-9.63561	-9.03988		-9.74547	-11.0546	-7	-9.51666	-11.6983		-9.08921	-11.4509
29	-9.55001	-9.56423		-9.91145	-10.8988		-9.40915	-11.9396		-9.22512	-11.5294
30	-9.16204	-9.51711	-7	-10.337	-11.1901		-9.18816	-11.7558	-7	-9.18461	-11.7353
31	-9.46861	-9.49408		-10.0505	-10.587		-9.75979	-12.581		-9.14357	-11.4268
32	-9.32772	-9.3533		-10.2235	-11.3817		-9.86157	-12.7538		-8.74727	-10.9256	-7
33	-9.3124	-9.65875		-9.78131	-10.2863	-7	-9.91755	-12.8367		-9.04356	-11.2837
34	-9.6975	-9.36728		-9.99384	-10.4712		-9.96946	-12.7728		-9.54145	-12.2964
35	-9.85077	-9.38109		-9.71713	-10.5648		-10.4722	-13.4823		-9.09221	-11.7719
36	-10.1853	-9.06908		-9.81613	-11.1146		-10.0998	-12.978		-9.31419	-12.1493
37	-10.0406	-9.29154		-9.93051	-11.2995		-10.1799	-13.0649		-9.08703	-11.7091
38	-9.60541	-8.65315	-7	-9.63055	-11.1329	-7	-9.48364	-12.2887	-7	-9.58516	-12.5299
39	-9.72433	-8.59868		-10.202	-12.1923		-9.54119	-12.7538		-9.46486	-12.3611
40	-9.4557	-8.70694		-10.0315	-12.4365		-9.43292	-12.8422		-8.94071	-11.6386
41	-10.0121	-9.48832		-9.72185	-11.5998		-9.6316	-13.5739		-9.07146	-12.1678
42	-10.1688	-9.35362		-9.84453	-11.6066		-9.50586	-13.3025		-9.39311	-12.2977
43	-10.2961	-9.16825		-9.71829	-11.2084	-7	-9.59674	-13.3318		-9.33088	-12.3969
44	-10.1671	-8.87725		-10.0148	-12.2184		-9.55413	-13.4942		-9.24502	-12.2665
45	-10.2428	-9.08211		-9.48828	-10.8513		-9.55659	-13.5291		-9.02604	-11.9493	-7
46	-10.1754	-9.02508		-9.29042	-10.7734		-9.2129	-12.9079	-7	-9.01211	-11.9314
47	-9.87558	-8.71033	-7	-9.09256	-10.6954	-7	-8.99769	-12.6793		-8.93991	-11.8574
48	-10.0207	-9.58689		-9.3134	-11.4771		-9.51478	-13.4514		-8.83487	-11.7256
49	-10.2791	-10.0421		-9.45446	-12.7203		-9.80081	-13.6934		-8.68733	-11.5343
50	-10.5375	-10.4974		-9.37187	-12.8699		-9.75226	-13.4838		-8.55475	-11.4037
51	-10.4284	-10.2334		-9.12298	-11.7461	-7	-9.88295	-13.6993		-8.69907	-11.5221
52	-10.2724	-10.3835		-9.66129	-11.9506		-9.86464	-13.6857		-8.8744	-11.8102
53	-10.5171	-10.1661		-9.95448	-12.1497		-9.89276	-13.6481		-9.01297	-12.1007
54	-10.4977	-10.0264		-9.96187	-12.168		-9.77357	-13.4721		-8.77491	-11.7003
55	-10.3295	-9.64833		-9.88051	-12.0579		-9.64378	-13.2637		-8.54575	-11.6789
56	-10.0113	-8.95728		-10.0234	-12.4166		-9.48601	-13.0181		-8.39183	-11.278
57	-9.98526	-9.63108		-9.84781	-12.1507		-9.59476	-13.171		-8.13597	-11.3804	-7
58	-9.31065	-8.21096	-7	-9.9017	-12.1036		-9.10706	-11.8045	-7	-8.26152	-11.4232
59	-9.64998	-9.05538		-9.6642	-11.4995	-7	-9.54525	-12.3138		-8.68035	-12.2596
60	-10.1983	-10.2344		-10.0764	-12.5741		-9.81553	-12.4611		-8.92186	-12.6779
61	-10.7274	-10.9018		-10.3401	-12.865		-10.0674	-12.847		-8.76912	-12.637
62	-10.6041	-11.085		-10.6184	-13.347		-10.2266	-12.8393		-8.84267	-12.8387
63	-10.3499	-11.0285		-10.4793	-12.3464		-10.2036	-12.9773		-8.22297	-11.8735
64	-10.7432	-11.5911		-10.3997	-11.2467		-10.1643	-12.9397		-7.83543	-11.1349
65	-10.665	-11.3219		-10.04	-10.4997		-9.93284	-12.6036		-8.14493	-11.8091
66	-10.6931	-11.6324		-10.0176	-10.6529	-7	-9.5005	-12.2432		-8.43134	-12.2646
67	-10.7274	-11.7158		-10.3764	-12.9718		-9.58038	-12.4007		-8.66182	-12.6491
68	-10.5829	-12.101		-10.4296	-13.4859		-9.56504	-12.4978	-7	-8.46314	-12.4846
69	-10.5398	-11.7631		-10.5752	-14.2206		-10.1548	-13.4367		-8.14321	-11.6608	-7
70	-9.56563	-10.9489	-7	-10.3407	-13.6736	-7	-9.99389	-13.3838		-8.28902	-11.5752
71	-9.82018	-10.6189		-10.4166	-13.2827		-10.1058	-13.9541		-8.25826	-11.6896
72	-9.70796	-10.4664		-10.4546	-13.4185		-9.81356	-13.3452		-8.63851	-12.1134
73	-10.0304	-10.7203		-10.3934	-12.9295		-9.54202	-12.9617		-8.91814	-12.7338
74	-10.0239	-11.2569		-10.3789	-12.693		-9.96565	-13.7631		-8.70367	-12.2581
75	-10.5092	-12.1146		-10.2995	-12.4733		-9.83711	-13.359		-8.43302	-12.0146
76	-10.0626	-12.0838		-9.95641	-12.0125		-9.9292	-13.3927		-8.47365	-12.0817
77	-9.19595	-10.7451		-9.71819	-11.7718	-7	-9.81237	-13.4021		-8.2989	-11.5096	-7
78	-9.67332	-10.8022		-9.47996	-11.5312		-9.90125	-13.1557		-8.90702	-11.6829
79	-9.66397	-11.0438		-9.57972	-11.8293		-9.51093	-12.9216	-7	-9.14061	-11.9918
80	-9.83752	-11.0168		-9.7592	-12.0674		-9.67155	-13.2377		-9.54804	-12.6681
81	-9.9811	-10.9193		-9.75113	-12.1946		-9.61113	-13.1017		-9.42383	-12.8454
82	-10.1247	-10.8217		-9.50028	-11.45	-7	-9.42203	-12.6995		-9.21636	-12.5468
83	-9.94131	-10.7021		-9.78818	-12.6028		-9.41272	-12.5473		-9.16886	-12.4233
84	-9.72339	-10.1129		-10.0821	-13.0188		-9.72534	-13.0745		-8.76062	-11.6682	-7
85	-9.6672	-10.1623	-7	-9.78071	-12.6609		-9.66502	-13.2664		-8.75503	-11.7769
86	-9.87783	-10.4238		-9.78406	-12.7517		-9.48972	-12.7889		-9.22344	-12.2534
87	-10.1454	-10.7714		-9.49812	-12.4078		-9.58066	-13.1056		-9.00468	-12.357
88	-10.0887	-10.5122		-9.35763	-12.1385		-9.64306	-13.3823		-9.10837	-12.6581
89	-9.66009	-9.70062		-9.28764	-12.1917		-9.71317	-13.274		-8.93417	-12.4446
90	-9.70269	-9.90668		-8.9858	-11.991	-7	-9.51887	-12.8967		-8.8881	-12.1903
91	-9.22279	-9.28895		-9.1289	-11.9808		-9.47955	-12.8651	-7	-8.87874	-12.1799
92	-9.50809	-9.90968		-9.178	-12.2423		-9.53425	-13.0194		-9.1424	-12.2941
93	-9.94144	-10.144		-9.51366	-12.6357		-9.62768	-12.9943		-8.78113	-11.9105	-7
94	-9.71643	-9.88247		-9.58866	-12.865		-9.50824	-12.6488		-9.97782	-13.1989
95	-9.68625	-9.53785		-9.89422	-13.3195		-9.59625	-12.9381		-10.2463	-13.8157
96	-8.62747	-9.06662	-7	-9.85233	-13.3435	-7	-9.77725	-13.0794		-10.0153	-13.7691
97	-9.16535	-10.497		-9.89128	-13.402		-9.75416	-13.183		-9.7397	-13.4883
98	-9.43778	-10.6533		-9.65885	-13.1329		-9.63176	-13.02		-9.57856	-12.9954
99	-9.20971	-10.291		-9.60483	-12.7436		-9.79602	-13.0106		-9.22613	-12.3025
100	-10.1337	-11.8856		-9.81676	-13.3109		-9.7587	-13.4489		-8.62298	-10.9716	-7
101	-10.3145	-12.3297		-9.75807	-13.1485		-9.80888	-13.0956		-9.18785	-11.6246
102	-10.1534	-12.0581		-9.63751	-12.7739	-7	-10.0936	-13.609		-9.82659	-12.4824
103	-10.1714	-12.221		-9.88238	-12.6794		-9.61999	-13.4088	-7	-10.8502	-13.645
104	-9.89854	-10.608		-10.2421	-12.8491		-9.78508	-13.3523		-10.7759	-13.8838
105	-9.87212	-10.8173		-10.1877	-12.9445		-9.77576	-13.447		-10.1741	-13.5341
106	-9.17106	-9.647	-7	-9.82856	-12.6495		-9.81631	-13.032		-9.68055	-12.8364
107	-9.6672	-10.1623		-9.83523	-12.7368		-9.99617	-13.5693		-9.65565	-12.8882
108	-9.16693	-9.91394		-9.80198	-12.5321		-9.76501	-13.647	-7	-9.38677	-12.7657
109	-9.52452	-11.5946		-9.86896	-13.1112		-10.1801	-14.1517		-9.36396	-12.7049
110	-9.66731	-11.9367		-9.80026	-12.8836		-10.1873	-13.9328		-9.35576	-13.1535
111	-9.82051	-11.9451		-9.79883	-13.0871		-9.99704	-13.7385		-8.94114	-12.1223	-7
112	-10.0194	-12.2687		-9.71737	-12.6645	-7	-10.1833	-14.2579		-9.91244	-13.4554
113	-9.71519	-12.6381		-10.0761	-13.0649		-10.0426	-14.2899		-9.77901	-13.1354
114	-9.90258	-12.9516		-9.89217	-12.7344		-10.1981	-14.4803		-9.85558	-13.2288
115	-9.25268	-12.374		-9.77157	-12.6631		-9.79098	-13.9093	-7	-9.99069	-13.5025
116	-9.06805	-12.0612	-7	-10.2247	-12.5684		-9.07527	-12.7083		-9.65471	-13.1988
117	-9.43875	-12.4973		-10.5546	-12.4353	-7	-9.62211	-13.841		-9.8375	-13.2276
118	-9.7004	-12.7166		-10.6453	-12.7988		-9.52988	-13.4527		-9.63665	-12.7185
119	-9.79636	-12.7624		-10.6726	-13.0915		-9.95145	-14.2121		-9.38544	-12.0276	-7
120	-9.80151	-11.7995		-10.406	-12.7825		-9.61141	-13.746		-9.76179	-12.6666
121	-9.95338	-12.5742		-10.3506	-12.967		-9.58122	-13.867	-7	-9.88962	-12.8068
122	-9.88308	-11.9834		-10.1125	-12.8931	-7	-9.41567	-13.6054		-9.78729	-12.7243
123	-9.83392	-11.9756		-10.3241	-12.7643		-9.58431	-13.689		-9.84941	-12.9501
124	-9.84141	-11.9231		-9.96939	-12.647		-9.91835	-14.3362		-9.83755	-12.7637
125	-9.64403	-11.5719		-10.0416	-12.6087		-9.86556	-14.2182		-10.008	-12.8652
126	-9.298	-11.4528	-7	-9.63226	-12.3812		-9.81277	-14.1002		-9.91724	-12.9604
127	-9.27788	-11.4761		-9.25614	-12.5974		-9.78488	-14.3206		-9.90257	-12.9262
128	-10.1772	-12.5801		-9.21142	-12.4437	-7	-9.56001	-14.1138		-9.8992	-12.9162
129	-9.99463	-12.4063		-9.28754	-12.6147		-9.78855	-14.2296		-10.0301	-13.0662
130	-10.4095	-12.9173		-9.30755	-12.7009		-9.20417	-12.9599		-9.86041	-12.9043
131	-10.4472	-12.8094		-9.36259	-12.5464		-9.0475	-13.0589	-7	-9.90202	-12.8086
132	-10.2334	-12.4832		-9.44468	-12.5271		-9.39162	-13.3381		-9.78322	-12.5428	-7
133	-10.0672	-12.5136		-9.3693	-12.2545		-9.34594	-13.2014		-9.93464	-12.149
134	-10.0826	-12.413		-9.2621	-12.3589		-9.73001	-14.3413		-9.87443	-12.1869
135	-9.95486	-12.1589	-7	-9.10742	-12.0648	-7	-9.23396	-13.0359		-9.9739	-12.4648
136	-9.82714	-11.9048		-9.42373	-12.8232		-9.42079	-13.0376		-10.0683	-12.665
137	-9.73228	-12.0193		-9.18355	-12.3872		-9.49148	-12.9611		-9.94308	-12.3405	-7
138	-9.82697	-12.5618		-9.20496	-12.5251		-9.28652	-12.9311		-9.88959	-12.2793
139	-9.65071	-12.1886		-9.34687	-12.8412	-7	-9.28249	-13.1989		-9.92766	-12.4428
140	-10.004	-13.002		-9.23432	-12.6551		-9.45144	-13.0703		-9.8721	-12.3565
141	-9.47378	-12.8164		-9.17783	-13.2808		-9.32584	-13.0505		-10.0763	-12.6754
142	-10.098	-14.1278		-9.11655	-12.89		-9.07602	-12.6861		-9.83434	-12.6624
143	-10.0636	-14.2298		-9.39366	-12.8729	-7	-9.07872	-12.6484	-7	-9.9699	-12.9116
144	-9.56349	-13.2736		-9.7353	-13.2088		-9.1902	-12.8167		-9.56688	-12.4064	-7
145	-9.36983	-12.6167	-7	-9.49796	-13.0366		-9.4472	-13.11		-9.66601	-12.5724
146	-9.74525	-12.7489		-9.5958	-13.4097		-9.12467	-12.8069		-9.73192	-12.6975
147	-10.167	-13.0646		-9.39897	-12.8815		-9.56274	-13.4353		-9.70157	-12.5047
148	-10.2799	-13.2145		-9.45155	-13.1684		-9.15552	-12.7218		-9.65528	-12.5516
149	-9.55211	-11.8583	-7	-9.21197	-12.8863	-7	-9.02171	-12.7713		-9.45401	-12.3862
150	-9.5867	-11.4672		-9.4875	-12.4028		-9.21184	-12.8585	-7	-9.58984	-12.3403	-7
151	-10.2166	-12.2825		-9.77299	-12.8875		-9.06701	-12.7538		-9.47279	-12.3734
152	-10.4953	-12.5495		-9.75633	-12.4164		-9.10683	-12.5445		-9.27798	-12.376
153	-10.7517	-13.0129		-9.62287	-12.4973		-9.04868	-12.8692		-9.37316	-12.5261
154	-11.1016	-13.5849		-9.67536	-12.2346	-7	-8.94896	-12.7261		-9.43924	-12.6601
155	-10.3212	-12.5853					-9.26615	-12.8229		-9.39195	-12.6949
156	-9.64266	-11.6255					-9.04644	-12.9409		-9.19783	-12.9284
157	-9.59368	-11.4266					-8.8554	-12.7876		-9.0313	-12.8106	-7
158	-9.47371	-11.762	-7				-9.01348	-13.0356	-7	-9.0815	-12.6468
159	-9.63842	-12.8189					-8.72221	-12.4816		-9.00373	-12.6881
160	-9.49938	-12.9324					-8.91958	-12.7068		-9.11913	-12.5113
161	-9.54507	-13.2574					-8.90614	-12.6544		-8.99349	-12.5948
162	-9.28253	-12.2733					-9.03811	-12.8747		-9.03702	-12.9964
163	-9.16275	-12.4842					-8.94946	-12.4269		-8.72913	-12.4653
164	-9.07195	-11.7807					-9.19662	-13.2697		-8.78646	-12.3863
165	-9.36148	-12.3592	-7				-9.20488	-13.7429		-8.79368	-12.406
166	-9.41267	-12.7407					-9.13668	-13.7595		-9.01864	-12.496
167	-8.80492	-11.6375					-9.12928	-13.448		-9.32381	-13.3271
168	-9.17658	-12.3058					-9.02145	-12.7043		-9.00922	-12.7864
169	-9.57353	-12.7365					-8.96447	-12.6566		-9.11362	-13.1101
170	-9.69478	-12.9292					-9.27777	-12.2988		-9.02176	-13.1137	-7
171	-9.69025	-13.3976					-9.7913	-12.9594	-7	-9.24158	-12.6831
172	-9.38218	-13.0708	-7				-9.85	-12.9241		-9.4807	-12.385
173	-9.61564	-13.1319					-9.74167	-13.0426		-9.43552	-12.363
174	-8.87288	-11.907					-9.76057	-12.9893		-9.73049	-12.6858
175	-9.12691	-12.4112					-9.64608	-12.8874		-9.55726	-12.2801
176							-9.75742	-13.171		-9.73706	-12.2483
177							-9.51689	-12.3708		-9.85233	-12.2329
178							-9.61545	-12.246	-7	-9.86117	-12.4092
179							-10.3752	-12.8915		-10.3005	-12.8717
180							-10.2599	-12.925		-9.97461	-12.5201	-7
181							-10.6742	-13.5138		-10.3255	-12.6604
182							-10.9068	-14.0429		-10.4053	-12.824
183							-10.6415	-13.8961		-10.3137	-12.8778
184							-10.4167	-13.9063		-10.2821	-12.4438
185							-10.36	-13.6668		-10.2323	-12.5632
186							-10.5314	-14.0313		-10.2776	-12.398
187							-9.90935	-13.4812		-10.2282	-12.2384
188							-9.58107	-12.7421		-10.4041	-12.3088
189							-9.45483	-11.5329	-7	-10.2096	-12.1301
190							-9.69242	-11.8923		-10.3528	-12.1361
191							-10.3124	-12.8557		-10.241	-11.9158	-7
192							-10.3485	-12.8345		-10.4669	-12.0973
193							-10.4676	-12.765		-10.476	-12.5072
194							-10.4415	-13.0162		-10.448	-12.639
195							-10.3345	-13.1005		-10.1812	-12.5645
196							-10.4032	-13.2327		-10.0863	-12.5468
197							-10.3295	-12.9117		-9.99434	-12.4754
198							-10.0925	-12.4301		-9.85475	-12.3418	-7
199							-9.77847	-11.8935	-7	-10.0062	-12.5043
200							-10.1362	-12.7958		-10.1366	-12.4179
201							-10.4692	-13.5618		-10.1857	-12.6548
202							-10.4587	-13.6224		-10.0576	-12.4084
203							-10.2523	-13.7622		-10.2158	-13.2897
204							-10.0179	-13.1717		-10.1952	-13.1145
205							-9.9432	-13.2454		-10.0286	-13.0224
206							-9.70012	-12.6381	-7	-9.95504	-12.9718
207							-10.2694	-13.2819		-9.58775	-12.2154	-7
208							-9.9991	-13.3189		-9.93562	-12.5396
209							-10.0097	-13.21		-10.149	-12.8526
210							-10.097	-13.465		-9.94928	-12.7273
211							-9.94665	-13.2254		-9.93676	-12.5929
212							-10.2279	-13.6387		-9.8995	-13.1557
213							-10.0244	-13.2057		-9.79973	-13.0495
214							-9.85558	-12.9584		-9.89111	-12.7544
215							-9.90436	-12.6945		-9.74702	-12.9879
216							-9.74017	-12.6648	-7	-9.81149	-12.7337
217							-9.77222	-12.7338		-9.86739	-12.7539
218							-9.99603	-13.0561		-9.76248	-12.8285
219							-9.71499	-12.9206		-9.79483	-12.6984
220							-9.50986	-12.857		-9.64925	-12.419
221							-9.53172	-12.9534		-9.61734	-12.4854
222							-9.33209	-12.6676	-7	-8.59933	-12.79	-7
223							-9.42673	-12.4877		-9.69602	-12.6938
224							-9.44621	-12.9178		-9.72162	-13.057
225							-9.43913	-12.977		-9.83027	-13.0407
226							-9.57743	-13.4102		-9.70679	-13.2764
227							-9.72768	-13.6278		-9.48436	-12.9793
228							-9.64941	-13.6655		-9.03562	-12.0656
229							-9.44773	-13.6258		-9.2596	-12.3879
230							-9.73004	-13.8233	-7	-9.74531	-13.3232
231							-9.83265	-14.0353		-9.39532	-13.0809
232							-9.71577	-13.7981		-9.41298	-12.9851
233							-9.93787	-14.3793		-9.4145	-12.8132	-7
234							-10.0424	-14.4784	-7	-9.47943	-12.7381
235							-9.64382	-14.1905		-9.57945	-12.6478
236							-9.45348	-13.6576		-9.68495	-13.1982	-7
237							-9.68874	-14.2979		-9.50319	-13.3059	-7
238							-9.4781	-13.8049		-9.4989	-12.8973	-7
239							-9.38769	-13.1398		-9.48171	-12.9923
240							-9.29728	-13.4032	-7	-9.43701	-12.6109
241							-9.7092	-14.2128		-9.27593	-12.6111	-7
242							-9.66774	-13.6961		-9.27056	-12.598
243							-9.6806	-14.3078		-9.22587	-12.4747
244							-9.69392	-14.0075		-9.08324	-12.283	-7
245							-9.64394	-14.0321		-9.02154	-12.2879
246							-9.87311	-14.7647		-9.0051	-12.3134
247							-9.71584	-14.3445		-8.93032	-12.1829
248							-9.55936	-14.1563		-8.9046	-11.9209
249							-9.54807	-14.2101	-7	-9.05329	-11.9489	-7
250							-9.63871	-13.7142		-9.3016	-12.3988
251							-9.57763	-13.3962		-9.06008	-12.0344	-7
252							-9.55962	-13.5062		-9.29624	-12.0744
253							-9.40383	-13.3734		-9.32642	-12.1124	-7
254							-9.43655	-13.414		-9.52761	-12.0053
255							-9.61219	-13.9714		-9.60327	-12.1052
256							-9.36834	-13.7929		-9.68449	-12.035
257							-9.26845	-13.4064	-7	-9.47925	-11.9505
258							-9.22576	-13.1911		-9.61045	-11.8602
259							-9.17868	-13.0408		-9.81593	-11.9512
260							-9.38417	-13.1682		-9.89761	-12.185
261							-9.07161	-12.7592		-9.7692	-11.8246	-7
262							-8.9748	-12.6415		-10.1244	-12.1116
263							-8.94692	-12.7013		-9.90116	-12.6998
264							-8.85894	-12.6186	-7	-9.61457	-12.2248	-7
265							-9.02844	-12.7		-9.77473	-11.8935
266							-8.90375	-12.6197		-10.0324	-12.1554
267							-8.95984	-12.553		-9.75102	-12.0054
268							-8.72516	-12.2908	-7	-9.75379	-11.7297	-7
269							-8.93881	-12.5572		-9.77415	-12.473
270							-8.86097	-12.4647		-9.88701	-12.2262
271							-8.94717	-12.6929		-9.97636	-12.629	-7
272							-8.80805	-13.014		-9.53753	-11.8862	-7
273							-8.74664	-12.9736		-9.56719	-12.1035
274							-8.67737	-12.7199	-7	-9.71345	-12.3795
275							-8.76001	-11.829		-9.78604	-12.8647
276							-9.09451	-11.988		-9.75569	-12.9213
277							-9.47611	-12.189		-9.59119	-12.7456	-7
278							-9.61887	-12.9762		-9.6705	-12.4715
279							-9.53275	-13.0464		-9.72809	-12.3849
280							-9.44048	-13.1656	-7	-9.62373	-12.2821
281							-9.70316	-13.9085		-9.49966	-12.0242	-7
282							-9.63305	-13.9665		-9.72097	-12.2762
283							-9.68592	-13.6475		-9.64607	-12.6488
284							-9.24889	-12.6759	-7	-9.67643	-12.3316
285							-9.01374	-11.8352		-9.68188	-12.485
286							-9.36547	-12.294		-9.60501	-12.6218	-7
287							-9.60029	-12.907		-9.59381	-12.3337	-7
288							-9.37662	-12.8764		-9.58731	-12.4014
289							-9.39047	-12.7585	-7	-9.73153	-12.3787
290							-9.36306	-11.5901		-9.6844	-12.5257	-7
291							-9.9696	-12.0716		-9.71377	-12.5228
292							-10.2739	-12.4498		-9.58368	-12.3221
293							-10.1087	-13.0854		-9.6398	-12.366	-7
294							-9.91155	-12.8153		-9.595	-12.5585
295							-9.76403	-12.4405	-7	-9.69211	-12.4445
296							-10.0303	-12.4441		-9.58253	-12.2005	-7
297							-10.0992	-12.7266		-9.41768	-12.1423
298							-9.86763	-12.8456		-9.54362	-12.318
299							-9.83483	-12.7331		-9.63471	-12.0914	-7
300							-9.74314	-12.5525	-7	-9.3297	-12.1579	-7
301							-9.77651	-12.4339		-9.39175	-12.2273
302							-9.8454	-12.5525		-9.24494	-12.2615
303							-9.79661	-12.8354		-9.41444	-12.1613
304							-9.92806	-12.8745		-9.29567	-12.2221
305							-9.76076	-12.6665		-9.44666	-12.182
306							-10.0643	-13.0315		-9.27871	-12.0994
307							-9.84601	-12.5245		-9.28631	-12.1827
308							-9.8304	-12.6275		-9.27266	-12.155	-7
309							-9.8968	-12.4157		-9.10623	-11.9827
310							-9.71484	-12.4261	-7	-9.15507	-12.0993
311							-9.77808	-12.3898		-9.15541	-11.9949
312							-9.77727	-12.4527		-9.20422	-12.0576	-7
313							-9.8374	-12.7551		-9.30221	-12.1771
314							-9.98187	-12.7925		-9.16491	-12.0471	-7
315							-9.935	-12.8361		-9.34031	-11.9898	-7
316							-9.79884	-12.6175
317							-9.88066	-12.7853
318							-9.95008	-12.9301
319							-9.71402	-13.0354	-7
320							-9.77479	-13.0606
321							-9.79217	-13.0716
322							-9.70652	-12.8283
323							-9.70249	-12.9339
324							-9.7404	-13.2037
325							-9.92439	-13.3905
326							-9.73629	-13.3402
327							-9.77949	-13.8017
328							-9.27233	-13.7633	-7
329							-9.77547	-13.5884
330							-9.70589	-13.52
331							-9.50202	-13.4464
332							-9.75181	-13.558
333							-9.8597	-13.6376
334							-9.61142	-13.8205
335							-9.7568	-13.9254
336							-9.5126	-13.103	-7
337							-9.60434	-12.9313
338							-9.61253	-12.8407
339							-9.54838	-12.9385
340							-9.71965	-12.9921
341							-9.6657	-13.107
342							-9.60406	-12.8423	-7
343							-9.63835	-12.855
344							-9.98176	-13.2824
345							-9.93487	-13.4918	-7
346							-10.0875	-13.5485
347							-10.3702	-14.1054
348							-10.0415	-13.5889
349							-10.0693	-13.767
350							-9.89528	-13.3225	-7
351							-9.87221	-13.4545
352							-9.52041	-12.9754
353							-9.47172	-12.7335
354							-9.41475	-12.8754
355							-9.48895	-12.8393
356							-9.37149	-12.8506
357							-9.09362	-12.7244	-7
358							-9.17116	-12.6533
359							-9.17813	-12.6431
360							-9.23876	-12.7527
361							-9.22065	-12.7495
362							-9.20829	-12.7396	-7
363							-9.39193	-12.9727
364							-9.28254	-12.8222
365							-9.08729	-12.5
366							-9.08417	-12.4696	-7
367							-9.30742	-13.1955
368							-9.44968	-13.338	-7
	-8.62747	-7.4026		-8.9858	-7.94275		-8.15146	-10.8627		-7.69666	-10.3228
	-11.1016	-14.2298		-10.6726	-14.2206		-10.9068	-14.7647		-10.8502	-13.8838

## Sheet: annual
weighted annual means, calendrically sorted
	ED-NJB-A6R		ED-NJB-A4R		ED-NJB-A2R		ED-NJB-A3R		ED-GTB-A1R		ED-GTB-A2R		ED-GJ-A1L		ED-GJ-A2R		ED-GJ-A3L		ED-GJ-D6R
	d18Owr*	d13C*	d18Owr*	d13C*	d18Owr*	d13C*	d18Owr*	d13C*	d18Owr*	d13C*	d18Owr*	d13C*	d18Owr*	d13C*	d18Owr*	d13C*	d18Owr*	d13C*	d18Owr*	d13C*
1819																			-12.258	-12.5473
1820																			-12.2086	-12.7873
1821																			-12.2639	-12.4406
1822																			-12.2591	-12.5695
1823																			-12.2839	-12.1613
1824																			-12.3014	-12.4002
1825																			-12.2558	-12.393
1826																			-12.1398	-12.2299
1827																			-11.942	-12.6312
1828																			-12.177	-12.6356
1829																			-11.9367	-12.3284
1830																			-12.0523	-12.3111
1831																			-11.8901	-11.8677
1832																			-11.9184	-12.0084
1833																			-11.8613	-12.22
1834																			-11.6785	-11.8335
1835																			-11.7423	-12.1374
1836																			-11.5551	-11.6334
1837																			-11.3481	-11.6557
1838																			-11.19	-11.5431
1839																			-11.8033	-11.8963
1840																			-11.5322	-11.8581
1841																			-11.8563	-11.9111
1842																			-11.694	-11.8095
1843																			-11.5218	-12.8479
1844																			-11.4299	-13.0172
1845																			-11.2562	-12.7187
1846																			-11.2274	-12.4672
1847																			-11.3205	-12.1648
1848																			-11.2284	-12.5822
1849																			-11.1603	-12.129
1850																			-11.375	-12.6786
1851																			-11.1952	-12.6788
1852																			-11.5541	-12.5535
1853																			-11.4336	-12.4603
1854																			-11.3948	-12.2651
1855																			-10.9369	-12.3853
1856																			-11.1653	-11.5102
1857																			-11.7387	-11.9619
1858																			-11.3311	-12.3099
1859																			-11.1851	-12.2906
1860																			-11.0544	-12.1407
1861																			-11.119	-12.2911
1862																			-11.119	-12.2911
1863																			-11.5678	-11.8235
1864																			-11.2283	-11.7392
1865																			-11.2283	-11.7392
1866																			-11.4598	-11.7494
1867																			-11.5642	-11.3713
1868																			-11.1443	-11.2432
1869																			-11.5562	-11.4269
1870																			-11.792	-11.4623
1871																			-11.5329	-11.3645
1872																			-11.3125	-11.3344
1873																			-11.3125	-11.2759
1874																			-11.1353	-11.0853
1875																			-10.9581	-10.8946
1876																			-11.3602	-11.0599
1877																			-11.2799	-11.1977
1878																			-11.0484	-11.6205
1879																			-11.0821	-11.3238
1880																			-11.0806	-11.3087
1881																			-10.9222	-11.3906
1882																			-10.6802	-11.1091
1883																			-10.8431	-11.2276
1884																			-10.7118	-11.1937
1885																			-10.7118	-11.1937
1886																			-10.7559	-11.1207
1887																			-10.7424	-11.1967
1888																			-10.7918	-11.2036
1889																			-10.6902	-11.2086
1890																			-10.6941	-10.9696
1891																			-10.8365	-11.0465
1892																			-10.9598	-11.3313
1893																			-11.0332	-11.0455
1894																			-11.0961	-11.3951
1895																			-11.2417	-11.578
1896																			-11.2461	-11.3735
1897																			-11.2891	-11.1898
1898																			-11.2482	-11.3522
1899																			-11.3547	-11.0009
1900																			-11.3816	-11.1617
1901																			-11.4073	-11.2627
1902																			-11.4408	-11.0682
1903																	-10.4789	-12.0848	-11.4342	-11.0745
1904																	-10.9429	-12.1904	-11.4275	-11.0808
1905																	-10.9519	-11.7464	-11.3468	-11.1268
1906																	-10.8768	-11.5048	-11.3468	-11.1268
1907																	-11.1227	-11.7006	-11.3586	-11.1596
1908																	-11.2702	-11.9966	-11.3586	-11.1596
1909																	-11.1941	-11.8312	-11.5128	-11.1676
1910																	-11.1455	-11.9876	-11.3995	-11.1536
1911																	-11.4073	-12.3918	-11.3995	-11.1536
1912																	-11.3268	-12.2489	-11.3995	-11.1536
1913																	-11.267	-12.1426	-11.5099	-11.1986
1914																	-11.3669	-12.1424	-11.5099	-11.1986
1915																	-11.4022	-11.6622	-11.3724	-11.2936
1916															-11.9011	-14.8467	-11.6094	-12.4669	-11.5607	-11.3607
1917															-12.2808	-15.7489	-11.689	-12.6744	-11.5621	-11.433
1918															-11.5831	-14.8627	-11.6893	-12.6095	-11.5953	-11.5518
1919															-11.0641	-14.2033	-11.6895	-12.5613	-11.2404	-11.1491
1920															-10.6932	-14.3857	-11.3995	-11.8127	-11.3285	-11.2224
1921															-10.3178	-14.3007	-11.4192	-11.5351	-11.3285	-11.2224
1922															-11.0034	-13.4311	-11.4769	-11.7483	-11.5685	-11.4285
1923															-11.462	-14.6077	-11.7224	-11.7957	-11.5383	-11.4195
1924															-11.765	-16.4561	-11.9769	-11.9906	-11.6625	-11.4853
1925															-10.9347	-14.1793	-11.5526	-11.5463	-11.3152	-11.2462
1926															-11.4139	-15.6911	-11.5715	-11.4001	-11.6586	-11.5642
1927															-11.4141	-15.4217	-11.5386	-11.3827	-11.7629	-11.5632
1928															-11.7082	-13.7758	-11.571	-11.1699	-11.4342	-11.4226
1929															-12.0479	-14.8409	-11.6105	-11.3896	-11.4699	-11.4621
1930															-11.4387	-14.0408	-11.5267	-11.5826	-11.4342	-11.6074
1931															-11.7644	-14.3471	-11.4849	-11.7534	-11.4894	-11.5772
1932															-12.1093	-14.6442	-11.5765	-11.788	-11.1298	-11.5398
1933															-11.5358	-13.2875	-11.4037	-11.4166	-11.0225	-11.5491
1934															-11.5358	-13.2875	-11.5412	-11.3992	-11.1734	-11.4971
1935															-12.0946	-14.1344	-11.7797	-11.9231	-11.0175	-11.4115
1936															-12.2168	-13.8691	-12.1327	-11.8623	-11.0875	-11.5943
1937															-11.3743	-13.5882	-11.9166	-12.6941	-11.0444	-11.6167
1938															-11.0035	-12.8495	-11.6602	-12.1921	-10.8728	-11.3852
1939															-11.3803	-13.08	-11.885	-12.286	-11.2772	-11.6068
1940															-12.0589	-13.781	-12.0523	-12.3558	-11.4995	-11.6908
1941															-11.7525	-13.9151	-11.7618	-12.3916	-11.6307	-11.7061
1942													-11.7468	-14.6894	-11.4462	-14.0493	-11.6054	-12.1322	-11.4853	-11.6824
1943													-11.2936	-14.5718	-11.6194	-12.8348	-11.1338	-11.6681	-11.3771	-11.6648
1944									-8.44066	-11.2514			-10.8405	-14.4542	-11.4115	-12.6623	-11.4844	-11.9284	-11.3023	-11.3692
1945									-8.90201	-11.5919	-8.48299	-11.5183	-11.2952	-14.4435	-11.6356	-12.6916	-11.5996	-11.9161	-11.2272	-11.4597
1946									-9.30715	-12.3203	-8.80176	-11.038	-11.5918	-13.989	-11.2689	-13.1996	-11.5996	-11.9161	-11.2673	-11.3146
1947					-10.136	-9.91345			-9.87385	-12.7152	-9.19225	-11.9896	-12.0053	-13.9811	-11.4012	-13.1179	-11.8813	-12.1001	-11.271	-11.4632
1948					-9.58652	-11.1204			-9.48626	-13.1192	-8.68945	-11.6642	-11.7072	-13.6905	-11.0027	-12.9132	-11.6961	-11.7213	-11.2146	-11.4593
1949					-9.14768	-10.1327			-9.55066	-13.1402	-8.3904	-12.0466	-11.4016	-13.445	-11.1143	-12.1264	-11.7805	-11.2384	-11.1095	-11.3846
1950					-9.15562	-10.6207			-9.75811	-12.5191	-8.45973	-11.947	-11.2806	-13.3067	-11.0678	-11.8171	-11.6506	-11.4866	-11.1345	-11.2432
1951					-9.78712	-10.1077			-9.81587	-13.26	-9.04315	-12.1562	-12.2656	-13.5308	-11.5319	-12.4455	-11.6953	-11.7621	-11.3717	-11.2375
1952					-9.2469	-9.76616			-9.57269	-13.0193	-8.93655	-12.1578	-12.0046	-13.422	-11.6183	-12.5603	-11.2965	-11.941	-11.2831	-11.043
1953					-9.44427	-10.6511			-9.69914	-13.1353	-9.43357	-12.645	-11.5845	-13.4897	-11.5031	-12.3428	-11.4458	-12.2086	-11.4053	-11.4047
1954					-9.77367	-10.7255			-9.79745	-13.4266	-9.56187	-12.6616	-11.9806	-13.4898	-11.5187	-12.1857	-11.5569	-12.4076	-11.4067	-11.5138
1955					-10.3991	-10.7166			-10.0281	-14.0611	-9.63974	-12.8834	-11.8068	-12.924	-11.6507	-12.2134	-12.0444	-12.0499	-11.4397	-11.4506
1956					-9.74544	-10.821			-9.60339	-13.7058	-9.83831	-12.7638	-11.8084	-12.9103	-11.7572	-12.5553	-11.9455	-12.1161	-11.2914	-11.5424
1957					-9.76309	-10.133			-9.55085	-13.7954	-9.93528	-12.4048	-11.3604	-13.1626	-11.6231	-12.563	-11.5874	-12.0259	-11.3736	-11.4608
1958					-10.2151	-11.1269			-9.2974	-13.0641	-9.86734	-12.5213	-11.7174	-12.7189	-11.5529	-12.2495	-11.7042	-11.9352	-11.3773	-11.3955
1959					-10.1831	-11.7082			-9.21523	-12.8902	-9.6139	-12.4754	-11.6209	-12.3844	-11.5663	-12.2595	-11.6125	-11.7824	-11.3806	-11.3985
1960					-10.0284	-12.0201			-9.05563	-12.8359	-9.32301	-12.6222	-11.7697	-12.5248	-11.5528	-12.5964	-11.6825	-12.1459	-11.2665	-11.4053
1961					-9.7131	-12.4561			-9.13558	-12.9368	-9.00419	-12.7656	-11.8022	-12.3656	-11.1105	-11.8097	-11.2117	-12.175	-11.2936	-11.1668
1962					-9.84384	-12.0712			-9.6951	-12.7664	-9.6984	-12.5345	-11.8264	-12.2472	-11.7242	-12.047	-11.2583	-11.7605	-11.5406	-11.0278
1963					-10.0479	-12.5182			-10.1486	-13.1379	-10.2637	-12.3629	-11.8264	-12.2472	-12.1941	-11.9984	-11.3528	-11.7522	-11.5757	-11.1985
1964					-10.0887	-13.0356			-10.1217	-12.5422	-10.1775	-12.3864	-11.8264	-12.2472	-11.8863	-12.2164	-11.4817	-11.4925	-11.581	-11.2268
1965					-10.0557	-13.0977			-10.054	-13.057	-9.99082	-12.6867	-11.5518	-12.5511	-11.9472	-12.3287	-11.5494	-11.6127	-11.7044	-11.3829
1966					-9.87453	-12.5085			-9.95793	-13.0739	-9.68614	-12.7151	-11.4926	-12.3393	-11.4506	-12.312	-11.712	-11.8773	-11.8241	-11.4302
1967					-9.33493	-11.6919			-9.62077	-12.8246	-9.41484	-12.8624	-11.4116	-11.9892	-11.2144	-11.8049	-11.7153	-11.9899	-11.7205	-12.3104
1968			-10.292	-8.82368	-9.44353	-11.8034			-9.54807	-13.3154	-9.50184	-12.7225	-11.7753	-11.9711	-11.5485	-12.0569	-11.7178	-11.7533	-11.5408	-12.1541
1969			-10.3804	-9.30553	-10.2669	-12.8565			-9.87046	-14.1426	-9.68495	-13.1982	-11.9838	-11.9607	-11.8634	-12.8256	-11.7913	-11.8763	-11.7227	-12.0254
1970			-10.0096	-9.4842	-10.172	-12.8065	-10.531	-13.3971	-9.54681	-13.8009	-9.50319	-13.3059	-12.0765	-12.0005	-11.3059	-12.5391	-11.7285	-11.9209	-11.4382	-12.2025
1971			-9.77081	-10.8284	-10.077	-12.7564	-10.0758	-12.1845	-9.62987	-14.1255	-9.40698	-12.7524	-11.8229	-12.109	-11.3951	-12.0037	-11.6819	-11.954	-11.1471	-12.0807
1972	-9.81402	-8.5078	-9.99938	-10.8639	-9.88712	-12.6564	-9.80114	-11.3499	-9.4678	-13.6372	-9.19925	-12.4672	-11.6804	-12.9439	-11.2631	-12.012	-11.532	-11.9202	-11.3973	-12.4398
1973	-9.81574	-8.65353	-9.79787	-10.8631	-9.94007	-12.5947	-9.67356	-11.6009	-9.08727	-12.9041	-8.99915	-12.1307	-11.5211	-12.5189	-11.3222	-12.489	-11.5572	-12.0984	-11.0954	-11.8991
1974	-10.1242	-8.83138	-9.83525	-11.6391	-10.2563	-12.8426	-10.2145	-12.8468	-8.87744	-12.5286	-9.13419	-12.1251	-11.4456	-12.3389	-11.3508	-12.3956	-11.5643	-11.9623	-11.0816	-11.8165
1975	-9.59755	-8.64828	-9.46307	-11.0683	-10.4789	-13.2088	-10.049	-11.314	-8.8006	-12.6933	-9.24243	-12.0786	-11.5173	-12.3821	-11.0859	-12.3127	-11.6394	-11.8572	-11.1155	-11.8315
1976	-9.65502	-9.26129	-9.25979	-11.9254	-10.3631	-13.0191	-9.95693	-11.2616	-9.26404	-12.6403	-9.65132	-11.9918	-11.6234	-12.5563	-11.2409	-12.2318	-12.0198	-11.4553	-11.129	-11.9226
1977	-9.98518	-8.95105	-9.77274	-11.9965	-10.0544	-12.185	-10.2456	-11.7226	-9.51475	-13.3952	-9.82269	-12.2285	-11.5213	-12.1901	-11.7106	-12.3462	-12.2054	-11.5123	-11.3206	-12.1512
1978	-10.1102	-9.54795	-10.1863	-11.722	-9.99724	-12.3729	-9.44571	-11.3579	-9.35028	-12.6077	-9.78374	-11.9812	-11.9688	-12.9457	-12.0601	-12.4314	-12.1636	-11.8085	-11.2368	-12.1829
1979	-10.3004	-10.9477	-10.3518	-13.0919	-10.2512	-12.714	-10.0128	-11.7934	-9.82945	-12.4922	-9.86367	-12.2975	-11.9204	-12.787	-11.6171	-12.0566	-12.2072	-12.0021	-11.009	-11.9515
1980	-9.83094	-10.8394	-10.0933	-12.516	-10.0843	-11.9792	-9.65668	-12.1091	-9.87237	-12.6292	-9.66048	-12.5307	-11.8502	-12.8672	-11.2876	-11.7777	-11.8987	-11.5028	-11.0141	-11.8107									8.7-12.5	11.3-13	14.7-10.8
1981	-9.58037	-9.86322	-9.60854	-11.7906	-10.0161	-11.1022	-9.6174	-11.488	-9.83345	-12.613	-9.61087	-12.3446	-11.6017	-12.7242	-11.2876	-11.7777	-11.5975	-11.8683	-11.0141	-11.8107									8.8-12.6	11.5-12	15.8-11.8
1982	-9.64386	-10.846	-9.49865	-12.3056	-9.83285	-11.6263	-9.54593	-11.8057	-9.83366	-12.7339	-9.6354	-12.4168	-11.5726	-12.6857	-10.998	-11.6235	-11.3832	-11.5922	-10.8798	-11.8764									10-11.7		12
1983	-9.52022	-11.6799	-9.55201	-12.8006	-9.63453	-11.9544	-9.46004	-12.387	-9.68889	-13.3014	-9.59859	-12.4566	-11.3712	-12.4405	-10.7825	-11.5087	-11.4752	-11.7025	-10.8798	-11.8764									12.4		12
1984	-9.63603	-12.0374	-9.69605	-12.9677	-9.81895	-12.2884	-9.72526	-12.8949	-9.63622	-13.5789	-9.65597	-12.4215	-11.3124	-12.0322	-10.98	-11.815	-11.8155	-12.1948	-10.8846	-11.9576
1985	-9.99767	-12.3157	-9.84619	-12.8022	-10.112	-12.3168	-9.92768	-11.8055	-9.61157	-12.9637	-9.65105	-12.4228	-11.3055	-12.0827	-11.127	-12.043	-11.6046	-11.9874	-10.8846	-11.9576
1986	-9.74074	-12.8489	-9.8507	-12.7623	-10.2113	-12.3735	-9.91765	-12.1602	-9.81218	-13.1661	-9.62469	-12.3698	-11.2841	-12.3036	-11.0433	-11.857	-11.3983	-11.7202	-10.8588	-12.0935
1987	-9.8123	-12.6359	-10.3252	-12.8019	-10.3106	-12.4302	-10.2177	-12.5078	-10.0515	-13.6175	-9.55673	-12.1816	-11.2682	-12.468	-11.1135	-12.3118	-11.5269	-11.8717	-10.8588	-12.0935
1988	-10.0171	-12.1658	-9.72457	-12.6022	-10.1296	-12.2146	-9.69877	-12.408	-9.47987	-12.9475	-9.32661	-12.1792	-10.9921	-12.3232	-11.1002	-11.9101	-11.6778	-12.3247	-10.8584	-12.1452
1989	-9.36136	-12.4113	-9.28194	-12.4037	-9.55763	-11.7327	-9.25024	-12.0738	-9.18891	-12.7162	-9.18241	-12.0589	-11.1915	-12.0552	-11.3506	-12.5141	-11.3104	-12.2179	-10.8584	-12.1452
1990	-9.15185	-12.1865	-9.2166	-12.724	-9.46366	-11.6953	-9.10671	-12.0665	-9.19218	-12.6689	-9.21911	-12.0909	-10.9762	-11.8323	-11.2455	-11.5828	-11.5107	-12.0066	-10.6956	-11.924
1991	-9.92855	-13.4712	-9.4058	-13.0381	-9.46366	-11.6953	-9.2877	-12.9123	-9.30268	-13.0503	-9.34031	-11.9898	-11.0561	-12.074	-11.3352	-11.5447	-11.6887	-12.4209	-10.6956	-11.924
1992	-9.24908	-12.618	-9.58273	-12.6107	-9.46366	-11.6953	-8.89956	-11.7554					-11.0212	-11.8295	-11.2584	-11.6454	-11.1829	-12.0904	-10.8462	-11.5521
1993													-11.2373	-11.9865	-11.5438	-11.7979	-11.4191	-12.2875	-10.8462	-11.5521
1994													-11.2443	-11.841			-11.6626	-11.9874	-10.829	-11.4725
1995													-11.2583	-11.8461			-11.3568	-12.0148	-10.829	-11.4725
1996													-11.5575	-11.9199			-12.0247	-12.4494	-10.7642	-10.307
1997																			-10.7642	-10.307
1998																			-10.7642	-10.307
	-9.15185	-8.5078	-9.2166	-8.82368	-9.14768	-9.76616	-8.89956	-11.2616	-8.44066	-11.2514	-8.3904	-11.038	-10.8405	-11.8295	-10.3178	-11.5087	-10.4789	-11.1699	-10.6802	-10.307
	-10.3004	-13.4712	-10.3804	-13.0919	-10.4789	-13.2088	-10.531	-13.3971	-10.1486	-14.1426	-10.2637	-13.3059	-12.2656	-14.6894	-12.2808	-16.4561	-12.2072	-12.6941	-12.3014	-13.0172
	8		8		4,6,8,16		8		8		6,8		8		4,6,8,13,27		8,10		14,25,50
		3,6		3,4,6		5,13		3.5		7,15		15		7, 40		3,6,8,15		6,8,21		8,16, 70
	a		c		e		g		i		k		m		o		q		s

## Sheet: intercorr
	ED-NJB-A6R	ED-NJB-A4R	ED-NJB-A2R	ED-NJB-A3R	ED-GTB-A1R	ED-GTB-A2R	ED-GJ-A1L	ED-GJ-A2R	ED-GJ-A3L	ED-GJ-D6R		ED-NJB-A6R	ED-NJB-A4R	ED-NJB-A2R	ED-NJB-A3R	ED-GTB-A1R	ED-GTB-A2R	ED-GJ-A1L	ED-GJ-A2R	ED-GJ-A3L	ED-GJ-D6R		ED-NJB-A6R	ED-NJB-A4R	ED-NJB-A2R	ED-NJB-A3R	ED-GTB-A1R	ED-GTB-A2R	ED-GJ-A1L	ED-GJ-A2R	ED-GJ-A3L	ED-GJ-D6R			DJFM	JJA	d18Owr* (Tw)			d18Owr* (Tw SGI)						d13C*		d13C*
yr AD	d13Cs	d13Cs	d13Cs	d13Cs	d13Cs	d13Cs	d13Cs	d13Cs	d13Cs	d13Cs	yr AD	d18OSMOW	d18OSMOW	d18OSMOW	d18OSMOW	d18OSMOW	d18OSMOW	d18OSMOW	d18OSMOW	d18OSMOW	d18OSMOW	yr AD	d18OSMOW	d18OSMOW	d18OSMOW	d18OSMOW	d18OSMOW	d18OSMOW	d18OSMOW	d18OSMOW	d18OSMOW	d18OSMOW		yr AD	wNAO	sNAO	NJB	GTB	GJ	NJB	GTB	GJ		yr AD	SGI NJB	NJB	SGI GTB	GTB	SGI GJ
1725											1725											1725												1725										1725
1726											1726											1726												1726										1726
1727											1727											1727												1727										1727
1728											1728											1728												1728										1728
1729											1729											1729												1729										1729
1730											1730											1730												1730										1730
1731											1731											1731												1731										1731
1732											1732											1732												1732										1732
1733											1733											1733												1733										1733
1734											1734											1734												1734										1734
1735											1735											1735												1735										1735
1736											1736											1736												1736										1736
1737											1737											1737												1737										1737
1738											1738											1738												1738										1738
1739											1739											1739												1739										1739
1740											1740											1740												1740										1740
1741											1741											1741												1741										1741
1742											1742											1742												1742										1742
1743											1743											1743												1743										1743
1744											1744											1744												1744										1744
1745											1745											1745												1745										1745
1746											1746											1746												1746										1746
1747											1747											1747												1747										1747
1748											1748											1748												1748										1748
1749											1749											1749												1749										1749
1750											1750											1750												1750										1750
1751											1751											1751												1751										1751
1752											1752											1752												1752										1752
1753											1753											1753												1753										1753
1754											1754											1754												1754										1754
1755											1755											1755												1755										1755
1756											1756											1756												1756										1756
1757											1757											1757												1757										1757
1758											1758											1758												1758										1758
1759											1759											1759												1759										1759
1760											1760											1760												1760										1760
1761											1761											1761												1761										1761
1762											1762											1762												1762										1762
1763											1763											1763												1763										1763
1764											1764											1764												1764										1764
1765											1765											1765												1765										1765
1766											1766											1766												1766										1766
1767											1767											1767												1767										1767
1768											1768											1768												1768										1768
1769											1769											1769												1769										1769
1770											1770											1770												1770										1770
1771											1771											1771												1771										1771
1772											1772											1772												1772										1772
1773											1773											1773												1773										1773
1774											1774											1774												1774										1774
1775											1775											1775												1775										1775
1776											1776											1776												1776										1776
1777											1777											1777												1777										1777
1778											1778											1778												1778										1778
1779											1779											1779												1779										1779
1780											1780											1780												1780										1780
1781											1781											1781												1781										1781
1782											1782											1782												1782										1782
1783											1783											1783												1783										1783
1784											1784											1784												1784										1784
1785											1785											1785												1785										1785
1786											1786											1786												1786										1786
1787											1787											1787												1787										1787
1788											1788											1788												1788										1788
1789											1789											1789												1789										1789
1790											1790											1790												1790										1790
1791											1791											1791												1791										1791
1792											1792											1792												1792										1792
1793											1793											1793												1793										1793
1794											1794											1794												1794										1794
1795											1795											1795												1795										1795
1796											1796											1796												1796										1796
1797											1797											1797												1797										1797
1798											1798											1798												1798										1798
1799											1799											1799												1799										1799
1800											1800											1800												1800										1800
1801											1801											1801												1801										1801
1802											1802											1802												1802										1802
1803											1803											1803												1803										1803
1804											1804											1804												1804										1804
1805											1805											1805												1805										1805
1806											1806											1806												1806										1806
1807											1807											1807												1807										1807
1808											1808											1808												1808										1808
1809											1809											1809												1809										1809
1810											1810											1810												1810										1810
1811											1811											1811												1811										1811
1812											1812											1812												1812										1812
1813											1813											1813												1813										1813
1814											1814											1814												1814										1814
1815											1815											1815												1815										1815
1816											1816											1816												1816										1816
1817											1817											1817												1817										1817
1818											1818											1818												1818										1818
1819										0.108278	1819											1819										-14.2935		1819								-14.2935		1819					1.50081
1820										0.80517	1820											1820										-14.6161		1820								-14.6161		1820					0.385532
1821										-0.0943379	1821											1821										-14.9271		1821								-14.9271		1821					-0.381075
1822										0.301123	1822											1822										-14.3155		1822								-14.3155		1822					1.4382
1823										-0.769095	1823											1823										-14.8799		1823								-14.8799		1823					-0.179524
1824										-0.0729316	1824											1824										-15.3405		1824								-15.3405		1824					-1.50835
1825										-0.0487579	1825											1825										-14.6247		1825								-14.6247		1825					0.501379
1826										-0.451914	1826											1826										-14.7214		1826								-14.7214		1826					-0.136373
1827										0.693171	1827											1827										-14.5014		1827								-14.5014		1827					-0.0699938
1828										0.750222	1828											1828										-14.7639		1828								-14.7639		1828					-0.15237
1829										-0.0500646	1829											1829										-14.8665		1829								-14.8665		1829					-1.18042
1830										-0.0535318	1830											1830										-14.9296		1830								-14.9296		1830					-1.02311
1831										-1.23278	1831											1831										-14.8557		1831								-14.8557		1831					-1.28775
1832										-0.801824	1832											1832										-15.0945		1832								-15.0945		1832					-1.91886
1833										-0.173265	1833											1833										-14.852		1833								-14.852		1833					-1.36289
1834										-1.19994	1834											1834										-13.6689		1834								-13.6689		1834					1.63596
1835										-0.314523	1835											1835										-14.2196		1835								-14.2196		1835					0.176149
1836										-1.67053	1836											1836										-13.4262		1836								-13.4262		1836					1.99373
1837										-1.56635	1837											1837										-13.4324		1837								-13.4324		1837					1.35442
1838										-1.83776	1838											1838										-13.5945		1838								-13.5945		1838					0.394536
1839										-0.811207	1839											1839										-14.2639		1839								-14.2639		1839					0.226367
1840										-0.87402	1840											1840										-13.9867		1840								-13.9867		1840					0.244581
1841										-0.68225	1841											1841										-14.1877		1841								-14.1877		1841					0.613809
1842										-0.921986	1842											1842										-13.8676		1842								-13.8676		1842					1.08655
1843										2.03274	1843											1843										-13.4799		1843								-13.4799		1843					1.73296
1844										2.55727	1844											1844										-14.1076		1844								-14.1076		1844					-0.424486
1845										1.76913	1845											1845										-14.1045		1845								-14.1045		1845					-0.936078
1846										1.1115	1846											1846										-13.874		1846								-13.874		1846					-0.331374
1847										0.309749	1847											1847										-13.8657		1847								-13.8657		1847					-0.0275435
1848										1.53769	1848											1848										-14.3155		1848								-14.3155		1848					-1.65221
1849										0.309425	1849											1849										-13.9444		1849								-13.9444		1849					-0.743714
1850										1.91715	1850											1850										-13.8445		1850								-13.8445		1850					0.199435
1851										1.97292	1851											1851										-13.4502		1851								-13.4502		1851					0.84276
1852										1.67336	1852											1852										-13.65		1852								-13.65		1852					1.31992
1853										1.46516	1853											1853										-13.5673		1853								-13.5673		1853					1.20649
1854										0.966321	1854											1854										-13.3413		1854								-13.3413		1854					1.76757
1855										1.36681	1855											1855										-13.5522		1855								-13.5522		1855					-0.237718
1856										-1.07563	1856											1856										-13.8833		1856								-13.8833		1856					-0.54557
1857										0.272872	1857											1857										-14.7095		1857								-14.7095		1857					-1.30349
1858										1.32921	1858											1858										-14.4066		1858								-14.4066		1858					-1.61722
1859										1.33458	1859											1859										-13.8069		1859								-13.8069		1859					-0.257188
1860										0.964436	1860										-13.6082	1860										-13.3864		1860					-13.6082			-13.3864		1860					0.812299
1861										1.45898	1861										-13.6572	1861										-13.567		1861					-13.6572			-13.567		1861					0.475355
1862										1.52113	1862										-14.0196	1862										-13.6004		1862					-14.0196			-13.6004		1862					0.108002
1863										0.230688	1863										-14.2409	1863										-14.1246		1863					-14.2409			-14.1246		1863					-0.0907398
1864										0.0467622	1864										-14.2634	1864										-13.8904		1864	-1.02				-14.2634			-13.8904		1864					-1.58273
1865										0.106562	1865										-14.2378	1865										-13.7895		1865	-1.24	0.9			-14.2378			-13.7895		1865					-0.590932
1866										0.195877	1866										-14.1306	1866										-14.1237		1866	0.54	0.2			-14.1306			-14.1237		1866					-0.712069
1867										-0.846223	1867										-14.4429	1867										-14.1903		1867	-1.38	0			-14.4429			-14.1903		1867					0.281042
1868										-1.16294	1868										-13.8532	1868										-13.5164		1868	2.81	2.8			-13.8532			-13.5164		1868					0.398832
1869										-0.569812	1869										-14.4536	1869										-14.1784		1869	1.7	-1.7			-14.4536			-14.1784		1869					-1.85314
1870										-0.409927	1870										-14.3842	1870										-14.3035		1870	-3.01	-1.3			-14.3842			-14.3035		1870					-0.693719
1871										-0.641294	1871										-14.3779	1871										-14.0639		1871	-1.01	-0.1			-14.3779			-14.0639		1871					-0.50759
1872										-0.675289	1872										-13.8944	1872										-13.8128		1872	-0.76	-2.1			-13.8944			-13.8128		1872					0.0637276
1873										-0.794218	1873										-13.814	1873										-14.1288		1873	-0.5	2.6			-13.814			-14.1288		1873					-0.988676
1874										-1.30429	1874										-13.9953	1874										-13.7419		1874	2.32	0.9			-13.9953			-13.7419		1874					-0.0864234
1875										-1.81727	1875										-13.756	1875										-13.4181		1875	-1.35	0.5			-13.756			-13.4181		1875					0.391407
1876										-1.28097	1876										-13.8577	1876										-14.1268		1876	0.21	3			-13.8577			-14.1268		1876					-0.93915
1877										-0.826195	1877										-14.2936	1877										-13.8902		1877	0.05	-2.2			-14.2936			-13.8902		1877					-0.419896
1878										0.473441	1878										-13.7078	1878										-13.4814		1878	1.46	-2.2			-13.7078			-13.4814		1878					0.584449
1879										-0.360908	1879										-13.6686	1879										-13.5059		1879	-2.22	-1.3			-13.6686			-13.5059		1879					0.339825
1880										-0.362035	1880										-13.8753	1880										-13.6836		1880	0.89	-1.9			-13.8753			-13.6836		1880					0.125155
1881										-0.0761163	1881										-13.844	1881										-13.6147		1881	-3.8	1			-13.844			-13.6147		1881					-0.379195
1882										-0.87401	1882										-13.1903	1882										-13.1031		1882	3.87	1.2			-13.1903			-13.1031		1882					-0.226809
1883										-0.482515	1883										-13.4203	1883										-13.294		1883	-0.23	-1.8			-13.4203			-13.294		1883					-0.549906
1884										-0.546987	1884										-13.395	1884										-13.2769		1884	1.44	-0.3			-13.395			-13.2769		1884					0.0575359
1885										-0.512026	1885										-13.8352	1885										-13.4166		1885	0.89	-1.3			-13.8352			-13.4166		1885					-0.271339
1886										-0.697009	1886										-13.4971	1886										-13.4831		1886	-1.12	2.3			-13.4971			-13.4831		1886					-0.48701
1887										-0.438425	1887										-13.6587	1887										-13.4535		1887	0.45	-2.4			-13.6587			-13.4535		1887					-0.390803
1888										-0.388139	1888										-13.8034	1888										-13.3999		1888	-2.75	-2			-13.8034			-13.3999		1888					-0.404496
1889										-0.345242	1889										-13.4302	1889										-13.2568		1889	-0.1	0.3			-13.4302			-13.2568		1889					-0.374973
1890										-1.03705	1890										-13.551	1890										-13.3681		1890	1.78	2			-13.551			-13.3681		1890					0.322054
1891										-0.782196	1891										-13.7097	1891										-13.5723		1891	-0.82	-3.3			-13.7097			-13.5723		1891					1.35876
1892										0.095894	1892										-13.9909	1892										-13.4869		1892	-2.02	-1.1			-13.9909			-13.4869		1892					1.48459
1893										-0.743078	1893										-14.0019	1893										-13.5356		1893	-1.07	-2.8			-14.0019			-13.5356		1893					-0.296135
1894										0.327641	1894										-13.7162	1894										-13.4914		1894	2.68	2.2			-13.7162			-13.4914		1894					0.423508
1895										0.895627	1895										-13.9397	1895										-13.3201		1895	-3.97	-0.4			-13.9397			-13.3201		1895					1.0717
1896										0.294954	1896										-13.9339	1896										-13.6476		1896	1.12	0.7			-13.9339			-13.6476		1896					0.531343
1897										-0.245304	1897										-13.9154	1897										-13.6891		1897	1.09	-1.2			-13.9154			-13.6891		1897					0.875544
1898										0.255986	1898										-14.0411	1898										-13.7612		1898	1.02	-0.9			-14.0411			-13.7612		1898					-0.33291
1899										-0.793817	1899										-14.2379	1899										-13.8422		1899	0.03	0.5			-14.2379			-13.8422		1899					-0.489794
1900										-0.300626	1900										-14.3116	1900										-14.0529		1900	-2.13	-0.6			-14.3116			-14.0529		1900					-0.447511
1901										0.0105392	1901										-13.6882	1901										-13.8762		1901	-0.33	2			-13.6882			-13.8762		1901					-0.199368
1902										-0.571796	1902										-14.5692	1902										-14.1371		1902	-1.41	-4.2			-14.5692			-14.1371		1902					-0.109112
1903									0.38472	-0.549898	1903									-13.4582	-14.4135	1903									-12.9856	-13.9409		1903	3.89	-1.9			-13.9359			-13.4632		1903					0.143346
1904									0.719718	-0.529622	1904									-13.85	-14.3346	1904									-13.591	-14.0757		1904	0.23	-2			-14.0923			-13.8334		1904					-0.968691
1905									-0.651672	-0.390766	1905									-13.7778	-14.1726	1905									-13.5567	-13.9515		1905	1.98	0.2			-13.9752			-13.7541		1905					-0.173365
1906									-1.39519	-0.392568	1906									-13.5988	-14.0688	1906									-13.3455	-13.8154		1906	2.06	-0.5			-13.8338			-13.5804		1906					-0.0414553
1907									-0.77997	-0.297077	1907									-14.0136	-14.2494	1907									-13.6496	-13.8854		1907	2.06	-1			-14.1315			-13.7675		1907					0.237606
1908									0.146753	-0.301877	1908									-14.0031	-14.0915	1908									-13.8802	-13.9686		1908	1.44	0.2			-14.0473			-13.9244		1908					-0.15709
1909									-0.360188	-0.283806	1909									-13.928	-14.2468	1909									-13.8446	-14.1633		1909	0	2.1			-14.0874			-14.004		1909					-0.553386
1910									0.133268	-0.333602	1910									-13.8434	-14.0974	1910									-13.7504	-14.0044		1910	2.1	-0.8			-13.9704			-13.8774		1910					0.121789
1911									1.39707	-0.342505	1911									-14.0736	-14.0658	1911									-14.0305	-14.0227		1911	0.29	-1.3			-14.0697			-14.0266		1911					-0.415756
1912									0.960273	-0.352659	1912									-13.9086	-13.9812	1912									-13.7421	-13.8147		1912	0.24	-1.1			-13.9449			-13.7784		1912					-0.138727
1913									0.637113	-0.228502	1913									-13.9113	-14.1542	1913									-13.8369	-14.0798		1913	2.69	0.9			-14.0327			-13.9583		1913					-0.0641584
1914									0.643836	-0.24102	1914									-13.9216	-14.0646	1914									-13.6996	-13.8426		1914	1.48	1.4			-13.9931			-13.7711		1914					0.17402
1915									-0.843011	0.0313249	1915									-14.3667	-14.337	1915									-13.9559	-13.9261		1915	-0.2	-2.7			-14.3519			-13.941		1915					-0.0491441
1916								-0.479802	1.66868	0.218665	1916								-14.7324	-14.4407	-14.392	1916								-14.3275	-14.0357	-13.9871		1916	-0.69	-1.7			-14.5217			-14.1168		1916					0.593078
1917								1.32685	2.32226	0.420473	1917								-14.842	-14.2502	-14.1233	1917								-14.6633	-14.0715	-13.9446		1917	-3.8	-0.8			-14.4052			-14.2265		1917					0.379867
1918								-0.215198	2.12804	0.761119	1918								-14.3571	-14.4633	-14.3693	1918								-13.8729	-13.979	-13.885		1918	-0.8	0.1			-14.3966			-13.9123		1918					0.714888
1919								-1.34185	1.98544	-0.466925	1919								-13.716	-14.3414	-13.8923	1919								-13.4019	-14.0273	-13.5781		1919	-0.8	1.6			-13.9832			-13.6691		1919					0.00717368
1920								-0.881561	-0.338332	-0.264415	1920								-13.3545	-14.0608	-13.9898	1920								-13.2832	-13.9895	-13.9185		1920	3.18	0.8			-13.8017			-13.7304		1920					-0.37997
1921								-0.926724	-1.19615	-0.282948	1921								-13.2293	-14.3307	-14.24	1921								-12.814	-13.9155	-13.8248		1921	1.63	-0.7			-13.9333			-13.5181		1921					0.502245
1922								-2.47325	-0.525167	0.316394	1922								-13.7532	-14.2267	-14.3183	1922								-13.5619	-14.0355	-14.127		1922	1.85	3.3			-14.0994			-13.9081		1922					-0.484284
1923								-0.0999319	-0.370783	0.269327	1923								-14.4875	-14.7479	-14.5638	1923								-14.132	-14.3923	-14.2083		1923	1.73	1.7			-14.5997			-14.2442		1923					-0.0196186
1924								3.59276	0.243048	0.445961	1924								-14.3607	-14.5726	-14.2582	1924								-14.1246	-14.3365	-14.0221		1924	-1.13	1.6			-14.3972			-14.1611		1924					-0.00515058
1925								-0.676722	-1.13577	-0.291235	1925								-13.4965	-14.1144	-13.877	1925								-13.4064	-14.0243	-13.787		1925	2.39	2.4			-13.8293			-13.7392		1925					-0.790999
1926								2.3985	-1.58578	0.63989	1926								-14.1031	-14.2607	-14.3478	1926								-14.0672	-14.2248	-14.3119		1926	0.11	-0.2			-14.2372			-14.2013		1926					-0.591138
1927								2.0203	-1.63478	0.615008	1927								-14.0848	-14.2093	-14.4335	1927								-14.0078	-14.1323	-14.3566		1927	1.72	-0.1			-14.2425			-14.1656		1927					-0.721679
1928								-1.06597	-2.29357	0.17269	1928								-14.7203	-14.5832	-14.4464	1928								-14.4379	-14.3007	-14.1639		1928	0.63	-1.9			-14.5833			-14.3008		1928					-0.138049
1929								1.18165	-1.60382	0.268543	1929								-14.9515	-14.5141	-14.3735	1929								-14.7529	-14.3155	-14.1749		1929	-1.03	-0.4			-14.613			-14.4145		1929					0.387892
1930								-0.252591	-0.997564	0.680272	1930								-13.8639	-13.9519	-13.8594	1930								-13.9511	-14.0391	-13.9466		1930	0.91	1.4			-13.8917			-13.9789		1930					0.11501
1931								0.512459	-0.46106	0.567633	1931								-14.6886	-14.4091	-14.4136	1931								-14.4086	-14.1292	-14.1337		1931	-0.16	-1.1			-14.5038			-14.2238		1931					0.0823113
1932								1.26998	-0.349415	0.433476	1932								-14.9015	-14.3687	-13.922	1932								-14.6874	-14.1546	-13.7079		1932	-0.5	0.8			-14.3974			-14.1833		1932					-0.90866
1933								-1.30582	-1.5052	0.438523	1933								-13.9369	-13.8048	-13.4236	1933								-13.8795	-13.7474	-13.3662		1933	0.25	3.1			-13.7217			-13.6644		1933					-0.302243
1934								-1.15134	-1.55695	0.261113	1934								-13.8581	-13.8635	-13.4956	1934								-13.8138	-13.8192	-13.4513		1934	0.86	0.2			-13.7391			-13.6948		1934					0.231384
1935								0.737451	0.0805771	-0.0161632	1935								-14.9264	-14.6115	-13.8493	1935								-14.5396	-14.2248	-13.4626		1935	0.97	3.2			-14.4624			-14.0756		1935					0.754417
1936								0.360446	-0.10715	0.505304	1936								-14.7229	-14.6387	-13.5936	1936								-14.5156	-14.4315	-13.3863		1936	-3.89	1.8			-14.3184			-14.1111		1936					0.599208
1937								-0.053519	2.49102	0.549229	1937								-13.6266	-14.1689	-13.2967	1937								-13.4488	-13.9911	-13.1189		1937	0.72	0.4			-13.6974			-13.5196		1937					1.16835
1938								-1.42626	0.926244	-0.160814	1938								-13.4871	-14.1437	-13.3563	1938								-13.4418	-14.0984	-13.311		1938	1.79	2.3			-13.6624			-13.6171		1938					0.245923
1939								-0.787196	1.2208	0.474875	1939								-14.0049	-14.5097	-13.9019	1939								-13.8541	-14.3588	-13.751		1939	0.37	0.1			-14.1388			-13.988		1939					-0.698888
1940								0.848323	1.44018	0.701751	1940								-14.6985	-14.6919	-14.1391	1940								-14.6435	-14.6369	-14.0841		1940	-2.86	1.5			-14.5098			-14.4548		1940					-0.038264
1941								1.30051	1.55303	0.724473	1941								-14.4774	-14.4867	-14.3555	1941								-14.2308	-14.2401	-14.1089		1941	-2.31	1			-14.4399			-14.1932		1941					-0.365753
1942							0.382385	1.75577	0.744236	0.631991	1942							-14.557	-14.2564	-14.4156	-14.2954	1942							-14.1968	-13.8963	-14.0554	-13.9353		1942	-0.55	0.5			-14.3811			-14.0209		1942					0.435818
1943							0.420983	-0.675591	-0.703463	0.557626	1943							-13.9026	-14.2284	-13.7428	-13.986	1943							-13.7802	-14.106	-13.6203	-13.8636		1943	1.48	-0.2			-13.965			-13.8425		1943			0.253223		0.546057
1944					-1.64516		0.459798	-0.893207	0.109743	-0.339084	1944					-11.1643		-13.5642	-14.1352	-14.2081	-14.026	1944					-10.8935		-13.2934	-13.8644	-13.9372	-13.7552		1944	0.61	-0.7		-11.1643	-13.9834		-10.8935	-13.7125		1944			0.143491	-1.64516	1.27883
1945					-1.24464	-0.450378	0.858515	-0.680347	0.0718267	-0.0930114	1945					-11.5013	-11.0823	-13.8944	-14.2349	-14.1989	-13.8265	1945					-11.3359	-10.9169	-13.7291	-14.0696	-14.0336	-13.6612		1945	1.64	1		-11.2918	-14.0387		-11.1264	-13.8734		1945			0.324058	-0.847511	0.204701
1946					0.153205	-2.70986	-0.248922	0.572465	0.0720832	-0.543462	1946					-11.8578	-11.3525	-14.1425	-13.8196	-14.1503	-13.818	1946					-11.6961	-11.1908	-13.9808	-13.6579	-13.9886	-13.6563		1946	0.27	3.5		-11.6051	-13.9826		-11.4434	-13.8209		1946	0.513075		0.392417	-1.27833	0.222821
1947			-0.189448		0.681891	0.718646	0.152894	0.542283	0.646444	-0.126012	1947			-12.4886		-12.2265	-11.5449	-14.3579	-13.7538	-14.2339	-13.6236	1947			-12.3852		-12.1231	-11.4415	-14.2545	-13.6505	-14.1305	-13.5202		1947	-2.71	0.2	-12.4886	-11.8857	-13.9923	-12.3852	-11.7823	-13.8889		1947	0.524641	-0.189448	0.713184	0.700268	0.418002
1948			2.41697		1.25321	-0.904445	-0.424774	0.234939	-0.536336	-0.159024	1948			-12.3471		-12.2469	-11.45	-14.4678	-13.7633	-14.4567	-13.9752	1948			-12.1144		-12.0142	-11.2174	-14.2351	-13.5306	-14.2241	-13.7425		1948	1.34	-0.6	-12.3471	-11.8485	-14.1658	-12.1144	-11.6158	-13.9331		1948	-2.16399	2.41697	-0.963958	0.174384	0.894707
1949			-0.242356		0.905027	0.256189	-0.864009	-1.36857	-2.0443	-0.400797	1949			-11.8007		-12.2037	-11.0434	-14.0546	-13.7673	-14.4335	-13.7625	1949			-11.838		-12.241	-11.0807	-14.0919	-13.8046	-14.4709	-13.7998		1949	1.87	-1.9	-11.8007	-11.6235	-14.0045	-11.838	-11.6609	-14.0418		1949	-0.0501938	-0.242356	-1.63203	0.580608	-0.152886
1950			0.616423		-0.962234	-0.452235	-0.943136	-1.9341	-1.27015	-0.839137	1950			-11.7224		-12.3249	-11.0265	-13.8474	-13.6346	-14.2174	-13.7013	1950			-11.7349		-12.3374	-11.039	-13.8599	-13.6471	-14.2299	-13.7138		1950	1.4	0.7	-11.7224	-11.6757	-13.8502	-11.7349	-11.6882	-13.8626		1950	0.120265	0.616423	0.363837	-0.707234	-0.847842
1951			-0.866514		0.560443	0.0464009	0.253946	-0.420907	-0.410982	-0.877064	1951			-12.5158		-12.5445	-11.7718	-14.9943	-14.2605	-14.424	-14.1003	1951			-12.4454		-12.4741	-11.7014	-14.9239	-14.1901	-14.3536	-14.0299		1951	-1.26	-0.5	-12.5158	-12.1582	-14.4448	-12.4454	-12.0878	-14.3744		1951	-0.168154	-0.866514	0.687277	0.303422	-0.760037
1952			-1.92835		-0.260258	-0.237008	0.265574	-0.0529081	0.146467	-1.47064	1952			-12.2284		-12.5542	-11.918	-14.9861	-14.5998	-14.278	-14.2646	1952			-11.8851		-12.2109	-11.5748	-14.6429	-14.2566	-13.9347	-13.9213		1952	0.83	0	-12.2284	-12.2361	-14.5321	-11.8851	-11.8928	-14.1889		1952	0.829967	-1.92835	0.0417282	-0.248633	-0.630049
1953			-0.200269		-0.166016	1.34434	0.90407	-0.436673	0.980262	-0.427609	1953			-11.8697		-12.1246	-11.859	-14.01	-13.9285	-13.8713	-13.8308	1953			-11.9911		-12.2459	-11.9803	-14.1313	-14.0499	-13.9926	-13.9521		1953	0.18	2.8	-11.8697	-11.9918	-13.9101	-11.9911	-12.1131	-14.0315		1953	0.245031	-0.200269	0.300054	0.58916	-0.781217
1954			-0.330923		0.396768	1.15604	1.2939	-0.694792	1.59996	-0.128042	1954			-12.4347		-12.4584	-12.2229	-14.6416	-14.1797	-14.2179	-14.0677	1954			-12.4191		-12.4429	-12.2073	-14.626	-14.1641	-14.2023	-14.0521		1954	0.13	2	-12.4347	-12.3406	-14.2767	-12.4191	-12.3251	-14.2611		1954	-0.01625	-0.330923	-0.180036	0.776403	-0.542822
1955			-0.648456		1.82744	1.76564	-0.403089	-0.544242	0.481664	-0.335397	1955			-13.0584		-12.6874	-12.299	-14.4661	-14.31	-14.7037	-14.099	1955			-13.027		-12.656	-12.2676	-14.4347	-14.2786	-14.6723	-14.0676		1955	-2.54	1.2	-13.0584	-12.4932	-14.3947	-13.027	-12.4618	-14.3633		1955	1.28098	-0.648456	-0.729337	1.79654	-0.490771
1956			-0.71736		0.955236	1.12058	-0.09921	0.312855	0.686161	-0.0870694	1956			-12.5516		-12.4096	-12.6445	-14.6146	-14.5634	-14.7517	-14.0976	1956			-12.4339		-12.2919	-12.5268	-14.4969	-14.4457	-14.634	-13.9799		1956	-1.73	-0.5	-12.5516	-12.5271	-14.5068	-12.4339	-12.4094	-14.3891		1956	1.03845	-0.71736	-0.850918	1.03791	0.212327
1957			-2.49142		1.18993	-0.386364	1.18218	0.407413	0.402212	-0.347591	1957			-12.6227		-12.4105	-12.7949	-14.2201	-14.4827	-14.447	-14.2332	1957			-12.5017		-12.2894	-12.6738	-14.099	-14.3616	-14.326	-14.1121		1957	1.52	-2.2	-12.6227	-12.6027	-14.3458	-12.5017	-12.4816	-14.2247		1957	-0.180935	-2.49142	-0.560241	0.401784	-0.0999635
1958			-0.653724		-0.497658	-0.0932754	-0.15192	-0.236657	0.116712	-0.560216	1958			-12.8989		-11.9812	-12.5511	-14.4012	-14.2367	-14.388	-14.0611	1958			-12.9087		-11.9909	-12.5609	-14.4109	-14.2465	-14.3978	-14.0709		1958	-1.02	-2.4	-12.8989	-12.2662	-14.2718	-12.9087	-12.2759	-14.2815		1958	-0.562061	-0.653724	-1.16641	-0.295466	-0.250992
1959			0.276987		-0.84386	-0.381362	-1.11557	-0.150951	-0.362679	-0.571858	1959			-12.79		-11.8222	-12.2209	-14.2279	-14.1732	-14.2195	-13.9875	1959			-12.7173		-11.7495	-12.1481	-14.1551	-14.1005	-14.1468	-13.9148		1959	-0.37	1.5	-12.79	-12.0215	-14.152	-12.7173	-11.9488	-14.0793		1959	-0.140973	0.276987	0.617173	-0.612611	0.125298
1960			0.635424		-0.904775	0.0647442	-0.314521	0.678095	0.76835	-0.572339	1960			-12.615		-11.6422	-11.9096	-14.3563	-14.1394	-14.2691	-13.8531	1960			-12.3861		-11.4133	-11.6807	-14.1273	-13.9104	-14.0402	-13.6242		1960	-1.54	-0.6	-12.615	-11.7759	-14.1545	-12.3861	-11.547	-13.9255		1960	-0.399683	0.635424	1.47374	-0.420015	0.697108
1961			1.25323		-0.604816	0.516532	-0.677838	-1.07356	0.855845	-1.29022	1961			-12.2394		-11.6619	-11.5305	-14.3285	-13.6369	-13.738	-13.8199	1961			-12.2649		-11.6874	-11.556	-14.354	-13.6623	-13.7635	-13.8453		1961	1.8	2.7	-12.2394	-11.5962	-13.8808	-12.2649	-11.6217	-13.9063		1961	-0.456936	1.25323	-0.178709	-0.0441419	0.305595
1962			0.211218		-0.974808	-0.395153	-0.919782	-0.483121	-0.440804	-1.71603	1962			-12.7887		-12.64	-12.6433	-14.7712	-14.6691	-14.2031	-14.4854	1962			-12.5643		-12.4155	-12.4188	-14.5468	-14.4446	-13.9787	-14.261		1962	-2.38	-0.9	-12.7887	-12.6416	-14.5322	-12.5643	-12.4172	-14.3078		1962	-0.711521	0.211218	0.0105574	-0.68498	-0.056409
1963			0.880956		-0.0658528	-1.06856	-0.740255	-0.553826	-0.470484	-1.23566	1963			-12.5946		-12.6953	-12.8104	-14.3731	-14.7408	-13.8995	-14.1224	1963			-12.5231		-12.6239	-12.739	-14.3016	-14.6694	-13.8281	-14.051		1963	-3.6	-1.9	-12.5946	-12.7529	-14.284	-12.5231	-12.6814	-14.2125		1963	0.264548	0.880956	0.724878	-0.567205	0.476837
1964			1.70272		-1.50536	-1.00687	-0.592049	-0.0144621	-1.28458	-1.17109	1964			-13.0018		-13.0348	-13.0906	-14.7395	-14.7994	-14.3948	-14.4941	1964			-12.8124		-12.8453	-12.9012	-14.55	-14.61	-14.2053	-14.3046		1964	-2.86	-0.8	-13.0018	-13.0627	-14.6069	-12.8124	-12.8732	-14.4175		1964	-0.449624	1.70272	-0.104974	-1.25611	0.164525
1965			1.63694		-0.297684	0.0902264	0.701131	0.278756	-0.91412	-0.732815	1965			-12.7777		-12.776	-12.7128	-14.2738	-14.6692	-14.2714	-14.4263	1965			-12.6209		-12.6191	-12.5559	-14.117	-14.5124	-14.1145	-14.2695		1965	-2.88	0.5	-12.7777	-12.7444	-14.4102	-12.6209	-12.5875	-14.2533		1965	-0.234206	1.63694	0.52785	-0.103729	0.0921236
1966			0.317641		-0.301529	0.202829	-0.0317412	0.271296	-0.0939978	-0.612198	1966			-12.5959		-12.6793	-12.4076	-14.214	-14.172	-14.4334	-14.5455	1966			-12.4272		-12.5106	-12.2388	-14.0453	-14.0033	-14.2647	-14.3768		1966	-1.69	-0.6	-12.5959	-12.5434	-14.3412	-12.4272	-12.3747	-14.1725		1966	-1.19303	0.317641	0.0270694	-0.0493499	0.346505
1967			-1.40823		-0.94812	0.771914	-1.33405	-0.872369	0.251723	1.93941	1967			-11.9946		-12.2805	-12.0745	-14.0713	-13.8741	-14.375	-14.3802	1967			-11.9012		-12.187	-11.9811	-13.9778	-13.7806	-14.2816	-14.2867		1967	1.28	1.1	-11.9946	-12.1775	-14.1751	-11.9012	-12.084	-14.0817		1967	0.0441788	-1.40823	-0.139831	-0.0881029	-0.10154
1968		-1.88837	-1.291		0.183011	0.301903	-1.37839	-0.262754	-0.491394	1.46694	1968		-13.17	-12.3216		-12.4261	-12.3799	-14.6533	-14.4266	-14.5958	-14.4189	1968		-12.8456	-11.9971		-12.1016	-12.0554	-14.3288	-14.1021	-14.2713	-14.0944		1968	-1.04	-2.1	-12.7458	-12.403	-14.5236	-12.4213	-12.0785	-14.1991		1968	0.383948	-1.58968	0.437312	0.242457	-0.500749
1969		-1.28671	0.670969		2.13738	2.1235	-1.41976	1.54395	-0.114049	1.07659	1969		-12.8494	-12.7359		-12.3395	-12.154	-14.4528	-14.3325	-14.2603	-14.1917	1969		-12.9016	-12.7881		-12.3917	-12.2062	-14.5051	-14.3847	-14.3125	-14.2439		1969	-4.89	0.3	-12.7927	-12.2467	-14.3093	-12.8449	-12.299	-14.3615		1969	1.196	-0.307871	-0.150521	2.13044	-0.493702
1970		-1.59907	0.508332	2.35022	1.33441	2.6082	-1.28988	0.90674	0.0185423	1.57854	1970		-12.5407	-12.7031	-13.0622	-12.078	-12.0344	-14.6077	-13.8371	-14.2597	-13.9693	1970		-12.6356	-12.798	-13.1571	-12.1729	-12.1292	-14.7026	-13.932	-14.3546	-14.0642		1970	-1.89	-0.1	-12.7687	-12.0562	-14.1685	-12.8636	-12.151	-14.2633		1970	0.631475	0.419827	-1.19331	1.9713	-0.989603
1971		1.4204	0.368067	0.284074	2.16743	0.660215	-0.912632	-0.308999	0.115149	1.21123	1971		-12.5783	-12.8845	-12.8833	-12.4374	-12.2145	-14.6304	-14.2025	-14.4894	-13.9546	1971		-12.4412	-12.7474	-12.7462	-12.3003	-12.0774	-14.4933	-14.0655	-14.3523	-13.8175		1971	-0.96	-0.9	-12.782	-12.3259	-14.3192	-12.6449	-12.1888	-14.1821		1971	-0.178821	0.690847	0.94725	1.41382	-0.633796
1972	0.535874	0.695793	0.152879	-1.134	1.09214	-0.288392	2.26502	-0.263145	0.0025561	2.24523	1972		-12.5297	-12.4174	-12.3315	-11.9981	-11.7296	-14.2108	-13.7934	-14.0623	-13.9276	1972		-12.439	-12.3267	-12.2408	-11.9074	-11.6389	-14.1201	-13.7027	-13.9716	-13.8369		1972	0.34	1.6	-12.4262	-11.8638	-13.9985	-12.3355	-11.7731	-13.9078		1972	0.112223	0.0626361	1.2062	0.401872	-0.0270488
1973	0.307078	-0.0551002	0.0325386	-0.675269	-0.553513	-1.42807	0.553891	0.873691	0.550128	0.661106	1973	-12.5401	-12.5223	-12.6645	-12.398	-11.8117	-11.7236	-14.2455	-14.0466	-14.2816	-13.8198	1973	-12.4001	-12.3822	-12.5244	-12.2579	-11.6716	-11.5835	-14.1055	-13.9066	-14.1415	-13.6798		1973	2.52	1.7	-12.5312	-11.7676	-14.0984	-12.3912	-11.6276	-13.9583		1973	-0.633398	-0.0976882	0.639737	-0.990792	-0.202107
1974	0.164363	1.30785	0.529181	1.50862	-1.33813	-1.33776	-0.207173	0.686538	0.118529	0.4126	1974	-12.7067	-12.4177	-12.8388	-12.797	-11.4599	-11.7167	-14.0281	-13.9333	-14.1468	-13.6641	1974	-12.6577	-12.3687	-12.7898	-12.748	-11.4109	-11.6677	-13.9791	-13.8843	-14.0978	-13.6151		1974	1.23	-0.1	-12.69	-11.5883	-13.9431	-12.641	-11.5393	-13.8941		1974	-0.147211	0.877505	-0.221739	-1.33795	0.072977
1975	-0.993628	-0.803141	1.27477	-1.13795	-0.822798	-1.405	-0.102094	0.52502	-0.217039	0.449141	1975	-12.3389	-12.2044	-13.2203	-12.7904	-11.542	-11.9838	-14.2587	-13.8273	-14.3807	-13.8569	1975	-12.1775	-12.043	-13.0588	-12.6289	-11.3805	-11.8223	-14.0972	-13.6658	-14.2193	-13.6954		1975	1.63	-0.9	-12.6385	-11.7629	-14.0809	-12.4771	-11.6014	-13.9194		1975	-0.362033	-0.414988	0.0977797	-1.1139	-0.347169
1976	-0.0318215	0.814043	0.963887	-1.21925	-0.84979	-1.63118	0.516149	0.36975	-1.4764	0.708773	1976	-12.4748	-12.0795	-13.1829	-12.7767	-12.0838	-12.4711	-14.4431	-14.0607	-14.8395	-13.9487	1976	-12.2677	-11.8725	-12.9759	-12.5697	-11.8768	-12.264	-14.2361	-13.8536	-14.6325	-13.7417		1976	1.37	-2.1	-12.6285	-12.2774	-14.323	-12.4214	-12.0704	-14.116		1976	-1.39925	0.131715	0.637017	-1.24049	0.313261
1977	-1.56729	0.477146	-0.585924	-0.413914	1.07688	-0.650814	-0.935616	0.672123	-1.30778	1.36983	1977	-12.822	-12.6096	-12.8913	-13.0824	-12.3516	-12.6595	-14.3582	-14.5475	-15.0423	-14.1574	1977	-12.5853	-12.3728	-12.6545	-12.8456	-12.1148	-12.4228	-14.1214	-14.3107	-14.8055	-13.9207		1977	-2.14	-1	-12.8513	-12.5056	-14.5263	-12.6146	-12.2688	-14.2896		1977	-0.843937	-0.522496	-1.12201	0.213033	0.366924
1978	-0.80752	-0.64046	-0.141622	-1.05063	-0.787632	-1.49808	1.94886	0.908388	-0.395355	1.45938	1978	-12.8782	-12.9543	-12.7653	-12.2137	-12.1183	-12.5517	-14.7368	-14.8281	-14.9316	-14.0048	1978	-12.4988	-12.5749	-12.3858	-11.8342	-11.7388	-12.1723	-14.3573	-14.4486	-14.5521	-13.6253		1978	0.17	-1.4	-12.7029	-12.335	-14.6253	-12.3234	-11.9555	-14.2458		1978	0.257675	-0.660057	-1.01271	-1.14285	0.988629
1979	1.80632	2.28323	0.61356	-0.302042	-1.03746	-0.229433	1.33486	0.0693294	0.19693	0.785436	1979	-12.9987	-13.0501	-12.9495	-12.7111	-12.5278	-12.562	-14.6187	-14.3155	-14.9055	-13.7073	1979	-12.6401	-12.6915	-12.5909	-12.3525	-12.1692	-12.2034	-14.2601	-13.9569	-14.5469	-13.3487		1979	-2.25	0.6	-12.9273	-12.5449	-14.3867	-12.5687	-12.1863	-14.0281		1979	0.964162	1.10027	-0.932939	-0.633445	0.666893
1980	0.728881	0.559365	-0.734246	0.232385	-0.696888	0.724027	1.66623	-0.54598	-1.36553	0.376337	1980	-12.2783	-12.5407	-12.5317	-12.1041	-12.3197	-12.1079	-14.2976	-13.735	-14.3461	-13.4615	1980	-12.2527	-12.515	-12.506	-12.0784	-12.2941	-12.0822	-14.272	-13.7093	-14.3205	-13.4359		1980	0.56	-1.1	-12.3637	-12.2138	-13.9601	-12.338	-12.1882	-13.9344		1980	0.676732	0.196596	-0.135469	0.0135694	-0.502461
1981	-2.25088	-1.43292	-2.37157	-0.863913	-0.757787	0.0909654	1.16472	-0.507516	-0.239682	0.378211	1981	-12.3331	-12.3613	-12.7688	-12.3702	-12.5862	-12.3636	-14.3545	-14.0404	-14.3503	-13.7669	1981	-12.1623	-12.1905	-12.598	-12.1994	-12.4154	-12.1928	-14.1837	-13.8696	-14.1795	-13.5961		1981	2.05	-0.1	-12.4584	-12.4749	-14.128	-12.2876	-12.3041	-13.9572		1981	-0.0537035	-1.72982	-0.70279	-0.333411	-0.313
1982	-0.751609	-0.448047	-1.24854	-0.333374	-0.502379	0.434656	1.09219	-0.831653	-1.10826	0.57245	1982	-12.4358	-12.2906	-12.6248	-12.3379	-12.6256	-12.4273	-14.3645	-13.7899	-14.1751	-13.6717	1982	-12.2843	-12.1391	-12.4733	-12.1864	-12.4741	-12.2759	-14.2131	-13.6385	-14.0237	-13.5202		1982	0.8	-0.8	-12.4223	-12.5265	-14.0003	-12.2708	-12.375	-13.8489		1982	-0.0501134	-0.695391	0.134207	-0.0338613	1.05666
1983	0.361639	0.515448	-0.508031	0.650997	0.833844	0.658109	0.245908	-1.06373	-0.776406	0.577121	1983	-12.2515	-12.2833	-12.3658	-12.1913	-12.4201	-12.3298	-14.1025	-13.5138	-14.2064	-13.611	1983	-12.0554	-12.0872	-12.1697	-11.9952	-12.2241	-12.1338	-13.9064	-13.3177	-14.0104	-13.415		1983	3.42	0.9	-12.2729	-12.375	-13.8584	-12.0769	-12.1789	-13.6624		1983	0.527616	0.255013	-0.903677	0.745976	0.873312
1984	0.48267	0.748893	0.249481	1.50648	1.46129	0.600737	-1.21448	-0.30324	0.741493	0.819586	1984	-12.3432	-12.4032	-12.5261	-12.4324	-12.3434	-12.3631	-14.0195	-13.6872	-14.5226	-13.5918	1984	-12.2816	-12.3416	-12.4645	-12.3709	-12.2818	-12.3016	-13.958	-13.6256	-14.4611	-13.5302		1984	1.6	-0.3	-12.4262	-12.3533	-13.9553	-12.3647	-12.2917	-13.8937		1984	0.885548	0.746882	-1.66286	1.03101	0.195608
1985	0.529548	0.25121	0.401095	-0.398789	-0.07621	0.685539	-0.87795	0.274162	0.0854964	0.826948	1985	-12.7201	-12.5686	-12.8344	-12.6501	-12.334	-12.3735	-14.0279	-13.8494	-14.327	-13.607	1985	-12.5159	-12.3644	-12.6302	-12.4459	-12.1298	-12.1693	-13.8238	-13.6452	-14.1228	-13.4028		1985	-0.63	-0.3	-12.6933	-12.3537	-13.9528	-12.4891	-12.1495	-13.7487		1985	0.154674	0.195766	2.01666	0.304665	-0.336682
1986	1.19892	0.0777303	0.61286	0.194978	0.393297	0.568193	0.144608	-0.125474	-0.755428	1.23114	1986	-12.4837	-12.5936	-12.9542	-12.6606	-12.5551	-12.3676	-14.0271	-13.7863	-14.1412	-13.6017	1986	-12.3321	-12.4421	-12.8027	-12.509	-12.4035	-12.2161	-13.8755	-13.6347	-13.9897	-13.4502		1986	0.5	-1.2	-12.673	-12.4614	-13.8891	-12.5215	-12.3098	-13.7375		1986	-0.606909	0.521123	-0.146298	0.480745	0.284199
1987	0.485757	0.11404	0.829082	0.778257	1.48429	-0.0627562	0.971582	0.991792	-0.297071	1.24107	1987	-12.6816	-13.1946	-13.1799	-13.087	-12.9208	-12.4261	-14.1375	-13.9828	-14.3963	-13.7281	1987	-12.5754	-13.0883	-13.0737	-12.9808	-12.8146	-12.3198	-14.0313	-13.8766	-14.29	-13.6219		1987	-0.75	-2.3	-13.0358	-12.6734	-14.0612	-12.9296	-12.5672	-13.9549		1987	-1.67611	0.551784	-0.356105	0.710769	-0.648478
1988	-0.628964	-0.376477	0.498028	0.592626	-0.138895	0.0187954	0.607463	0.0813043	1.09562	1.40268	1988	-12.4987	-12.2062	-12.6112	-12.1804	-11.9614	-11.8082	-13.4737	-13.5817	-14.1594	-13.34	1988	-12.2035	-11.911	-12.316	-11.8852	-11.6663	-11.513	-13.1785	-13.2865	-13.8642	-13.0448		1988	0.72	1.4	-12.3741	-11.8848	-13.6387	-12.0789	-11.5896	-13.3435		1988	1.27806	0.0213033	1.48717	-0.06005	0.152945
1989	-0.270938	-0.847706	-0.375737	0.00636748	-0.686108	-0.34995	-0.230574	1.55821	0.751775	1.41487	1989	-12.0386	-11.9592	-12.2349	-11.9275	-11.8661	-11.8596	-13.8688	-14.0279	-13.9876	-13.5357	1989	-11.8069	-11.7275	-12.0032	-11.6958	-11.6345	-11.628	-13.6371	-13.7962	-13.756	-13.304		1989	5.08	0.3	-12.04	-11.8629	-13.855	-11.8084	-11.6312	-13.6233		1989	-0.12463	-0.372003	0.615686	-0.518029	0.288686
1990	-0.803764	-0.120415	-0.346807	-0.0130958	-0.782709	-0.13354	-0.88339	-0.613066	0.0844683	0.783272	1990	-11.7034	-11.7681	-12.0152	-11.6583	-11.7437	-11.7707	-13.5277	-13.797	-14.0622	-13.2471	1990	-11.5493	-11.6141	-11.8611	-11.5042	-11.5896	-11.6166	-13.3736	-13.6429	-13.9081	-13.093		1990	3.96	1	-11.7863	-11.7572	-13.6585	-11.6322	-11.6031	-13.5044		1990	-0.245679	-0.32102	-0.360414	-0.458125	0.18618
1991	1.61976	0.601352	-0.240216	1.43915	0.16595	-0.428438	0.324635	-0.661876	1.3554	0.797022	1991	-12.0726	-12.0743	-12.1322	-11.9562	-11.9712	-12.0089	-13.7246	-14.0038	-14.3572	-13.3641	1991	-11.6672	-11.6689	-11.7267	-11.5508	-11.5658	-11.6034	-13.3192	-13.5983	-13.9518	-12.9587		1991	1.03	-0.3	-12.0589	-11.99	-13.8624	-11.6534	-11.5846	-13.457		1991	0.892204	0.855011	1.01825	-0.131244	0.502968
1992	-0.114401	-0.368086	-0.132496	-0.555957			-0.394527	-0.379672	0.318799	-0.273422	1992	-12.0497	-12.3834	-12.2643	-11.7002			-13.8218	-14.0591	-13.9835	-13.6468	1992	-11.7092	-12.0428	-11.9237	-11.3596			-13.4813	-13.7185	-13.643	-13.3063		1992	3.28	1	-12.0994		-13.8778	-11.7588		-13.5372		1992	0.585995	-0.292735	0.33644		0.432581
1993							0.509052	0.0270236	0.916604	-0.258817	1993							-14.1648	-14.4713	-14.3466	-13.7737	1993							-14.0336	-14.3401	-14.2154	-13.6425		1993	2.67	-0.4			-14.1891			-14.0579		1993	-1.73162		-0.766954		-0.206614
1994							0.203595		-0.0251234	-0.476148	1994							-13.9335		-14.3518	-13.5182	1994							-13.4464		-13.8647	-13.0312		1994	3.03	1.2			-13.9345			-13.4474		1994					0.130706
1995							0.517445		0.0469493	-0.460841	1995							-13.969		-14.0675	-13.5398	1995							-13.2914		-13.39	-12.8622		1995	3.96	-2.1			-13.8588			-13.1812		1995					0.784101
1996							1.12318		1.37874	-3.8516	1996							-14.1221		-14.5894	-13.3289	1996							-14.3537		-14.8209	-13.5604		1996	-3.78	1.2			-14.0135			-14.245		1996					-1.5243
1997										-3.83753	1997										-13.6957	1997										-13.6957		1997	-0.2	-0.9			-13.6957			-13.6957		1997					-0.899347
1998										-3.8234	1998										-13.2554	1998										-13.2554		1998	0.72	0.3			-13.2554			-13.2554		1998					0.134564
1999											1999											1999												1999										1999					-1.12504
																Column 1	Column 2						Column 1	Column 2	Column 3	Column 4			Column 1	Column 2	Column 3	Column 4			wNAO	R	0.666616	0.493945	0.394915	0.696823	0.520279	0.420155		SGI	-0.275822		-0.230098		0.0889447
							Column 1	Column 2	Column 3	Column 4					Column 1							Column 1						Column 1								R^2	0.444377	0.243982	0.155958	0.485562	0.27069	0.17653			0.076078		0.0529449		0.00791116
						Column 1									Column 2	0.598041						Column 2	0.80794					Column 2	0.552819							p	<0.0001	0.0003	<0.0001	<0.0001	<0.0001	<0.0001			0.0634		0.1161		0.2333
	Column 1	Column 2	Column 3	Column 4		Column 2	0.0424438															Column 3	0.776037	0.496351				Column 3	0.54495	0.376459
Column 1						Column 3	0.134602	0.0967116														Column 4	0.812499	0.650508	0.894984			Column 4	0.699207	0.509037	0.181334				sNAO	R	0.377121	0.402113	0.195677	0.292713	0.335415	0.0209277
Column 2	0.702521					Column 4	0.00179079	0.284229	-0.0412701							0.598041																				R^2	0.14222	0.161695	0.0382896	0.0856811	0.112504	0.00043797
Column 3	0.472391	0.349824														0.748468																				p	0.0097	0.0046	0.0237	0.0491	0.0193	0.8111
Column 4	0.418876	0.0615161	0.143171																				0.73972						0.477301
							0.0864178					Column 1	Column 2	Column 3	Column 4								0.919147						0.785066
							0.274505				Column 1							Column 1	Column 2	Column 3	Column 4						Column 1	Column 2						1947-1991										1947-1991
	0.35805										Column 2	0.795134					Column 1									Column 1									wNAO	R	0.653172	0.516705	0.601098	0.677812	0.559933	0.645041		SGI	-0.272595		-0.216083		0.0999186
	0.6905				Column 1	Column 2					Column 3	0.73478	0.390435				Column 2	0.536178								Column 2	0.586527									R^2	0.426634	0.266984	0.361318	0.45943	0.313525	0.416078			0.0743078		0.046692		0.00998373
				Column 1							Column 4	0.758443	0.543839	0.850108			Column 3	0.422798	0.456155																	p	<0.0001	0.0003	<0.0001	<0.0001	<0.0001	<0.0001			0.0699		0.5038		0.5144
				Column 2	0.476444												Column 4	0.61582	0.545894	0.124266
																											0.586527								sNAO	R	0.362656	0.396131	0.375229	0.270401	0.318759	0.258804
												0.67879															0.739385									R^2	0.131519	0.156919	0.140796	0.0731168	0.101607	0.0669797
					0.476444							0.894212						0.450185																		p	0.0143	0.0069	0.0116	0.0734	0.0321	0.0864
					0.645394													0.766092
																																			For Bonferroni corrected p-values, see paper
	1972-1992
	Column 1	Column 2	Column 3	Column 4
Column 1
Column 2	0.702521
Column 3	0.472391	0.416608
Column 4	0.418876	0.342724	0.0784738
	0.405266
	0.731593
																							D
																							J
																							F
																							M
																							A
																							M
																							J
																							J
																							A
																							S
																							O
																							N
[truncated: 1 more columns]

## Sheet: d13C-SGI,NAO
	wNAO		ED-NJB-A6R			wNAO-d13C(d)			ED-NJB-A4R			wNAO-d13C(d)			ED-NJB-A2R			wNAO-d13C(d)			ED-NJB-A3R			wNAO-d13C(d)			ED-GTB-A1R			wNAO-d13C(d)				ED-GTB-A2R			wNAO-d13C(d)			ED-GJ-A1L			wNAO-d13C(d)			ED-GJ-A2R			wNAO-d13C(d)
R						-0.215958						-0.0134214						-0.232134						-0.143521						-0.263534							-0.272588						0.134141						-0.310749
R2						0.0466379						0.000180134						0.0538863						0.0205982						0.0694499							0.0743045						0.0179937						0.0965649
p												0.95						0.1202						0.6103						0.0704							0.0643						0.3215						0.056
						SGI-d13C(d)						SGI-d13C(d)						SGI-d13C(d)						SGI-d13C(d)						SGI-d13C(d)							SGI-d13C(d)						SGI-d13C(d)						SGI-d13C(d)
R						0.346186						-0.18972						-0.269153						0.22339						-0.254885							-0.0236143						0.145489						-0.058002
R2						0.119845						0.0359935						0.0724432						0.0499032						0.0649664							0.000557635						0.0211671						0.00336423
p												0.3635						0.0701						0.1594						0.0806							0.8713						0.2827						0.6142
	wNAO						wNAO						wNAO						wNAO						wNAO						wNAO							wNAO						wNAO
1819
1820
1821
1822
1823
1824
1825
1826
1827
1828
1829
1830
1831
1832
1833
1834
1835
1836
1837
1838
1839
1840
1841
1842
1843
1844
1845
1846
1847
1848
1849
1850
1851
1852
1853
1854
1855
1856
1857
1858
1859
1860
1861
1862
1863
1864	-1.02						-1.02						-1.02						-1.02						-1.02						-1.02							-1.02						-1.02
1865	-1.24						-1.24						-1.24						-1.24						-1.24						-1.24							-1.24						-1.24
1866	0.54						0.54						0.54						0.54						0.54						0.54							0.54						0.54
1867	-1.38						-1.38						-1.38						-1.38						-1.38						-1.38							-1.38						-1.38
1868	2.81						2.81						2.81						2.81						2.81						2.81							2.81						2.81
1869	1.7						1.7						1.7						1.7						1.7						1.7							1.7						1.7
1870	-3.01						-3.01						-3.01						-3.01						-3.01						-3.01							-3.01						-3.01
1871	-1.01						-1.01						-1.01						-1.01						-1.01						-1.01							-1.01						-1.01
1872	-0.76						-0.76						-0.76						-0.76						-0.76						-0.76							-0.76						-0.76
1873	-0.5						-0.5						-0.5						-0.5						-0.5						-0.5							-0.5						-0.5
1874	2.32						2.32						2.32						2.32						2.32						2.32							2.32						2.32
1875	-1.35						-1.35						-1.35						-1.35						-1.35						-1.35							-1.35						-1.35
1876	0.21						0.21						0.21						0.21						0.21						0.21							0.21						0.21
1877	0.05						0.05						0.05						0.05						0.05						0.05							0.05						0.05
1878	1.46						1.46						1.46						1.46						1.46						1.46							1.46						1.46
1879	-2.22						-2.22						-2.22						-2.22						-2.22						-2.22							-2.22						-2.22
1880	0.89						0.89						0.89						0.89						0.89						0.89							0.89						0.89
1881	-3.8						-3.8						-3.8						-3.8						-3.8						-3.8							-3.8						-3.8
1882	3.87						3.87						3.87						3.87						3.87						3.87							3.87						3.87
1883	-0.23						-0.23						-0.23						-0.23						-0.23						-0.23							-0.23						-0.23
1884	1.44						1.44						1.44						1.44						1.44						1.44							1.44						1.44
1885	0.89						0.89						0.89						0.89						0.89						0.89							0.89						0.89
1886	-1.12						-1.12						-1.12						-1.12						-1.12						-1.12							-1.12						-1.12
1887	0.45						0.45						0.45						0.45						0.45						0.45							0.45						0.45
1888	-2.75						-2.75						-2.75						-2.75						-2.75						-2.75							-2.75						-2.75
1889	-0.1						-0.1						-0.1						-0.1						-0.1						-0.1							-0.1						-0.1
1890	1.78						1.78						1.78						1.78						1.78						1.78							1.78						1.78
1891	-0.82						-0.82						-0.82						-0.82						-0.82						-0.82							-0.82						-0.82
1892	-2.02						-2.02						-2.02						-2.02						-2.02						-2.02							-2.02						-2.02
1893	-1.07						-1.07						-1.07						-1.07						-1.07						-1.07							-1.07						-1.07
1894	2.68						2.68						2.68						2.68						2.68						2.68							2.68						2.68
1895	-3.97						-3.97						-3.97						-3.97						-3.97						-3.97							-3.97						-3.97
1896	1.12						1.12						1.12						1.12						1.12						1.12							1.12						1.12
1897	1.09						1.09						1.09						1.09						1.09						1.09							1.09						1.09
1898	1.02						1.02						1.02						1.02						1.02						1.02							1.02						1.02
1899	0.03						0.03						0.03						0.03						0.03						0.03							0.03						0.03
1900	-2.13						-2.13						-2.13						-2.13						-2.13						-2.13							-2.13						-2.13
1901	-0.33						-0.33						-0.33						-0.33						-0.33						-0.33							-0.33						-0.33
1902	-1.41						-1.41						-1.41						-1.41						-1.41						-1.41							-1.41						-1.41
1903	3.89						3.89						3.89						3.89						3.89						3.89							3.89						3.89
1904	0.23						0.23						0.23						0.23						0.23						0.23							0.23						0.23
1905	1.98						1.98						1.98						1.98						1.98						1.98							1.98						1.98
1906	2.06						2.06						2.06						2.06						2.06						2.06							2.06						2.06
1907	2.06						2.06						2.06						2.06						2.06						2.06							2.06						2.06
1908	1.44						1.44						1.44						1.44						1.44						1.44							1.44						1.44
1909	0						0						0						0						0						0							0						0
1910	2.1						2.1						2.1						2.1						2.1						2.1							2.1						2.1
1911	0.29						0.29						0.29						0.29						0.29						0.29							0.29						0.29
1912	0.24						0.24						0.24						0.24						0.24						0.24							0.24						0.24
1913	2.69						2.69						2.69						2.69						2.69						2.69							2.69						2.69
1914	1.48						1.48						1.48						1.48						1.48						1.48							1.48						1.48
1915	-0.2						-0.2						-0.2						-0.2						-0.2						-0.2							-0.2						-0.2
1916	-0.69						-0.69						-0.69						-0.69						-0.69						-0.69							-0.69						-0.69		0.520123	-14.8467	-11.9011	-0.479802
1917	-3.8						-3.8						-3.8						-3.8						-3.8						-3.8							-3.8						-3.8		-0.0856224	-15.7489	-12.2808	1.32685
1918	-0.8						-0.8						-0.8						-0.8						-0.8						-0.8							-0.8						-0.8		1.18665	-14.8627	-11.5831	-0.215198
1919	-0.8						-0.8						-0.8						-0.8						-0.8						-0.8							-0.8						-0.8		-0.237391	-14.2033	-11.0641	-1.34185
1920	3.18						3.18						3.18						3.18						3.18						3.18							3.18						3.18		-0.220728	-14.3857	-10.6932	-0.881561
1921	1.63						1.63						1.63						1.63						1.63						1.63							1.63						1.63		0.713393	-14.3007	-10.3178	-0.926724
1922	1.85						1.85						1.85						1.85						1.85						1.85							1.85						1.85		-1.07163	-13.4311	-11.0034	-2.47325
1923	1.73						1.73						1.73						1.73						1.73						1.73							1.73						1.73		0.0923165	-14.6077	-11.462	-0.0999319
1924	-1.13						-1.13						-1.13						-1.13						-1.13						-1.13							-1.13						-1.13		0.845478	-16.4561	-11.765	3.59276
1925	2.39						2.39						2.39						2.39						2.39						2.39							2.39						2.39		0.343226	-14.1793	-10.9347	-0.676722
1926	0.11						0.11						0.11						0.11						0.11						0.11							0.11						0.11		0.810025	-15.6911	-11.4139	2.3985
1927	1.72						1.72						1.72						1.72						1.72						1.72							1.72						1.72		-0.971286	-15.4217	-11.4141	2.0203
1928	0.63						0.63						0.63						0.63						0.63						0.63							0.63						0.63		-0.764795	-13.7758	-11.7082	-1.06597
1929	-1.03						-1.03						-1.03						-1.03						-1.03						-1.03							-1.03						-1.03		1.02801	-14.8409	-12.0479	1.18165
1930	0.91						0.91						0.91						0.91						0.91						0.91							0.91						0.91		-0.896389	-14.0408	-11.4387	-0.252591
1931	-0.16						-0.16						-0.16						-0.16						-0.16						-0.16							-0.16						-0.16		-1.48487	-14.3471	-11.7644	0.512459
1932	-0.5						-0.5						-0.5						-0.5						-0.5						-0.5							-0.5						-0.5		-1.92607	-14.6442	-12.1093	1.26998
1933	0.25						0.25						0.25						0.25						0.25						0.25							0.25						0.25		-1.61321	-13.2875	-11.5358	-1.30582
1934	0.86						0.86						0.86						0.86						0.86						0.86							0.86						0.86		-1.03333	-13.2875	-11.5358	-1.15134
1935	0.97						0.97						0.97						0.97						0.97						0.97							0.97						0.97		0.148836	-14.1344	-12.0946	0.737451
1936	-3.89						-3.89						-3.89						-3.89						-3.89						-3.89							-3.89						-3.89		1.05108	-13.8691	-12.2168	0.360446
1937	0.72						0.72						0.72						0.72						0.72						0.72							0.72						0.72		1.85047	-13.5882	-11.3743	-0.053519
1938	1.79						1.79						1.79						1.79						1.79						1.79							1.79						1.79		1.22693	-12.8495	-11.0035	-1.42626
1939	0.37						0.37						0.37						0.37						0.37						0.37							0.37						0.37		-0.742964	-13.08	-11.3803	-0.787196
1940	-2.86						-2.86						-2.86						-2.86						-2.86						-2.86							-2.86						-2.86		0.183588	-13.781	-12.0589	0.848323
1941	-2.31						-2.31						-2.31						-2.31						-2.31						-2.31							-2.31						-2.31		-0.971277	-13.9151	-11.7525	1.30051
1942	-0.55						-0.55						-0.55						-0.55						-0.55						-0.55							-0.55		0.406277	-14.6894	-11.7468	0.382385	-0.55		-0.341496	-14.0493	-11.4462	1.75577
1943	1.48						1.48						1.48						1.48						1.48						1.48							1.48		0.917095	-14.5718	-11.2936	0.420983	1.48		0.218583	-12.8348	-11.6194	-0.675591
1944	0.61						0.61						0.61						0.61						0.61		-0.346073	-11.2514	-8.44066	-1.64516	0.61							0.61		2.35243	-14.4542	-10.8405	0.459798	0.61		1.94625	-12.6623	-11.4115	-0.893207
1945	1.64						1.64						1.64						1.64						1.64		0.617275	-11.5919	-8.90201	-1.24464	1.64			0.0308408	-11.5183	-8.48299	-0.450378	1.64		0.0978835	-14.4435	-11.2952	0.858515	1.64		0.483538	-12.6916	-11.6356	-0.680347
1946	0.27						0.27						0.27						0.27						0.27		0.73164	-12.3203	-9.30715	0.153205	0.27			0.0531941	-11.038	-8.80176	-2.70986	0.27		0.251906	-13.989	-11.5918	-0.248922	0.27		0.830808	-13.1996	-11.2689	0.572465
1947	-2.71						-2.71						-2.71		0.524641	-9.91345	-10.136	-0.189448	-2.71						-2.71		1.0227	-12.7152	-9.87385	0.681891	-2.71			0.403668	-11.9896	-9.19225	0.718646	-2.71		0.21971	-13.9811	-12.0053	0.152894	-2.71		0.015741	-13.1179	-11.4012	0.542283
1948	1.34						1.34						1.34		-2.16399	-11.1204	-9.58652	2.41697	1.34						1.34		-1.36636	-13.1192	-9.48626	1.25321	1.34			-0.561559	-11.6642	-8.68945	-0.904445	1.34		-0.193565	-13.6905	-11.7072	-0.424774	1.34		-0.0238326	-12.9132	-11.0027	0.234939
1949	1.87						1.87						1.87		-0.0501938	-10.1327	-9.14768	-0.242356	1.87						1.87		-1.75126	-13.1402	-9.55066	0.905027	1.87			-1.51281	-12.0466	-8.3904	0.256189	1.87		0.925506	-13.445	-11.4016	-0.864009	1.87		1.78727	-12.1264	-11.1143	-1.36857
1950	1.4						1.4						1.4		0.120265	-10.6207	-9.15562	0.616423	1.4						1.4		1.14888	-12.5191	-9.75811	-0.962234	1.4			-0.421209	-11.947	-8.45973	-0.452235	1.4		-3.54681	-13.3067	-11.2806	-0.943136	1.4		-0.0851563	-11.8171	-11.0678	-1.9341
1951	-1.26						-1.26						-1.26		-0.168154	-10.1077	-9.78712	-0.866514	-1.26						-1.26		0.920043	-13.26	-9.81587	0.560443	-1.26			0.454512	-12.1562	-9.04315	0.0464009	-1.26		-1.96038	-13.5308	-12.2656	0.253946	-1.26		0.755093	-12.4455	-11.5319	-0.420907
1952	0.83						0.83						0.83		0.829967	-9.76616	-9.2469	-1.92835	0.83						0.83		-1.01365	-13.0193	-9.57269	-0.260258	0.83			1.09711	-12.1578	-8.93655	-0.237008	0.83		0.838561	-13.422	-12.0046	0.265574	0.83		-2.05666	-12.5603	-11.6183	-0.0529081
1953	0.18						0.18						0.18		0.245031	-10.6511	-9.44427	-0.200269	0.18						0.18		0.578823	-13.1353	-9.69914	-0.166016	0.18			0.0212847	-12.645	-9.43357	1.34434	0.18		-0.964307	-13.4897	-11.5845	0.90407	0.18		-1.20626	-12.3428	-11.5031	-0.436673
1954	0.13						0.13						0.13		-0.01625	-10.7255	-9.77367	-0.330923	0.13						0.13		0.356726	-13.4266	-9.79745	0.396768	0.13			-0.716798	-12.6616	-9.56187	1.15604	0.13		-1.44895	-13.4898	-11.9806	1.2939	0.13		-0.629806	-12.1857	-11.5187	-0.694792
1955	-2.54						-2.54						-2.54		1.28098	-10.7166	-10.3991	-0.648456	-2.54						-2.54		-1.54053	-14.0611	-10.0281	1.82744	-2.54			0.0818549	-12.8834	-9.63974	1.76564	-2.54		-0.70263	-12.924	-11.8068	-0.403089	-2.54		0.208597	-12.2134	-11.6507	-0.544242
1956	-1.73						-1.73						-1.73		1.03845	-10.821	-9.74544	-0.71736	-1.73						-1.73		-0.49966	-13.7058	-9.60339	0.955236	-1.73			-1.20218	-12.7638	-9.83831	1.12058	-1.73		2.23612	-12.9103	-11.8084	-0.09921	-1.73		-1.02572	-12.5553	-11.7572	0.312855
1957	1.52						1.52						1.52		-0.180935	-10.133	-9.76309	-2.49142	1.52						1.52		-0.595801	-13.7954	-9.55085	1.18993	1.52			-0.524681	-12.4048	-9.93528	-0.386364	1.52		0.619354	-13.1626	-11.3604	1.18218	1.52		-1.59396	-12.563	-11.6231	0.407413
1958	-1.02						-1.02						-1.02		-0.562061	-11.1269	-10.2151	-0.653724	-1.02						-1.02		-1.11388	-13.0641	-9.2974	-0.497658	-1.02			-1.21895	-12.5213	-9.86734	-0.0932754	-1.02		-0.42259	-12.7189	-11.7174	-0.15192	-1.02		-0.630384	-12.2495	-11.5529	-0.236657
1959	-0.37						-0.37						-0.37		-0.140973	-11.7082	-10.1831	0.276987	-0.37						-0.37		1.86505	-12.8902	-9.21523	-0.84386	-0.37			-0.630701	-12.4754	-9.6139	-0.381362	-0.37		0.772268	-12.3844	-11.6209	-1.11557	-0.37		1.11407	-12.2595	-11.5663	-0.150951
1960	-1.54						-1.54						-1.54		-0.399683	-12.0201	-10.0284	0.635424	-1.54						-1.54		2.05062	-12.8359	-9.05563	-0.904775	-1.54			0.896864	-12.6222	-9.32301	0.0647442	-1.54		0.373891	-12.5248	-11.7697	-0.314521	-1.54		1.85229	-12.5964	-11.5528	0.678095
1961	1.8						1.8						1.8		-0.456936	-12.4561	-9.7131	1.25323	1.8						1.8		0.181135	-12.9368	-9.13558	-0.604816	1.8			-0.538554	-12.7656	-9.00419	0.516532	1.8		-0.0740926	-12.3656	-11.8022	-0.677838	1.8		0.582097	-11.8097	-11.1105	-1.07356
1962	-2.38						-2.38						-2.38		-0.711521	-12.0712	-9.84384	0.211218	-2.38						-2.38		-0.963264	-12.7664	-9.6951	-0.974808	-2.38			0.984379	-12.5345	-9.6984	-0.395153	-2.38		-0.443952	-12.2472	-11.8264	-0.919782	-2.38		-0.0909243	-12.047	-11.7242	-0.483121
1963	-3.6						-3.6						-3.6		0.264548	-12.5182	-10.0479	0.880956	-3.6						-3.6		0.129143	-13.1379	-10.1486	-0.0658528	-3.6			1.32061	-12.3629	-10.2637	-1.06856	-3.6		-0.128588	-12.2472	-11.8264	-0.740255	-3.6		-0.209946	-11.9984	-12.1941	-0.553826
1964	-2.86						-2.86						-2.86		-0.449624	-13.0356	-10.0887	1.70272	-2.86						-2.86		0.297257	-12.5422	-10.1217	-1.50536	-2.86			-0.507205	-12.3864	-10.1775	-1.00687	-2.86		-0.355879	-12.2472	-11.8264	-0.592049	-2.86		0.337648	-12.2164	-11.8863	-0.0144621
1965	-2.88						-2.88						-2.88		-0.234206	-13.0977	-10.0557	1.63694	-2.88						-2.88		0.581709	-13.057	-10.054	-0.297684	-2.88			0.47399	-12.6867	-9.99082	0.0902264	-2.88		0.674836	-12.5511	-11.5518	0.701131	-2.88		-0.548321	-12.3287	-11.9472	0.278756
1966	-1.69						-1.69						-1.69		-1.19303	-12.5085	-9.87453	0.317641	-1.69						-1.69		0.468536	-13.0739	-9.95793	-0.301529	-1.69			-0.414397	-12.7151	-9.68614	0.202829	-1.69		-0.237539	-12.3393	-11.4926	-0.0317412	-1.69		0.42742	-12.312	-11.4506	0.271296
1967	1.28						1.28						1.28		0.849872	-11.6919	-9.33493	-1.40823	1.28						1.28		-0.604301	-12.8246	-9.62077	-0.94812	1.28			0.324639	-12.8624	-9.41484	0.771914	1.28		0.250139	-11.9892	-11.4116	-1.33405	1.28		0.0369797	-11.8049	-11.2144	-0.872369
1968	-1.04						-1.04		0.54603	-8.82368	-10.292	-1.88837	-1.04		0.221866	-11.8034	-9.44353	-1.291	-1.04						-1.04		-0.877288	-13.3154	-9.54807	0.183011	-1.04			1.75191	-12.7225	-9.50184	0.301903	-1.04		0.261242	-11.9711	-11.7753	-1.37839	-1.04		-2.09276	-12.0569	-11.5485	-0.262754
1969	-4.89						-4.89		1.44004	-9.30553	-10.3804	-1.28671	-4.89		0.95195	-12.8565	-10.2669	0.670969	-4.89						-4.89		-1.27021	-14.1426	-9.87046	2.13738	-4.89			0.969171	-13.1982	-9.68495	2.1235	-4.89		-1.04964	-11.9607	-11.9838	-1.41976	-4.89		-0.866496	-12.8256	-11.8634	1.54395
1970	-1.89						-1.89		0.916126	-9.4842	-10.0096	-1.59907	-1.89		0.91633	-12.8065	-10.172	0.508332	-1.89		0.0619678	-13.3971	-10.531	2.35022	-1.89		-1.31577	-13.8009	-9.54681	1.33441	-1.89			-1.07084	-13.3059	-9.50319	2.6082	-1.89		0.570698	-12.0005	-12.0765	-1.28988	-1.89		-0.65091	-12.5391	-11.3059	0.90674
1971	-0.96						-0.96		-1.71917	-10.8284	-9.77081	1.4204	-0.96		0.824951	-12.7564	-10.077	0.368067	-0.96		0.357759	-12.1845	-10.0758	0.284074	-0.96		0.682483	-14.1255	-9.62987	2.16743	-0.96			1.21202	-12.7524	-9.40698	0.660215	-0.96		0.778081	-12.109	-11.8229	-0.912632	-0.96		0.126363	-12.0037	-11.3951	-0.308999
1972	0.34		0.63898	-8.5078	-9.81402	0.535874	0.34		-0.054205	-10.8639	-9.99938	0.695793	0.34		0.392174	-12.6564	-9.88712	0.152879	0.34		-0.528059	-11.3499	-9.80114	-1.134	0.34		1.7726	-13.6372	-9.4678	1.09214	0.34			0.639792	-12.4672	-9.19925	-0.288392	0.34		-0.0488327	-12.9439	-11.6804	2.26502	0.34		-0.113386	-12.012	-11.2631	-0.263145
1973	2.52		-1.08648	-8.65353	-9.81574	0.307078	2.52		-0.989385	-10.8631	-9.79787	-0.0551002	2.52		-0.313216	-12.5947	-9.94007	0.0325386	2.52		-0.144509	-11.6009	-9.67356	-0.675269	2.52		1.28577	-12.9041	-9.08727	-0.553513	2.52			-0.00629901	-12.1307	-8.99915	-1.42807	2.52		-0.863806	-12.5189	-11.5211	0.553891	2.52		-0.375865	-12.489	-11.3222	0.873691
1974	1.23		-0.182034	-8.83138	-10.1242	0.164363	1.23		-0.811022	-11.6391	-9.83525	1.30785	1.23		0.308724	-12.8426	-10.2563	0.529181	1.23		0.0954862	-12.8468	-10.2145	1.50862	1.23		0.221992	-12.5286	-8.87744	-1.33813	1.23			-0.66547	-12.1251	-9.13419	-1.33776	1.23		-0.477296	-12.3389	-11.4456	-0.207173	1.23		0.386719	-12.3956	-11.3508	0.686538
1975	1.63		0.171511	-8.64828	-9.59755	-0.993628	1.63		-0.665197	-11.0683	-9.46307	-0.803141	1.63		-0.72528	-13.2088	-10.4789	1.27477	1.63		-0.229165	-11.314	-10.049	-1.13795	1.63		0.052455	-12.6933	-8.8006	-0.822798	1.63			0.143104	-12.0786	-9.24243	-1.405	1.63		-0.416802	-12.3821	-11.5173	-0.102094	1.63		-0.245003	-12.3127	-11.0859	0.52502
1976	1.37		-1.59855	-9.26129	-9.65502	-0.0318215	1.37		-0.109181	-11.9254	-9.25979	0.814043	1.37		-2.26828	-13.0191	-10.3631	0.963887	1.37		-1.62099	-11.2616	-9.95693	-1.21925	1.37		1.08321	-12.6403	-9.26404	-0.84979	1.37			0.190823	-11.9918	-9.65132	-1.63118	1.37		-0.33774	-12.5563	-11.6234	0.516149	1.37		-0.450293	-12.2318	-11.2409	0.36975
1977	-2.14		-1.32196	-8.95105	-9.98518	-1.56729	-2.14		-0.994955	-11.9965	-9.77274	0.477146	-2.14		0.514831	-12.185	-10.0544	-0.585924	-2.14		-1.57366	-11.7226	-10.2456	-0.413914	-2.14		-1.05202	-13.3952	-9.51475	1.07688	-2.14			-1.192	-12.2285	-9.82269	-0.650814	-2.14		-0.288849	-12.1901	-11.5213	-0.935616	-2.14		-0.215374	-12.3462	-11.7106	0.672123
1978	0.17		1.013	-9.54795	-10.1102	-0.80752	0.17		-0.502369	-11.722	-10.1863	-0.64046	0.17		0.00227426	-12.3729	-9.99724	-0.141622	0.17		0.517795	-11.3579	-9.44571	-1.05063	0.17		-0.859955	-12.6077	-9.35028	-0.787632	0.17			-1.16547	-11.9812	-9.78374	-1.49808	0.17		1.99605	-12.9457	-11.9688	1.94886	0.17		0.595034	-12.4314	-12.0601	0.908388
1979	-2.25		1.77805	-10.9477	-10.3004	1.80632	-2.25		0.51071	-13.0919	-10.3518	2.28323	-2.25		-0.0777151	-12.714	-10.2512	0.61356	-2.25		1.6456	-11.7934	-10.0128	-0.302042	-2.25		-1.31213	-12.4922	-9.82945	-1.03746	-2.25			-0.553744	-12.2975	-9.86367	-0.229433	-2.25		0.225855	-12.787	-11.9204	1.33486	-2.25		0.304514	-12.0566	-11.6171	0.0693294
1980	0.56		1.38358	-10.8394	-9.83094	0.728881	0.56		1.76427	-12.516	-10.0933	0.559365	0.56		-1.94311	-11.9792	-10.0843	-0.734246	0.56		1.50219	-12.1091	-9.65668	0.232385	0.56		-0.404393	-12.6292	-9.87237	-0.696888	0.56			0.133455	-12.5307	-9.66048	0.724027	0.56		-0.640743	-12.8672	-11.8502	1.66623	0.56		0.454153	-11.7777	-11.2876	-0.54598
1981	2.05		-0.600943	-9.86322	-9.58037	-2.25088	2.05		0.378204	-11.7906	-9.60854	-1.43292	2.05		-0.584773	-11.1022	-10.0161	-2.37157	2.05		0.592698	-11.488	-9.6174	-0.863913	2.05		-0.739701	-12.613	-9.83345	-0.757787	2.05			-0.665879	-12.3446	-9.61087	0.0909654	2.05		-0.0231854	-12.7242	-11.6017	1.16472	2.05		1.35536	-11.7777	-11.2876	-0.507516
1982	0.8		-0.235643	-10.846	-9.64386	-0.751609	0.8		-0.809732	-12.3056	-9.49865	-0.448047	0.8		0.261177	-11.6263	-9.83285	-1.24854	0.8		0.583744	-11.8057	-9.54593	-0.333374	0.8		-0.111704	-12.7339	-9.83366	-0.502379	0.8			0.380117	-12.4168	-9.6354	0.434656	0.8		0.230042	-12.6857	-11.5726	1.09219	0.8		2.19667	-11.6235	-10.998	-0.831653
1983	3.42		-0.520603	-11.6799	-9.52022	0.361639	3.42		0.424984	-12.8006	-9.55201	0.515448	3.42		1.49517	-11.9544	-9.63453	-0.508031	3.42		0.710914	-12.387	-9.46004	0.650997	3.42		1.1991	-13.3014	-9.68889	0.833844	3.42			-3.00646	-12.4566	-9.59859	0.658109	3.42		1.23915	-12.4405	-11.3712	0.245908	3.42		1.01824	-11.5087	-10.7825	-1.06373
1984	1.6		0.372673	-12.0374	-9.63603	0.48267	1.6		0.269389	-12.9677	-9.69605	0.748893	1.6		1.6894	-12.2884	-9.81895	0.249481	1.6		1.21073	-12.8949	-9.72526	1.50648	1.6		-1.63174	-13.5789	-9.63622	1.46129	1.6			-1.69397	-12.4215	-9.65597	0.600737	1.6		0.799483	-12.0322	-11.3124	-1.21448	1.6		1.23026	-11.815	-10.98	-0.30324
1985	-0.63		-0.0704182	-12.3157	-9.99767	0.529548	-0.63		0.0101073	-12.8022	-9.84619	0.25121	-0.63		1.27237	-12.3168	-10.112	0.401095	-0.63		-0.593365	-11.8055	-9.92768	-0.398789	-0.63		2.02163	-12.9637	-9.61157	-0.07621	-0.63			2.01169	-12.4228	-9.65105	0.685539	-0.63		-0.918648	-12.0827	-11.3055	-0.87795	-0.63		-0.046814	-12.043	-11.127	0.274162
1986	0.5		-1.00509	-12.8489	-9.74074	1.19892	0.5		-0.715512	-12.7623	-9.8507	0.0777303	0.5		-0.138696	-12.3735	-10.2113	0.61286	0.5		-0.56834	-12.1602	-9.91765	0.194978	0.5		-0.618978	-13.1661	-9.81218	0.393297	0.5			0.326381	-12.3698	-9.62469	0.568193	0.5		0.582706	-12.3036	-11.2841	0.144608	0.5		0.125778	-11.857	-11.0433	-0.125474
1987	-0.75		-1.48365	-12.6359	-9.8123	0.485757	-0.75		-1.78573	-12.8019	-10.3252	0.11404	-0.75		-2.46702	-12.4302	-10.3106	0.829082	-0.75		-0.968039	-12.5078	-10.2177	0.778257	-0.75		-0.0849561	-13.6175	-10.0515	1.48429	-0.75			-0.627255	-12.1816	-9.55673	-0.0627562	-0.75		-0.788164	-12.468	-11.2682	0.971582	-0.75		-0.329375	-12.3118	-11.1135	0.991792
1988	0.72		0.982176	-12.1658	-10.0171	-0.628964	0.72		1.58239	-12.6022	-9.72457	-0.376477	0.72		1.92073	-12.2146	-10.1296	0.498028	0.72		0.62693	-12.408	-9.69877	0.592626	0.72		0.791497	-12.9475	-9.47987	-0.138895	0.72			2.18285	-12.1792	-9.32661	0.0187954	0.72		0.356024	-12.3232	-10.9921	0.607463	0.72		0.386308	-11.9101	-11.1002	0.0813043
1989	5.08		0.515093	-12.4113	-9.36136	-0.270938	5.08		-0.79586	-12.4037	-9.28194	-0.847706	5.08		0.396432	-11.7327	-9.55763	-0.375737	5.08		-0.614185	-12.0738	-9.25024	0.00636748	5.08		0.390457	-12.7162	-9.18891	-0.686108	5.08			0.840914	-12.0589	-9.18241	-0.34995	5.08		0.928924	-12.0552	-11.1915	-0.230574	5.08		0.94717	-12.5141	-11.3506	1.55821
1990	3.96		-0.19386	-12.1865	-9.15185	-0.803764	3.96		1.04574	-12.724	-9.2166	-0.120415	3.96		-0.191414	-11.6953	-9.46366	-0.346807	3.96		-1.64318	-12.0665	-9.10671	-0.0130958	3.96		-0.593218	-12.6689	-9.19218	-0.782709	3.96			-0.127611	-12.0909	-9.21911	-0.13354	3.96		0.168686	-11.8323	-10.9762	-0.88339	3.96		0.158518	-11.5828	-11.2455	-0.613066
1991	1.03		1.61385	-12.7406	-9.40408	1.61976	1.03		1.58115	-13.0381	-9.4058	0.601352	1.03		-0.247535	-11.6953	-9.46366	-0.240216	1.03		0.621348	-12.9123	-9.2877	1.43915	1.03		0.667214	-13.0503	-9.30268	0.16595	1.03			1.36928	-11.9898	-9.34031	-0.428438	1.03		-0.349947	-12.074	-11.0561	0.324635	1.03		0.31053	-11.5447	-11.3352	-0.661876
1992	3.28		-0.169687	-12.618	-9.24908	-0.114401	3.28		0.244695	-12.6107	-9.58273	-0.368086	3.28		0.870024	-11.6953	-9.46366	-0.132496	3.28		1.39895	-11.7554	-8.89956	-0.555957	3.28						3.28							3.28		0.0458313	-11.8295	-11.0212	-0.394527	3.28		0.974947	-11.6454	-11.2584	-0.379672
1993	2.67						2.67						2.67						2.67						2.67						2.67							2.67		-0.89994	-11.9865	-11.2373	0.509052	2.67		-0.73941	-11.7979	-11.5438	0.0270236
1994	3.03						3.03						3.03						3.03						3.03						3.03							3.03		-0.0445842	-11.841	-11.2443	0.203595	3.03
1995	3.96						3.96						3.96						3.96						3.96						3.96							3.96		1.62384	-11.8461	-11.2583	0.517445	3.96
1996	-3.78						-3.78						-3.78						-3.78						-3.78						-3.78							-3.78		-1.0682	-11.9199	-11.5575	1.12318	-3.78
1997	-0.2						-0.2						-0.2						-0.2						-0.2						-0.2							-0.2		-1.46234	-10.7615	-11.04	-3.35743	-0.2
1998	0.72						0.72						0.72						0.72						0.72						0.72							0.72						0.72
[truncated: 10 more columns]

## Sheet: SGI
	Norrland	Norrland	Norrland	Norrland	Norrland	Norrland	Norrland	Norrland	Norrland	Norrland	Norrland	Norrland	Norrland	Norrland	Norrland													MEAN	MEAN	MEAN	new Norrland		n	95%+	95%-	Tw*	Stensele	Stensele	Stensele
15	Balmans1	Balmans2	Balmans3	Balmans4	Balmans5	Paerlskal1	Paerlskal2	Paerlskal3	Paerlskal4	Paerlskal5	Parlalven1	Parlalven2	Parlalven4	Parlalven5	Parlalven6	ED-NJB-A6R	ED-NJB-A4R	ED-NJB-A2R	ED-NJB-A3R	ED-GTB-A1R	ED-GTB-A2R	ED-GJ-A1L	ED-GJ-A2R	ED-GJ-A3L	ED-GJ-D6R	ED-GJ-D5L		Balmans	Paerlskal	Parlalven	MEAN	STDEV		standard error			JJA	MJJA	JJAS
n	-33	-35	-46	-59	-62	-54	-54	-62	-49	-67	21	5	34	30	25													-33	-49	34
p<0.05 r-limit	0.25	0.26	0.29	0.34	0.35	0.31	0.31	0.35	0.3	0.38	0.19	0.2	0.18	0.18	0.19													0.25	0.3	0.18
R2	0.0625	0.0676	0.0841	0.1156	0.1225	0.0961	0.0961	0.1225	0.09	0.1444	0.0361	0.04	0.0324	0.0324	0.0361													0.0625	0.09	0.0324
1757																										-0.0638241
1758																										1.23156
1759																										0.615305
1760																										-1.0111
1761																										0.346689
1762																										-0.33586
1763																										-0.24679
1764																										1.56051
1765																										0.254787
1766																										-0.530564
1767																										-0.0803265
1768																										1.56629
1769																										-0.86504
1770																										-1.40425
1771																										1.36024
1772																										0.529621
1773																										-0.18632
1774																										0.63433
1775																										-0.113698
1776																										-0.0759194
1777																										-0.292345
1778																										-1.99549
1779																										-1.41504
1780																										-1.59223
1781																										-0.933005
1782																										-1.17327
1783																										-1.06189
1784																										-0.239046
1785																										0.556619
1786																										0.185932
1787																										-0.0039018
1788																										0.685035
1789																										-0.861849
1790																										-0.944824
1791																										0.254107
1792																										0.481929
1793																										0.0846284
1794																										-1.17464
1795																										0.290016
1796																										1.17828
1797																										1.77703
1798																										0.511671
1799																										1.33348
1800																										0.779174
1801																										-0.157105
1802																										-0.565088
1803																										-1.17054
1804																										0.251604
1805																										0.727876
1806																										0.991688
1807																										2.28452
1808																										-0.409746
1809																										-1.11317
1810																										-0.138359
1811																										-0.737453
1812																										-0.890591
1813																										-0.962969
1814																										0.251236
1815																										2.36289
1816																										0.881885
1817																										-0.603285
1818																										-0.607071
1819																									1.50081	0.266728					1.50081		1
1820																									0.385532	-0.0480281					0.385532		1
1821																									-0.381075	-0.0963778					-0.381075		1
1822																									1.4382	0.488483					1.4382		1
1823																									-0.179524	-0.260699					-0.179524		1
1824																									-1.50835	-1.0461					-1.50835		1
1825																									0.501379	-0.926109					0.501379		1
1826																									-0.136373	-0.655763					-0.136373		1
1827																									-0.0699938	-0.930138					-0.0699938		1
1828																									-0.15237	0.583119					-0.15237		1
1829																									-1.18042	0.553926					-1.18042		1
1830																									-1.02311	-0.664709					-1.02311		1
1831																									-1.28775	1.13206					-1.28775		1
1832																									-1.91886	2.30637					-1.91886		1
1833																									-1.36289	1.18173					-1.36289		1
1834																									1.63596	-0.00612308					1.63596		1
1835																									0.176149	0.17748					0.176149		1
1836																									1.99373	0.664208					1.99373		1
1837																									1.35442	-0.173435					1.35442		1
1838																									0.394536	-0.0963176					0.394536		1
1839																									0.226367	-0.367227					0.226367		1
1840																									0.244581	-0.196267					0.244581		1
1841																									0.613809	0.064715					0.613809		1
1842																									1.08655	1.41843					1.08655		1
1843																									1.73296	0.354719					1.73296		1
1844																									-0.424486	1.48564					-0.424486		1
1845																									-0.936078	-0.729247					-0.936078		1
1846																									-0.331374	-0.794353					-0.331374		1
1847																									-0.0275435	0.262327					-0.0275435		1
1848																									-1.65221	-1.11758					-1.65221		1
1849																									-0.743714	-1.61959					-0.743714		1
1850																									0.199435	-1.30223					0.199435		1
1851																									0.84276	-0.111307					0.84276		1
1852																									1.31992	-0.118301					1.31992		1
1853																									1.20649	0.517393					1.20649		1
1854																									1.76757	0.139404					1.76757		1
1855																									-0.237718	-0.284837					-0.237718		1
1856																									-0.54557	-1.18747					-0.54557		1
1857																									-1.30349	-0.827269					-1.30349		1
1858																									-1.61722	-1.36618					-1.61722		1
1859																									-0.257188	-1.03411					-0.257188		1
1860													0.411733												0.812299	0.00213401				0.411733	0.612016	0.283243	2	1.00457	0.219461	9.04544	13.6	11.4	11.8
1861													0.0527396												0.475355	0.432571				0.0527396	0.264047	0.298834	2	0.678211	-0.150116	9.12524	13.9	11.125	11.75
1862													0.219883												0.108002	-0.856223				0.219883	0.163943	0.0791123	2	0.273587	0.0542986	7.3235	10.5333	10	9.525
1863													-0.0341042												-0.0907398	-0.885272				-0.0341042	-0.062422	0.0400474	2	-0.00691908	-0.117925	8.39236	12.2	10.1	11.075
1864													-0.24261	0.692073											-1.58273	-0.848324				0.224732	-0.377756	1.14341	3	0.916132	-1.67164	7.00661	11.0667	9.025	9.75
1865													-0.311084	0.676575											-0.590932	1.48452				0.182745	-0.0751473	0.665878	3	0.678364	-0.828659	6.95997	10.5	9.35	9.55
1866													0.209051	-0.647314											-0.712069	1.67555				-0.219132	-0.383444	0.514136	3	0.198356	-0.965244	8.32534	12.1667	9.975	11.15
1867													-0.279649	-0.81168											0.281042	0.00332112				-0.545665	-0.270096	0.546424	3	0.348241	-0.888433	7.32708	11.1667	8.45	10.15
1868													0.332285	0.743199											0.398832	0.718543				0.537742	0.491439	0.220555	3	0.74102	0.241857	8.2997	12.8	11.025	10.85
1869													0.0188416	-0.0692086	0.871572										-1.85314	-0.664126				0.273735	-0.257985	1.14495	4	0.864062	-1.38003	7.37765	11.1333	9.075	9.975
1870													0.094364	1.05709	-0.16271										-0.693719	-0.725058				0.329582	0.0737572	0.733101	4	0.792196	-0.644682	8.85086	13.1333	10.95	11.8
1871													0.417439	-0.532918	0.684219										-0.50759	0.255034				0.18958	0.0152877	0.627993	4	0.630721	-0.600145	7.70186	12.0333	10.05	10.125
1872													-0.25365	0.149183	0.469308										0.0637276	-0.679554				0.121613	0.107142	0.297202	4	0.3984	-0.184116	9.0391	13.9333	11.95	11.325
1873											-0.847201		-1.49188	-0.688349	-0.185143										-0.988676	2.12539				-0.803142	-0.840249	0.474061	5	-0.424716	-1.25578	9.3196	13.8667	11.4	12.2
1874											-0.26003		-0.826524	0.50506	-0.389694										-0.0864234	0.405032				-0.242797	-0.211522	0.485146	5	0.213727	-0.636771	7.38588	10.7667	9	9.775
1875											0.0878368		0.0685966	-0.0285557	0.45686									1.40906	-0.626248	-0.933187				0.146184	0.227925	0.676447	6	0.769196	-0.313345	8.00298	12.1667	10.925	10.475
1876											-0.575383		-0.224297	-1.09767	-0.371857									-0.122602	-1.7557	0.3064				-0.567301	-0.691251	0.625311	6	-0.190898	-1.1916	9.36085	14.1	11.45	12.25
1877											0.016542		0.00994116	-0.845856	0.324027									-0.743677	-0.0961157	0.383516				-0.123836	-0.222523	0.466054	6	0.150398	-0.595444	6.9992	11.1	9.15	9.4
1878											0.651066		0.0514078	-0.403535	0.385903									1.4495	-0.280603	1.04751				0.17121	0.308957	0.684888	6	0.856981	-0.239068	8.30173	11.9	10.325	10.875
1879											0.802422		0.544506	-0.131635	0.12543									1.65888	-0.979231	0.445484				0.335181	0.336729	0.894862	6	1.05277	-0.37931	8.74282	12.9667	10.975	11.675
1880											-0.501073		-0.0135333	0.482923	-1.42298									0.292198	-0.0418877	1.01626				-0.363667	-0.200726	0.686257	6	0.348394	-0.749846	7.94543	12.0333	10.225	11
1881											0.353107		0.00246479	-0.443306	-1.96735									-0.721068	-0.0373229	-0.221836				-0.513772	-0.468913	0.823863	6	0.190314	-1.12814	7.2663	11.0333	9.225	9.825
1882											1.21572		-0.123589	0.560258	0.836569									0.113703	-0.56732	0.677855				0.622241	0.339224	0.655948	6	0.864092	-0.185643	9.02335	12.9667	11.25	11.825
1883											-0.0584707		0.147758	1.12622	1.41627									-0.127641	-0.97217	1.17456				0.657944	0.255328	0.879739	6	0.959265	-0.44861	8.93305	13.2667	11.6	11.425
1884											-0.556191		-0.535474	-0.4767	0.931157									-0.888715	1.00379	2.03369				-0.159302	-0.0870225	0.82974	6	0.576908	-0.750953	8.19432	12.0333	9.725	11.025
1885											-0.275976		-0.00676106	-0.160297	-2.05004									-0.483501	-0.0591765	-0.739216				-0.623269	-0.505959	0.775357	6	0.114455	-1.12637	6.49469	10.5	8.575	9
1886											-0.545308		-0.222089	0.156899	-1.85478									-0.125741	-0.848279	-0.0804123				-0.61632	-0.573216	0.717696	6	0.00106028	-1.14749	8.04372	11.9667	10.1	10.55
1887											-0.41711		-1.07497	-0.386714	-0.488487									-0.0370931	-0.744512	0.209593				-0.59182	-0.524814	0.352364	6	-0.242865	-0.806764	7.26116	10.6667	9.4	9.825
1888											0.339466		0.172425	-1.12545	0.127379									-1.34847	0.539474	0.438911				-0.121545	-0.215862	0.807173	6	0.430011	-0.861735	7.01728	11	9.175	9.575
1889											-0.0723598	-0.0722437	0.56562	0.251159	-0.563222									-0.755807	0.00586171	0.490151				0.0217906	-0.0915703	0.451528	7	0.242926	-0.426067	8.18623	12	11.05	10.4
1890											-1.25526	-0.426464	-0.986159	0.192766	-1.06543									1.04195	-0.397842	-0.371878				-0.70811	-0.413777	0.811153	7	0.187134	-1.01469	7.60898	11.1667	10.25	10.075
1891											-0.684905	-1.61507	-1.66962	-0.985495	-1.95284									0.270926	2.4466	-0.764572				-1.38159	-0.598629	1.53843	7	0.541059	-1.73832	7.43179	11.0667	9.5	9.725
1892											1.23113	-0.997386	-0.24359	-1.25226	-1.51891									-0.271508	3.24069	-0.197447				-0.556202	0.0268818	1.68403	7	1.27443	-1.22067	6.75951	10.4	8.375	9.275
1893											0.748954	-0.266512	0.486412	0.531871	-0.201163									-0.173037	-0.419233	1.23499				0.259913	0.101042	0.470132	7	0.44932	-0.247237	7.21262	11.5333	9.75	9.425
1894											0.971016	1.38663	0.902106	-1.22163	0.0697225									0.075418	0.771599	-0.322465				0.421568	0.422122	0.868945	7	1.06585	-0.221601	8.98	13.9333	12.05	11.525
1895											1.19424	2.50272	0.685747	4.11155	-1.03266									0.619568	1.52384	-2.0723				1.49232	1.37214	1.61544	7	2.56887	0.175411	8.373	12.2333	11.425	10.7
1896											-0.474794	1.25798	-1.99607	0.821936	2.15109									-1.27856	2.34124	-1.21313				0.35203	0.403262	1.68685	7	1.6529	-0.846375	8.44384	12.6667	10.6	11.2
1897											-0.223796	0.238157	-0.443473	-0.085801	1.61885									0.276548	1.47454	-1.36215				0.220788	0.407861	0.818312	7	1.01408	-0.198353	8.53019	12.2333	11.15	10.925
1898											-0.453854	-0.160231	0.0132681	0.316889	1.4338									-1.45093	0.785106	-0.242736				0.229975	0.0691509	0.919796	7	0.750545	-0.612244	7.88672	11.7333	10.125	10.425
1899											1.34013	-0.127001	-0.38132	-0.306089	1.4721									-1.39221	0.41262	0.292491				0.399563	0.145461	1.01478	7	0.897218	-0.606296	7.56273	11.7	9.25	10.2
1900											-0.606682	-0.545854	-0.388629	-0.946013	0.544286									-1.02882	0.133802	0.589362				-0.388578	-0.405416	0.567757	7	0.015184	-0.826016	7.2624	11.1333	9.4	9.6
1901											-1.00553	0.657942	1.01415	0.787639	0.354941									-0.59036	0.191624	-1.50183				0.361828	0.201486	0.743854	7	0.752541	-0.349569	10.0922	14.5	12.425	12.8
1902											-0.983717	-0.703661	-0.295683	-0.589542	-0.571924									0.231413	-0.449637	-1.07034				-0.628905	-0.480393	0.379738	7	-0.199079	-0.761707	6.34018	9.86667	8.225	8.725
1903											1.07634	-0.918883	-0.374801	-0.90014	1.44657									-0.405877	0.692569	0.947435				0.0658159	0.0879673	0.969223	7	0.805977	-0.630043	7.03713	10.6	9.15	9.65
1904											1.12541	-0.203	-0.193273	-0.634665	-0.509686									0.137693	-2.07507	-0.0279714				-0.0830428	-0.336085	0.961068	7	0.375884	-1.04805	7.23897	10.6667	9.075	9.7
1905											-0.174933	-0.19949	0.547485	-0.283768	-0.984624									-0.115685	-0.231046	0.719235				-0.219066	-0.206009	0.445315	7	0.123886	-0.535903	7.92753	12.1333	10.45	10.6
1906											1.53497	-0.401064	-0.0197628	0.506334	-0.122428									-0.319101	0.236191	1.20658				0.29961	0.202163	0.665866	7	0.695443	-0.291117	8.17735	12	10.425	10.65
1907											1.40945	-0.863456	0.0690309	-1.07686	0.180038									-0.075067	0.550278	1.68311				-0.0563609	0.0276295	0.839842	7	0.649793	-0.594534	7.35311	10.9667	9.025	9.675
1908											-1.97389	-0.346335	0.523797	0.588741	-0.03004									-0.429654	0.115474	-1.67424				-0.247546	-0.221701	0.865251	7	0.419286	-0.862689	7.9884	11.9333	9.9	10.5
1909											-0.851608	-0.032831	0.280732	0.493745	-1.18539									-0.301952	-0.80482	-1.61295				-0.259071	-0.343161	0.628313	7	0.1223	-0.808621	8.04884	11.9	9.65	10.625
1910											-1.85944	0.214675	0.743653	-1.00861	0.220182									0.280891	-0.0373135	-0.109077				-0.337907	-0.206565	0.904063	7	0.463174	-0.876304	8.25779	12.1333	10.65	10.825
1911											-0.584531	-0.47436	0.547316	-1.88256	1.39744									-0.396846	-0.434666	-1.32599				-0.199339	-0.261172	1.01915	7	0.493827	-1.01617	8.36595	12.2	11.025	11.025
1912											0.103773	0.280359	0.785172	1.37472	0.268952									-0.695721	0.418267	0.551994				0.562596	0.362218	0.633591	7	0.831588	-0.107153	8.94717	13.5333	11.525	11.675
1913											-0.33734	0.0631244	1.01177	-1.35389	0.034706									0.0347523	-0.163069	0.955097				-0.116326	-0.101421	0.698986	7	0.416395	-0.619237	8.54496	12.5667	10.875	11.175
1914											1.02223	0.119539	2.31415	-0.177997	0.641766									-0.125434	0.473474	-0.606008				0.783938	0.609676	0.865647	7	1.25096	-0.0316045	9.00623	13.4	11.15	11.825
1915											-0.23058	-0.276138	0.474774	-0.342475	0.102553									-0.629778	0.53149	-1.25741				-0.0543731	-0.0528791	0.436304	7	0.270339	-0.376097	7.13383	11.2	9.15	9.65
1916											0.59045	-0.0946644	0.46004	-0.520594	0.416493								0.520123	1.51071	-0.251598	0.975208				0.170345	0.32887	0.628438	8	0.764355	-0.106616	7.90108	12.3667	10.225	10.575
1917											0.862212	-0.100498	0.802568	0.834456	0.14464								-0.0856224	0.632132	0.593091	-0.524209				0.508676	0.460372	0.410226	8	0.744645	0.1761	8.93143	13.7	11.05	11.775
1918											0.848942	0.213928	1.25974	1.26065	0.20426							1.14169	1.18665	0.377516	0.153691	1.55115				0.757505	0.738564	0.494069	9	1.06136	0.415772	7.94136	11.9	10.4	10.25
1919											0.846537	0.799942	2.3424	-0.0861043	1.42003							0.713468	-0.237391	0.405225	-0.852608	0.894739				1.06456	0.594611	0.944838	9	1.21191	-0.022683	8.54078	12.3667	11.375	10.975
1920											-0.655809	0.00569448	0.195838	0.321081	0.197703							-0.211269	-0.220728	-0.102669	-0.985214	2.33585				0.0129015	-0.161708	0.425712	9	0.116424	-0.43984	8.34015	11.8	10.75	10.85
1921											-1.47828	-0.262585	-0.447578	-0.0582061	1.31144							0.70213	0.713393	1.58007	-0.986609	-0.0350332				-0.187042	0.119308	1.03209	9	0.793606	-0.55499	7.24483	10.6333	9.975	9.5
1922											-0.68877	0.634292	0.379025	0.352009	0.654092							-1.27055	-1.07163	1.7673	-1.36225	-0.745571				0.26613	-0.0673878	1.07663	9	0.63601	-0.770785	8.07359	11.9667	10.375	10.65		1860-1992		Column 1	Column 2	Column 3	Column 4	Column 5	Column 6	Column 7
1923											-1.25432	-0.514874	-1.19747	-0.424651	-0.143684							0.118416	0.0923165	0.60932	-0.898527	-0.140433				-0.707	-0.401497	0.634793	9	0.0132338	-0.816229	6.68389	10.0333	8.5	9.15			Column 1
1924											0.00277185	0.0902079	1.28279	2.67749	0.728023							-0.21511	0.845478	0.664738	-1.31571	-1.44122				0.956258	0.528965	1.10502	9	1.25091	-0.19298	8.51597	12.2667	10.225	11.25			Column 2	0.732077
1925											0.664902	1.01349	1.3115	2.26864	-0.358968							-0.889795	0.343226	-1.39555	-1.22188	-0.723876				0.979911	0.19284	1.24901	9	1.00886	-0.623182	9.01304	13.4	11.65	11.825			Column 3	0.443189	0.525247
1926											-0.673932	-0.103635	-0.691876	0.400122	0.270038							0.0876118	0.810025	-1.57376	-1.68843	0.282083				-0.159857	-0.351537	0.87004	9	0.216889	-0.919963	8.51347	13.1667	10.9	11.425			Column 4	0.576985	0.50199	0.551242
1927											0.0834157	0.204691	-0.462517	0.309606	1.19546							-1.32488	-0.971286	0.329701	-0.920252	-0.44235				0.266132	-0.172895	0.80413	9	0.35247	-0.69826	8.50232	13.1	10.7	11.325			Column 5	0.448278	0.41746	0.474099	0.729554
1928											-1.20144	-0.406316	-1.81419	-0.65395	-0.596386							-0.496058	-0.764795	-0.561737	1.27039	-1.10056				-0.934457	-0.580498	0.822405	9	-0.0431933	-1.1178	6.76968	10.1333	8.75	9.2			Column 6	0.131999	0.216742	0.155456	0.241658	0.44508
1929											-1.8752	-0.995411	-1.99026	-1.21795	-0.0314184							0.788469	1.02801	-0.47231	0.207399	-0.849819				-1.22205	-0.506518	1.09477	9	0.208735	-1.22177	7.24473	10.4667	9.4	9.575			Column 7	0.0962013	0.143729	-0.0956281	-0.00346756	0.291243	0.694941
1930											0.132984	0.842793	-0.28439	0.707554	-1.21907							0.623971	-0.896389	0.810289	-0.0778306	-0.11266				0.0359736	0.0711008	0.75875	9	0.566818	-0.424616	9.61151	14.4333	12.775	12.175			Column 8	0.147448	-0.0314352	0.335396	-0.114345	-0.0245755	0.188698	0.0413535
1931											-0.929416	-0.0716193	-0.743166	-0.182051	-1.3225							-1.00237	-1.48487	0.468379	2.34811	-0.169906				-0.64975	-0.324389	1.18316	9	0.448607	-1.09739	7.25907	11.1333	10.05	9.5			Column 9	0.203891	0.154547	0.069154	0.0213036	0.403484	0.598944	0.473687
1932											-0.450005	0.680246	0.128695	0.897837	1.2432							-1.99824	-1.92607	-0.99795	1.28762	1.62132				0.499994	-0.126074	1.28681	9	0.714639	-0.966787	7.9516	12.1	10.55	10.5			Column 10	0.551435	0.547883	0.275756	0.229348	0.426379	0.523027	0.218174
1933											0.999286	1.94376	1.92717	1.71722	-0.188242							-1.1757	-1.61321	0.0528323	1.5271	-0.103516				1.27984	0.576692	1.36021	9	1.46536	-0.311981	9.70638	14.1	12.125	12.475			Column 11	0.146852	0.0551178	-0.206622	-0.0159661	0.333715	0.0988149	0.279256
1934											1.26232	2.60935	0.545211	1.39128	0.230465							-0.476902	-1.03333	0.936028	1.49974	1.12619				1.20773	0.773796	1.10227	9	1.49394	0.0536486	9.81629	13.6667	12.125	12.75			Column 12	0.317178	-0.0453758	-0.124963	0.0062772	0.0480453	0.0247629	0.280516
1935											-0.884669	0.758204	-1.39223	-0.28641	1.24283							0.0980008	0.148836	0.581463	2.18937	3.1475				-0.112456	0.272821	1.08488	9	0.981612	-0.435969	7.7098	11.7667	9.55	10.25			Column 13	-0.0465326	-0.130552	-0.209578	-0.0234746	0.348825	0.0227832	-0.0280345
1936											0.286047	1.57768	-1.80606	1.56233	2.38498							1.02865	1.05108	0.805279	-0.488168	0.761596				0.800997	0.711313	1.24789	9	1.5266	-0.103972	9.26747	13.6	12.05	11.925			Column 14	-0.0358416	-0.145404	-0.294912	-0.0276428	0.134183	0.412148	0.531053
1937											2.48925	3.13	-0.0712706	2.18819	0.0458064							2.34834	1.85047	-0.364136	0.838718	0.723516				1.55639	1.38393	1.29065	9	2.22715	0.540704	10.2725	14.9333	13.5	12.85			Column 15	0.15548	0.085615	-0.110581	0.0927185	0.125898	-0.102862	0.249908
1938	0.568317										0.81994	0.608862	-0.749739	0.202233	0.49974							0.376297	1.22693	-0.434743	-0.184794	-2.05834		0.568317		0.276207	0.293305	0.598942	10	0.664533	-0.0779236	9.12378	13.2333	11.25	11.875
1939	-0.135548										0.263524	0.780784	1.63202	-0.707684	2.82839							-1.14991	-0.742964	-1.45554	0.55286	-2.45917		-0.135548		0.959408	0.186594	1.32547	10	1.00813	-0.634943	8.56475	12.8333	10.725	11.375
1940	-0.923387	-1.0108									-1.13664	0.378605	1.18836	-1.51667	1.57234							0.730223	0.183588	-0.505616	-0.561251	-0.68028		-0.967093		0.0971998	-0.145568	1.01975	11	0.457066	-0.748201	8.54825	12.4	11.425	10.8
1941	-0.185884	0.271078									-0.768321	0.933865	0.934128	1.07375	1.11171							0.868941	-0.971277	-0.28224	-1.07843	1.37791		0.0425971		0.657026	0.173392	0.862687	11	0.683208	-0.336423	8.27152	12.4667	10.725	10.925
1942	0.409114	-0.0455352									-0.696313	0.548944	0.504606	0.0407574	0.332083							0.406277	-0.341496	1.50034	0.178151			0.18179		0.146015	0.257903	0.561693	11	0.589842	-0.074037	7.70989	11.5667	9.775	10.275
1943	0.0429939	0.359398									-0.290279	0.731364	-0.182163	-0.292619	-1.12841					-0.112218	0.618664	0.917095	0.218583	0.897892	0.150658			0.201196		-0.232422	0.148535	0.575077	13	0.461151	-0.164081	8.64108	12.5333	10.925	11.125
1944	-0.17287	-0.667489									-0.444636	0.488847	-0.332446	-0.968499	-0.0624261					-0.346073	0.633055	2.35243	1.94625	0.70839	0.108269			-0.420179		-0.263832	0.249446	0.979433	13	0.781872	-0.28298	7.98563	11.7333	9.725	10.575
1945	1.02487	0.63793									-1.69402	2.03054	0.793068	-0.822772	0.543891					0.617275	0.0308408	0.0978835	0.483538	0.691465	-0.454083			0.831401		0.170141	0.306187	0.919364	13	0.805958	-0.193585	8.85047	13.5333	11.525	11.65
1946	0.281577	0.0134983									2.77158	1.08882	-0.0599689	0.069303	-0.18066			0.513075		0.73164	0.0531941	0.251906	0.830808	-0.40537	0.213939			0.147538		0.737816	0.440953	0.785969	14	0.852669	0.0292375	8.84662	12.7	11.1	11.6
1947	2.33386	2.02152									3.03818	0.68291	-1.40969	0.0536826	1.69583			0.524641		1.0227	0.403668	0.21971	0.015741	1.9906	-0.554048			2.17769		0.812182	0.85995	1.22616	14	1.50225	0.217647	9.87012	14.1667	12.525	12.75		1860-1997		Column 1	Column 2	Column 3	Column 4	Column 5	Column 6	Column 7
1948	0.444085	0.567433									0.572217	-0.408836	-0.564826	-1.14315	1.38726			-2.16399		-1.36636	-0.561559	-0.193565	-0.0238326	0.293625	3.5026			0.505759		-0.031468	0.0243641	1.35344	14	0.733339	-0.684611	7.99831	11.7	10.45	10.525			Column 1
1949	-0.0141359	0.082399									-0.753868	-0.536522	-0.613012	-1.83304	1.11856			-0.0501938		-1.75126	-1.51281	0.925506	1.78727	-1.75181	-1.57251			0.0341315		-0.523577	-0.462531	1.17033	14	0.150524	-1.07559	8.29351	11.4333	10.175	11			Column 2	0.748162
1950	1.44548	0.392831							-0.258173		0.508497	1.17101	-1.05258	-0.575421	-1.03167			0.120265		1.14888	-0.421209	-3.54681	-0.0851563	-0.0882533	0.328847			0.919156	-0.258173	-0.196033	-0.129564	1.20732	15	0.481423	-0.740551	8.77228	12.8	10.975	11.5			Column 3	0.589984	0.551639
1951	-0.832416	-0.715615	-0.895811						1.38491		0.821744	-1.78425	0.862227	-1.11021	-1.75942			-0.168154		0.920043	0.454512	-1.96038	0.755093	-0.855216	-0.97964			-0.814614	1.38491	-0.593983	-0.366412	1.0922	16	0.168765	-0.901589	7.8531	11.3333	9.375	10.6			Column 4	0.663245	0.508743	0.66003
1952	-0.427913	0.739823	1.12721						-1.72196		0.503965	-1.02609	0.139348	-1.62842	-1.00019			0.829967		-1.01365	1.09711	0.838561	-2.05666	-0.193547	-1.10855			0.479708	-1.72196	-0.602277	-0.306312	1.08206	16	0.223896	-0.83652	7.08955	10.8667	9.6	9.4			Column 5	0.622211	0.526449	0.694658	0.786791
1953	0.240917	0.991232	1.10033						0.731745		1.98072	-1.70412	-0.709029	0.197468	-1.0639			0.245031		0.578823	0.0212847	-0.964307	-1.20626	0.0633716	-1.01768			0.777493	0.731745	-0.259773	-0.032148	1.00304	16	0.45934	-0.523636	9.55719	14.0333	11.975	12.15			Column 6	0.167613	0.240919	0.231872	0.308288	0.531025
1954	0.0881914	0.222139	-0.381738						-0.519631		1.81749	-0.918773	-1.21154	-0.505775	-1.28944			-0.01625		0.356726	-0.716798	-1.44895	-0.629806	0.56773	-0.660262			-0.0238026	-0.519631	-0.421609	-0.327918	0.823884	16	0.0757846	-0.731622	8.45785	12.3667	11.425	10.95			Column 7	-0.0490694	0.0140089	-0.340915	-0.216575	-0.115696	0.361423
1955	-0.498319	-0.955619	-0.777403			-0.0844879	0.0367608		-0.056235		-0.111871	-0.189302	-0.680868	-0.161251	0.662506			1.28098		-1.54053	0.0818549	-0.70263	0.208597	-0.920413	-0.548639			-0.74378	-0.0346541	-0.0961573	-0.275382	0.646054	18	0.0230801	-0.573843	8.33009	12.3	9.925	11.4			Column 8	0.224257	0.037748	0.471029	0.0418289	0.168839	0.28526	-0.286696
1956	-1.12202	-0.848184	-0.964535			-0.303628	0.000970354		-0.77647		-0.0995428	-2.33974	-0.70334	-0.825503	-0.430957			1.03845		-0.49966	-1.20218	2.23612	-1.02572	-0.522469	0.16137			-0.978247	-0.359709	-0.879817	-0.457057	0.964497	18	-0.0114823	-0.902633	7.76382	11.3	10	10.225			Column 9	0.248424	0.192149	0.191257	0.13922	0.518628	0.625522	0.100007
1957	-1.28848	-0.0763687	-0.790925			-0.453787	-0.613761		-0.13941		-0.230273	-2.28159	-1.10087	-0.638253	-1.61381			-0.180935		-0.595801	-0.524681	0.619354	-1.59396	0.356915	0.21784			-0.718591	-0.40232	-1.17296	-0.607155	0.74765	18	-0.261759	-0.952552	7.49729	11.3667	9.575	9.975			Column 10	0.551336	0.551347	0.278433	0.240368	0.418624	0.510531	0.0943357
1958	-1.06965	0.240073	0.145528			-0.0964767	-0.819692		0.105259		-0.616291	-2.15549	1.72315	-0.983904	-1.07278			-0.562061		-1.11388	-1.21895	-0.42259	-0.630384	0.32083	-0.271822			-0.228015	-0.270303	-0.621063	-0.472173	0.833545	18	-0.0870951	-0.857251	8.12334	11.6333	9.775	10.825			Column 11	0.146852	0.0551178	-0.206622	-0.0159661	0.333715	0.0988149	0.279256
1959	-0.611641	0.0843844	0.108968			2.00704	-0.249708		0.562407		-0.308802	-2.15093	-0.459554	0.725887	-1.20481			-0.140973		1.86505	-0.630701	0.772268	1.11407	-0.086402	-1.29875			-0.139429	0.773248	-0.679643	0.00543356	1.06104	18	0.495611	-0.484743	8.60051	12.6	10.9	11.175			Column 12	0.317178	-0.0453758	-0.124963	0.0062772	0.0480453	0.0247629	0.280516
1960	0.538008	1.81398	0.608664			0.868334	0.865071		2.58154		-0.972	0.01935	-1.2693	0.0525787	-0.813471			-0.399683		2.05062	0.896864	0.373891	1.85229	0.654436	-0.092186			0.986885	1.43831	-0.596568	0.534944	1.06726	18	1.02799	0.0418959	8.92116	13.1333	11.775	11.75			Column 13	-0.0465326	-0.130552	-0.209578	-0.0234746	0.348825	0.0227832	-0.0280345
1961	0.783445	1.08438	0.565269			-0.264524	0.281859		0.290814		-1.22172	-0.77269	-0.832083	-0.327771	-0.843234			-0.456936		0.181135	-0.538554	-0.0740926	0.582097	1.56025	-0.845872			0.811032	0.102717	-0.7995	-0.047124	0.764259	18	0.305946	-0.400194	8.84556	12.4667	10.7	11.35			Column 14	-0.0358416	-0.145404	-0.294912	-0.0276428	0.134183	0.412148	0.531053
1962	-0.330734	-0.338009	0.640504			-2.32676	-1.27335		-0.637565		-1.3215	-1.08231	-0.922916	-1.62801	0.187288			-0.711521		-0.963264	0.984379	-0.443952	-0.0909243	1.84406	-1.53482			-0.00941291	-1.41256	-0.95349	-0.552745	1.01158	18	-0.0854203	-1.02007	7.00615	10.3667	9	9.175			Column 15	0.15548	0.085615	-0.110581	0.0927185	0.125898	-0.102862	0.249908
1963	-1.38729	-0.452835	0.863807			2.47952	1.2072	0.15322	-0.603715		-0.617893	-0.759005	-1.24036	0.300961	-0.101381			0.264548		0.129143	1.32061	-0.128588	-0.209946	2.05367	0.192214			-0.325439	0.809056	-0.483536	0.182309	1.02688	19	0.64405	-0.279431	8.7535	12.0667	11.375	11.25
1964	-0.741259	-0.436063	0.0680818	-0.207983		-2.71431	-1.58794	-0.326292	-2.3728		-0.85337	-1.12555	0.153131	-0.496697	-0.605577			-0.449624		0.297257	-0.507205	-0.355879	0.337648	1.0175	-0.341174			-0.329306	-1.75034	-0.585613	-0.562405	0.878376	20	-0.17744	-0.947371	7.14644	10.4333	9.55	9.2
1965	-0.35141	0.368517	0.347	0.41853		0.00843548	-0.31499	-0.0554684	-0.891403		-1.25934	-1.20341	0.228417	-0.669068	0.441131			-0.234206		0.581709	0.47399	0.674836	-0.548321	0.409333	-0.167353			0.195659	-0.313356	-0.492453	-0.0871534	0.58929	20	0.171114	-0.345421	7.9729	11.2333	9.425	10.625
1966	1.1723	0.254931	1.3061	1.38125		0.373913	-0.830489	-0.313779	-0.151949		-1.75103	-0.752632	-1.63149	0.269022	-0.571353			-1.19303		0.468536	-0.414397	-0.237539	0.42742	0.509982	0.686157			1.02864	-0.230576	-0.887497	-0.0499043	0.901227	20	0.345076	-0.444885	8.36984	12.8333	10.875	10.8
1967	-1.15263	-0.779849	0.46682	-0.888611	0.00771267	0.265696	-0.267641	-0.178791	1.85676		-0.358991	-0.688702	0.13631	0.223831	-0.207728		-0.588525	0.849872		-0.604301	0.324639	0.250139	0.0369797	-0.0165603	-0.67672			-0.469312	0.419005	-0.179056	-0.0904679	0.660534	22	0.185552	-0.366487	8.28732	11.8667	10.2	11.025
1968	0.149986	-1.12237	-0.276209	-0.907768	0.484183	-0.672348	-0.855238	0.834039	0.995724	-0.549396	0.557172	-0.630912	1.64444	-0.503068	-0.0280042		0.580808	0.221866		-0.877288	1.75191	0.261242	-2.09276	-0.641263	0.469785			-0.334435	-0.0494437	0.207925	-0.0524117	0.91696	23	0.322339	-0.427162	7.6486	11.8333	9.725	10.475				0.171581
1969	-0.559228	-1.49756	0.14679	-0.545075	-0.0753272	-0.470865	0.00339684	2.05461	0.208724	-0.396048	0.506956	0.563358	-0.220353	0.700315	0.545324		1.38032	0.95195		-1.27021	0.969171	-1.04964	-0.866496	-0.477195	0.418528			-0.506081	0.279963	0.41912	0.0444102	0.866245	23	0.398434	-0.309614	9.31549	14.0667	11.65	12.1				0.7565
1970	-1.4311	-1.6822	-1.14663	-0.837318	-0.0255384	0.0954557	0.195539	-0.585542	0.204271	0.47717	0.767259	0.689138	0.417377	1.18614	-0.344318		0.911784	0.91633	0.0619678	-1.31577	-1.07084	0.570698	-0.65091	-3.21656	-0.661636			-1.02456	0.0773786	0.543119	-0.269802	1.03538	24	0.144438	-0.684042	9.1611	13.6333	11.75	11.775
1971	-1.05779	-1.62688	-1.08089	-0.700133	-0.841936	-0.559775	-0.239088	-0.539495	-1.24124	0.082949	-0.477604	-0.173457	-0.854693	1.03615	-0.489927		-1.44496	0.824951	0.357759	0.682483	1.21202	0.778081	0.126363	-2.56532	-0.874306			-1.06153	-0.499329	-0.191907	-0.402781	0.921925	24	-0.0339342	-0.771628	7.76828	11.6	10	10.25
1972	1.2667	0.0124317	-0.46413	0.0152284	-0.0217373	0.471956	0.882764	0.17667	0.147416	-0.686626	0.857246	1.02751	-0.423414	1.39356	-0.322546	0.683643	0.0440195	0.392174	-0.528059	1.7726	0.639792	-0.0488327	-0.113386	-1.56349	1.61751			0.161698	0.198436	0.50647	0.28916	0.785343	25	0.597014	-0.0186944	9.1086	13.5667	11.5	11.725
1973	-1.42081	-0.905411	-0.572195	-0.470015	0.238283	0.780654	1.2217	0.700347	0.536079	-0.936027	-0.350729	-0.090269	-1.2846	0.557191	0.0746018	-0.919913	-0.792309	-0.313216	-0.144509	1.28577	-0.00629901	-0.863806	-0.375865	-0.527308	0.958551			-0.62603	0.460551	-0.218761	-0.144804	0.766575	25	0.155693	-0.445301	8.43	13.2	11.25	10.95
1974	0.573871	-0.0941512	-1.03833	-0.536455	-1.04423	0.32291	1.09505	-0.303335	0.779189	-1.00949	0.517382	-0.0855075	0.149364	0.466261	0.861217	-0.0793645	-0.6328	0.308724	0.0954862	0.221992	-0.66547	-0.477296	0.386719	-0.935814	1.3183			-0.42786	0.176866	0.381743	0.00776873	0.679012	25	0.273941	-0.258404	8.73191	12.3333	10.975	11.475
1975	-0.340508	-1.37874	-0.68094	-0.173008	-0.234804	0.223109	0.843495	-0.184389	0.121364	0.737295	0.188014	-0.255549	0.562527	0.369625	-0.683077	0.249201	-0.502388	-0.72528	-0.229165	0.052455	0.143104	-0.416802	-0.245003	-0.730277	0.00340511			-0.561599	0.348175	0.0363081	-0.131453	0.50789	25	0.0676396	-0.330546	7.89618	11.2667	9.975	10.425
1976	-1.67132	-1.21274	-0.572202	0.0156849	-0.331772	0.400166	0.254203	-1.35611	-0.102416	-1.25388	-0.117496	0.626842	0.0830343	1.8749	0.379556	-1.3958	-0.00514548	-2.26828	-1.62099	1.08321	0.190823	-0.33774	-0.450293	0.592756	1.44832			-0.75447	-0.411607	0.569368	-0.229867	1.01646	25	0.168587	-0.628321	7.84628	12.1333	11.15	10.05				Column 1	Column 2	Column 3	Column 4	Column 5	Column 6	Column 7
1977	-0.418624	-0.514082	-0.454682	0.305866	0.000419209	0.177613	0.0131591	-1.44437	-0.206017	-0.529968	0.242123	-0.649919	2.21748	0.703543	-0.470434	-1.13876	-0.79729	0.514831	-1.57366	-1.05202	-1.192	-0.288849	-0.215374	1.51973	0.452188			-0.21622	-0.397916	0.408559	-0.191964	0.871295	25	0.149584	-0.533511	7.56895	11.3333	9.525	10.05		not the grey	Column 1
1978	1.21323	0.847965	-0.932098	1.02527	0.943036	0.32437	0.116098	-1.14084	-0.137469	1.89794	-0.520803	-0.383585	3.36031	0.836306	0.484935	1.03124	-0.356772	0.00227426	0.517795	-0.859955	-1.16547	1.99605	0.595034	0.692781	0.670652			0.619479	0.212019	0.755433	0.442331	1.05316	25	0.855169	0.0294928	8.0067	12.0333	10.35	10.45			Column 2	0.748162
1979	1.2768	1.11659	0.329941	1.4689	2.30859	1.18178	0.708455	-0.855885	1.45715	1.78581	0.21483	0.00957474	0.340752	-1.10675	-0.181193	1.74223	0.549221	-0.0777151	1.6456	-1.31213	-0.553744	0.225855	0.304514	1.39413	0.743069			1.30016	0.855462	-0.144557	0.588655	0.955088	25	0.96305	0.214261	8.39564	12.6667	10.925	11			Column 3	0.589984	0.551639
1980	-0.656397	-0.966139	0.126662	0.987226	1.17927	0.392177	0.530061	0.995887	0.855313	-0.904374	2.56613	1.40346	0.64402	1.2975	-0.205716	1.37564	1.67027	-1.94311	1.50219	-0.404393	0.133455	-0.640743	0.454153	-1.89546	0.072203			0.134124	0.373813	1.14108	0.342771	1.11037	25	0.778037	-0.092494	9.53634	13.9667	11.975	12.475			Column 4	0.663245	0.508743	0.66003
1981	-0.0277557	-0.502459	-0.0853623	0.550986	0.58773	-0.00731043	-0.424247	0.121428	0.0923169	-0.705423	-0.0776837	-0.509454	1.00496	0.886692	-1.65855	-0.468677	0.430722	-0.584773	0.592698	-0.739701	-0.665879	-0.0231854	1.35536	-2.10471	-0.479471			0.104628	-0.184647	-0.0708071	-0.13767	0.778229	25	0.167396	-0.442736	7.93669	11.3667	10.575	10.35			Column 5	0.622211	0.526449	0.694658	0.786791
1982	-1.07627	-1.54803	0.00779824	0.0404187	-1.02758	-0.522158	-1.31159	0.837988	-0.437752	-1.19807	-0.179651	0.250357	-2.35446	-2.22712	-1.66028	-0.129187	-0.631646	0.261177	0.583744	-0.111704	0.380117	0.230042	2.19667	1.77769	0.0222339			-0.720732	-0.526317	-1.23423	-0.31309	1.09658	25	0.116767	-0.742948	7.74107	11.4667	9.875	10.275			Column 6	0.167613	0.240919	0.231872	0.308288	0.531025
1983	-0.83506	-0.378911	0.121158	0.286512	-0.333564	-1.434	-1.07286	-0.908957	-1.24222	-1.57731	1.04868	0.943548	0.81091	-0.606274	1.27296	-0.394013	0.472557	1.49517	0.710914	1.1991	-3.00646	1.23915	1.01824	1.81371	-0.577852			-0.227973	-1.24707	0.693965	0.00260543	1.18217	25	0.466017	-0.460807	8.03649	11.4667	10.55	10.45			Column 7	-0.0490694	0.0140089	-0.340915	-0.216575	-0.115696	0.361423
1984	0.675635	0.299816	-0.144694	0.185219	-0.843154	-1.28743	-0.9594	-0.0157966	-1.20212	-1.03702	-1.19305	-0.294478	-1.78743	-1.46855	-0.264122	0.436151	0.333409	1.6894	1.21073	-1.63174	-1.69397	0.799483	1.23026	-0.620753	-0.62656			0.0345647	-0.900353	-1.00153	-0.328407	0.994367	25	0.0613855	-0.718199	8.2212	11.8667	11.45	10.4			Column 8	0.224257	0.037748	0.471029	0.0418289	0.168839	0.28526	-0.286696
1985	0.523826	0.512123	-0.683995	-0.171696	-0.688892	-0.585116	-0.977196	0.124853	-0.242864	0.089683	0.538844	-0.0472101	-0.817502	0.691789	-0.421103	0.0243651	0.101534	1.27237	-0.593365	2.02163	2.01169	-0.918648	-0.046814	-0.515495	0.134227			-0.101727	-0.318128	-0.0110364	0.0534818	0.808275	25	0.370326	-0.263362	8.13494	12.2	10.15	10.6			Column 9	0.248424	0.192149	0.191257	0.13922	0.518628	0.625522	0.100007
1986	0.0601081	-0.714331	0.0220063	-1.03636	-0.797413	0.189032	-0.810355	0.732005	0.168905	0.473286	-1.06988	-0.0232112	3.11826	-1.15134	-2.05235	-0.844269	-0.547385	-0.138696	-0.56834	-0.618978	0.326381	0.582706	0.125778	1.38482	-0.956503			-0.493197	0.150575	-0.235704	-0.165845	1.00946	25	0.229863	-0.561553	8.21031	12.2667	11.05	10.275			Column 10	0.551336	0.551347	0.278433	0.240368	0.418624	0.510531	0.0943357
1987	-0.517882	0.0338534	-0.217403	-0.799288	-0.74827	-0.502221	-0.909671	-0.528664	-0.359893	0.469631						-1.28902	-1.50448	-2.46702	-0.968039	-0.0849561	-0.627255	-0.788164	-0.329375	-0.715119	-0.761255			-0.449798	-0.366164		-0.680725	0.612439	20	-0.412312	-0.949138	7.36486	10.7	9.275	9.525			Column 11	0.146852	0.0551178	-0.206622	-0.0159661	0.333715	0.0988149	0.279256
1988	1.26323	1.78396	1.56286	0.456105	0.331118	1.32375	0.493851	2.02505	1.38891	1.69563						1.00259	1.50762	1.92073	0.62693	0.791497	2.18285	0.356024	0.386308	-1.57435	1.4438			1.07946	1.38544		1.04842	0.859824	20	1.42526	0.671588	9.31776	13.4667	11.725	12.075			Column 12	0.317178	-0.0453758	-0.124963	0.0062772	0.0480453	0.0247629	0.280516
1989	0.16981	-0.333672	-0.756899	-0.46243	-0.674403	1.19623	0.105368	1.76153	1.44562	0.857792						0.568509	-0.61924	0.396432	-0.614185	0.390457	0.840914	0.928924	0.94717	-0.89392	0.172572			-0.411519	1.07331		0.271329	0.793711	20	0.619188	-0.0765302	8.31974	12	10.65	10.875			Column 13	-0.0465326	-0.130552	-0.209578	-0.0234746	0.348825	0.0227832	-0.0280345
1990	1.83114	0.270402	2.4084	1.32151	1.08684	0.309856	-0.245827	0.942197	0.297909	0.962346						-0.0903557	1.0277	-0.191414	-1.64318	-0.593218	-0.127611	0.168686	0.158518	0.109887	0.30763			1.38366	0.453296		0.41557	0.891147	20	0.806133	0.0250076	8.87587	12.9	11.475	11.375			Column 14	-0.0358416	-0.145404	-0.294912	-0.0276428	0.134183	0.412148	0.531053
1991	1.82389	2.37462	1.12635	1.3101	1.41663	0.294738	-0.0749343	-0.0764238	-0.220823	0.876508						1.58964	1.50651	-0.247535	0.621348	0.667214	1.36928	-0.349947	0.31053	0.909556	1.14173			1.61032	0.159813		0.818449	0.774228	20	1.15777	0.479129	8.39113	12.8	10.75	11			Column 15	0.15548	0.085615	-0.110581	0.0927185	0.125898	-0.102862	0.249908
1992	-0.105106	0.8521	-0.223559	-1.35084	-0.476826	-0.0304956	0.977919	-0.179322	-0.563717	0.74047						-0.0678898	0.311325	0.870024	1.39895	0.231397	0.441483	0.0458313	0.974947	0.296105	0.413439			-0.260845	0.188971		0.227812	0.64612	20	0.510986	-0.0553628	8.00008	11.7333	10.875	10.625			Column 16	0.660134	0.575473	0.269309	0.593113	0.597607	0.338115	0.261235
1993	-1.26253	-1.03903	-2.26074	-1.34677	-1.89243	-1.37105	4.00505	-2.46636	-2.12648	-0.362889										-0.570292	-0.963616	-0.89994	-0.73941	0.375312	0.437582			-1.5603	-0.464346		-0.780225	1.52838	16	-0.0313197	-1.52913	7.25688	10.9333	10.25	9.45			Column 17	0.36689	0.331402	0.558661	0.465756	0.57315	0.0963245	0.0957803
1994	2.05381	0.539889	2.81481	1.56587	1.51384																	-0.0445842	0.20174	0.731928	-0.366258			1.69764			1.00123	1.05279	9	1.68905	0.313407	8.31003	12.5333	10.65	10.95			Column 18	0.0809903	0.0375046	-0.0661535	-0.208614	-0.203905	-0.0398974	0.0255351
1995	2.04121	2.76134	1.45806	2.31973	1.85312																	1.62384	0.146631	1.71278	-0.346846			2.08669			1.50776	0.99905	9	2.16047	0.85505	8.1473	11.9667	10.25	10.625			Column 19	0.116208	0.263591	0.0202793	0.185618	0.280186	-0.0940165	0.104565
1996	0.046285	1.14679	0.0340338	-1.96316	-0.186322																	-1.0682	-2.35189	-1.01514	-1.66196			-0.184474			-0.779952	1.12901	9	-0.0423325	-1.51757	8.74093	12.8333	11.025	11.4			Column 20	0.163808	0.269139	0.0517459	-0.00127845	-0.193871	0.265564	0.0947023
1997	-1.15032	-0.854357	-2.10577	-1.25749	-1.70657																	-1.46234	-2.57585	-0.16176	0.602567			-1.4149			-1.18577	0.967564	9	-0.553625	-1.81791							Column 21	0.146143	0.114084	0.26791	-0.121593	0.0812249	0.251266	0.0373284
1998																									0.134564						0.134564		1									Column 22	0.0336407	0.0846178	0.148886	0.402524	0.311654	0.107286	-0.20808
1999																									-1.12504						-1.12504		1									Column 23	0.222823	0.084066	0.190146	0.450734	0.139725	0.135412	-0.105795
2000																																										Column 24	0.205097	0.338101	0.333269	0.336705	0.16483	-0.105222	-0.130919
2001																																										Column 25	0.164694	0.0432003	-0.116046	0.248897	0.113031	0.335179	0.431779
2002																															standard deviation			standard error
																															av	av stdev
																															0.012815	0.849188
																														range	0.862003	-0.836373		0.545904	-0.51741
																																											0.133472		0.13751		0.149559		0.16214
																														… in T	9.66945	7.21105		9.2079	7.67673								0.793846		0.792806		0.801776		0.802522
																														Delta T	2.4584			1.53117
																														+- T	1.2292			0.765586
																														in d18O	0.283226			0.176402
																																											Column 1	Column 2	Column 3	Column 4	Column 5	Column 6	Column 7
																														m	1.44752	8.42171	b								all 26	Column 1
																														std err m	0.187539	0.0769527	std err b									Column 2	0.748162
																														R^2	0.553801	0.5441	stdev of y									Column 3	0.589984	0.551639
																														F	59.5753	48	freedom									Column 4	0.663245	0.508743	0.66003
																														expl var	17.637	14.2102	unexpl var									Column 5	0.622211	0.526449	0.694658	0.786791
																																										Column 6	0.167613	0.240919	0.231872	0.308288	0.531025
																																										Column 7	-0.0490694	0.0140089	-0.340915	-0.216575	-0.115696	0.361423
																																										Column 8	0.224257	0.037748	0.471029	0.0418289	0.168839	0.28526	-0.286696
																																										Column 9	0.248424	0.192149	0.191257	0.13922	0.518628	0.625522	0.100007
																																										Column 10	0.551336	0.551347	0.278433	0.240368	0.418624	0.510531	0.0943357
																																										Column 11	0.146852	0.0551178	-0.206622	-0.0159661	0.333715	0.0988149	0.279256
																																										Column 12	0.317178	-0.0453758	-0.124963	0.0062772	0.0480453	0.0247629	0.280516
																																										Column 13	-0.0465326	-0.130552	-0.209578	-0.0234746	0.348825	0.0227832	-0.0280345
																																										Column 14	-0.0358416	-0.145404	-0.294912	-0.0276428	0.134183	0.412148	0.531053
																																										Column 15	0.15548	0.085615	-0.110581	0.0927185	0.125898	-0.102862	0.249908
																																										Column 16	0.660134	0.575473	0.269309	0.593113	0.597607	0.338115	0.261235
																																										Column 17	0.36689	0.331402	0.558661	0.465756	0.57315	0.0963245	0.0957803
																																										Column 18	0.0809903	0.0375046	-0.0661535	-0.208614	-0.203905	-0.0398974	0.0255351
																																										Column 19	0.116208	0.263591	0.0202793	0.185618	0.280186	-0.0940165	0.104565
																																										Column 20	0.163808	0.269139	0.0517459	-0.00127845	-0.193871	0.265564	0.0947023
																																										Column 21	0.146143	0.114084	0.26791	-0.121593	0.0812249	0.251266	0.0373284
																																										Column 22	0.0336407	0.0846178	0.148886	0.402524	0.311654	0.107286	-0.20808
																																										Column 23	0.222823	0.084066	0.190146	0.450734	0.139725	0.135412	-0.105795
																																										Column 24	0.205097	0.338101	0.333269	0.336705	0.16483	-0.105222	-0.130919
																																										Column 25	0.164694	0.0432003	-0.116046	0.248897	0.113031	0.335179	0.431779
																																										Column 26	-0.350723
																																											0.129082
																																											0.793965
																																											Column 1	Column 2	Column 3	Column 4	Column 5	Column 6	Column 7
																																										Column 1
																																									new ones	Column 2	0.631657
																																										Column 3	0.252035	0.165381
																																										Column 4	0.637521	0.389512	0.285206
																																										Column 5	-0.120449	-0.154876	-0.000736267	-0.22082
																																										Column 6	0.263325	0.158425	0.0943537	-0.0925879	0.293176
																																										Column 7	0.262121	-0.0867061	0.254005	0.254736	-0.208086	-0.113629
																																										Column 8	0.231779	-0.0642933	0.0200787	0.532551	0.171951	-0.1457	0.434688
																																										Column 9	-0.161593	-0.111528	-0.118188	-0.0753928	0.0788058	-0.0636307	0.112222
																																										Column 10	0.295847	0.282754	-0.200666	-0.0945035	0.0805133	0.136017	-0.100162
																																											0.0897698		0.106884		0.147308
																																											0.496534		0.518553		0.580193
[truncated: 19 more columns]

## Sheet: Tw
Stensele air T	YEAR	Jan	Feb	Mar	Apr	May	Jun	Jul	Aug	Sep	Oct	Nov	Dec	Ave	JJA	MJJA	JJAS	Jan	Feb	Mar	Apr	May	Jun	Jul	Aug	Sep	Oct	Nov	Dec	Ave	JJA	MJJA	JJAS	entire growing season (23May-12Oct), linear, proportionate	reco river water	weighted, gr.season	reco river water wt growing season Tw*	Yl. Kilankijok River / Ylinen Kihlankijoki	Bergmyrbäcken River	Rokån River	Akkarjåkkå River	Skellefteälv river T	Krycklan C12	Krycklan C15
		air T																water T																air T	weighted water T	air T	ERROR: 2.07°C	ERROR: 1.05°C	ERROR: 1.80°C	ERROR: 1.44°C	ERROR: 1.33°C	ERROR: 1.42°C	ERROR: 1.27°C	ERROR: 1.19°C
	1860	-14.3	-15.9	-6.2	-1.4	4.8	12.8	15.9	12.1	6.4	0.1	-5.6	-15.9	-0.6	13.6	11.4	11.8	-13.5075	-14.9226	-6.34388	-2.09876	3.38452	10.4597	13.2014	9.84064	4.79956	-0.77216	-5.81324	-14.9226	-1.39124	11.1672	9.22156	9.57532	10.4084	8.34458	11.2009	9.04523	7.45774	8.42722	11.0519	10.4712	12.0734	8.41161	10.2881
	1861	-15.8	-10.4	-6.3	-1.3	2.8	14.7	15.5	11.5	5.3	3.1	-9.9	-5.7	0.3	13.9	11.125	11.75	-14.8341	-10.0584	-6.43232	-2.01032	1.61572	12.1401	12.8476	9.31	3.82672	1.88104	-9.61616	-5.90168	-0.59528	11.4326	8.97835	9.5311	10.4853	8.41261	11.2911	9.12503	7.50761	8.48783	11.1341	10.5579	12.168	8.45059	10.3477
	1862	-17.4	-14.2	-11.3	-0.1	8.4	11.1	10.8	9.7	6.5	0.5	-2.3	-10.8	-0.8	10.5333	10	9.525	-16.2492	-13.4191	-10.8543	-0.94904	6.56836	8.95624	8.69092	7.71808	4.888	-0.4184	-2.89472	-10.4121	-1.56812	8.45508	7.9834	7.56331	8.70699	6.83986	9.25385	7.32334	6.38162	7.11922	9.27747	8.6009	10.0326	7.57041	9.00151
	1863	-7.9	-4.6	-6.8	-0.6	3.8	14.3	12	10.3	7.7	1.6	-4.6	-11.7	1.1	12.2	10.1	11.075	-7.84736	-4.92884	-6.87452	-1.39124	2.50012	11.7863	9.7522	8.24872	5.94928	0.55444	-4.92884	-11.2081	0.11224	9.92908	8.07184	8.93413	9.82308	7.82693	10.4624	8.39216	7.04959	7.93113	10.3789	9.76185	11.2994	8.09256	9.80014
	1864	-10.1	-14.2	-9.4	-0.8	2.9	10.2	14.3	8.7	5.8	-5.7	-12	-12	-1.9	11.0667	9.025	9.75	-9.79304	-13.4191	-9.17396	-1.56812	1.70416	8.16028	11.7863	6.83368	4.26892	-5.90168	-11.4734	-11.4734	-2.54096	8.92676	7.12111	7.7623	8.04685	6.25604	8.89553	7.00645	6.18357	6.8785	8.95091	8.2567	9.65703	7.4156	8.76473
	1865	-11.8	-17.1	-10	0.5	5.9	7.9	14.4	9.2	6.7	-4.5	-5.5	-5.9	-0.8	10.5	9.35	9.55	-11.2965	-15.9838	-9.7046	-0.4184	4.35736	6.12616	11.8748	7.27588	5.06488	-4.8404	-5.7248	-6.07856	-1.56812	8.4256	7.40854	7.58542	8.17273	6.36736	8.8428	6.95982	6.15443	6.84307	8.90286	8.20605	9.60175	7.39282	8.72988
	1866	-10.5	-14.1	-12.7	-1.6	3.4	12	12.4	12.1	8.1	1.1	-10.1	-15.7	-1.3	12.1667	9.975	11.15	-10.1468	-13.3306	-12.0925	-2.27564	2.14636	9.7522	10.106	9.84064	6.30304	0.11224	-9.79304	-14.7457	-2.01032	9.8996	7.96129	9.00046	9.83427	7.83682	10.3866	8.32515	7.00771	7.88022	10.3098	9.68907	11.22	8.05983	9.75007
	1867	-22.4	-9.3	-8.9	-4.7	0.3	8.2	13.3	12	7.1	1.2	-8	-17.3	-2.4	11.1667	8.45	10.15	-20.6712	-9.08552	-8.73176	-5.01728	-0.59528	6.39148	10.9019	9.7522	5.41864	0.20068	-7.9358	-16.1607	-2.98316	9.0152	6.61258	8.11606	8.81399	6.93449	9.25789	7.32691	6.38385	7.12193	9.28115	8.60478	10.0368	7.57215	9.00418
	1868	-10.4	-12	-5.3	-1.1	5.7	10.9	13.6	13.9	5	-0.1	-7.1	-11.8	0.1	12.8	11.025	10.85	-10.0584	-11.4734	-5.54792	-1.83344	4.18048	8.77936	11.1672	11.4326	3.5614	-0.94904	-7.13984	-11.2965	-0.77216	10.4597	8.88991	8.73514	9.64755	7.6717	10.3576	8.29951	6.99168	7.86074	10.2834	9.66121	11.1896	8.0473	9.73091
	1869	-11	-8.2	-9.1	-0.2	2.9	10.4	13	10	6.5	0.1	-7	-10.5	-0.3	11.1333	9.075	9.975	-10.589	-8.11268	-8.90864	-1.03748	1.70416	8.33716	10.6366	7.9834	4.888	-0.77216	-7.0514	-10.1468	-1.12592	8.98572	7.16533	7.96129	8.72238	6.85347	9.31507	7.37748	6.41545	7.16034	9.33326	8.65971	10.0968	7.59686	9.04196
	1870	-12.5	-13.3	-8.6	1.6	4.4	13.1	14.1	12.2	7.8	-1.7	-8.1	-15.6	-0.5	13.1333	10.95	11.8	-11.9156	-12.6231	-8.46644	0.55444	3.03076	10.725	11.6094	9.92908	6.03772	-2.36408	-8.02424	-14.6572	-1.3028	10.7545	8.82358	9.57532	10.2203	8.17822	10.9809	8.85066	7.33613	8.27941	10.8514	10.2599	11.8428	8.31655	10.1427
	1871	-17.6	-24.7	-1.3	-4.5	4.1	9.9	15	11.2	4.4	0.5	-14.1	-13.9	-2.6	12.0333	10.05	10.125	-16.426	-22.7053	-2.01032	-4.8404	2.76544	7.89496	12.4054	9.04468	3.03076	-0.4184	-13.3306	-13.1538	-3.16004	9.78168	8.02762	8.09395	8.97972	7.08106	9.68166	7.70169	6.61807	7.40662	9.66735	9.01186	10.481	7.75524	9.28421
	1872	-8.8	-6.7	-6	1	6	14.9	15.9	11	3.5	2.4	-6	-15.3	1	13.9333	11.95	11.325	-8.64332	-6.78608	-6.167	0.0238	4.4458	12.317	13.2014	8.8678	2.2348	1.26196	-6.167	-14.3919	0.0238	11.462	9.70798	9.15523	10.2706	8.22274	11.1937	9.03889	7.45377	8.4224	11.0453	10.4643	12.0659	8.40851	10.2834
	1873	-10.6	-10.9	-8.7	-1.7	4	14.1	16.6	10.9	7.2	-0.2	-5.5	-9.5	0.5	13.8667	11.4	12.2	-10.2352	-10.5006	-8.55488	-2.36408	2.677	11.6094	13.8204	8.77936	5.50708	-1.03748	-5.7248	-9.2624	-0.4184	11.4031	9.22156	9.92908	10.665	8.57156	11.5109	9.31938	7.62907	8.63547	11.3344	10.769	12.3984	8.54554	10.493
	1874	-7.3	-5.7	-7.7	-0.1	3.7	9.5	13.2	9.6	6.8	3.7	-8.1	-16.5	0.1	10.7667	9	9.775	-7.31672	-5.90168	-7.67048	-0.94904	2.41168	7.5412	10.8135	7.62964	5.15332	2.41168	-8.02424	-15.4532	-0.77216	8.66144	7.099	7.78441	8.90559	7.01551	9.32438	7.38571	6.4206	7.1666	9.34174	8.66865	10.1065	7.60088	9.04812
	1875	-22.6	-13.3	-7.3	-2.7	7.2	11.2	14.6	10.7	5.4	-2.5	-11.6	-13.5	-2	12.1667	10.925	10.475	-20.848	-12.6231	-7.31672	-3.24848	5.50708	9.04468	12.0516	8.60248	3.91516	-3.0716	-11.1196	-12.8	-2.6294	9.8996	8.80147	8.40349	9.21049	7.28516	10.0221	8.0028	6.80625	7.63535	9.97764	9.33893	10.8379	7.90235	9.50921
	1876	-13.1	-16.8	-8.6	-1.1	3.5	15.9	14.1	12.3	6.7	0	-9.5	-16.5	-1.1	14.1	11.45	12.25	-12.4462	-15.7185	-8.46644	-1.83344	2.2348	13.2014	11.6094	10.0175	5.06488	-0.8606	-9.2624	-15.4532	-1.83344	11.6094	9.26578	9.9733	10.6846	8.58887	11.5575	9.36064	7.65485	8.66681	11.3769	10.8138	12.4473	8.56569	10.5238
	1877	-13.7	-15.7	-12.3	-3.4	3.3	9.7	14.3	9.3	4.3	-1.3	-2.5	-6.9	-1.2	11.1	9.15	9.4	-12.9769	-14.7457	-11.7387	-3.86756	2.05792	7.71808	11.7863	7.36432	2.94232	-2.01032	-3.0716	-6.96296	-1.92188	8.95624	7.23166	7.45276	8.15175	6.34881	8.88716	6.99905	6.17895	6.87288	8.94329	8.24866	9.64825	7.41198	8.7592
	1878	-10.8	-6	-7	0.9	5.6	11.6	11.9	12.2	7.8	2.9	-7.6	-17.6	0.3	11.9	10.325	10.875	-10.4121	-6.167	-7.0514	-0.06464	4.09204	9.39844	9.66376	9.92908	6.03772	1.70416	-7.58204	-16.426	-0.59528	9.66376	8.27083	8.75725	9.89021	7.8863	10.3599	8.30154	6.99296	7.86229	10.2855	9.66342	11.192	8.04829	9.73243
	1879	-12.2	-15.6	-8.1	-1.9	5	9.8	15	14.1	7.8	-0.8	-8.6	-9.9	-0.4	12.9667	10.975	11.675	-11.6503	-14.6572	-8.02424	-2.54096	3.5614	7.80652	12.4054	11.6094	6.03772	-1.56812	-8.46644	-9.61616	-1.21436	10.6071	8.84569	9.46477	10.2483	8.20295	10.8587	8.74262	7.26861	8.19734	10.74	10.1425	11.7148	8.26377	10.062
	1880	-6.3	-7	-4.2	-0.3	4.8	10.3	12.5	13.3	7.9	-5.8	-9.9	-17.7	-0.2	12.0333	10.225	11	-6.43232	-7.0514	-4.57508	-1.12592	3.38452	8.24872	10.1944	10.9019	6.12616	-5.99012	-9.61616	-16.5145	-1.03748	9.78168	8.18239	8.8678	9.22657	7.29938	9.95707	7.94525	6.77029	7.59164	9.91834	9.27642	10.7697	7.87423	9.46621
	1881	-14.8	-20.9	-11.6	-4.2	3.8	10.1	12	11	6.2	-0.5	-4.3	-8.6	-1.8	11.0333	9.225	9.825	-13.9497	-19.3446	-11.1196	-4.57508	2.50012	8.07184	9.7522	8.8678	4.62268	-1.3028	-4.66352	-8.46644	-2.45252	8.89728	7.29799	7.82863	8.6028	6.74771	9.18917	7.26614	6.34587	7.07577	9.21852	8.53877	9.96481	7.54246	8.95877
	1882	-6.2	-7.6	-5.7	-1.7	6.1	11.7	13.7	13.5	8.4	1.5	-11.5	-14.4	0.7	12.9667	11.25	11.825	-6.34388	-7.58204	-5.90168	-2.36408	4.53424	9.48688	11.2557	11.0788	6.56836	0.466	-11.0312	-13.596	-0.24152	10.6071	9.0889	9.59743	10.6231	8.53445	11.1759	9.02314	7.44393	8.41043	11.0291	10.4472	12.0472	8.40082	10.2716
	1883	-13.5	-10.2	-7.5	2.2	6.6	13.8	14.7	11.3	5.9	1.3	-1.5	-7.7	1.3	13.2667	11.6	11.425	-12.8	-9.88148	-7.4936	1.08508	4.97644	11.3441	12.1401	9.13312	4.35736	0.28912	-2.1872	-7.67048	0.28912	10.8724	9.39844	9.24367	10.2937	8.24315	11.0738	8.93285	7.3875	8.34184	10.936	10.3491	11.9402	8.3567	10.2041
	1884	-9.7	-9.9	-4.4	-1.7	2.8	9.5	14.1	12.5	8	1.9	-6.7	-12.8	0.3	12.0333	9.725	11.025	-9.43928	-9.61616	-4.75196	-2.36408	1.61572	7.5412	11.6094	10.1944	6.2146	0.81976	-6.78608	-12.1809	-0.59528	9.78168	7.74019	8.88991	9.77343	7.78302	10.2385	8.19413	6.92583	7.7807	10.1748	9.54675	11.0647	7.99582	9.65217
	1885	-14.9	-7.3	-7.1	-1.6	2.8	8.4	13	10.1	4.5	-3.3	-7.1	-11.2	-1.1	10.5	8.575	9	-14.0382	-7.31672	-7.13984	-2.27564	1.61572	6.56836	10.6366	8.07184	3.1192	-3.77912	-7.13984	-10.7659	-1.83344	8.4256	6.72313	7.099	7.61329	5.87259	8.3167	6.49454	5.86365	6.48964	8.4234	7.70067	9.05031	7.16552	8.38223
	1886	-15.9	-11.1	-5.9	0.4	4.5	11.9	12.3	11.7	6.3	2.2	-1.4	-14	0.1	11.9667	10.1	10.55	-14.9226	-10.6774	-6.07856	-0.50684	3.1192	9.66376	10.0175	9.48688	4.71112	1.08508	-2.09876	-13.2422	-0.77216	9.72272	8.07184	8.46982	9.48881	7.5313	10.0682	8.04353	6.83171	7.6663	10.0196	9.38317	10.8862	7.92225	9.53964
	1887	-7.6	-4.7	-5.6	-1.4	5.6	9.4	12.4	10.2	7.3	-1.5	-8.2	-14.2	0.1	10.6667	9.4	9.825	-7.58204	-5.01728	-5.81324	-2.09876	4.09204	7.45276	10.106	8.16028	5.59552	-2.1872	-8.11268	-13.4191	-0.77216	8.573	7.45276	7.82863	8.62937	6.77122	9.18336	7.261	6.34266	7.07186	9.21323	8.53319	9.95872	7.53995	8.95493
	1888	-10.4	-16.8	-15.5	-5	3.7	10.9	11.9	10.2	5.3	-3.1	-14	-5.2	-2.3	11	9.175	9.575	-10.0584	-15.7185	-14.5688	-5.2826	2.41168	8.77936	9.66376	8.16028	3.82672	-3.60224	-13.2422	-5.45948	-2.89472	8.8678	7.25377	7.60753	8.16224	6.35808	8.9076	7.01712	6.19024	6.88661	8.96191	8.26829	9.66968	7.42081	8.7727
	1889	-8.9	-14.2	-11.3	-1.4	8.2	14.4	11.7	9.9	5.6	1.2	-1.1	-8.4	0.5	12	11.05	10.4	-8.73176	-13.4191	-10.8543	-2.09876	6.39148	11.8748	9.48688	7.89496	4.09204	0.20068	-1.83344	-8.28956	-0.4184	9.7522	8.91202	8.33716	9.4951	7.53687	10.2293	8.18604	6.92077	7.77455	10.1665	9.53796	11.0551	7.99187	9.64613
	1890	-7.9	-7.4	-4.3	-0.7	7.5	11.5	11.4	10.6	6.8	-1.9	-6.5	-12.3	0.6	11.1667	10.25	10.075	-7.84736	-7.40516	-4.66352	-1.47968	5.7724	9.31	9.22156	8.51404	5.15332	-2.54096	-6.6092	-11.7387	-0.32996	9.0152	8.2045	8.04973	8.92098	7.02911	9.57664	7.60881	6.56002	7.33607	9.57164	8.91098	10.371	7.70987	9.21481
	1891	-12.2	-3	-8.3	-1.6	4.8	9.1	14.9	9.2	5.7	2.5	-4.3	-8.5	0.7	11.0667	9.5	9.725	-11.6503	-3.5138	-8.20112	-2.27564	3.38452	7.18744	12.317	7.27588	4.18048	1.3504	-4.66352	-8.378	-0.24152	8.92676	7.5412	7.74019	8.84126	6.95861	9.37629	7.43162	6.44929	7.20147	9.38905	8.71852	10.1609	7.62331	9.08242
	1892	-19.8	-17.1	-6.2	-2.7	2.3	9	12.5	9.7	5.9	-0.2	-2.9	-13.4	-1.9	10.4	8.375	9.275	-18.3717	-15.9838	-6.34388	-3.24848	1.17352	7.099	10.1944	7.71808	4.35736	-1.03748	-3.42536	-12.7116	-2.54096	8.33716	6.54625	7.34221	8.06643	6.27335	8.61613	6.75935	6.02915	6.6908	8.69628	7.98831	9.36416	7.29488	8.5801
	1893	-19.5	-21.6	-9.7	-0.3	4.4	10.3	14.1	10.2	3.1	0.2	-6.7	-7.8	-1.9	11.5333	9.75	9.425	-18.1064	-19.9636	-9.43928	-1.12592	3.03076	8.24872	11.6094	8.16028	1.88104	-0.68372	-6.78608	-7.75892	-2.54096	9.33948	7.7623	7.47487	8.37273	6.54424	9.12847	7.21246	6.31232	7.03499	9.1632	8.48046	9.90119	7.51624	8.91866
	1894	-13.3	-11.3	-3.1	2.7	6.4	15.3	15.1	11.4	4.3	-2.1	-2.8	-6.7	1.3	13.9333	12.05	11.525	-12.6231	-10.8543	-3.60224	1.52728	4.79956	12.6707	12.4938	9.22156	2.94232	-2.71784	-3.33692	-6.78608	0.28912	11.462	9.79642	9.33211	10.0832	8.057	11.1269	8.9798	7.41684	8.37751	10.9844	10.4001	11.9959	8.37964	10.2392
	1895	-18.2	-14.8	-11	-0.4	9	13.3	12.7	10.7	6.1	-0.1	-3.8	-11.4	-0.7	12.2333	11.425	10.7	-16.9567	-13.9497	-10.589	-1.21436	7.099	10.9019	10.3713	8.60248	4.53424	-0.94904	-4.22132	-10.9428	-1.47968	9.95856	9.24367	8.60248	9.7007	7.7187	10.4405	8.37281	7.0375	7.91643	10.3589	9.74083	11.2765	8.08311	9.78568
	1896	-7.7	-6.9	-5	-0.6	4.4	11.6	16	10.4	6.8	-1.3	-6.1	-12.2	0.8	12.6667	10.6	11.2	-7.67048	-6.96296	-5.2826	-1.39124	3.03076	9.39844	13.2898	8.33716	5.15332	-2.01032	-6.25544	-11.6503	-0.15308	10.3418	8.51404	9.04468	9.75105	7.76323	10.5206	8.44364	7.08176	7.97023	10.4319	9.81777	11.3604	8.11771	9.83861
	1897	-13.3	-13.4	-11.6	1.4	7.9	11.3	14.2	11.2	7	2.5	-4	-8.6	0.4	12.2333	11.15	10.925	-12.6231	-12.7116	-11.1196	0.37756	6.12616	9.13312	11.6979	9.04468	5.3302	1.3504	-4.3982	-8.46644	-0.50684	9.95856	9.00046	8.80147	10.0524	8.02978	10.6183	8.52999	7.13573	8.03583	10.5209	9.91156	11.4628	8.1599	9.90313
	1898	-6.5	-11.9	-9.9	-1.3	5.3	12.1	12.2	10.9	6.5	-0.1	-5.8	-13.8	-0.2	11.7333	10.125	10.425	-6.6092	-11.385	-9.61616	-2.01032	3.82672	9.84064	9.92908	8.77936	4.888	-0.94904	-5.99012	-13.0653	-1.03748	9.51636	8.09395	8.35927	9.23497	7.3068	9.89068	7.88654	6.73359	7.54704	9.85784	9.21264	10.7001	7.84555	9.42233
	1899	-15.5	-12.1	-13	-3	1.9	10.5	15.7	8.9	5.7	-0.7	-3.5	-14.2	-1.6	11.7	9.25	10.2	-14.5688	-11.5618	-12.3578	-3.5138	0.81976	8.4256	13.0245	7.01056	4.18048	-1.47968	-3.956	-13.4191	-2.27564	9.48688	7.3201	8.16028	8.79231	6.91532	9.52434	7.56255	6.53112	7.30093	9.52397	8.86074	10.3161	7.68727	9.18025
	1900	-15.3	-19.9	-8.3	-2.2	4.2	12	10.5	10.9	5	1.1	-4.1	-13.3	-1.6	11.1333	9.4	9.6	-14.3919	-18.4602	-8.20112	-2.80628	2.85388	9.7522	8.4256	8.77936	3.5614	0.11224	-4.48664	-12.6231	-2.27564	8.98572	7.45276	7.62964	8.56224	6.71184	9.18476	7.26224	6.34343	7.0728	9.2145	8.53454	9.96019	7.54056	8.95585
	1901	-9.3	-17.4	-8.2	0.6	6.2	13	17.7	12.8	7.7	4.8	-6.1	-15.1	0.6	14.5	12.425	12.8	-9.08552	-16.2492	-8.11268	-0.32996	4.62268	10.6366	14.7933	10.4597	5.94928	3.38452	-6.25544	-14.215	-0.32996	11.9632	10.1281	10.4597	11.7476	9.52894	12.3844	10.092	8.1119	9.22234	12.1305	11.6082	13.314	8.92297	11.0702
	1902	-12.9	-13.5	-11.2	-2.1	3.3	9.1	10.6	9.9	5.3	-1	-4.6	-10.7	-1.5	9.86667	8.225	8.725	-12.2694	-12.8	-10.7659	-2.71784	2.05792	7.18744	8.51404	7.89496	3.82672	-1.745	-4.92884	-10.3237	-2.1872	7.86548	6.41359	6.85579	7.58881	5.85094	8.142	6.34004	5.76709	6.37228	8.26419	7.53286	8.86719	7.09004	8.26679
	1903	-13.2	-5.4	-2.8	-1.8	4.8	9.6	11.7	10.5	6.8	-2.8	-5.4	-6.5	0.5	10.6	9.15	9.65	-12.5347	-5.63636	-3.33692	-2.45252	3.38452	7.62964	9.48688	8.4256	5.15332	-3.33692	-5.63636	-6.6092	-0.4184	8.51404	7.23166	7.67386	8.32028	6.49786	8.93004	7.03697	6.20265	6.90168	8.98236	8.28985	9.6932	7.43051	8.78753
	1904	-6.9	-16.6	-9	0.7	4.3	9.8	12	10.2	6.8	1.3	-8.9	-16.5	-1.1	10.6667	9.075	9.7	-6.96296	-15.5416	-8.8202	-0.24152	2.94232	7.80652	9.7522	8.16028	5.15332	0.28912	-8.73176	-15.4532	-1.83344	8.573	7.16533	7.71808	8.67483	6.81142	9.15827	7.23881	6.32879	7.05501	9.19036	8.50909	9.93242	7.52911	8.93835
	1905	-16.1	-9.4	-5.9	-2.8	5.4	12.7	13.2	10.5	6	-3.9	-5.2	-7.3	-0.2	12.1333	10.45	10.6	-15.0994	-9.17396	-6.07856	-3.33692	3.91516	10.3713	10.8135	8.4256	4.4458	-4.30976	-5.45948	-7.31672	-1.03748	9.87012	8.38138	8.51404	9.07343	7.16394	9.93683	7.92735	6.7591	7.57804	9.89989	9.25698	10.7485	7.86549	9.45283
	1906	-10.5	-9.4	-9.1	1.6	5.7	11.7	14.2	10.1	6.6	1.4	-3.3	-10.5	0.7	12	10.425	10.65	-10.1468	-9.17396	-8.90864	0.55444	4.18048	9.48688	11.6979	8.07184	4.97644	0.37756	-3.77912	-10.1468	-0.24152	9.7522	8.35927	8.55826	9.58322	7.6148	10.2193	8.17716	6.91522	7.7678	10.1573	9.52832	11.0446	7.98753	9.63949
	1907	-11.7	-8.2	-3.4	0.3	3.2	11.6	12.1	9.2	5.8	3.4	-2.6	-11.4	0.7	10.9667	9.025	9.675	-11.2081	-8.11268	-3.86756	-0.59528	1.96948	9.39844	9.84064	7.27588	4.26892	2.14636	-3.16004	-10.9428	-0.24152	8.83832	7.12111	7.69597	8.75455	6.88192	9.28732	7.35294	6.40012	7.1417	9.30797	8.63305	10.0677	7.58487	9.02363
	1908	-9.2	-9.4	-8.3	-0.4	3.8	9.3	14.2	12.3	6.2	3.5	-8.9	-7.1	0.5	11.9333	9.9	10.5	-8.99708	-9.17396	-8.20112	-1.21436	2.50012	7.36432	11.6979	10.0175	4.62268	2.2348	-8.73176	-7.13984	-0.4184	9.69324	7.89496	8.4256	9.52937	7.56718	10.0056	7.98822	6.79714	7.62428	9.96261	9.32308	10.8206	7.89522	9.49831
	1909	-6.2	-11.9	-10.4	-3	2.9	12	13	10.7	6.8	3.1	-10.7	-10	-0.3	11.9	9.65	10.625	-6.34388	-11.385	-10.0584	-3.5138	1.70416	9.7522	10.6366	8.60248	5.15332	1.88104	-10.3237	-9.7046	-1.12592	9.66376	7.67386	8.53615	9.52448	7.56285	10.074	8.04865	6.83491	7.67019	10.0249	9.38873	10.8923	7.92475	9.54347
	1910	-11.2	-5.1	-3.6	-0.3	6.2	11.1	13.5	11.8	6.9	0.6	-7.1	-11.6	0.9	12.1333	10.65	10.825	-10.7659	-5.37104	-4.04444	-1.12592	4.62268	8.95624	11.0788	9.57532	5.24176	-0.32996	-7.13984	-11.1196	-0.06464	9.87012	8.55826	8.71303	9.7014	7.71932	10.3103	8.2576	6.96549	7.82891	10.2402	9.61568	11.1399	8.02682	9.69959
	1911	-10.6	-11.5	-6.9	-0.9	7.5	10.4	12.7	13.5	7.5	-0.6	-7.6	-5.3	0.7	12.2	11.025	11.025	-10.2352	-11.0312	-6.96296	-1.65656	5.7724	8.33716	10.3713	11.0788	5.7724	-1.39124	-7.58204	-5.54792	-0.24152	9.92908	8.88991	8.88991	9.85664	7.85662	10.4325	8.36576	7.03309	7.91107	10.3517	9.73317	11.2681	8.07966	9.78041
	1912	-17.2	-14	-4.1	-1.5	5.5	12.7	15.4	12.5	6.1	-0.8	-6.3	-8.9	0	13.5333	11.525	11.675	-16.0723	-13.2422	-4.48664	-2.1872	4.0036	10.3713	12.7592	10.1944	4.53424	-1.56812	-6.43232	-8.73176	-0.8606	11.1083	9.33211	9.46477	10.2713	8.22336	11.0897	8.94696	7.39632	8.35257	10.9506	10.3645	11.957	8.3636	10.2147
	1913	-16.1	-9.5	-5.4	0.6	5.8	12	14.3	11.4	7	0.5	-2.2	-14.3	0.3	12.5667	10.875	11.175	-15.0994	-9.2624	-5.63636	-0.32996	4.26892	9.7522	11.7863	9.22156	5.3302	-0.4184	-2.80628	-13.5075	-0.59528	10.2534	8.75725	9.02257	9.96434	7.95186	10.635	8.54476	7.14496	8.04704	10.5361	9.9276	11.4803	8.16711	9.91416
	1914	-10.6	-8	-7.9	1.2	4.4	12.2	16.5	11.5	7.1	0.1	-5.8	-9.1	1	13.4	11.15	11.825	-10.2352	-7.9358	-7.84736	0.20068	3.03076	9.92908	13.732	9.31	5.41864	-0.77216	-5.99012	-8.90864	0.0238	10.9904	9.00046	9.59743	10.4042	8.34087	11.1565	9.00602	7.43323	8.39743	11.0115	10.4286	12.027	8.39245	10.2588
	1915	-16.1	-10.8	-11.3	-0.8	3	8.8	14.1	10.7	5	-0.8	-9.6	-22.9	-2.6	11.2	9.15	9.65	-15.0994	-10.4121	-10.8543	-1.56812	1.7926	6.92212	11.6094	8.60248	3.5614	-1.56812	-9.35084	-21.1134	-3.16004	9.04468	7.23166	7.67386	8.39301	6.56218	9.03938	7.13367	6.26308	6.97514	9.08201	8.39488	9.80781	7.47775	8.85978
	1916	-11.6	-11	-9	-0.4	3.8	10.6	16.4	10.1	5.2	-3	-2.8	-10.2	-0.2	12.3667	10.225	10.575	-11.1196	-10.589	-8.8202	-1.21436	2.50012	8.51404	13.6436	8.07184	3.73828	-3.5138	-3.33692	-9.88148	-1.03748	10.0765	8.18239	8.49193	9.04685	7.14044	9.90692	7.9009	6.74257	7.55795	9.87264	9.22824	10.7171	7.85257	9.43307
	1917	-18.5	-14.6	-11.6	-3.6	3.1	13.2	12.5	15.4	6	1.2	-6.1	-12.1	-1.3	13.7	11.05	11.775	-17.222	-13.7728	-11.1196	-4.04444	1.88104	10.8135	10.1944	12.7592	4.4458	0.20068	-6.25544	-11.5618	-2.01032	11.2557	8.91202	9.55321	10.372	8.31242	11.072	8.93123	7.38649	8.34061	10.9344	10.3474	11.9383	8.35591	10.2029
	1918	-17.9	-9.4	-4.6	0.7	5.9	10.1	15.3	10.3	5.3	2.1	-0.3	-9.8	0.6	11.9	10.4	10.25	-16.6914	-9.17396	-4.92884	-0.24152	4.35736	8.07184	12.6707	8.24872	3.82672	0.99664	-1.12592	-9.52772	-0.32996	9.66376	8.33716	8.2045	9.32797	7.38906	9.95246	7.94118	6.76774	7.58854	9.91414	9.27199	10.7649	7.87224	9.46316
	1919	-10	-13.6	-8.7	-1.9	8.4	11.3	15.9	9.9	6.8	0.1	-10	-14.8	-0.6	12.3667	11.375	10.975	-9.7046	-12.8884	-8.55488	-2.54096	6.56836	9.13312	13.2014	7.89496	5.15332	-0.77216	-9.7046	-13.9497	-1.39124	10.0765	9.19945	8.84569	9.92727	7.91908	10.6302	8.54058	7.14235	8.04387	10.5318	9.92306	11.4753	8.16507	9.91104
	1920	-10.6	-7.2	-0.5	1	7.6	10.8	13.7	10.9	8	1.5	-2.7	-12.2	1.7	11.8	10.75	10.85	-10.2352	-7.22828	-1.3028	0.0238	5.86084	8.69092	11.2557	8.77936	6.2146	0.466	-3.24848	-11.6503	0.64288	9.57532	8.6467	8.73514	9.88112	7.87826	10.4034	8.33996	7.01697	7.89147	10.3251	9.70515	11.2375	8.06706	9.76113
	1921	-13.4	-10.5	-3.1	3.1	8	8.9	12	11	6.1	0.2	-8.8	-10.1	0.3	10.6333	9.975	9.5	-12.7116	-10.1468	-3.60224	1.88104	6.2146	7.01056	9.7522	8.8678	4.53424	-0.68372	-8.64332	-9.79304	-0.59528	8.54352	7.96129	7.5412	8.65315	6.79224	9.16489	7.24466	6.33245	7.05945	9.19639	8.51545	9.93936	7.53197	8.94272
	1922	-15.2	-13	-8	-1.9	5.6	11	14.1	10.8	6.7	-0.2	-6.1	-12.6	-0.7	11.9667	10.375	10.65	-14.3035	-12.3578	-7.9358	-2.54096	4.09204	8.8678	11.6094	8.69092	5.06488	-1.03748	-6.25544	-12.004	-1.47968	9.72272	8.31505	8.55826	9.44685	7.4942	10.102	8.07341	6.85038	7.68899	10.0504	9.41562	10.9216	7.93684	9.56196
	1923	-7.6	-16	-3.6	-2.4	3.9	7	12.9	10.2	6.5	0.1	-6.3	-12.6	-0.7	10.0333	8.5	9.15	-7.58204	-15.011	-4.04444	-2.98316	2.58856	5.3302	10.5482	8.16028	4.888	-0.77216	-6.43232	-12.004	-1.47968	8.01288	6.6568	7.23166	8.09371	6.29747	8.53063	6.68374	5.98189	6.63336	8.61836	7.90618	9.27454	7.25794	8.5236
	1924	-12	-13.7	-11	-2	4.1	9.1	14.9	12.8	8.2	3.7	-3	-5.6	0.5	12.2667	10.225	11.25	-11.4734	-12.9769	-10.589	-2.6294	2.76544	7.18744	12.317	10.4597	6.39148	2.41168	-3.5138	-5.81324	-0.4184	9.98804	8.18239	9.0889	10.2028	8.16275	10.6022	8.51577	7.12684	8.02502	10.5063	9.89611	11.4459	8.15295	9.8925
	1925	-4.4	-7.8	-9.6	0.5	6.4	11.2	17.1	11.9	7.1	-1.9	-8.9	-12.8	0.7	13.4	11.65	11.825	-4.75196	-7.75892	-9.35084	-0.4184	4.79956	9.04468	14.2626	9.66376	5.41864	-2.54096	-8.73176	-12.1809	-0.24152	10.9904	9.44266	9.59743	10.3692	8.30995	11.1642	9.01283	7.43748	8.4026	11.0185	10.436	12.035	8.39578	10.2639	SGI	Tw	Twr	Delta T
	1926	-15.2	-16.1	-5.3	-0.6	4.1	12	14.6	12.9	6.2	-3.5	-4.3	-11	-0.5	13.1667	10.9	11.425	-14.3035	-15.0994	-5.54792	-1.39124	2.76544	9.7522	12.0516	10.5482	4.62268	-3.956	-4.66352	-10.589	-1.3028	10.784	8.77936	9.24367	9.74406	7.75704	10.5993	8.51327	7.12528	8.02312	10.5037	9.8934	11.4429	8.15173	9.89063	-0.351537	8.51327	7.91285	0.600421
	1927	-11.7	-8.3	-4.9	-1.8	3.5	10.2	16.5	12.6	6	-1.1	-12.1	-11.9	-0.3	13.1	10.7	11.325	-11.2081	-8.20112	-5.19416	-2.45252	2.2348	8.16028	13.732	10.2828	4.4458	-1.83344	-11.5618	-11.385	-1.12592	10.725	8.60248	9.15523	9.83497	7.83744	10.5868	8.50213	7.11831	8.01466	10.4922	9.88129	11.4297	8.14628	9.88231	-0.172895	8.50213	8.17143	0.330694
	1928	-13.6	-10.7	-6.2	-0.9	4.6	9	10.5	10.9	6.4	0	-6.5	-10.3	-0.6	10.1333	8.75	9.2	-12.8884	-10.3237	-6.34388	-1.65656	3.20764	7.099	8.4256	8.77936	4.79956	-0.8606	-6.6092	-9.96992	-1.39124	8.10132	6.8779	7.27588	8.15944	6.35561	8.62764	6.76953	6.03551	6.69853	8.70677	7.99936	9.37623	7.29986	8.5877	-0.580498	6.76953	7.58143	0.811897
	1929	-12.6	-16.5	-2.8	-3.6	6.2	10	11.6	9.8	6.9	1.4	-2.1	-1.6	0.6	10.4667	9.4	9.575	-12.004	-15.4532	-3.33692	-4.04444	4.62268	7.9834	9.39844	7.80652	5.24176	0.37756	-2.71784	-2.27564	-0.32996	8.39612	7.45276	7.60753	8.69231	6.82688	9.16478	7.24457	6.33239	7.05938	9.19629	8.51534	9.93925	7.53193	8.94265	-0.506518	7.24457	7.68851	0.443947
	1930	-5.5	-8.3	-5	0.8	7.8	12.6	16.5	14.2	5.4	1.4	-6.1	-5.9	2.3	14.4333	12.775	12.175	-5.7248	-8.20112	-5.2826	-0.15308	6.03772	10.2828	13.732	11.6979	3.91516	0.37756	-6.25544	-6.07856	1.17352	11.9042	10.4376	9.90697	11.0399	8.90305	11.8409	9.61129	7.8115	8.85721	11.6352	11.0861	12.7443	8.68815	10.7111	0.0711008	9.61129	8.52462	1.08667
	1931	-12.4	-13.3	-8.9	-0.6	6.8	7.3	15	11.1	4.6	0.1	-0.5	-6.8	0.2	11.1333	10.05	9.5	-11.8272	-12.6231	-8.73176	-1.39124	5.15332	5.59552	12.4054	8.95624	3.20764	-0.77216	-1.3028	-6.87452	-0.68372	8.98572	8.02762	7.5412	8.59091	6.7372	9.18099	7.2589	6.34135	7.07027	9.21107	8.53091	9.95624	7.53893	8.95336	-0.324389	7.2589	7.95215	0.693243
	1932	-5.8	-5.4	-5.9	-0.2	5.9	10.3	14.6	11.4	5.7	-1.5	-2.8	-3.4	1.9	12.1	10.55	10.5	-5.99012	-5.63636	-6.07856	-1.03748	4.35736	8.24872	12.0516	9.22156	4.18048	-2.1872	-3.33692	-3.86756	0.81976	9.84064	8.46982	8.4256	9.23846	7.3099	9.96404	7.95142	6.77414	7.59632	9.92469	9.28311	10.777	7.87724	9.47081	-0.126074	7.95142	8.23921	0.287792
	1933	-7	-12	-6.9	-0.8	6.2	15.1	15.4	11.8	7.6	1.3	-8.1	-7.8	1.2	14.1	12.125	12.475	-7.0514	-11.4734	-6.96296	-1.56812	4.62268	12.4938	12.7592	9.57532	5.86084	0.28912	-8.02424	-7.75892	0.20068	11.6094	9.86275	10.1723	11.158	9.00757	11.9482	9.70616	7.87079	8.92927	11.7329	11.1891	12.8568	8.73449	10.782	0.576692	9.70616	9.25646	0.449696
	1934	-4.1	-6.6	-5.9	-1.5	7.5	11.6	15.9	13.5	10	2	-4.9	-3.9	2.8	13.6667	12.125	12.75	-4.48664	-6.69764	-6.07856	-2.1872	5.7724	9.39844	13.2014	11.0788	7.9834	0.9082	-5.19416	-4.30976	1.61572	11.2262	9.86275	10.4155	11.5448	9.34958	12.0725	9.81607	7.93948	9.01276	11.8462	11.3085	12.987	8.78819	10.8641	0.773796	9.81607	9.54177	0.274298
	1935	-10.5	-8.6	-8.6	-0.2	2.9	11.3	13.5	10.5	5.7	1.1	-1.3	-6	0.8	11.7667	9.55	10.25	-10.1468	-8.46644	-8.46644	-1.03748	1.70416	9.13312	11.0788	8.4256	4.18048	0.11224	-2.01032	-6.167	-0.15308	9.54584	7.58542	8.2045	9.04406	7.13796	9.69064	7.70963	6.62303	7.41265	9.67553	9.02049	10.4904	7.75912	9.29015	0.272821	7.70963	8.81661	1.10698
	1936	-12.7	-13.3	-7.8	-1.4	7.4	14.1	14.8	11.9	6.9	-0.2	-2.8	-2.7	1.2	13.6	12.05	11.925	-12.0925	-12.6231	-7.75892	-2.09876	5.68396	11.6094	12.2285	9.66376	5.24176	-1.03748	-3.33692	-3.24848	0.20068	11.1672	9.79642	9.68587	10.6427	8.55177	11.4519	9.26726	7.59649	8.59587	11.2807	10.7124	12.3366	8.52007	10.454	0.711313	9.26726	9.45133	0.184068
	1937	-8.1	-14.1	-8.2	2.8	9.2	12.8	17	15	6.6	3.6	-3.4	-9.3	2	14.9333	13.5	12.85	-8.02424	-13.3306	-8.11268	1.61572	7.27588	10.4597	14.1742	12.4054	4.97644	2.32324	-3.86756	-9.08552	0.9082	12.3464	11.0788	10.5039	11.8881	9.65325	12.5883	10.2722	8.22457	9.35928	12.3163	11.804	13.5277	9.01104	11.2049	1.38393	10.2722	10.4249	0.152699
	1938	-8.9	-3.6	-2.5	-0.1	5.3	10.7	15.7	13.3	7.8	3	-1.8	-5.1	2.8	13.2333	11.25	11.875	-8.73176	-4.04444	-3.0716	-0.94904	3.82672	8.60248	13.0245	10.9019	6.03772	1.7926	-2.45252	-5.37104	1.61572	10.843	9.0889	9.64165	10.7531	8.64948	11.2894	9.12357	7.50669	8.48672	11.1326	10.5563	12.1663	8.44988	10.3467	0.293305	9.12357	8.84626	0.277314
	1939	-9.2	-3.9	-6.5	-1.1	4.4	10.4	14	14.1	7	0.5	-2.7	-12.9	1.2	12.8333	10.725	11.375	-8.99708	-4.30976	-6.6092	-1.83344	3.03076	8.33716	11.521	11.6094	5.3302	-0.4184	-3.24848	-12.2694	0.20068	10.4892	8.62459	9.19945	10.0608	8.03721	10.6573	8.56456	7.15733	8.06208	10.5565	9.9491	11.5037	8.17678	9.92895	0.186594	8.56456	8.69179	0.127238
	1940	-16.4	-16.2	-12.3	-1.6	8.5	12.7	13.7	10.8	6	2.6	-6.1	-12.4	-0.9	12.4	11.425	10.8	-15.3648	-15.1879	-11.7387	-2.27564	6.6568	10.3713	11.2557	8.69092	4.4458	1.43884	-6.25544	-11.8272	-1.65656	10.106	9.24367	8.69092	9.98741	7.97227	10.6387	8.54805	7.14702	8.04954	10.5395	9.93118	11.4842	8.16872	9.91662	-0.145568	8.54805	8.21099	0.337063
	1941	-18.4	-13.1	-8	-2.2	5.5	10.3	16.5	10.6	6.3	-1.6	-6.4	-15.9	-1.4	12.4667	10.725	10.925	-17.1336	-12.4462	-7.9358	-2.80628	4.0036	8.24872	13.732	8.51404	4.71112	-2.27564	-6.52076	-14.9226	-2.09876	10.1649	8.62459	8.80147	9.56923	7.60243	10.3258	8.27133	6.97408	7.83934	10.2544	9.6306	11.1562	8.03353	9.70985	0.173392	8.27133	8.67269	0.401354
	1942	-20.7	-17.4	-11.5	1.2	4.4	9.6	13.1	12	6.4	0.9	-3.8	-10.4	-1.4	11.5667	9.775	10.275	-19.1677	-16.2492	-11.0312	0.20068	3.03076	7.62964	10.725	9.7522	4.79956	-0.06464	-4.22132	-10.0584	-2.09876	9.36896	7.78441	8.22661	9.15035	7.23197	9.69074	7.70972	6.62309	7.41272	9.67562	9.02058	10.4905	7.75917	9.29021	0.257903	7.70972	8.79501	1.0853
	1943	-14.3	-6.7	-2.2	0.4	6.1	12.6	13.9	11.1	6.9	2.9	-3.7	-3.6	2	12.5333	10.925	11.125	-13.5075	-6.78608	-2.80628	-0.50684	4.53424	10.2828	11.4326	8.95624	5.24176	1.70416	-4.13288	-4.04444	0.9082	10.2239	8.80147	8.97835	10.1378	8.10524	10.7437	8.64089	7.20503	8.12006	10.6352	10.032	11.5942	8.21407	9.98599	0.148535	8.64089	8.6367	0.00418251
	1944	-10.2	-8.7	-5.9	-1.9	3.7	9.1	14	12.1	7.1	3.4	-3.7	-3.6	1.3	11.7333	9.725	10.575	-9.88148	-8.55488	-6.07856	-2.54096	2.41168	7.18744	11.521	9.84064	5.41864	2.14636	-4.13288	-4.04444	0.28912	9.51636	7.74019	8.49193	9.57483	7.60738	10.0025	7.98545	6.79541	7.62217	9.95976	9.32008	10.8174	7.89387	9.49624	0.249446	7.98545	8.78277	0.797326
	1945	-14.3	-9	-4.7	1.9	5.5	11.2	15.6	13.8	6	-1.7	-3.8	-11.9	0.7	13.5333	11.525	11.65	-13.5075	-8.8202	-5.01728	0.81976	4.0036	9.04468	12.936	11.3441	4.4458	-2.36408	-4.22132	-11.385	-0.24152	11.1083	9.33211	9.44266	10.1853	8.14729	10.9804	8.85027	7.33589	8.27912	10.851	10.2594	11.8424	8.31636	10.1424	0.306187	8.85027	8.86491	0.0146326
	1946	-9.1	-14.1	-7.9	0.8	6.3	10.6	15	12.5	8.3	1.2	-4	-4.9	1.2	12.7	11.1	11.6	-8.90864	-13.3306	-7.84736	-0.15308	4.71112	8.51404	12.4054	10.1944	6.47992	0.20068	-4.3982	-5.19416	0.20068	10.3713	8.95624	9.39844	10.4238	8.35819	10.9761	8.84642	7.33348	8.27619	10.847	10.2553	11.8378	8.31448	10.1396	0.440953	8.84642	9.05998	0.213563
	1947	-7.6	-19.4	-12.6	-0.8	7.6	13.7	15.6	13.2	8.5	0.2	-6.3	-11.4	0.1	14.1667	12.525	12.75	-7.58204	-18.018	-12.004	-1.56812	5.86084	11.2557	12.936	10.8135	6.6568	-0.68372	-6.43232	-10.9428	-0.77216	11.6684	10.2165	10.4155	11.3958	9.21785	12.1333	9.86989	7.97311	9.05365	11.9017	11.3669	13.0508	8.81448	10.9043	0.85995	9.86989	9.66648	0.203413
	1948	-17.7	-8.4	-0.9	2.3	6.7	10.3	14.3	10.5	7	-0.4	-2.9	-4.1	1.4	11.7	10.45	10.525	-16.5145	-8.28956	-1.65656	1.17352	5.06488	8.24872	11.7863	8.4256	5.3302	-1.21436	-3.42536	-4.48664	0.37756	9.48688	8.38138	8.44771	9.39371	7.44719	10.0169	7.99813	6.80333	7.63181	9.97283	9.33385	10.8324	7.90007	9.50572	0.0243641	7.99813	8.45697	0.458838
	1949	-7.3	-5.1	-6.8	-0.1	6.4	11.1	12.4	10.8	9.7	1.5	-1.1	-7.2	2	11.4333	10.175	11	-7.31672	-5.37104	-6.87452	-0.94904	4.79956	8.95624	10.106	8.69092	7.71808	0.466	-1.83344	-7.22828	0.9082	9.25104	8.13817	8.8678	9.92168	7.91413	10.3506	8.29333	6.98782	7.85605	10.277	9.65449	11.1823	8.04428	9.72629	-0.462531	8.29333	7.75219	0.541139
	1950	-16.5	-10.9	-4.7	1.3	5.5	11.4	13.3	13.7	7.6	1.9	-5.2	-11.3	0.5	12.8	10.975	11.5	-15.4532	-10.5006	-5.01728	0.28912	4.0036	9.22156	10.9019	11.2557	5.86084	0.81976	-5.45948	-10.8543	-0.4184	10.4597	8.84569	9.31	10.3448	8.2883	10.892	8.77208	7.28702	8.21972	10.7704	10.1745	11.7497	8.27816	10.084	-0.129564	8.77208	8.23416	0.537919
	1951	-17.3	-10.8	-10.5	-0.4	3.5	9	11.1	13.9	8.4	3.1	-6.9	-7.2	-0.3	11.3333	9.375	10.6	-16.1607	-10.4121	-10.1468	-1.21436	2.2348	7.099	8.95624	11.4326	6.56836	1.88104	-6.96296	-7.22828	-1.12592	9.1626	7.43065	8.51404	9.55035	7.58573	9.85267	7.85292	6.71259	7.5215	9.8232	9.17613	10.6603	7.82913	9.39722	-0.366412	7.85292	7.89132	0.0383961
	1952	-12.3	-10.9	-8.5	1.5	5.8	10.1	12.8	9.7	5	-1.2	-7.2	-12.9	-0.7	10.8667	9.6	9.4	-11.7387	-10.5006	-8.378	0.466	4.26892	8.07184	10.4597	7.71808	3.5614	-1.92188	-7.22828	-12.2694	-1.47968	8.74988	7.62964	7.45276	8.30979	6.48858	8.98931	7.08939	6.2354	6.9415	9.03638	8.34679	9.75532	7.45611	8.8267	-0.306312	7.08939	7.97831	0.888928
	1953	-12.7	-14.7	-1.3	1.4	5.8	15.8	13.6	12.7	6.5	3.5	-1.2	-3.8	2.1	14.0333	11.975	12.15	-12.0925	-13.8613	-2.01032	0.37756	4.26892	13.1129	11.1672	10.3713	4.888	2.2348	-1.92188	-4.22132	0.99664	11.5505	9.73009	9.88486	11.0385	8.90182	11.7795	9.55697	7.77755	8.81594	11.5792	11.0271	12.6799	8.66161	10.6705	-0.032148	9.55697	8.37517	1.18181
	1954	-10.6	-12.9	-5.1	-0.7	8.6	10.5	14.5	12.1	6.7	-0.4	-6.3	-5.4	0.9	12.3667	11.425	10.95	-10.2352	-12.2694	-5.37104	-1.47968	6.74524	8.4256	11.9632	9.84064	5.06488	-1.21436	-6.43232	-5.63636	-0.06464	10.0765	9.24367	8.82358	9.88252	7.8795	10.5365	8.45766	7.09052	7.98088	10.4464	9.83299	11.377	8.12456	9.84908	-0.327918	8.45766	7.94704	0.510623
	1955	-14.3	-12.7	-7.4	-4	2.8	8.5	14.8	13.6	8.7	-0.6	-6.2	-18	-1.2	12.3	9.925	11.4	-13.5075	-12.0925	-7.40516	-4.3982	1.61572	6.6568	12.2285	11.1672	6.83368	-1.39124	-6.34388	-16.7798	-1.92188	10.0175	7.91707	9.22156	9.89091	7.88692	10.392	8.3299	7.01068	7.88383	10.3147	9.69422	11.2256	8.06215	9.75362	-0.275382	8.3299	8.02309	0.306819
	1956	-15.9	-15.2	-6.5	-2.9	6.1	10.5	13.7	9.7	7	0.5	-10.8	-12.4	-1.4	11.3	10	10.225	-14.9226	-14.3035	-6.6092	-3.42536	4.53424	8.4256	11.2557	7.71808	5.3302	-0.4184	-10.4121	-11.8272	-2.09876	9.13312	7.9834	8.18239	9.16993	7.24929	9.75172	7.76364	6.65679	7.45369	9.7312	9.07916	10.5545	7.78551	9.33051	-0.457057	7.76364	7.76011	0.00353545
	1957	-7.4	-11.7	-8.4	0	4.2	8.3	14.7	11.1	5.8	1.1	-3.1	-8.2	0.5	11.3667	9.575	9.975	-7.40516	-11.2081	-8.28956	-0.8606	2.85388	6.47992	12.1401	8.95624	4.26892	0.11224	-3.60224	-8.11268	-0.4184	9.19208	7.60753	7.96129	8.90769	7.01736	9.45035	7.49712	6.49022	7.25123	9.45654	8.78966	10.2386	7.65531	9.13136	-0.607155	7.49712	7.54284	0.0457232
	1958	-15.4	-15.6	-10.7	-1.4	4.2	10.5	11.7	12.7	8.4	3	0.3	-12.3	-0.4	11.6333	9.775	10.825	-14.4804	-14.6572	-10.3237	-2.09876	2.85388	8.4256	9.48688	10.3713	6.56836	1.7926	-0.59528	-11.7387	-1.21436	9.42792	7.78441	8.71303	9.77063	7.78054	10.1582	8.12315	6.88147	7.72678	10.1017	9.46965	10.9806	7.96114	9.59914	-0.472173	8.12315	7.73823	0.384924
	1959	-14.4	-3.4	-1.3	0.1	5.8	11.1	13.8	12.9	6.9	2.6	-3.6	-7.7	1.9	12.6	10.9	11.175	-13.596	-3.86756	-2.01032	-0.77216	4.26892	8.95624	11.3441	10.5482	5.24176	1.43884	-4.04444	-7.67048	0.81976	10.2828	8.77936	9.02257	10.1476	8.1139	10.6978	8.60031	7.17968	8.08924	10.5934	9.98794	11.5461	8.19425	9.95567	0.00543356	8.60031	8.42957	0.170746
	1960	-15.5	-15.2	-5.9	0.4	7.7	12.5	14.5	12.4	7.6	-3.4	-6.2	-10.5	-0.1	13.1333	11.775	11.75	-14.5688	-14.3035	-6.07856	-0.50684	5.94928	10.1944	11.9632	10.106	5.86084	-3.86756	-6.34388	-10.1468	-0.94904	10.7545	9.55321	9.5311	10.2476	8.20234	11.0603	8.92096	7.38007	8.33281	10.9238	10.3362	11.9261	8.3509	10.1953	0.534944	8.92096	9.19603	0.275071
	1961	-13.8	-5.6	-3.1	-1.6	5.4	12.3	13.6	11.5	8	6	-1.9	-12.4	1.5	12.4667	10.7	11.35	-13.0653	-5.81324	-3.60224	-2.27564	3.91516	10.0175	11.1672	9.31	6.2146	4.4458	-2.54096	-11.8272	0.466	10.1649	8.60248	9.17734	10.5434	8.46394	10.9749	8.84536	7.33282	8.27538	10.8459	10.2541	11.8365	8.31396	10.1388	-0.047124	8.84536	8.35349	0.491867
	1962	-11.1	-11.5	-13	0.3	4.9	9	12	10.1	5.6	3.9	-4.8	-10.3	-0.4	10.3667	9	9.175	-10.6774	-11.0312	-12.3578	-0.59528	3.47296	7.099	9.7522	8.07184	4.09204	2.58856	-5.10572	-9.96992	-1.21436	8.30768	7.099	7.25377	8.48951	6.64752	8.89501	7.00599	6.18328	6.87815	8.95044	8.2562	9.65648	7.41537	8.76438	-0.552745	7.00599	7.6216	0.615614
	1963	-14	-13.7	-9.3	0.6	9.3	11.3	12.3	12.6	8.8	2.9	-7.5	-7.9	0.5	12.0667	11.375	11.25	-13.2422	-12.9769	-9.08552	-0.32996	7.36432	9.13312	10.0175	10.2828	6.92212	1.70416	-7.4936	-7.84736	-0.4184	9.81116	9.19945	9.0889	10.4434	8.3755	10.8708	8.7533	7.27529	8.20545	10.751	10.1541	11.7274	8.26899	10.07	0.182309	8.7533	8.68559	0.0677075
	1964	-5.4	-11.4	-6.1	0.2	6.9	9.1	11.9	10.3	5.5	4	-4.5	-7.7	1.1	10.4333	9.55	9.2	-5.63636	-10.9428	-6.25544	-0.68372	5.24176	7.18744	9.66376	8.24872	4.0036	2.677	-4.8404	-7.67048	0.11224	8.36664	7.58542	7.27588	8.64545	6.78544	9.05364	7.14628	6.27096	6.98472	9.09501	8.40858	9.82275	7.48391	8.86921	-0.562405	7.14628	7.60762	0.461341
	1965	-12.7	-7.3	-6.3	1.1	4	11.5	11.6	10.6	8.8	3.1	-8.8	-17.8	-0.2	11.2333	9.425	10.625	-12.0925	-7.31672	-6.43232	0.11224	2.677	9.31	9.39844	8.51404	6.92212	1.88104	-8.64332	-16.6029	-1.03748	9.07416	7.47487	8.53615	9.58322	7.6148	9.98813	7.97272	6.78746	7.61251	9.94665	9.30626	10.8023	7.88765	9.48673	-0.0871534	7.97272	8.29555	0.322825
	1966	-19.1	-21.9	-9.1	-3.2	5	14.7	13.1	10.7	4.7	0.5	-4.6	-8.5	-1.5	12.8333	10.875	10.8	-17.7526	-20.229	-8.90864	-3.69068	3.5614	12.1401	10.725	8.60248	3.29608	-0.4184	-4.92884	-8.378	-2.1872	10.4892	8.75725	8.69092	9.58601	7.61727	10.4369	8.36965	7.03552	7.91402	10.3557	9.73739	11.2727	8.08156	9.78332	-0.0499043	8.36965	8.34946	0.0201843
	1967	-18.4	-6.5	-2.7	-0.4	5.2	10.5	12.5	12.6	8.5	1.6	-1.3	-17.7	0.3	11.8667	10.2	11.025	-17.1336	-6.6092	-3.24848	-1.21436	3.73828	8.4256	10.1944	10.2828	6.6568	0.55444	-2.01032	-16.5145	-0.59528	9.63428	8.16028	8.88991	9.88881	7.88506	10.3436	8.28714	6.98395	7.85134	10.2706	9.64777	11.1749	8.04125	9.72166	-0.0904679	8.28714	8.29075	0.00361238
	1968	-15.4	-13.2	-4.7	0.7	3.4	11.8	12.7	11	6.4	-4.2	-10.5	-6.8	-0.7	11.8333	9.725	10.475	-14.4804	-12.5347	-5.01728	-0.24152	2.14636	9.57532	10.3713	8.8678	4.79956	-4.57508	-10.1468	-6.87452	-1.47968	9.6048	7.74019	8.40349	8.81748	6.93758	9.62144	7.64843	6.58478	7.36616	9.61247	8.95401	10.4179	7.72923	9.24442	-0.0524117	7.64843	8.34583	0.697406
	1969	-13.3	-16.6	-8.3	-0.6	4.4	13.5	13	15.7	6.2	2.3	-9.3	-12.9	-0.5	14.0667	11.65	12.1	-12.6231	-15.5416	-8.20112	-1.39124	3.03076	11.0788	10.6366	13.0245	4.62268	1.17352	-9.08552	-12.2694	-1.3028	11.58	9.44266	9.84064	10.8245	8.71257	11.5062	9.31528	7.6265	8.63235	11.3301	10.7645	12.3935	8.54354	10.4899	0.0444102	9.31528	8.48598	0.829295
	1970	-15.8	-18.9	-5.4	-2.6	6.1	15.3	13.3	12.3	6.2	0.9	-7.5	-5.7	-0.1	13.6333	11.75	11.775	-14.8341	-17.5758	-5.63636	-3.16004	4.53424	12.6707	10.9019	10.0175	4.62268	-0.06464	-7.4936	-5.90168	-0.94904	11.1967	9.5311	9.55321	10.5196	8.44292	11.3316	9.16089	7.53002	8.51507	11.171	10.5968	12.2105	8.46811	10.3745	-0.269802	9.16089	8.03116	1.12973
	1971	-9.2	-9.8	-11.9	-1.8	5.2	10.8	12.7	11.3	6.2	0.8	-8.3	-6.1	0	11.6	10	10.25	-8.99708	-9.52772	-11.385	-2.45252	3.73828	8.69092	10.3713	9.13312	4.62268	-0.15308	-8.20112	-6.25544	-0.8606	9.39844	7.9834	8.2045	9.16364	7.24372	9.75676	7.7681	6.65958	7.45707	9.73579	9.084	10.5598	7.78769	9.33384	-0.402781	7.7681	7.83867	0.0705725
	1972	-14.6	-8.9	-4.1	-0.3	5.3	13.3	15.5	11.9	6.2	1.9	-4.8	-3.2	1.5	13.5667	11.5	11.725	-13.7728	-8.73176	-4.48664	-1.12592	3.82672	10.9019	12.8476	9.66376	4.62268	0.81976	-5.10572	-3.69068	0.466	11.1378	9.31	9.50899	10.5238	8.44663	11.2723	9.1084	7.49721	8.4752	11.1169	10.5398	12.1483	8.44247	10.3353	0.28916	9.1084	8.84026	0.268137
	1973	-4	-9.4	-1.7	-1.5	5.4	11.9	16.9	10.8	4.2	-1.8	-7.6	-13.5	0.9	13.2	11.25	10.95	-4.3982	-9.17396	-2.36408	-2.1872	3.91516	9.66376	14.0858	8.69092	2.85388	-2.45252	-7.58204	-12.8	-0.06464	10.8135	9.0889	8.82358	9.57133	7.60428	10.505	8.4298	7.07311	7.95972	10.4177	9.80273	11.344	8.11095	9.82827	-0.144804	8.4298	8.2121	0.217707
	1974	-5.8	-6.2	-5.6	1.8	6.9	12.6	12.7	11.7	8.9	0.4	-6.3	-9.2	1.8	12.3333	10.975	11.475	-5.99012	-6.34388	-5.81324	0.73132	5.24176	10.2828	10.3713	9.48688	7.01056	-0.50684	-6.43232	-8.99708	0.73132	10.047	8.84569	9.28789	10.2678	8.22027	10.8463	8.73171	7.2618	8.18906	10.7288	10.1307	11.7018	8.25844	10.0539	0.00776873	8.73171	8.43295	0.298767
	1975	-8.9	-4.4	-3	-1.2	6.1	9.3	12.9	11.6	7.9	2.2	-2.1	-7	2	11.2667	9.975	10.425	-8.73176	-4.75196	-3.5138	-1.92188	4.53424	7.36432	10.5482	9.39844	6.12616	1.08508	-2.71784	-7.0514	0.9082	9.10364	7.96129	8.35927	9.48811	7.53069	9.90138	7.896	6.73951	7.55423	9.86759	9.22292	10.7113	7.85017	9.42941	-0.131453	7.896	8.23142	0.335421
	1976	-16.9	-7.6	-8	-0.8	8.2	10.8	13	12.6	3.8	-0.3	-4.5	-11.4	-0.1	12.1333	11.15	10.05	-15.807	-7.58204	-7.9358	-1.56812	6.39148	8.69092	10.6366	10.2828	2.50012	-1.12592	-4.8404	-10.9428	-0.94904	9.87012	9.00046	8.02762	9.1035	7.19053	9.84496	7.8461	6.70832	7.51632	9.81617	9.16873	10.6522	7.8258	9.39212
	1977	-12.6	-15.6	-3.4	-2.7	4.1	9.9	12.6	11.5	6.2	1.9	-4.9	-6.4	0.1	11.3333	9.525	10.05	-12.004	-14.6572	-3.86756	-3.24848	2.76544	7.89496	10.2828	9.31	4.62268	0.81976	-5.19416	-6.52076	-0.77216	9.1626	7.56331	8.02762	9.01958	7.11632	9.53138	7.56878	6.53501	7.30566	9.53039	8.8675	10.3235	7.69031	9.1849
	1978	-11.6	-16.5	-7	-2.1	5.3	11.7	13.5	10.9	5.7	1	-5.6	-19	-1.1	12.0333	10.35	10.45	-11.1196	-15.4532	-7.0514	-2.71784	3.82672	9.48688	11.0788	8.77936	4.18048	0.0238	-5.81324	-17.6642	-1.83344	9.78168	8.29294	8.38138	9.35734	7.41503	10.0263	8.00651	6.80857	7.63817	9.98147	9.34296	10.8423	7.90416	9.51198
	1979	-18	-13	-4.6	-1	5.7	12.7	13.5	11.8	6	-0.8	-4.9	-10.7	-0.3	12.6667	10.925	11	-16.7798	-12.3578	-4.92884	-1.745	4.18048	10.3713	11.0788	9.57532	4.4458	-1.56812	-5.19416	-10.3237	-1.12592	10.3418	8.80147	8.8678	9.6993	7.71746	10.4661	8.39545	7.05164	7.93362	10.3823	9.76541	11.3033	8.09417	9.80259
	1980	-15.6	-15.4	-8.7	1.6	6	14.2	15.4	12.3	8	-1.3	-11.3	-12.9	-0.6	13.9667	11.975	12.475	-14.6572	-14.4804	-8.55488	0.55444	4.4458	11.6979	12.7592	10.0175	6.2146	-2.01032	-10.8543	-12.2694	-1.39124	11.4915	9.73009	10.1723	10.9308	8.80657	11.7559	9.53612	7.76452	8.8001	11.5577	11.0044	12.6552	8.65142	10.6549
	1981	-11.2	-11.6	-11.3	-0.2	8.2	9.5	13.5	11.1	7.3	0.7	-7.8	-18.5	-0.9	11.3667	10.575	10.35	-10.7659	-11.1196	-10.8543	-1.03748	6.39148	7.5412	11.0788	8.95624	5.59552	-0.24152	-7.75892	-17.222	-1.65656	9.19208	8.49193	8.29294	9.43217	7.48121	9.94719	7.93651	6.76483	7.585	9.90934	9.26693	10.7594	7.86996	9.45968
	1982	-16.6	-7	-3.1	0.6	5.1	8.8	13.5	12.1	6.7	1.4	-3.7	-8.3	0.8	11.4667	9.875	10.275	-15.5416	-7.0514	-3.60224	-0.32996	3.64984	6.92212	11.0788	9.84064	5.06488	0.37756	-4.13288	-8.20112	-0.15308	9.28052	7.87285	8.22661	9.23986	7.31113	9.72599	7.74089	6.64257	7.4364	9.70775	9.05444	10.5275	7.7744	9.31351
	1983	-9.7	-8.4	-5.5	0.6	7.8	10.3	13.4	10.7	7.4	1.3	-7	-9.8	0.9	11.4667	10.55	10.45	-9.43928	-8.28956	-5.7248	-0.32996	6.03772	8.24872	10.9904	8.60248	5.68396	0.28912	-7.0514	-9.52772	-0.06464	9.28052	8.46982	8.38138	9.53776	7.5746	10.06	8.03631	6.82719	7.66081	10.0122	9.37532	10.8776	7.91872	9.53424
	1984	-15.7	-6	-8	1.7	10.2	11.4	12.9	11.3	6	1.4	-6.5	-5.7	1.1	11.8667	11.45	10.4	-14.7457	-6.167	-7.9358	0.64288	8.16028	9.22156	10.5482	9.13312	4.4458	0.37756	-6.6092	-5.90168	0.11224	9.63428	9.26578	8.33716	9.65594	7.67912	10.2689	8.22101	6.94263	7.80111	10.2025	9.57594	11.0965	8.00895	9.67225
	1985	-18.6	-21.5	-5.7	-2.4	4	11.7	13.4	11.5	5.8	3.1	-8.6	-18.5	-2.1	12.2	10.15	10.6	-17.3104	-19.8752	-5.90168	-2.98316	2.677	9.48688	10.9904	9.31	4.26892	1.88104	-8.46644	-17.222	-2.71784	9.92908	8.11606	8.51404	9.58112	7.61294	10.1714	8.13476	6.88872	7.73559	10.1136	9.48226	10.9943	7.96681	9.6078
	1986	-18.7	-11.5	-2.3	-2.2	7.4	14.3	13.5	9	4.3	2.8	-2.6	-12.9	0.1	12.2667	11.05	10.275	-17.3989	-11.0312	-2.89472	-2.80628	5.68396	11.7863	11.0788	7.099	2.94232	1.61572	-3.16004	-12.2694	-0.77216	9.98804	8.91202	8.22661	9.48042	7.52388	10.2566	8.21012	6.93582	7.79284	10.1913	9.56412	11.0836	8.00363	9.66412
	1987	-20.4	-13	-9.1	0.2	5	10.7	12.3	9.1	6	4.8	-3.6	-9.4	-0.6	10.7	9.275	9.525	-18.9024	-12.3578	-8.90864	-0.68372	3.5614	8.60248	10.0175	7.18744	4.4458	3.38452	-4.04444	-9.17396	-1.39124	8.60248	7.34221	7.56331	8.86014	6.97531	9.30061	7.36469	6.40746	7.15063	9.32008	8.64582	10.0816	7.59061	9.03241
	1988	-9.2	-10.3	-7.6	-2.4	6.5	13.6	15.6	11.2	7.9	0.4	-6.4	-10.2	0.8	13.4667	11.725	12.075	-8.99708	-9.96992	-7.58204	-2.98316	4.888	11.1672	12.936	9.04468	6.12616	-0.50684	-6.52076	-9.88148	-0.15308	11.0493	9.50899	9.81853	10.7629	8.65814	11.5088	9.31754	7.62792	8.63407	11.3325	10.767	12.3962	8.54464	10.4916
	1989	-3.4	-5	-2.6	0.9	6.6	11.8	12.8	11.4	7.5	1.1	-2	-11.3	2.3	12	10.65	10.875	-3.86756	-5.2826	-3.16004	-0.06464	4.97644	9.57532	10.4597	9.22156	5.7724	0.11224	-2.6294	-10.8543	1.17352	9.7522	8.55826	8.75725	9.8028	7.80899	10.3803	8.31955	7.00421	7.87596	10.304	9.68297	11.2133	8.05709	9.74588
	1990	-12	-1.4	-2.7	1.4	7.2	12.1	13.7	12.9	6.8	2.8	-5.3	-4.8	2.5	12.9	11.475	11.375	-11.4734	-2.09876	-3.24848	0.37756	5.50708	9.84064	11.2557	10.5482	5.15332	1.61572	-5.54792	-5.10572	1.3504	10.5482	9.28789	9.19945	10.4196	8.35448	11.0091	8.87567	7.35177	8.29841	10.8771	10.287	11.8725	8.32877	10.1614
	1991	-7.7	-14.4	-4.7	1	4.6	9.9	14.7	13.8	5.6	1.5	-2.9	-4.3	1.5	12.8	10.75	11	-7.67048	-13.596	-5.01728	0.0238	3.20764	7.89496	12.1401	11.3441	4.09204	0.466	-3.42536	-4.66352	0.466	10.4597	8.6467	8.8678	9.84545	7.84672	10.461	8.39094	7.04883	7.9302	10.3776	9.76052	11.298	8.09197	9.79923
	1992	-6.3	-4.3	-1.6	-2.8	8.3	13.3	11.7	10.2	7.3	-4.7	-6.7	-4.6	1.6	11.7333	10.875	10.625	-6.43232	-4.66352	-2.27564	-3.33692	6.47992	10.9019	9.48688	8.16028	5.59552	-5.01728	-6.78608	-4.92884	0.55444	9.51636	8.75725	8.53615	9.1972	7.27341	10.0189	7.9999	6.80444	7.63315	9.97465	9.33577	10.8345	7.90093	9.50704					m
	1993	-8.8	-7.4	-3.5	0.5	8.2	8.4	13.6	10.8	5	-0.5	-5.2	-10.4	0.9	10.9333	10.25	9.45	-8.64332	-7.40516	-3.956	-0.4184	6.39148	6.56836	11.1672	8.69092	3.5614	-1.3028	-5.45948	-10.0584	-0.06464	8.80884	8.2045	7.49698	8.57483	6.72298	9.17852	7.25672	6.33998	7.06861	9.20881	8.52854	9.95365	7.53786	8.95173					std err m
	1994	-14.6	-17.3	-6.5	2	5	9.2	15.9	12.5	6.2	0.5	-5.3	-4.9	0.2	12.5333	10.65	10.95	-13.7728	-16.1607	-6.6092	0.9082	3.5614	7.27588	13.2014	10.1944	4.62268	-0.4184	-5.54792	-5.19416	-0.68372	10.2239	8.55826	8.82358	9.74406	7.75704	10.3693	8.30984	6.99814	7.86859	10.294	9.67243	11.2018	8.05234	9.73863					R^2
	1995	-9.1	-6.4	-2.7	-1.1	5.1	12.1	12	11.8	6.6	2.8	-6	-11.5	1.1	11.9667	10.25	10.625	-8.90864	-6.52076	-3.24848	-1.83344	3.64984	9.84064	9.7522	9.57532	4.97644	1.61572	-6.167	-11.0312	0.11224	9.72272	8.2045	8.53615	9.63846	7.66366	10.1853	8.14711	6.89644	7.74498	10.1264	9.49568	11.009	7.97285	9.61704					F
	1996	-8	-12.8	-4.9	0.9	5.6	10.9	12.9	14.7	7.1	2.9	-8.5	-12.2	0.7	12.8333	11.025	11.4	-7.9358	-12.1809	-5.19416	-0.06464	4.09204	8.77936	10.5482	12.1401	5.41864	1.70416	-8.378	-11.6503	-0.24152	10.4892	8.88991	9.22156	10.3552	8.29758	10.8566	8.74073	7.26743	8.19591	10.7381	10.1405	11.7125	8.26285	10.0606					expl var

























[truncated: 11 more columns]

## Sheet: Summary
yr AD	NAO	new NAO	NAO JJA	EA	SCAND		NCS SGI	SGI N (N=25)	SGI N (N=15)	SGI C (N=13)	SGI S (N=33)	av NCS means	std av…	SWE T(air)	Stensele JJA(air)	Uppsala JJA(air)	Karlshamn JJA(air)	SWE T(water reco)	Stensele JJA(water reco)	Uppsala JJA(water reco)	Karlshamn JJA(water reco)	Tw weighted entire growing season	ED-GJ-A1L					NAO		ED-NJB-A6R				SGI	δ13Cs* (‰)	δ18Os* (‰)	δ13Cs(d)* (‰)	δ18Owr* (‰)	δ18Owr(SGI)* (‰)		ED-NJB-A4R				SGI	δ13Cs* (‰)	δ18Os* (‰)	δ13Cs(d)* (‰)	δ18Owr* (‰)
1725											0.216179	0.216179	0.410614
1726											-0.0986138	-0.0986138	-0.233079
1727											-0.0914407	-0.0914407	-0.218412
1728											0.192075	0.192075	0.361325
1729
1730
1731
1732
1733
1734
1735
1736
1737
1738
1739
1740
1741
1742
1743
1744
1745
1746
1747
1748
1749
1750
1751
1752
1753
1754
1755
1756
1757
1758
1759
1760
1761
1762
1763
1764
1765
1766
1767
1768
1769
1770							0.216179
1771							-0.0986138
1772							-0.0914407
1773							0.192075
1774							-0.0186483				-0.0186483	-0.0186483	-0.0695648
1775							-0.173781				-0.173781	-0.173781	-0.386782
1776							-0.211619				-0.211619	-0.211619	-0.464155
1777							0.210906				0.210906	0.210906	0.39983
1778							0.286936				0.286936	0.286936	0.555298
1779							0.12279				0.12279	0.12279	0.21965
1780							-0.713227				-0.713227	-0.713227	-1.48985
1781							-0.126709				-0.126709	-0.126709	-0.290528
1782							0.0738309				0.0738309	0.0738309	0.119538
1783							0.786673				0.786673	0.786673	1.57717
1784							0.418612				0.418612	0.418612	0.824551
1785							-0.858563				-0.858563	-0.858563	-1.78703
1786							-0.217181				-0.217181	-0.217181	-0.475528
1787							-0.964817				-0.964817	-0.964817	-2.0043
1788							0.659017				0.659017	0.659017	1.31613
1789							1.23267				1.23267	1.23267	2.48916
1790							-0.103915				-0.103915	-0.103915	-0.243918
1791							-0.0983269				-0.0983269	-0.0983269	-0.232493
1792							0.446247				0.446247	0.446247	0.88106
1793							-0.885503				-0.885503	-0.885503	-1.84212
1794							-0.189645				-0.189645	-0.189645	-0.419221
1795							-0.0969708				-0.0969708	-0.0969708	-0.22972
1796							0.370325				0.370325	0.370325	0.725813
1797							0.364854				0.364854	0.364854	0.714627
1798							-0.228205				-0.228205	-0.228205	-0.498069
1799							-0.144454				-0.144454	-0.144454	-0.326814
1800							-0.469804				-0.469804	-0.469804	-0.992094
1801							0.238769				0.238769	0.238769	0.456806
1802							0.498707				0.498707	0.498707	0.988331
1803							0.347295				0.347295	0.347295	0.67872
1804							-0.425953				-0.425953	-0.425953	-0.902427
1805							-0.320136				-0.320136	-0.320136	-0.686051
1806							-0.636148				-0.636148	-0.636148	-1.33224
1807							0.442309				0.442309	0.442309	0.873006
1808							0.145475				0.145475	0.145475	0.266037
1809							0.774178				0.774178	0.774178	1.55162
1810							-0.258796				-0.258796	-0.258796	-0.560622
1811							0.15374				0.15374	0.15374	0.282936
1812							-0.203273				-0.203273	-0.203273	-0.447088
1813							-0.329106				-0.329106	-0.329106	-0.704392
1814							0.102397				0.102397	0.102397	0.177951
1815							0.0734902				0.0734902	0.0734902	0.118841
1816							0.21834				0.21834	0.21834	0.415031
1817							0.226195				0.226195	0.226195	0.431094
1818							-0.553275				-0.553275	-0.553275	-1.16278
1819						10.5941	0.249547	1.50081			0.249547	0.875179	1.75815
1820						8.97976	-0.0723014	0.385532			-0.0723014	0.156616	0.288817
1821						7.87009	-0.338318	-0.381075			-0.338318	-0.359696	-0.766945
1822						10.5035	0.379938	1.4382			0.379938	0.909072	1.82745
1823						8.16184	0.476951	-0.179524			0.476951	0.148713	0.272658
1824						6.23836	-0.168254	-1.50835			-0.168254	-0.838304	-1.74561
1825						9.14745	-1.06382	0.501379			-1.06382	-0.281221	-0.606478
1826		0.2525				8.2243	0.527479	-0.136373			0.527479	0.195553	0.368437
1827		-0.5175				8.32038	0.148076	-0.0699938			0.148076	0.0390411	0.0483992
1828		0.2525				8.20115	-0.165879	-0.15237			-0.165879	-0.159124	-0.356812
1829		-1.395				6.71304	0.213527	-1.18042			0.213527	-0.483448	-1.01999
1830		0.59				6.94075	0.0676693	-1.02311			0.0676693	-0.477719	-1.00828
1831		0.2125				6.55768	-0.0828142	-1.28775			-0.0828142	-0.685283	-1.43271
1832		0.5725				5.64414	-0.31072	-1.91886			-0.31072	-1.11479	-2.31098
1833		-0.145				6.44892	-0.209833	-1.36289			-0.209833	-0.786361	-1.63939
1834		1.8125				10.7898	-0.414539	1.63596			-0.414539	0.610711	1.21736
1835		1.3175				8.67668	0.748217	0.176149			0.748217	0.462183	0.913646
1836		1.0575				11.3076	-0.0375677	1.99373			-0.0375677	0.978083	1.96857
1837		0.34				10.3822	0.263814	1.35442			0.263814	0.809119	1.62307
1838		-0.7075				8.99279	-0.368186	0.394536			-0.368186	0.0131747	-0.00449263
1839		1.535				8.74937	-0.39229	0.226367			-0.39229	-0.0829614	-0.201073
1840		-0.0325				8.77573	-0.138213	0.244581			-0.138213	0.0531842	0.0773192
1841		0.02				9.31019	0.555414	0.613809			0.555414	0.584612	1.16399
1842		2.58				9.99448	-0.245383	1.08655			-0.245383	0.420582	0.828579
1843		-0.6225				10.9302	-0.139048	1.73296			-0.139048	0.796956	1.59819
1844		0.4875				7.80726	0.0705283	-0.424486			0.0705283	-0.176979	-0.393321
1845		0.1175				7.06673	0.798274	-0.936078			0.798274	-0.0689021	-0.172324
1846		1.245				7.94204	-0.577807	-0.331374			-0.577807	-0.454591	-0.960986
1847		-0.3				8.38183	0.202482	-0.0275435			0.202482	0.0874692	0.147426
1848		0.59				6.03013	-0.902919	-1.65221			-0.902919	-1.27756	-2.64382
1849		1.175				7.34517	-0.707691	-0.743714			-0.707691	-0.725702	-1.51536
1850		0.4175				8.71038	0.858629	0.199435			0.858629	0.529032	1.05034
1851		1.505				9.6416	0.250654	0.84276			0.250654	0.546707	1.08648
1852		-0.0975				10.3323	0.441337	1.31992			0.441337	0.880627	1.76929
1853		-0.8375				10.1681	-1.05631	1.20649			-1.05631	0.0750915	0.122116
1854		1.22				10.9803	-1.23849	1.76757			-1.23849	0.264543	0.509509
1855		-1.2325				8.0776	1.22095	-0.237718			1.22095	0.491614	0.973826
1856		-1.1				7.63199	2.17678	-0.54557			2.17678	0.815607	1.63633
1857		0.56				6.5349	0.990638	-1.30349			0.990638	-0.156426	-0.351295
1858		0.3625				6.08077	0.225217	-1.61722			0.225217	-0.696001	-1.45463
1859		1.6425				8.04942	-1.88756	-0.257188			-1.88756	-1.07238	-2.22424
1860		0.845				9.30759	-0.0851117	0.612016	0.411733		-0.581956	0.147264	0.269695	14.8667	13.6	15.7	15.3	12.2875	11.1672	13.0245	12.6707	9.04544
1861		0.41				8.80391	0.709333	0.264047	0.0527396		1.36593	0.560904	1.11551	15.7	13.9	17	16.2	13.0245	11.4326	14.1742	13.4667	9.12524
1862		-0.6625				8.65901	-0.0146358	0.163943	0.219883		-0.249155	0.0448903	0.0603599	12.6444	10.5333	13.5333	13.8667	10.3221	8.45508	11.1083	11.4031	7.3235
1863		1.48				8.33134	-1.20646	-0.062422	-0.0341042		-2.37881	-0.825113	-1.71864	13.9	12.2	14.6	14.9	11.4326	9.92908	12.0516	12.317	8.39236
1864	-1.02	0.24				7.8749	-0.827094	-0.377756	0.224732		-2.93074	-1.02792	-2.13334	13	11.0667	13.8667	14.0667	10.6366	8.92676	11.4031	11.58	7.00661						-1.02
1865	-1.24	-0.435	0.9			8.31292	0.109141	-0.0751473	0.182745		-0.0380685	0.0231765	0.0159591	13.2556	10.5	14.7	14.5667	10.8626	8.4256	12.1401	12.0222	6.95997						-1.24
1866	0.54	0.2475	0.2			7.86666	0.0763609	-0.383444	-0.219132		0.667346	0.02159	0.0127151	14.2444	12.1667	14.6	15.9667	11.7372	9.8996	12.0516	13.2603	8.32534						0.54
1867	-1.38	-0.315	0			8.03074	-0.52502	-0.270096	-0.545665		-0.483731	-0.433164	-0.917172	13.1222	11.1667	13.4333	14.7667	10.7447	9.0152	11.0198	12.199	7.32708						-1.38
1868	2.81	2.07	2.8			9.13306	0.0562821	0.491439	0.537742		-0.906638	0.0408476	0.0520933	16.0556	12.8	17.2333	18.1333	13.3389	10.4597	14.3806	15.1765	8.2997						2.81
1869	1.7	1.705	-1.7			8.04827	-0.0448491	-0.257985	0.273735		-1.0006	-0.328284	-0.702712	13.3778	11.1333	13.6667	15.3333	10.9707	8.98572	11.2262	12.7002	7.37765						1.7
1870	-3.01	-0.7975	-1.3			8.52846	-0.131255	0.0737572	0.329582		-1.51377	-0.370143	-0.788306	14.5444	13.1333	14.7667	15.7333	12.0025	10.7545	12.199	13.054	8.85086						-3.01
1871	-1.01	0.7775	-0.1			8.44383	0.323349	0.0152877	0.18958		0.724653	0.30984	0.602134	13.6222	12.0333	14	14.8333	11.1869	9.78168	11.521	12.258	7.70186						-1.01
1872	-0.76	0.07	-2.1			8.57679	0.468586	0.107142	0.121613		1.5095	0.57942	1.15337	15.2778	13.9333	15.5333	16.3667	12.6511	11.462	12.8771	13.6141	9.0391						-0.76
1873	-0.5	0.3225	2.6			7.20544	-0.727771	-0.840249	-0.803142		-0.426285	-0.689892	-1.44213	15.3333	13.8667	15.9667	16.1667	12.7002	11.4031	13.2603	13.4372	9.3196						-0.5
1874	2.32	1.305	0.9			8.11552	-0.058342	-0.211522	-0.242797		0.679477	0.0750528	0.122037	13.6333	10.7667	14.7	15.4333	11.1967	8.66144	12.1401	12.7886	7.38588						2.32
1875	-1.35	0.1125	0.5			8.75162	0.298505	0.227925	0.146184		0.907787	0.427299	0.842314	14.7889	12.1667	15.6	16.6	12.2187	9.8996	12.936	13.8204	8.00298						-1.35
1876	0.21	0.3625	3			7.42111	-0.213323	-0.691251	-0.567301		1.20259	-0.0186546	-0.0695777	15.7889	14.1	16.3	16.9667	13.1031	11.6094	13.5551	14.1447	9.36085						0.21
1877	0.05	0.92	-2.2			8.0996	-0.0644982	-0.222523	-0.123836		0.172855	-0.0578349	-0.149694	13.6111	11.1	14.5333	15.2	11.1771	8.95624	11.9927	12.5823	6.9992						0.05
1878	1.46	0.855	-2.2			8.86891	0.303465	0.308957	0.17121		0.832484	0.43755	0.863277	14.0778	11.9	14.3667	15.9667	11.5898	9.66376	11.8453	13.2603	8.30173						1.46
1879	-2.22	-0.215	-1.3			8.90912	0.202261	0.336729	0.335181		-0.329416	0.114165	0.202013	14.4222	12.9667	15.1333	15.1667	11.8944	10.6071	12.5233	12.5528	8.74282						-2.22
1880	0.89	0.51	-1.9			8.13115	-0.361159	-0.200726	-0.363667		-0.351129	-0.305174	-0.655456	14.8556	12.0333	16.0333	16.5	12.2777	9.78168	13.3193	13.732	7.94543						0.89
1881	-3.8	-1.435	1			7.74295	-0.411212	-0.468913	-0.513772		-0.000971387	-0.327886	-0.701898	13.2333	11.0333	13.9333	14.7333	10.843	8.89728	11.462	12.1696	7.2663						-3.8
1882	3.87	2.4925	1.2			8.91273	0.556999	0.339224	0.622241		0.296031	0.419166	0.825683	14.9556	12.9667	15.7	16.2	12.3661	10.6071	13.0245	13.4667	9.02335						3.87
1883	-0.23	0.9925	-1.8			8.79129	0.551643	0.255328	0.657944		0.339041	0.417438	0.82215	14.7444	13.2667	14.9667	16	12.1794	10.8724	12.3759	13.2898	8.93305						-0.23
1884	1.44	1.4075	-0.3			8.29573	-0.278919	-0.0870225	-0.159302		-0.518154	-0.254826	-0.552504	13.7778	12.0333	13.8333	15.4667	11.3245	9.78168	11.3736	12.8181	8.19432						1.44
1885	0.89	-0.2975	-1.3			7.68932	-0.747696	-0.505959	-0.623269		-0.996548	-0.708592	-1.48037	13.0889	10.5	13.6	15.1667	10.7152	8.4256	11.1672	12.5528	6.49469						0.89
1886	-1.12	-0.2625	2.3			7.59197	0.0188595	-0.573216	-0.61632		1.28922	0.0332273	0.0365111	14.1667	11.9667	15.1667	15.3667	11.6684	9.72272	12.5528	12.7297	8.04372						-1.12
1887	0.45	0.69	-2.4			7.66203	-0.420143	-0.524814	-0.59182		-0.0767895	-0.397808	-0.844876	13.8222	10.6667	14.9667	15.8333	11.3638	8.573	12.3759	13.1424	7.26116						0.45
1888	-2.75	-1.045	-2			8.10924	-0.578819	-0.215862	-0.121545		-1.49337	-0.610258	-1.2793	13.0333	11	13.5667	14.5333	10.6661	8.8678	11.1378	11.9927	7.01728						-2.75
1889	-0.1	0.1425	0.3			8.28915	-0.101437	-0.0915703	0.0217906		-0.409505	-0.159762	-0.358115	14.7556	12	15.6	16.6667	12.1892	9.7522	12.936	13.8794	8.18623						-0.1
1890	1.78	1.0225	2			7.82276	-0.399614	-0.413777	-0.70811		0.371627	-0.250087	-0.542814	13.4556	11.1667	14.3	14.9	11.0395	9.0152	11.7863	12.317	7.60898						1.78
1891	-0.82	0.6275	-3.3			7.55518	-0.947827	-0.598629	-1.38159		0.136569	-0.614549	-1.28807	13.7889	11.0667	14.7	15.6	11.3343	8.92676	12.1401	12.936	7.43179						-0.82
1892	-2.02	-1.12	-1.1			8.46061	-0.541014	0.0268818	-0.556202		-0.503043	-0.344121	-0.735096	13.1778	10.4	14.0667	15.0667	10.7938	8.33716	11.58	12.4644	6.75951						-2.02
1893	-1.07	0.0625	-2.8			8.56796	-0.0170425	0.101042	0.259913		-0.70943	-0.116159	-0.268955	14.3	11.5333	15.2667	16.1	11.7863	9.33948	12.6412	13.3782	7.21262						-1.07
1894	2.68	1.5925	2.2			9.03272	0.182741	0.422122	0.421568		-0.414327	0.143121	0.261223	15.0889	13.9333	15.1333	16.2	12.484	11.462	12.5233	13.4667	8.98						2.68
1895	-3.97	-1.5375	-0.4			10.4079	1.1521	1.37214	1.49232		0.301544	1.05534	2.12653	14.3	12.2333	15	15.6667	11.7863	9.95856	12.4054	12.995	8.373						-3.97
1896	1.12	0.8125	0.7			9.00542	0.39934	0.403262	0.35203		0.517614	0.424302	0.836186	15.3889	12.6667	16.4667	17.0333	12.7493	10.3418	13.7025	14.2037	8.44384						1.12
1897	1.09	0.905	-1.2			9.01208	0.406239	0.407861	0.220788		0.869868	0.499505	0.989963	15.3667	12.2333	16.8	17.0667	12.7297	9.95856	13.9973	14.2332	8.53019						1.09
1898	1.02	0.5975	-0.9			8.5218	0.139328	0.0691509	0.229975		-0.0872892	0.0706123	0.112957	13.5111	11.7333	14.1333	14.6667	11.0886	9.51636	11.6389	12.1106	7.88672						1.02
1899	0.03	-0.115	0.5			8.63225	0.428179	0.145461	0.399563		0.49972	0.348248	0.68067	14.1222	11.7	14.7	15.9667	11.6291	9.48688	12.1401	13.2603	7.56273						0.03
1900	-2.13	-1.015	-0.6			7.83486	-0.308304	-0.405416	-0.388578		-0.10762	-0.300538	-0.645977	14.3667	11.1333	15.7667	16.2	11.8453	8.98572	13.0834	13.4667	7.2624						-2.13
1901	-0.33	-0.6075	2			8.71335	0.428481	0.201486	0.361828		0.595113	0.386142	0.758157	16.6333	14.5	18.1333	17.2667	13.8499	11.9632	15.1765	14.41	10.0922						-0.33
1902	-1.41	0.0275	-4.2			7.72633	-0.403504	-0.480393	-0.628905	-0.596834	0.256665	-0.362367	-0.772405	12.1	9.86667	12.6333	13.8	9.84064	7.86548	10.3123	11.3441	6.34018						-1.41
1903	3.89	2.44	-1.9			8.54903	0.203961	0.0879673	0.0658159	-0.118915	0.710761	0.186407	0.349736	13.2222	10.6	14.2	14.8667	10.8331	8.51404	11.6979	12.2875	7.03713						3.89
1904	0.23	0.905	-2			7.93522	0.0853573	-0.336085	-0.0830428	0.0717472	0.513162	0.0414455	0.0533158	13.2667	10.6667	14.1	15.0333	10.8724	8.573	11.6094	12.4349	7.23897						0.23
1905	1.98	1.6875	0.2			8.1235	-0.0595525	-0.206009	-0.219066	0.330655	0.144127	0.0124269	-0.00602174	14.7333	12.1333	15.6	16.4667	12.1696	9.87012	12.936	13.7025	7.92753						1.98
1906	2.06	0.9375	-0.5			8.71433	0.0734905	0.202163	0.29961	0.0533146	-0.481721	0.0183417	0.00607296	14.3889	12	15.0667	16.1	11.8649	9.7522	12.4644	13.3782	8.17735						2.06
1907	2.06	1.3725	-1			8.46169	-0.262862	0.0276295	-0.0563609	-1.07815	-0.371472	-0.369589	-0.787173	12.8333	10.9667	13.5333	14	10.4892	8.83832	11.1083	11.521	7.35311						2.06
1908	1.44	0.98	0.2			8.10079	0.00334671	-0.221701	-0.247546	0.928491	0.168006	0.156812	0.28922	14.3556	11.9333	15.0333	16.1	11.8355	9.69324	12.4349	13.3782	7.9884						1.44
1909	0	-0.045	2.1			7.92497	-0.228647	-0.343161	-0.259071	-0.172052	-0.180883	-0.238792	-0.519717	13.8667	11.9	14.7	15	11.4031	9.66376	12.1401	12.4054	8.04884						0
1910	2.1	1.7175	-0.8			8.1227	0.0771281	-0.206565	-0.337907	-0.043133	1.17485	0.14681	0.268767	14.4111	12.1333	14.6	16.5	11.8846	9.87012	12.0516	13.732	8.25779						2.1
1911	0.29	0.355	-1.3			8.04365	-0.0615572	-0.261172	-0.199339	0.0946039	0.204816	-0.0402728	-0.113783	14.7111	12.2	15.6	16.3333	12.1499	9.92908	12.936	13.5846	8.36595						0.29
1912	0.24	0.405	-1.1			8.94601	0.4698	0.362218	0.562596	-0.0965114	0.520967	0.337317	0.658319	15.2667	13.5333	16.1667	16.1	12.6412	11.1083	13.4372	13.3782	8.94717						0.24
1913	2.69	1.49	0.9			8.27489	-0.179045	-0.101421	-0.116326	-0.348262	-0.251235	-0.204311	-0.449211	14.4778	12.5667	15.0333	15.8333	11.9435	10.2534	12.4349	13.1424	8.54496						2.69
1914	1.48	1.405	1.4			9.30421	0.860766	0.609676	0.783938	1.36978	0.81914	0.895634	1.79997	16.0444	13.4	17.2667	17.4667	13.3291	10.9904	14.41	14.5869	9.00623						1.48
1915	-0.2	0.1975	-2.7			8.34516	-0.108216	-0.0528791	-0.0543731	-0.439414	-0.0875556	-0.158555	-0.355649	13.5778	11.2	14.3667	15.1667	11.1476	9.04468	11.8453	12.5528	7.13383						-0.2
1916	-0.69	0.285	-1.7			8.89774	-0.0360963	0.32887	0.170345	-1.50312	0.108844	-0.223766	-0.488992	13.6556	12.3667	13.9333	14.6667	11.2164	10.0765	11.462	12.1106	7.90108						-0.69
1917	-3.8	-1.325	-0.8			9.08809	0.615045	0.460372	0.508676	0.676748	0.77176	0.604389	1.20443	16.0222	13.7	17.0667	17.3	13.3095	11.2557	14.2332	14.4395	8.93143						-3.8
1918	-0.8	0.845	0.1			9.49077	0.496148	0.738564	0.757505	0.771209	-0.0311326	0.559036	1.11169	14	11.9	14.8	15.3	11.521	9.66376	12.2285	12.6707	7.94136						-0.8
1919	-0.8	-0.06	1.6			9.2824	0.488175	0.594611	1.06456	0.768748	-0.565994	0.465482	0.920391	13.9778	12.3667	14.9667	14.6	11.5013	10.0765	12.3759	12.0516	8.54078	1	225.464	199.234	1.13165	0.705562	-0.8
1920	3.18	1.915	0.8			8.18763	0.143199	-0.161708	0.0129015	-0.0523042	0.35921	0.0395248	0.0493884	14.0222	11.8	15.0667	15.2	11.5407	9.57532	12.4644	12.5823	8.34015	2	216.796	191.236	1.13366	0.716128	3.18
1921	1.63	1.6425	-0.7			8.5944	0.0583608	0.119308	-0.187042	-0.396356	0.394833	-0.0173139	-0.0668362	13.4778	10.6333	14.5667	15.2333	11.0591	8.54352	12.0222	12.6118	7.24483	3	207.6	183.256	1.13284	0.711816	1.63
1922	1.85	0.885	3.3			8.32416	0.142321	-0.0673878	0.26613	-1.06993	0.296558	-0.143657	-0.325185	13.6333	11.9667	14.6333	14.3	11.1967	9.72272	12.0811	11.7863	8.07359	4	207.275	175.327	1.18222	0.971289	1.85
1923	1.73	1.2575	1.7			7.84053	-0.452232	-0.401497	-0.707	-1.46682	0.0354415	-0.634968	-1.32983	12.5111	10.0333	13.6667	13.8333	10.2042	8.01288	11.2262	11.3736	6.68389	5	140.376	167.497	0.838084	-0.837005	1.73
1924	-1.13	-0.455	1.6			9.18738	0.147516	0.528965	0.956258	0.408323	-0.523225	0.34258	0.66908	14.1667	12.2667	15.3	14.9333	11.6684	9.98804	12.6707	12.3464	8.51597	6	156.903	159.826	0.981714	-0.0822872	-1.13
1925	2.39	1.0425	2.4			8.70084	0.193105	0.19284	0.979911	0.173453	-0.521916	0.206072	0.389946	15.4889	13.4	16.5	16.5667	12.8378	10.9904	13.732	13.791	9.01304	7	150.712	152.367	0.989135	-0.0432941	2.39
1926	0.11	1.0975	-0.2			7.91285	-0.0351125	-0.351537	-0.159857	0.203539	-0.013853	-0.0804271	-0.195891	15.2111	13.1667	16.0667	16.4	12.5921	10.784	13.3488	13.6436	8.51347	8	129.69	145.169	0.893377	-0.54646	0.11
1927	1.72	1.48	-0.1			8.17143	0.0556869	-0.172895	0.266132	-0.0917761	-0.0674842	-0.0165059	-0.0651841	15	13.1	16.2667	15.6333	12.4054	10.725	13.5256	12.9655	8.50232	9	137.599	138.277	0.995098	-0.0119594	1.72
1928	0.63	1.34	-1.9			7.58143	-0.573898	-0.580498	-0.934457	-0.554245	-0.281551	-0.587688	-1.23314	12.2778	10.1333	12.9667	13.7333	9.99787	8.10132	10.6071	11.2852	6.76968	10	100.081	131.731	0.759742	-1.24866	0.63
1929	-1.03	-0.3125	-0.4			7.68851	-1.11878	-0.506518	-1.22205	-0.209464	-1.23516	-0.793297	-1.65358	12.9444	10.4667	14.1667	14.2	10.5875	8.39612	11.6684	11.6979	7.24473	11	99.7925	125.564	0.794754	-1.06468	-1.03
1930	0.91	0.095	1.4			8.52462	-0.206115	0.0711008	0.0359736	-0.0315217	-0.419411	-0.0859646	-0.207214	15.6889	14.4333	16.4667	16.1667	13.0147	11.9042	13.7025	13.4372	9.61151	12	134.425	119.795	1.12213	0.655516	0.91
1931	-0.16	-0.2125	-1.1			7.95215	-0.574458	-0.324389	-0.64975	-0.318577	-0.603845	-0.47414	-1.00096	13.5	11.1333	14.7	14.6667	11.0788	8.98572	12.1401	12.1106	7.25907	13	100.8	114.43	0.880881	-0.612125	-0.16
1932	-0.5	-0.4325	0.8			8.23921	0.134702	-0.126074	0.499994	-0.139145	0.0321881	0.0667408	0.10504	14.7222	12.1	15.5	16.5667	12.1597	9.84064	12.8476	13.791	7.9516	14	84.8776	109.477	0.775299	-1.16691	-0.5
1933	0.25	0.2	3.1			9.25646	0.605046	0.576692	1.27984	0.869607	-0.140869	0.646317	1.29017	15.7111	14.1	16.5	16.5333	13.0343	11.6094	13.732	13.7615	9.70638	15	65.6173	104.937	0.6253	-1.9551	0.25
1934	0.86	0.91	0.2			9.54177	0.608992	0.773796	1.20773	1.11635	-0.194578	0.725822	1.45274	15.2889	13.6667	15.8	16.4	12.6609	11.2262	13.1129	13.6436	9.81629	16	81.2449	100.796	0.806036	-1.0054	0.86
1935	0.97	0.7525	3.2			8.81661	0.135802	0.272821	-0.112456	0.844261	-0.0856146	0.229753	0.438369	14.6667	11.7667	15.9	16.3333	12.1106	9.54584	13.2014	13.5846	7.7098	17	84.1835	97.0174	0.867716	-0.681303	0.97
1936	-3.89	-1.125	1.8			9.45133	0.329773	0.711313	0.800997	0.309214	0.144214	0.491434	0.97346	15.9667	13.6	17.5333	16.7667	13.2603	11.1672	14.6459	13.9678	9.26747	18	102.401	93.554	1.09457	0.510724	-3.89
1937	0.72	0.4325	0.4			10.4249	1.01181	1.38393	1.55639	0.399216	0.937196	1.06918	2.15485	16.4889	14.9333	17.5333	17	13.7222	12.3464	14.6459	14.1742	10.2725	19	105.566	90.3504	1.16841	0.898721	0.72
1938	1.79	1.635	2.3			8.84626	0.816806	0.293305	0.324892	1.3371	0.879244	0.708635	1.4176	15.4	13.2333	16.6	16.3667	12.7592	10.843	13.8204	13.6141	9.12378	20	101.276	87.3555	1.15936	0.85115	1.79
1939	0.37	0.7775	0.1			8.69179	0.648945	0.186594	0.776915	0.929889	0.320676	0.553518	1.10041	15.8111	12.8333	17.1333	17.4667	13.1227	10.4892	14.2921	14.5869	8.56475	21	117.823	84.5267	1.39392	2.08368	0.37
1940	-2.86	-1.095	1.5			8.21099	0.0972109	-0.145568	-0.206884	-0.0300297	0.39297	0.00262221	-0.0260706	14.8556	12.4	16.2	15.9667	12.2777	10.106	13.4667	13.2603	8.54825	22	83.7894	81.8324	1.02391	0.139457	-2.86
1941	-2.31	-1.4275	1			8.67269	0.340394	0.173392	0.481475	-0.453204	0.460174	0.165459	0.306901	15.1556	12.4667	16.7333	16.2667	12.543	10.1649	13.9384	13.5256	8.27152	23	87.5507	79.2562	1.10465	0.563712	-2.31
1942	-0.55	-1	0.5			8.79501	0.046069	0.257903	0.156237	-0.649273	0.103564	-0.0328924	-0.0986912	13.8778	11.5667	14.8667	15.2	11.4129	9.36896	12.2875	12.5823	7.70989	24	74.2213	76.7868	0.966589	-0.161765	-0.55
1943	1.48	0.8625	-0.2			8.6367	-0.0550148	0.148535	-0.108531	-0.448288	0.0786804	-0.082401	-0.199927	14.8778	12.5333	15.9667	16.1333	12.2973	10.2239	13.2603	13.4077	8.64108	25	75.2976	74.4163	1.01184	0.0760269	1.48
1944	0.61	0.5475	-0.7			8.78277	0.10478	0.249446	-0.308503	-0.536738	0.816428	0.0551582	0.0813558	15.1556	11.7333	16.6667	17.0667	12.543	9.51636	13.8794	14.2332	7.98563	26	77.3508	72.1367	1.07228	0.393604	0.61
1945	1.64	1.24	1			8.86491	0.595026	0.306187	0.359072	-0.286311	1.16528	0.386057	0.757982	15.6111	13.5333	16.3	17	12.9459	11.1083	13.5551	14.1742	8.85047	27	106.21	69.9407	1.51858	2.73871	1.64
1946	0.27	0.5575	3.5			9.05998	0.917083	0.440953	0.569165	0.0892903	1.55109	0.662625	1.32351	14.7667	12.7	15.6667	15.9333	12.199	10.3713	12.995	13.2308	8.84662	28	68.2794	67.8267	1.00668	0.0488731	0.27
1947	-2.71	-1.255	0.2			9.66648	0.615135	0.85995	1.20233	-0.28626	0.399752	0.543942	1.08083	16.2778	14.1667	17.2	17.4667	13.5355	11.6684	14.3511	14.5869	9.87012	29	71.8436	65.809	1.0917	0.495639	-2.71	1947
1948	1.34	1.395	-0.6			8.45697	0.249162	0.0243641	0.122025	-0.306897	0.504355	0.0859618	0.144344	14.4889	11.7	15.3667	16.4	11.9534	9.48688	12.7297	13.6436	7.99831	30	59.0048	63.9062	0.923302	-0.389216	1.34	1948
1949	1.87	1.3375	-1.9			7.75219	-0.185124	-0.462531	-0.364232	-0.146899	-0.100763	-0.268606	-0.580682	14.1556	11.4333	14.9333	16.1	11.6586	9.25104	12.3464	13.3782	8.29351	31	52.8112	62.1391	0.849887	-0.774987	1.87	1949
1950	1.4	1.29	0.7	-0.41	-0.126667	8.23416	-0.260764	-0.129564	0.074997	-0.513579	-0.377326	-0.236368	-0.514761	15.0333	12.8	15.7333	16.5667	12.4349	10.4597	13.054	13.791	8.77228	32	58.1093	60.5261	0.96007	-0.196016	1.4	1950
1951	-1.26	0.0575	-0.5	-1.615	0.335	7.89132	-0.337303	-0.366412	-0.447649	0.13939	-0.486455	-0.290282	-0.625004	14.2667	11.3333	15.9333	15.5333	11.7568	9.1626	13.2308	12.8771	7.8531	33	27.5367	59.0809	0.466085	-2.79171	-1.26	1951
1952	0.83	-0.035	0	-0.9075	-0.5875	7.97831	-0.333223	-0.306312	-0.366024	-0.167451	-0.376208	-0.303999	-0.653054	13.3556	10.8667	14.6333	14.5667	10.9511	8.74988	12.0811	12.0222	7.08955	34	46.7032	57.8121	0.807845	-0.9959	0.83	1952
1953	0.18	0.35	2.8	-1.59	-0.2525	8.37517	-0.167802	-0.032148	0.196151	-0.36015	-0.336896	-0.133261	-0.303926	15.6111	14.0333	16.2333	16.5667	12.9459	11.5505	13.4962	13.791	9.55719	35	69.8913	56.7138	1.23235	1.2347	0.18	1953
1954	0.13	0.195	2	-1.255	0.9525	7.94704	-0.0807932	-0.327918	-0.299898	-0.341988	0.0820403	-0.221941	-0.485261	14.1	12.3667	14.9333	15	11.6094	10.0765	12.3464	12.4054	8.45785	36	47.301	55.7737	0.848087	-0.784441	0.13	1954
1955	-2.54	-1.4425	1.2	-0.795	0.155	8.02309	0.175463	-0.275382	-0.256008	0.36063	0.255927	0.0212919	0.0121054	15.3333	12.3	16.6333	17.0667	12.7002	10.0175	13.8499	14.2332	8.33009	37	52.5812	54.9829	0.95632	-0.215722	-2.54	1955
1956	-1.73	-1.0875	-0.5	-1.23	0.1775	7.76011	-0.352567	-0.457057	-0.764814	-0.493864	0.0270944	-0.42216	-0.894672	13.2556	11.3	13.9	14.5667	10.8626	9.13312	11.4326	12.0222	7.76382	38	55.9704	54.33	1.03019	0.172453	-1.73	1956
1957	1.52	1.05	-2.2	-0.27	0.4525	7.54284	-0.343629	-0.607155	-0.838866	-0.604032	0.132214	-0.47946	-1.01184	13.9667	11.3667	14.7667	15.7667	11.4915	9.19208	12.199	13.0834	7.49729	39	64.6181	53.8021	1.20103	1.07014	1.52	1957
1958	-1.02	-0.24	-2.4	-0.965	-0.185	7.73823	-0.458053	-0.472173	-0.418206	-0.863522	-0.222973	-0.494219	-1.04202	13.6444	11.6333	14.0333	15.2667	11.2065	9.42792	11.5505	12.6412	8.12334	40	43.8115	53.3877	0.82063	-0.92872	-1.02	1958
1959	-0.37	0.8125	1.5	0.2775	-0.14	8.42957	-0.014826	0.00543356	-0.136069	0.0864066	-0.0299905	-0.0185549	-0.0693737	15.7111	12.6	17.0667	17.4667	13.0343	10.2828	14.2332	14.5869	8.60051	41	39.7181	53.079	0.748283	-1.30887	-0.37	1959
1960	-1.54	-0.52	-0.6	0.3375	0.9525	9.19603	-0.048912	0.534944	0.390251	0.0216438	-0.356949	0.147472	0.270121	14.8	13.1333	15.6	15.6667	12.2285	10.7545	12.936	12.995	8.92116	42	56.9234	52.864	1.07679	0.417295	-1.54	1960
1961	1.8	1.825	2.7	-0.6525	-0.005	8.35349	-0.187579	-0.047124	-0.114205	0.323662	-0.531011	-0.0921694	-0.219902	14.2667	12.4667	15.2	15.1333	11.7568	10.1649	12.5823	12.5233	8.84556	43	54.4969	52.7245	1.03362	0.190435	1.8	1961
1962	-2.38	0.12	-0.9	-0.49	-0.46	7.6216	-0.460838	-0.552745	-0.821215	0.47262	-0.694581	-0.39898	-0.847273	12.6	10.3667	13.6	13.8333	10.2828	8.30768	11.1672	11.3736	7.00615	44	59.9315	52.643	1.13845	0.741298	-2.38	1962
1963	-3.6	-0.8325	-1.9	-0.965	-0.4675	8.68559	-0.486421	0.182309	-0.0131479	-0.575288	-0.676613	-0.270685	-0.584933	14.5444	12.0667	15.6333	15.9333	12.0025	9.81116	12.9655	13.2308	8.7535	45	60.1928	52.6038	1.14427	0.771869	-3.6	1963
1964	-2.86	-0.09	-0.8	-0.065	-0.115	7.60762	-0.664783	-0.562405	-0.865126	0.00232344	-0.840821	-0.566507	-1.18983	13.3778	10.4333	14.6	15.1	10.9707	8.36664	12.0516	12.4938	7.14644	46	61.5702	52.595	1.17065	0.910476	-2.86	1964
1965	-2.88	-0.6375	0.5	-1.56	0.23	8.29555	-0.407614	-0.0871534	-0.22562	0.302595	-0.768274	-0.194613	-0.42938	13.1667	11.2333	14.0333	14.2333	10.784	9.07416	11.5505	11.7274	7.9729	47	52.5778	52.6098	0.999393	0.0106091	-2.88	1965
1966	-1.69	-0.1425	-0.6	-0.0725	0.1675	8.34946	-0.290942	-0.0499043	-0.0957857	-0.167348	-0.39312	-0.176539	-0.392423	15.0556	12.8333	16.4	15.9333	12.4545	10.4892	13.6436	13.2308	8.36984	48	63.2804	52.6456	1.20201	1.07526	-1.69	1966
1967	1.28	1.13	1.1	-1.1175	0.8125	8.29075	-0.0768314	-0.0904679	-0.111844	-0.147213	-0.0529848	-0.100627	-0.237197	14.5222	11.8667	15.7	16	11.9829	9.63428	13.0245	13.2898	8.28732	49	53.1061	52.7021	1.00767	0.0540756	1.28	1967											1967	1	222.936	259.643	0.858624	-0.761514
1968	-1.04	0.255	-2.1	-1.935	-1.0225	8.34583	0.0941743	-0.0524117	-0.0586513	0.0720885	0.244018	0.051261	0.0733868	14.7889	11.8333	16.2	16.3333	12.2187	9.6048	13.4667	13.5846	7.6486	50	55.7518	52.7832	1.05624	0.309328	-1.04	1968											1968	2	287.845	253.086	1.13734	0.54603	-8.82368	-10.292	-1.88837	-13.17
1969	-4.89	-1.8075	0.3	-0.5875	1.12	8.48598	0.355887	0.0444102	0.0643342	0.315922	0.571746	0.249103	0.477937	16.1111	14.0667	17.2	17.0667	13.3881	11.58	14.3511	14.2332	9.31549	51	61.1572	52.8944	1.15621	0.83463	-4.89	1969											1969	3	327.325	246.496	1.32791	1.44004	-9.30553	-10.3804	-1.28671	-12.8494
1970	-1.89	-0.57	-0.1	-0.6075	0.675	8.03116	0.00247691	-0.269802	-0.134687	-0.697094	0.331356	-0.192557	-0.425175	15.2111	13.6333	16.0333	15.9667	12.5921	11.1967	13.3193	13.2603	9.1611	52	42.0572	53.0434	0.792882	-1.07452	-1.89	1970											1970	4	291.75	239.88	1.21623	0.916126	-9.4842	-10.0096	-1.59907	-12.5407
1971	-0.96	-0.2	-0.9	-0.755	0.24	7.83867	0.165607	-0.402781	-0.584254	0.470964	0.475455	-0.0101539	-0.0521953	14.2889	11.6	15.5	15.7667	11.7765	9.39844	12.8476	13.0834	7.76828	53	40.2255	53.2405	0.755543	-1.27072	-0.96	1971											1971	5	152.701	233.314	0.654486	-1.71917	-10.8284	-9.77081	1.4204	-12.5783
1972	0.34	-0.2525	1.6	-1.0825	1.255	8.84026	0.356093	0.28916	0.288868	0.150943	0.417664	0.286659	0.554731	15.6333	13.5667	16.8	16.5333	12.9655	11.1378	13.9973	13.7615	9.1086	54	53.2308	53.491	0.995136	-0.0117612	0.34	1972	1	451.9	401.837	1.12459	0.63898	-8.5078	-9.81402	0.535874			1972	6	229.046	226.913	1.0094	-0.054205	-10.8639	-9.99938	0.695793	-12.5297
1973	2.52	0.8975	1.7	0.0475	0.365	8.2121	0.210885	-0.144804	-0.12808	0.135624	0.443895	0.0766587	0.12532	15.5	13.2	16.9	16.4	12.8476	10.8135	14.0858	13.6436	8.43	55	54.719	53.7933	1.01721	0.104216	2.52	1973	2	346.296	423.619	0.817471	-1.08648	-8.65353	-9.81574	0.307078	-12.5401	-12.4001	1973	7	178.813	220.743	0.81005	-0.989385	-10.8631	-9.79787	-0.0551002	-12.5223
1974	1.23	0.8825	-0.1	-0.68	0.4825	8.43295	0.124286	0.00776873	0.0435828	0.059146	0.247695	0.089548	0.151677	14.0556	12.3333	14.9	14.9333	11.5701	10.047	12.317	12.3464	8.73191	56	48.5075	54.145	0.895881	-0.533302	1.23	1974	3	436.317	445.926	0.978454	-0.182034	-8.83138	-10.1242	0.164363	-12.7067	-12.6577	1974	8	182.209	214.851	0.848071	-0.811022	-11.6391	-9.83525	1.30785	-12.4177
1975	1.63	0.54	-0.9	-0.415	0.37	8.23142	0.390043	-0.131453	-0.0590387	0.804499	0.453372	0.266845	0.514216	15.0444	11.2667	16.8333	17.0333	12.4447	9.10364	14.0268	14.2037	7.89618	57	39.108	54.5432	0.71701	-1.4732	1.63	1975	4	487.92	468.532	1.04138	0.171511	-8.64828	-9.59755	-0.993628	-12.3389	-12.1775	1975	9	183.962	209.249	0.879155	-0.665197	-11.0683	-9.46307	-0.803141	-12.2044
1976	1.37	0.99	-2.1	-2.005	-0.2525	8.08897	0.114343	-0.229867	-0.198903	0.246989	0.244085	0.0155759	0.000417325	14.6333	12.1333	15.6	16.1667	12.0811	9.87012	12.936	13.4372	7.84628	58	44.8078	54.9811	0.814968	-0.958469	1.37	1976	5	356.617	490.985	0.72633	-1.59855	-9.26129	-9.65502	-0.0318215	-12.4748	-12.2677	1976	10	203.441	203.914	0.997677	-0.109181	-11.9254	-9.25979	0.814043	-12.0795
1977	-2.14	-0.205	-1	0.69	0.81	8.14383	0.0776136	-0.191964	-0.0685259	-0.0937924	0.289731	-0.0161377	-0.0644311	13.7556	11.3333	14.2333	15.7	11.3048	9.1626	11.7274	13.0245	7.56895	59	42.3062	55.444	0.763044	-1.23131	-2.14	1977	6	397.611	512.676	0.775559	-1.32196	-8.95105	-9.98518	-1.56729	-12.822	-12.5853	1977	11	160.804	198.803	0.808863	-0.994955	-11.9965	-9.77274	0.477146	-12.6096
1978	0.17	0.34	-1.4	0.3775	0.415	9.06197	0.246508	0.442331	0.528977	0.604058	-0.0245093	0.387714	0.761371	13.9111	12.0333	14.8333	14.8667	11.4424	9.78168	12.258	12.2875	8.0067	60	43.3756	55.91	0.77581	-1.16423	0.17	1978	7	633.106	531.506	1.19116	1.013	-9.54795	-10.1102	-0.80752	-12.8782	-12.4988	1978	12	177.159	193.858	0.913864	-0.502369	-11.722	-10.1863	-0.64046	-12.9543
1979	-2.25	-0.7725	0.6	0.215	0.31	9.27378	-0.00587401	0.588655	0.670356	-0.0299421	-0.384332	0.211184	0.4004	14.4	12.6667	15.4333	15.1	11.8748	10.3418	12.7886	12.4938	8.39564	61	60.0774	56.3497	1.06615	0.361405	-2.25	1979	8	722.347	544.212	1.32733	1.77805	-10.9477	-10.3004	1.80632	-12.9987	-12.6401	1979	13	213.527	188.992	1.12982	0.51071	-13.0919	-10.3518	2.28323	-13.0501
1980	0.56	-0.3975	-1.1	-0.0225	0.72	8.91786	0.200346	0.342771	0.549672	0.514995	-0.0869358	0.330126	0.643613	15.3111	13.9667	15.9	16.0667	12.6805	11.4915	13.2014	13.3488	9.53634	62	75.2219	56.7271	1.32603	1.72696	0.56	1980	9	689.705	548.641	1.25712	1.38358	-10.8394	-9.83094	0.728881	-12.2783	-12.2527	1980	14	257.203	184.108	1.39703	1.76427	-12.516	-10.0933	0.559365	-12.5407
1981	2.05	0.42	-0.1	-0.795	-0.635	8.22242	-0.122132	-0.13767	-0.0502755	-0.209484	-0.116404	-0.128458	-0.294106	13.7444	11.3667	14.8333	15.0333	11.295	9.19208	12.258	12.4349	7.93669	63	63.0073	57.0087	1.10522	0.566699	2.05	1981	10	492.517	544.885	0.903892	-0.600943	-9.86322	-9.58037	-2.25088	-12.3331	-12.1623	1981	15	197.324	179.13	1.10157	0.378204	-11.7906	-9.60854	-1.43292	-12.3613
1982	0.8	0.775	-0.8	-0.05	0.0525	7.9685	-0.32377	-0.31309	-0.827093	0.145017	-0.200828	-0.298999	-0.642829	14.3222	11.4667	15.4667	16.0333	11.806	9.28052	12.8181	13.3193	7.74107	64	57.9169	57.1695	1.01307	0.0824919	0.8	1982	11	518.042	534.663	0.968912	-0.235643	-10.846	-9.64386	-0.751609	-12.4358	-12.2843	1982	16	147.65	174.045	0.848346	-0.809732	-12.3056	-9.49865	-0.448047	-12.2906
1983	3.42	1.5075	0.9	-0.54	-0.415	8.42547	-0.359807	0.00260543	-0.260359	-0.377844	-0.422938	-0.264634	-0.57256	14.7667	11.4667	16.3667	16.4667	12.199	9.28052	13.6141	13.7025	8.03649	65	68.8808	57.1891	1.20444	1.08804	3.42	1983	12	476.996	519.495	0.918192	-0.520603	-11.6799	-9.52022	0.361639	-12.2515	-12.0554	1983	17	187.692	168.857	1.11154	0.424984	-12.8006	-9.55201	0.515448	-12.2833
1984	1.6	0.62	-0.3	-0.4	0.11	7.94633	-0.253926	-0.328407	-0.622438	0.480454	-0.271258	-0.185412	-0.410566	14.2556	11.8667	15.2	15.7	11.747	9.63428	12.5823	13.0245	8.2212	66	64.1272	57.049	1.12407	0.665749	1.6	1984	13	539.151	500.518	1.07719	0.372673	-12.0374	-9.63603	0.48267	-12.3432	-12.2816	1984	18	176.381	163.562	1.07837	0.269389	-12.9677	-9.69605	0.748893	-12.4032
1985	-0.63	-0.695	-0.3	-0.665	1.03	8.49911	-0.21577	0.0534818	-0.14363	-0.18747	-0.221663	-0.12482	-0.286667	14.2778	12.2	15.5333	15.1	11.7667	9.92908	12.8771	12.4938	8.13494	67	83.6038	56.7365	1.47355	2.50209	-0.63	1985	14	477.719	478.523	0.99832	-0.0704182	-12.3157	-9.99767	0.529548	-12.7201	-12.5159	1985	19	161.818	158.164	1.02311	0.0101073	-12.8022	-9.84619	0.25121	-12.5686
1986	0.5	-0.0425	-1.2	-0.23	0.5775	8.18164	-0.542907	-0.165845	-0.192776	-0.325027	-0.808765	-0.373103	-0.79436	14.4222	12.2667	15.4333	15.5667	11.8944	9.98804	12.7886	12.9066	8.21031	68	72.4093	56.2457	1.28738	1.52384	0.5	1986	15	378.176	454.561	0.831959	-1.00509	-12.8489	-9.74074	1.19892	-12.4837	-12.3321	1986	20	132.592	152.68	0.86843	-0.715512	-12.7623	-9.8507	0.0777303	-12.5936
1987	-0.75	-0.3775	-2.3	0.11	0.295	7.43635	-0.25674	-0.680725	-0.407981	-1.2647	-0.0513979	-0.601201	-1.26078	12.6444	10.7	13.5	13.7333	10.3221	8.60248	11.0788	11.2852	7.36486	69	47.6417	55.5843	0.857107	-0.737047	-0.75	1987	16	320.807	429.588	0.74678	-1.48365	-12.6359	-9.8123	0.485757	-12.6816	-12.5754	1987	21	94.2062	147.129	0.640298	-1.78573	-12.8019	-10.3252	0.11404	-13.1946
1988	0.72	0.1725	1.4	0.3775	0.1075	9.93929	0.760998	1.04842	1.23245	-0.120829	0.717029	0.719267	1.43934	15.4667	13.4667	16.3667	16.5667	12.8181	11.0493	13.6141	13.791	9.31776	70	55.2926	54.7685	1.00957	0.0640828	0.72	1988	17	478.515	403.582	1.18567	0.982176	-12.1658	-10.0171	-0.628964	-12.4987	-12.2035	1988	22	192.203	141.507	1.35826	1.58239	-12.6022	-9.72457	-0.376477	-12.2062
1989	5.08	2.3175	0.3	-0.22	-1.0125	8.81445	0.32131	0.271329	0.330895		0.31776	0.306661	0.595633	13.9333	12		15.8667	11.462	9.7522		13.1719	8.31974	71	47.5279	53.813	0.883204	-0.599918	5.08	1989	18	413.993	375.493	1.10253	0.515093	-12.4113	-9.36136	-0.270938	-12.0386	-11.8069	1989	23	115.589	135.779	0.851303	-0.79586	-12.4037	-9.28194	-0.847706	-11.9592
1990	3.96	3.0725	1	1.1175	-1.2675	9.02324	0.822533	0.41557	0.918476		0.766096	0.700047	1.40003	14.6333	12.9		16.3667	12.0811	10.5482		13.6141	8.87587	72	58.9564	52.7314	1.11805	0.634111	3.96	1990	19	336.656	344.811	0.976349	-0.19386	-12.1865	-9.15185	-0.803764	-11.7034	-11.5493	1990	24	161.62	129.933	1.24386	1.04574	-12.724	-9.2166	-0.120415	-11.7681
1991	1.03	0.4275	-0.3	0.2475	0.6225	9.60641	0.882471	0.818449	0.885066		0.880944	0.861486	1.73015	14.3167	12.8		15.8333	11.8011	10.4597		13.1424	8.39113	73	54.6155	51.535	1.05977	0.327887	1.03	1991	20	404.419	311.547	1.2981	1.61385	-12.7406	-9.40408	1.61976	-12.0726	-11.6672	1991	25	168.332	123.957	1.35799	1.58115	-13.0381	-9.4058	0.601352	-12.0743
1992	3.28	1.455	1	-0.5275	0.0925	8.75146	0.250006	0.227812	-0.0359373		0.418208	0.203361	0.384403	14.6333	11.7333		17.5333	12.0811	9.51636		14.6459	8.00008	74	46.185	50.2377	0.919329	-0.410094	3.28	1992	21	270.604	275.943	0.980651	-0.169687	-12.618	-9.24908	-0.114401	-12.0497	-11.7092	1992	26	126.48	117.863	1.07311	0.244695	-12.6107	-9.58273	-0.368086	-12.3834
1993	2.67	1.65	-0.4	-0.3175	-0.3775	7.29232	-1.55666	-0.780225	-1.01232		-1.94548	-1.24601	-2.57929	12.7333	10.9333		14.5333	10.4008	8.80884		11.9927	7.25688	75	49.0274	48.8549	1.00353	0.0323556	2.67	1993	22	151.21									1993	27	47.5503
1994	3.03	1.2875	1.2	0.49	0.0625	9.87098	1.69764	1.00123	1.69764			1.34944	2.72791	14.8667	12.5333		17.2	12.2875	10.2239		14.3511	8.31003	76	49.9751	47.4004	1.05432	0.29922	3.03
1995	3.96	1.85	-2.1	-0.0925	-0.285	10.6042	2.08669	1.50776	2.08669			1.79723	3.64356	14.4833	11.9667		17	11.9485	9.72272		14.1742	8.1473	77	37.5921	45.888	0.819214	-0.93616	3.96
1996	-3.78	-1.6425	1.2	-0.4325	0.975	7.29272	-0.184474	-0.779952	-0.184474			-0.482213	-1.01747	14.3	12.8333		15.7667	11.7863	10.4892		13.0834	8.74093	78	42.9094	44.332	0.967911	-0.154817	-3.78
1997	-0.2	1.0975	-0.9	-0.08	-0.58	6.7053	-1.4149	-1.18577	-1.4149			-1.30033	-2.69037										79	53.2226	42.7431	1.24517	1.30209	-0.2
1998	0.72	0.805	0.3	0.925	0.1475	8.61648		0.134564															80	28.5572	41.1316	0.694288	-1.59259	0.72
1999	1.7	0.5575	-1.3	-0.8125	-0.2475	6.79321		-1.12504															81	26.7466	39.511	0.67694	-1.68375	1.7
			-1.4	-0.445	-0.86
			-0.6	1	0.4475
			2.1	0.7125	-0.505
			-1	0.65	0.41
			-1.8	0.1475	-0.0525
			-0.1	-0.9925	-0.045
			-0.5	-0.88	0.6275
			-2.5	1.1	-0.325
			0.9	0.04	-0.27
			-1.9	-0.5925	0.115
			-0.3	0.9475	0.6825
			-1.1	-0.54	-0.08
			-2.8	-1.005	0.2425
			1.8	0.365	0.6275
			-1.2	1.43	0.4125
			-0.9	0.42	-0.14
			0.1	1.6775	-0.3425
			1.8	0.3325	-0.34
				-0.4875	-0.105
				0.1475	-0.0175
																																							D	-16.3
																																							J	-17.2
																																							F	-16.8
																																							M	-15.5
																																							A	-13.3
																																							M	-10.7
																																							J	-9.4
																																							J	-9.1
																																							A	-9.7
																																							S	-10.6
																																							O	-13
																																							N	-15
[truncated: 135 more columns]

## Sheet: tree d18O
Kiruna tree d18O detrending					Görjean d18Ow reco detrending					NAO
1	21.495	20.2511	1.06142	1.63531	1	-13.4429	-13.4021	1.00305	0.168625	-0.33
2	18.92	20.2904	0.93246	-1.79103	2	-13.7891	-13.4093	1.02832	1.55234	-1.41
3	20.1325	20.3298	0.990296	-0.254414	3	-13.0849	-13.4165	0.975284	-1.35112	3.89
4	20.9225	20.3692	1.02716	0.725116	4	-13.3518	-13.4238	0.994636	-0.291752	0.23
5	19.98	20.4086	0.978998	-0.554595	5	-13.3748	-13.4312	0.9958	-0.22803	1.98
6	19.675	20.4481	0.962191	-1.00112	6	-13.1671	-13.4387	0.979786	-1.10464	2.06
7	19.5825	20.4876	0.95582	-1.17038	7	-13.3925	-13.4463	0.995998	-0.217229	2.06
8	20.685	20.5271	1.00769	0.207707	8	-13.5423	-13.454	1.00657	0.361291	1.44
9	19.455	20.5666	0.945953	-1.43255	9	-13.5899	-13.4616	1.00953	0.5236	0
10	20.1275	20.6058	0.976788	-0.613314	10	-13.5298	-13.4691	1.0045	0.248344	2.1
11	20.175	20.6447	0.977246	-0.601133	11	-13.6161	-13.4765	1.01036	0.569139	0.29
12	20.35	20.6832	0.983889	-0.424652	12	-13.3406	-13.4837	0.989385	-0.579203	0.24
13	20.535	20.7211	0.991019	-0.235213	13	-13.575	-13.4907	1.00624	0.34358	2.69
14	20.9975	20.7582	1.01153	0.30974	14	-13.3408	-13.4976	0.98838	-0.634207	1.48
15	20.18	20.7942	0.970463	-0.78136	15	-13.5516	-13.5043	1.0035	0.193672	-0.2
16	20.935	20.8291	1.00509	0.138518	16	-13.7819	-13.5107	1.02007	1.10044	-0.69
17	21.8425	20.8625	1.04697	1.25138	17	-13.8332	-13.517	1.0234	1.28262	-3.8
18	22.855	20.8944	1.09383	2.4964	18	-13.5631	-13.523	1.00297	0.164244	-0.8
19	21.8275	20.9245	1.04315	1.14994	19	-13.1452	-13.5288	0.971641	-1.55049	-0.8
20	22.16	20.9528	1.05762	1.53415	20	-13.2862	-13.5347	0.981639	-1.00324	3.18
21	21.7225	20.9792	1.03543	0.944709	21	-13.2307	-13.5405	0.977119	-1.25063	1.63
22	20.785	21.0038	0.989583	-0.27335	22	-13.4154	-13.5463	0.99034	-0.526938	1.85
23	20.4825	21.0266	0.974125	-0.684063	23	-13.9171	-13.5519	1.02695	1.47704	1.73
24	20.35	21.0476	0.966856	-0.877182	24	-13.6255	-13.5574	1.00503	0.27696	-1.13
25	21.545	21.0669	1.02269	0.606337	25	-13.108	-13.5625	0.966492	-1.83238	2.39
26	21.84	21.0845	1.03583	0.955403	26	-13.7483	-13.5673	1.01334	0.732145	0.11
27	20.9025	21.1004	0.990622	-0.245745	27	-13.6377	-13.5716	1.00487	0.268466	1.72
28	19.2525	21.1146	0.911811	-2.33963	28	-14.0159	-13.5754	1.03245	1.77833	0.63
29	22.205	21.1271	1.05102	1.35887	29	-14.245	-13.5785	1.04908	2.68855	-1.03
30	21.965	21.138	1.03912	1.04283	30	-13.6139	-13.5812	1.00241	0.133979	0.91
31	20.51	21.1472	0.969866	-0.797205	31	-13.9147	-13.5833	1.02439	1.33714	-0.16
32	20.3475	21.1548	0.961837	-1.01053	32	-13.5972	-13.5853	1.00088	0.0498286	-0.5
33	21.1425	21.1608	0.999136	-0.019565	33	-13.0665	-13.5872	0.961678	-2.09588	0.25
34	21.6075	21.1651	1.0209	0.558737	34	-13.2878	-13.5894	0.97781	-1.2128	0.86
35	21.3	21.1677	1.00625	0.169398	35	-13.7856	-13.5919	1.01425	0.781951	0.97
36	19.6825	21.1687	0.929792	-1.86191	36	-13.7218	-13.5949	1.00934	0.513031	-3.89
37	22.3675	21.168	1.05667	1.50893	37	-13.0971	-13.5984	0.963136	-2.01606	0.72
38	20.965	21.1655	0.990526	-0.24831	38	-13.2261	-13.6027	0.972317	-1.51352	1.79
39	21.3575	21.1613	1.00927	0.24973	39	-13.4092	-13.6076	0.985418	-0.796341	0.37
40	21.605	21.1553	1.02126	0.568163	40	-14.0818	-13.6132	1.03442	1.88596	-2.86
41	22.2325	21.1475	1.05131	1.36651	41	-13.7101	-13.6195	1.00666	0.366265	-2.31
42	20.9325	21.1379	0.990281	-0.254826	42	-13.6844	-13.6263	1.00426	0.235313	-0.55
43	20.9175	21.1267	0.9901	-0.259623	43	-13.5489	-13.6338	0.993778	-0.338717	1.48
44	20.9775	21.1137	0.99355	-0.167955	44	-13.505	-13.6419	0.989964	-0.547532	0.61
45	21.41	21.0991	1.01474	0.394945	45	-13.4759	-13.6507	0.987192	-0.699246	1.64
46	21.3725	21.0828	1.01374	0.368434	46	-13.4493	-13.6602	0.984561	-0.84327	0.27
47	22.3	21.0651	1.05863	1.56098	47	-13.4115	-13.6704	0.981063	-1.03477	-2.71
48	21.8298	21.0458	1.03725	0.993157	48	-13.5226	-13.6811	0.988417	-0.632187	1.34
49	21.495	21.0251	1.02235	0.59716	49	-13.623	-13.6922	0.994945	-0.274838	1.87
50	20.9	21.0032	0.995085	-0.127192	50	-13.4095	-13.7035	0.97855	-1.17234	1.4
51	20.665	20.9803	0.984972	-0.39587	51	-14.0072	-13.7148	1.02132	1.16913	-1.26
52	20.505	20.9565	0.978457	-0.568949	52	-13.821	-13.7259	1.00693	0.381127	0.83
53	20.465	20.9319	0.977695	-0.589196	53	-13.5678	-13.7365	0.987721	-0.670297	0.18
54	20.6275	20.9067	0.986646	-0.351402	54	-13.8475	-13.7465	1.00735	0.404029	0.13
55	22.0025	20.881	1.05371	1.43033	55	-13.966	-13.7557	1.01529	0.83888	-2.54
56	20.3025	20.855	0.973509	-0.700423	56	-14.095	-13.7639	1.02406	1.31879	-1.73
57	20.765	20.8287	0.996943	-0.0778257	57	-13.8995	-13.7709	1.00934	0.513338	1.52
58	20.3475	20.8023	0.978138	-0.577433	58	-13.8698	-13.7766	1.00676	0.371976	-1.02
59	22.02	20.7759	1.05988	1.59438	59	-13.7378	-13.7811	0.996858	-0.170111	-0.37
60	20.9399	20.7496	1.00917	0.247068	60	-13.5965	-13.7843	0.986375	-0.743979	-1.54
61	19.5075	20.7236	0.941316	-1.55573	61	-13.5425	-13.7861	0.982333	-0.965241	1.8
62	20.425	20.6981	0.986806	-0.347142	62	-13.9691	-13.7865	1.01324	0.726882	-2.38
63	19.9625	20.6731	0.965627	-0.909837	63	-13.8841	-13.7853	1.00717	0.394332	-3.6
64	20.0325	20.6488	0.970155	-0.789534	64	-14.1114	-13.7825	1.02387	1.30826	-2.86
65	18.73	20.6252	0.908115	-2.43784	65	-13.9156	-13.778	1.00999	0.548476	-2.88
66	19.645	20.6023	0.953535	-1.23111	66	-13.81	-13.7718	1.00277	0.153749	-1.69
67	20.4125	20.5802	0.991854	-0.213034	67	-13.6996	-13.7639	0.995327	-0.253931	1.28
68	19.7875	20.5586	0.962491	-0.993161	68	-13.8128	-13.7544	1.00424	0.234088	-1.04
69	20.9525	20.5377	1.0202	0.540054	69	-14.0169	-13.7433	1.01991	1.09158	-4.89
70	21.2667	20.5171	1.03654	0.974172	70	-13.7687	-13.7307	1.00277	0.153459	-1.89
71	20.9525	20.4968	1.02223	0.594086	71	-13.8123	-13.7166	1.00698	0.383977	-0.96
72	21.73	20.4767	1.0612	1.6295	72	-13.487	-13.7012	0.984371	-0.853661	0.34
73	21.3341	20.4568	1.04288	1.14274	73	-13.5454	-13.6845	0.989831	-0.55481	2.52
74	20.525	20.4371	1.0043	0.117717	74	-13.5146	-13.6667	0.988868	-0.607528	1.23
75	21.33	20.4175	1.04469	1.1908	75	-13.5321	-13.6479	0.991516	-0.462549	1.63
76	21.335	20.3982	1.04593	1.22362	76	-13.6859	-13.628	1.00425	0.234425	1.37
77	19.55	20.3792	0.959314	-1.07757	77	-13.9578	-13.607	1.02578	1.41304	-2.14
78	20.6175	20.3606	1.01262	0.338659	78	-13.8288	-13.585	1.01795	0.984294	0.17
79	19.7375	20.3425	0.970258	-0.786798	79	-13.6233	-13.562	1.00452	0.249117	-2.25
80	20.1925	20.3251	0.993476	-0.169944	80	-13.4269	-13.5383	0.991772	-0.448514	0.56
81	19.565	20.3084	0.963395	-0.969141	81	-13.4915	-13.5138	0.998351	-0.0883773	2.05
82	19.355	20.2924	0.953803	-1.22397	82	-13.5782	-13.4888	1.00662	0.364364	0.8
83	19.605	20.2773	0.966845	-0.877475	83	-13.3444	-13.4634	0.991161	-0.481964	3.42
84	19.495	20.2629	0.962101	-1.0035	84	-13.5839	-13.4378	1.01088	0.59718	1.6
85	20.135	20.2493	0.994354	-0.146607	85	-13.4286	-13.4119	1.00124	0.0699187	-0.63
86	20.8925	20.2364	1.03242	0.864784	86	-13.3575	-13.3861	0.997862	-0.115155	0.5
87	20.345	20.2241	1.00598	0.162237	87	-13.4704	-13.3604	1.00824	0.452696	-0.75
88	19.4975	20.2123	0.964634	-0.936222	88	-12.918	-13.335	0.968727	-1.71003	0.72
89	21.025	20.2011	1.04079	1.08701	89	-13.1655	-13.31	0.989142	-0.592534	5.08
90	19.4975	20.1903	0.965688	-0.908219	90	-12.9199	-13.2856	0.972476	-1.50481	3.96
91	19.7575	20.1799	0.97907	-0.552664	91	-13.0173	-13.2617	0.981567	-1.00719	1.03
92	21.18	20.1698	1.05009	1.33412	92	-13.1779	-13.2384	0.995431	-0.248245	3.28
93	18.8425	20.1599	0.934652	-1.7328	93	-13.6303	-13.2155	1.03138	1.71974	2.67
94	21.0375	20.1503	1.04403	1.17324	94	-12.8525	-13.1931	0.974188	-1.41109	3.03
95	21.055	20.1407	1.0454	1.20949	95	-12.6392	-13.1709	0.959632	-2.20791	3.96
96	20.3525	20.1312	1.01099	0.295493	96	-13.6568	-13.1491	1.03862	2.11576	-3.78
97	20.3525	20.1217	1.01147	0.308188	97	-13.5153	-13.1273	1.02956	1.61983	-0.2

## Sheet: ED-NJB-A6R
-8.49886	1	-9.88244	50.4251			first sampled annual increment is incompletely sampled; ca. 200 µm missing																														-8.49886	1	-9.88244	22.38	-190.205	-221.169				-8.49886	1	-9.88244
-8.68463	2	-10.1791	100.85			last 2.5 annual increments unsampled (last is incomplete anyway, 1992 missing, parts of 1991 missing)												Proportion of time of the growing season contained in each sample of the year																		-8.68463	2	-10.1791	20.28	-176.124	-206.431				-8.68463	2	-10.1791
-8.63423	3	-9.87993	151.275			T during shell formation	reco d18O	Time										# Samples/yr	weights = %days growing season																	-8.63423	3	-9.87993	24.47	-211.28	-241.762				-8.63423	3	-9.87993
-8.31065	4	-9.49314	201.7	-9	73	6.78974	-12.4052	23May-8Jun					1973-05-31	-12.4052	1973-05-15				1st	2nd	3rd	4th	5	6	7	8	9	10	11	12	13	14	15	16		-8.31065	4	-9.49314	32.87	-273.171	-312.04				-8.31065	4	-9.49314	56.8641
-8.27374	1	-9.79757	252.125			9.66376	-12.0474	8Jun-23Jun					1973-06-15	-12.0474	1973-06-15			1	100																	-8.31065	4	-9.49314	11.59	-96.3205	-110.026				-8.27374	1	-9.79757	113.728
-8.27555	2	-9.84517	302.551			11.6674	-11.6334	23Jun-6Jul					1973-06-29	-11.6334	1973-07-15	-12.6		2	42.66	57.34																-8.27374	1	-9.79757	10.79	-89.2737	-105.716				-8.27555	2	-9.84517	170.592
-8.42719	3	-9.92691	352.976			14.0858	-11.1579	6Jul-22Jul					1973-07-14	-11.1579	1973-08-15	-10.2		3	27.97	31.47	40.56															-8.27555	2	-9.84517	9.09	-75.2247	-89.4926				-8.42719	3	-9.92691	227.456
-9.08792	4	-10.3605	403.401			11.4504	-12.1987	22Jul-9Aug					1973-07-31	-12.1987	1973-09-15			4	22.38	20.28	24.47	32.87														-8.42719	3	-9.92691	11.19	-94.3002	-111.082				-9.08792	4	-10.3605	284.32
-9.00304	5	-9.85094	453.826			8.69092	-12.325	9Aug-26Aug					1973-08-17	-12.325	1973-10-15	-11.8		5	18.18	15.39	18.88	20.27	27.28													-9.08792	4	-10.3605	12.58	-114.326	-130.335				-9.00304	5	-9.85094	341.185
-8.89403	6	-9.64248	504.251			4.40403	-13.1043	26Aug-16Sep					1973-09-05	-13.1043	1974-05-15	-13.4	-12.358	6	15.38	12.59	14.69	16.78	18.18	22.38												-9.00304	5	-9.85094	11.89	-107.046	-117.128				-8.89403	6	-9.64248	398.049
-8.70235	7	-9.68909	554.676	-9	74	0.751989	-13.9924	16Sep-12Oct		7.41051	-12.4581		1973-09-29	-13.9924	1974-06-15	-12.9	-12.6335	7	13.29	11.88	11.19	13.29	13.99	16.08	20.28											-8.89403	6	-9.64248	14.69	-130.653	-141.648				-8.70235	7	-9.68909	454.913
-9.14268	1	-10.9101	605.101							10.2828	-13.0174		1974-05-31	-12.4581	1974-07-15	-12.7	-12.2891	8	11.59	10.79	9.09	11.19	12.58	11.89	14.69	18.18										-8.70235	7	-9.68909	18.18	-158.209	-176.148				-9.14268	1	-10.9101	511.777
-8.9216	2	-10.6412	655.526							10.2929	-12.7461		1974-06-14	-13.0174	1974-08-15		-12.2937	9	10.49	9.79	7.69	9.09	10.49	11.89	10.49	13.29	16.78									-8.70235	7	-9.68909	10.49	-91.2877	-101.639				-8.9216	2	-10.6412	568.641
-8.71625	3	-10.1089	705.951							10.3713	-12.1957		1974-06-25	-12.7461	1974-09-15		-12.7047	10	9.79	8.39	7.69	7.7	9.09	9.78	9.8	10.49	11.89	15.38								-9.14268	1	-10.9101	9.79	-89.5068	-106.81				-8.71625	3	-10.1089	625.505
-9.23138	4	-10.2858	756.376							10.3713	-12.3726		1974-07-07	-12.1957	1974-10-15	-11	-12.8036	11	9.09	7.69	7.7	5.59	7.69	8.39	9.79	8.4	10.49	10.48	14.69							-8.9216	2	-10.6412	7.69	-68.6071	-81.831				-9.23138	4	-10.2858	682.369
-8.8803	5	-10.0385	806.801							9.57218	-12.3095		1974-07-21	-12.3726	1975-05-15		-12.8757	12	8.39	6.99	7	5.59	6.99	7.7	8.39	8.39	7.69	10.49	9.09	13.29						-8.71625	3	-10.1089	9.09	-79.2307	-91.8897				-8.8803	5	-10.0385	739.233
-8.95629	6	-10.1808	857.227							9.48688	-12.4714		1974-08-07	-12.3095	1975-06-15	-13.1	-12.1235	13	7.69	6.3	6.99	5.59	5.6	6.29	7.69	8.4	6.99	7.69	9.79	8.39	12.59					-9.23138	4	-10.2858	10.49	-96.8372	-107.898				-8.95629	6	-10.1808	796.097
-8.48979	7	-9.71738	907.652							7.16365	-12.5433		1974-08-22	-12.4714	1975-07-15	-12.5		14	7.69	5.6	6.29	5.59	4.9	6.29	6.3	6.99	6.99	7.7	6.28	9.1	8.39	11.89				-8.8803	5	-10.0385	11.89	-105.587	-119.358				-8.48979	7	-9.71738	852.961
-8.65918	1	-9.9557	958.077	-9	75	5.2312	-13.2269			3.6652	-13.5877		1974-09-09	-12.5433	1975-08-15	-12.6		15	6.29	6.3	5.59	5.6	4.19	5.6	5.59	6.99	6.3	6.99	6.29	7	8.38	7.7	11.19			-8.95629	6	-10.1808	10.49	-93.9515	-106.796				-8.65918	1	-9.9557	909.825
-8.5164	2	-10.1276	1008.5			7.36432	-12.9073						1974-10-01	-13.5877	1975-09-15	-11.2		16	6.29	5.6	5.59	4.9	4.19	4.9	5.59	5.6	6.29	4.9	7.69	5.59	7.7	6.99	7.69	10.49		-8.48979	7	-9.71738	13.29	-112.829	-129.144				-8.5164	2	-10.1276	966.69
-8.78609	3	-10.0261	1058.93			7.36432	-12.8058						1975-05-29	-13.2269	1975-10-15	-11																				-8.65918	1	-9.9557	16.78	-145.301	-167.057				-8.78609	3	-10.0261	1023.55
-7.7085	4	-9.74528	1109.35			7.83294	-12.417						1975-06-08	-12.9073	1976-05-15	-13.4		6.62038	9.66376	12.5381	14.0858	13.7684	8.69092	4.24365	0.404772											-8.65918	1	-9.9557	8.39	-72.6505	-83.5283				-7.7085	4	-9.74528	1080.42
-7.4026	5	-9.34781	1159.78			10.5482	-11.3939						1975-06-18	-12.8058	1976-06-15	-12.3																				-8.5164	2	-10.1276	6.99	-59.5296	-70.7916				-7.4026	5	-9.34781	1137.28
-8.58723	6	-9.30052	1210.2			10.5482	-11.3466						1975-06-27	-12.417	1976-07-15	-12.3																				-8.78609	3	-10.0261	7	-61.5026	-70.1826				-8.58723	6	-9.30052	1194.15
-8.10513	1	-9.46895	1260.63			10.2846	-11.5758						1975-07-05	-11.3939	1976-08-15	-12																				-7.7085	4	-9.74528	5.59	-43.0905	-54.4761				-8.10513	1	-9.46895	1251.01
-8.26706	2	-9.61301	1311.05			9.39844	-11.924						1975-07-16	-11.3466	1976-09-15	-11.1																				-7.4026	5	-9.34781	6.99	-51.7442	-65.3412				-8.26706	2	-9.61301	1307.87
-8.39744	3	-9.6324	1361.48			9.39844	-11.9434						1975-07-28	-11.5758	1976-10-15	-11.8																				-8.58723	6	-9.30052	7.7	-66.1217	-71.614				-8.39744	3	-9.6324	1364.74
-9.03988	4	-9.63561	1411.9			7.40485	-12.406						1975-08-10	-11.924	1977-05-15	-13.1																				-8.10513	1	-9.46895	8.39	-68.0021	-79.4445				-9.03988	4	-9.63561	1421.6
-9.56423	5	-9.55001	1462.33			6.12616	-12.615						1975-08-21	-11.9434	1977-06-15																					-8.26706	2	-9.61301	8.39	-69.3607	-80.6532				-9.56423	5	-9.55001	1478.47
-9.51711	6	-9.16204	1512.75	-9	76	3.17324	-12.9074			7.38073	-11.938		1975-09-02	-12.406	1977-07-15	-13																				-8.39744	3	-9.6324	7.69	-64.5763	-74.0732				-9.51711	6	-9.16204	1535.33
-9.49408	1	-9.46861	1563.18							8.69092	-11.9426		1975-09-16	-12.615	1977-08-15																					-9.03988	4	-9.63561	10.49	-94.8283	-101.078				-9.49408	1	-9.46861	1592.19
-9.3533	2	-9.32772	1613.6							8.91286	-11.7506		1975-10-01	-12.9074	1977-09-15																					-9.56423	5	-9.55001	9.09	-86.9389	-86.8096				-9.3533	2	-9.32772	1649.06
-9.65875	3	-9.3124	1664.03							10.6366	-11.3381		1976-05-31	-11.938	1977-10-15																					-9.51711	6	-9.16204	13.29	-126.482	-121.764				-9.65875	3	-9.3124	1705.92
-9.36728	4	-9.6975	1714.45							10.6366	-11.7232		1976-06-14	-11.9426	1978-05-15	-13.4																				-9.51711	6	-9.16204	10.49	-99.8345	-96.1098				-9.36728	4	-9.6975	1762.79
-9.38109	5	-9.85077	1764.88							10.317	-11.9501		1976-06-25	-11.7506	1978-06-15	-12.8																				-9.49408	1	-9.46861	9.79	-92.9471	-92.6977				-9.38109	5	-9.85077	1819.65
-9.06908	6	-10.1853	1815.3							10.2828	-12.2925		1976-07-07	-11.3381	1978-07-15	-12.6																				-9.3533	2	-9.32772	7.69	-71.9269	-71.7302				-9.06908	6	-10.1853	1876.51
-9.29154	7	-10.0406	1865.73							2.98126	-13.8302		1976-07-21	-11.7232	1978-08-15	-12.5																				-9.65875	3	-9.3124	9.09	-87.798	-84.6497				-9.29154	7	-10.0406	1933.38
-8.65315	8	-9.60541	1916.15	-9	77	4.79379	-12.9774			0.886474	-13.8777		1976-08-07	-11.9501	1978-09-15	-12.3																				-9.36728	4	-9.6975	10.49	-98.2627	-101.727				-8.65315	8	-9.60541	1990.24
-8.59868	9	-9.72433	1966.58			7.89496	-12.3818						1976-08-22	-12.2925	1978-10-15	-12.3																				-9.38109	5	-9.85077	11.89	-111.541	-117.126				-8.59868	9	-9.72433	2047.11
-8.70694	10	-9.4557	2017			7.89496	-12.1131						1976-09-09	-13.8302	1979-05-15	-13.3																				-9.06908	6	-10.1853	10.49	-95.1347	-106.844				-8.70694	10	-9.4557	2103.97
-9.48832	1	-10.0121	2067.43			9.75087	-12.2419						1976-10-01	-13.8777	1979-06-15	-13.2																				-9.29154	7	-10.0406	13.29	-123.485	-133.44				-9.48832	1	-10.0121	2160.84
-9.35362	2	-10.1688	2117.85			10.2828	-12.276						1977-05-29	-12.9774	1979-07-15	-12.7																				-8.65315	8	-9.60541	16.78	-145.2	-161.179				-9.35362	2	-10.1688	2217.7
-9.16825	3	-10.2961	2168.28			9.94839	-12.4804						1977-06-12	-12.3818	1979-08-15	-12.8																				-8.65315	8	-9.60541	9.79	-84.7144	-94.037				-9.16825	3	-10.2961	2274.56
-8.87725	4	-10.1671	2218.7			9.31	-12.4985						1977-06-23	-12.1131	1979-09-15	-12.2																				-8.59868	9	-9.72433	8.39	-72.1429	-81.5872				-8.87725	4	-10.1671	2331.43
-9.08211	5	-10.2428	2269.13			8.42633	-12.7778						1977-07-03	-12.2419	1979-10-15	-12.4																				-8.70694	10	-9.4557	7.69	-66.9564	-72.7143				-9.08211	5	-10.2428	2388.29
-9.02508	6	-10.1754	2319.55			4.62268	-13.5868						1977-07-15	-12.276	1980-05-15	-13.4																				-9.48832	1	-10.0121	7.7	-73.06	-77.0934				-9.02508	6	-10.1754	2445.16
-8.71033	7	-9.87558	2369.98	-9	78	2.77063	-13.7137			5.22064	-13.1492		1977-07-29	-12.4804	1980-06-15	-13																				-9.35362	2	-10.1688	9.09	-85.0244	-92.434				-8.71033	7	-9.87558	2502.02
-9.58689	1	-10.0207	2420.4							9.48688	-12.3113		1977-08-11	-12.4985	1980-07-15	-12.7																				-9.16825	3	-10.2961	9.78	-89.6655	-100.696				-9.58689	1	-10.0207	2558.88
-10.0421	2	-10.2791	2470.83							9.48688	-12.5697		1977-08-26	-12.7778	1980-08-15	-12.2																				-8.87725	4	-10.1671	9.8	-86.997	-99.638					2		2615.75
-10.4974	3	-10.5375	2521.25							9.72119	-12.7741		1977-09-09	-13.5868	1980-09-15	-12.2																				-9.08211	5	-10.2428	10.49	-95.2714	-107.447				-10.4974	3	-10.5375	2672.61
-10.2334	4	-10.4284	2571.68							11.0788	-12.3522		1977-09-30	-13.7137	1980-10-15	-11.9																				-9.02508	6	-10.1754	11.89	-107.308	-120.985				-10.2334	4	-10.4284	2729.48
-10.3835	5	-10.2724	2622.1							11.0788	-12.1962		1978-05-29	-13.1492																						-8.71033	7	-9.87558	15.38	-133.965	-151.886				-10.3835	5	-10.2724	2786.34
-10.1661	6	-10.5171	2672.53							10.5517	-12.5624		1978-06-08	-12.3113																						-8.71033	7	-9.87558	8.39	-73.0796	-82.8561				-10.1661	6	-10.5171	2843.2
-10.0264	7	-10.4977	2722.96							8.77936	-12.9513		1978-06-18	-12.5697																						-9.58689	1	-10.0207	6.99	-67.0124	-70.0448				-10.0264	7	-10.4977	2900.07
-9.64833	8	-10.3295	2773.38							8.77936	-12.7831		1978-06-17	-12.7741																						-10.0421	2	-10.2791	7	-70.295	-71.9538				-9.64833	8	-10.3295	2956.93
-8.95728	9	-10.0113	2823.81							5.97755	-13.1105		1978-07-05	-12.3522																						-10.4974	3	-10.5375	5.59	-58.6805	-58.9046				-8.95728	9	-10.0113	3013.8
-9.63108	10	-9.98526	2874.23							4.18048	-13.4986		1978-07-16	-12.1962																						-10.2334	4	-10.4284	6.99	-71.5317	-72.8945				-9.63108	10	-9.98526	3070.66
-8.21096	11	-9.31065	2924.66	-9	79	5.24611	-12.5784			1.74562	-13.385		1978-07-28	-12.5624																						-10.3835	5	-10.2724	7.7	-79.9527	-79.0977				-8.21096	11	-9.31065	3127.52
-9.05538	1	-9.64998	2975.08			10.3713	-11.7368						1978-08-10	-12.9513																						-10.1661	6	-10.5171	8.39	-85.2939	-88.2383				-9.05538	1	-9.64998	3184.39
-10.2344	2	-10.1983	3025.51			10.3713	-12.2851						1978-08-21	-12.7831																						-10.0264	7	-10.4977	8.39	-84.1213	-88.0757				-10.2344	2	-10.1983	3241.25
-10.9018	3	-10.7274	3075.93			10.3713	-12.8143						1978-09-02	-13.1105																						-9.64833	8	-10.3295	7.69	-74.1957	-79.4336				-10.9018	3	-10.7274	3298.12
-11.085	4	-10.6041	3126.36			10.9812	-12.5504						1978-09-16	-13.4986																						-8.95728	9	-10.0113	10.49	-93.9618	-105.018				-11.085	4	-10.6041	3354.98
-11.0285	5	-10.3499	3176.78			11.0788	-12.2737						1978-10-01	-13.385																						-9.63108	10	-9.98526	9.09	-87.5465	-90.766				-11.0285	5	-10.3499	3411.85
-11.5911	1	-10.7432	3227.21			11.0788	-12.667						1979-05-27	-12.5784																						-8.21096	11	-9.31065	13.29	-109.124	-123.738				-11.5911	1	-10.7432	3468.71
-11.3219	2	-10.665	3277.63			10.0564	-12.8244						1979-06-06	-11.7368																						-8.21096	11	-9.31065	7.69	-63.1422	-71.5989				-11.3219	2	-10.665	3525.57
-11.6324	3	-10.6931	3328.06			9.57532	-12.9633						1979-06-16	-12.2851																						-9.05538	1	-9.64998	6.3	-57.0489	-60.7949				-11.6324	3	-10.6931	3582.44
-11.7158	4	-10.7274	3378.48			9.57532	-12.9977						1979-06-25	-12.8143																						-10.2344	2	-10.1983	6.99	-71.5383	-71.286				-11.7158	4	-10.7274	3639.3
-12.101	5	-10.5829	3428.91			5.39614	-13.8161						1979-07-03	-12.5504																						-10.9018	3	-10.7274	5.59	-60.9409	-59.9663				-12.101	5	-10.5829	3696.17
-11.7631	6	-10.5398	3479.33			4.4458	-13.992						1979-07-11	-12.2737																						-11.085	4	-10.6041	5.6	-62.0757	-59.383				-11.7631	6	-10.5398	3753.03
-10.9489	7	-9.56563	3529.76	-9	80	0.683934	-13.8846			4.4458	-13.0178		1979-07-21	-12.667																						-11.0285	5	-10.3499	6.29	-69.3694	-65.1008				-10.9489	7	-9.56563	3809.89
-10.6189	1	-9.82018	3580.18							11.6979	-11.6014		1979-08-02	-12.8244																						-11.5911	1	-10.7432	7.69	-89.1352	-82.6149				-10.6189	1	-9.82018	3866.76
-10.4664	2	-9.70796	3630.61							11.6979	-11.4891		1979-08-13	-12.9633																						-11.3219	2	-10.665	8.4	-95.1037	-89.5862				-10.4664	2	-9.70796	3923.62
-10.7203	3	-10.0304	3681.03							11.6979	-11.8116		1979-08-23	-12.9977			wNAO																			-11.6324	3	-10.6931	6.99	-81.3103	-74.7445				-10.7203	3	-10.0304	3980.49
-11.2569	4	-10.0239	3731.46							11.6979	-11.8051		1979-09-04	-13.8161		arithmetic means			weighted annual means																	-11.7158	4	-10.7274	7.69	-90.0948	-82.4941				-11.2569	4	-10.0239	4037.35
-12.1146	5	-10.5092	3781.88							12.5924	-12.0842		1979-09-18	-13.992		-9.85864	0.34	1	-8.5078	-9.81402	-8.30075	1.02494	0.535874	1972												-12.101	5	-10.5829	9.79	-118.468	-103.606				-12.1146	5	-10.5092	4094.21
-12.0838	6	-10.0626	3832.31							12.7592	-11.5992		1979-10-02	-13.8846		-9.82572	2.52	2	-8.65353	-9.81574	-8.52045	1.01562	0.307078	1973												-11.7631	6	-10.5398	8.39	-98.6928	-88.4293				-12.0838	6	-10.0626	4151.08
-10.7451	7	-9.19595	3882.73							12.7592	-10.7326		1980-05-26	-13.0178		-10.1697	1.23	3	-8.83138	-10.1242	-8.74566	1.0098	0.164363	1974												-10.9489	7	-9.56563	12.59	-137.847	-120.431				-10.7451	7	-9.19595	4207.94
-10.8022	1	-9.67332	3933.16							12.7592	-11.21		1980-06-04	-11.6014		-9.63041	1.63	4	-8.64828	-9.59755	-8.98423	0.962606	-0.993628	1975												-10.9489	7	-9.56563	6.29	-68.8687	-60.1678				-10.8022	1	-9.67332	4264.81
-11.0438	2	-9.66397	3983.58							10.0175	-11.8323		1980-06-12	-11.4891		-9.62782	1.37	5	-9.26129	-9.65502	-9.2446	1.00181	-0.0318215	1976												-10.6189	1	-9.82018	5.6	-59.4658	-54.993				-11.0438	2	-9.66397	4321.67
-11.0168	3	-9.83752	4034.01							10.0175	-12.0059		1980-06-20	-11.8116		-9.97233	-2.14	6	-8.95105	-9.98518	-9.53025	0.939225	-1.56729	1977												-10.4664	2	-9.70796	5.59	-58.5071	-54.2675				-11.0168	3	-9.83752	4378.53
-10.9193	4	-9.9811	4084.43							10.0175	-12.1495		1980-06-26	-11.8051		-10.1721	0.17	7	-9.54795	-10.1102	-9.8413	0.970191	-0.80752	1978												-10.7203	3	-10.0304	4.9	-52.5296	-49.1489					4		4435.4
-10.8217	5	-10.1247	4134.86							8.19109	-12.7139		1980-07-03	-12.0842		-10.3352	-2.25	8	-10.9477	-10.3004	-10.1676	1.07672	1.80632	1979												-11.2569	4	-10.0239	4.19	-47.1663	-42.0001				-10.8217	5	-10.1247	4492.26
-10.7021	6	-9.94131	4185.28							6.2146	-12.9859		1980-07-10	-11.5992		-9.84551	0.56	9	-10.8394	-9.83094	-10.4951	1.03281	0.728881	1980												-12.1146	5	-10.5092	4.9	-59.3615	-51.4949				-10.7021	6	-9.94131	4549.13
-10.1129	7	-9.72339	4235.71							6.2146	-12.768		1980-07-18	-10.7326		-9.6537	2.05	10	-9.86322	-9.58037	-10.8225	0.911365	-2.25088	1981												-12.0838	6	-10.0626	5.59	-67.5486	-56.2498				-10.1129	7	-9.72339	4605.99
-10.1623	8	-9.6672	4286.13	-9						-0.113684	-14.1699		1980-07-26	-11.21		-9.65046	0.8	11	-10.846	-9.64386	-11.1531	0.97247	-0.751609	1982												-10.7451	7	-9.19595	5.6	-60.1728	-51.4973				-10.1623	8	-9.6672	4662.86
-10.4238	1	-9.87783	4336.56										1980-08-04	-11.8323		-9.54322	3.42	12	-11.6799	-9.52022	-11.4752	1.01784	0.361639	1983												-10.8022	1	-9.67332	6.29	-67.9456	-60.8452				-10.4238	1	-9.87783	4719.72
-10.7714	2	-10.1454	4386.98										1980-08-12	-12.0059		-9.6599	1.6	13	-12.0374	-9.63603	-11.7693	1.02278	0.48267	1984												-11.0438	2	-9.66397	4.9	-54.1144	-47.3535				-10.7714	2	-10.1454	4776.58
-10.5122	3	-10.0887	4437.41										1980-08-22	-12.1495		-9.99425	-0.63	14	-12.3157	-9.99767	-12.019	1.02469	0.529548	1985												-11.0168	3	-9.83752	7.69	-84.7196	-75.6505				-10.5122	3	-10.0887	4833.45
-9.70062	4	-9.66009	4487.83										1980-09-01	-12.7139		-9.7786	0.5	15	-12.8489	-9.74074	-12.2141	1.05197	1.19892	1986												-10.9193	4	-9.9811	5.59	-61.0388	-55.7944				-9.70062	4	-9.66009	4890.31
-9.90668	5	-9.70269	4538.26										1980-09-11	-12.9859		-9.82281	-0.75	16	-12.6359	-9.8123	-12.353	1.0229	0.485757	1987												-10.8217	5	-10.1247	7.7	-83.3271	-77.9601				-9.90668	5	-9.70269	4947.18
-9.28895	6	-9.22279	4588.68										1980-09-21	-12.768		-10.0735	0.72	17	-12.1658	-10.0171	-12.4463	0.977469	-0.628964	1988												-10.7021	6	-9.94131	6.99	-74.8079	-69.4898				-9.28895	6	-9.22279	5004.04
-9.90968	1	-9.50809	4639.11										1980-10-04	-14.1699		-9.37941	5.08	18	-12.4113	-9.36136	-12.5106	0.992061	-0.270938	1989												-10.1129	7	-9.72339	7.69	-77.7678	-74.7729				-9.90968	1	-9.50809	5060.9
-10.144	2	-9.94144	4689.53													-9.19302	3.96	19	-12.1865	-9.15185	-12.559	0.970344	-0.803764	1990												-10.1623	8	-9.6672	10.49	-106.603	-101.409				-10.144	2	-9.94144	5117.77
-9.88247	3	-9.71643	4739.96													-9.38704	1.03	20	-13.4712	-9.92855	-12.6003	1.06912	1.61976	1991												-10.1623	8	-9.6672	8.39	-85.2621	-81.1078				-9.88247	3	-9.71643	5174.63
-9.53785	4	-9.68625	4790.38													-9.24426	3.28	21	-12.618	-9.24908	-12.6377	0.998441	-0.114401	1992												-10.4238	1	-9.87783	6.99	-72.8625	-69.046				-9.53785	4	-9.68625	5231.5
-9.06662	5	-8.62747	4840.81	-9												-8.9999	2.67		-12.1961	-10.4101				1993												-10.7714	2	-10.1454	7	-75.3999	-71.0179				-9.06662	5	-8.62747	5288.36
-10.497	1	-9.16535	4891.23																																	-10.5122	3	-10.0887	5.59	-58.7632	-56.3958				-10.497	1	-9.16535	5345.22
-10.6533	2	-9.43778	4941.66																																	-9.70062	4	-9.66009	6.99	-67.8073	-67.524				-10.6533	2	-9.43778	5402.09
-10.291	3	-9.20971	4992.08					sample direction from umbo to tip																												-9.90668	5	-9.70269	7.7	-76.2814	-74.7107				-10.291	3	-9.20971	5458.95
-11.8856	4	-10.1337	5042.51							arithmetic means																										-9.28895	6	-9.22279	8.39	-77.9343	-77.3792				-11.8856	4	-10.1337	5515.82
-12.3297	5	-10.3145	5092.93					1			1.28						1967																			-9.90968	1	-9.50809	8.39	-83.1422	-79.7729				-12.3297	5	-10.3145	5572.68
-12.0581	6	-10.1534	5143.36					2			-1.04						1968																			-10.144	2	-9.94144	7.69	-78.0071	-76.4497				-12.0581	6	-10.1534	5629.54
-12.221	7	-10.1714	5193.78					3			-4.89						1969																			-9.88247	3	-9.71643	10.49	-103.667	-101.925				-12.221	7	-10.1714	5686.41
-10.608	8	-9.89854	5244.21					4			-1.89						1970																			-9.53785	4	-9.68625	9.09	-86.699	-88.0481				-10.608	8	-9.89854	5743.27
-10.8173	9	-9.87212	5294.63					5			-0.96						1971																			-9.06662	5	-8.62747	13.29	-120.495	-114.659				-10.8173	9	-9.87212	5800.14
-9.647	10	-9.17106	5345.06	-9	451.9	451.9	451.9	6	-8.53209	-9.85864	0.34	1	-8.53209	-8.33976	1.02306	0.65724	1972																			-9.06662	5	-8.62747	9.09	-82.4156	-78.4237				-9.647	10	-9.17106	5857	451.9
-10.1623	1	-9.6672	5395.48		346.296	798.196	346.296	7	-8.62181	-9.82572	2.52	2	-8.62181	-8.53607	1.01004	0.289883	1973	-12.4558																		-10.497	1	-9.16535	7.69	-80.722	-70.4815				-10.1623	1	-9.6672	5913.87	346.296
-9.91394	2	-9.16693	5445.91		436.317	1234.51	436.317	8	-8.85554	-10.1697	1.23	3	-8.85554	-8.74057	1.01315	0.377629	1974	-12.4986																		-10.6533	2	-9.43778	7.7	-82.0301	-72.6709				-9.91394	2	-9.16693	5970.73	436.317
-11.5946	3	-9.52452	5496.34		487.92	1722.43	487.92	9	-8.54591	-9.63041	1.63	4	-8.54591	-8.96448	0.953308	-1.31113	1975	-13.2752																		-10.291	3	-9.20971	5.59	-57.5266	-51.4823				-11.5946	3	-9.52452	6027.59	487.92
-11.9367	4	-9.66731	5546.76		356.617	2079.05	356.617	10	-9.30949	-9.62782	1.37	5	-9.30949	-9.22	1.00971	0.28034	1976	-11.9564																		-11.8856	4	-10.1337	7.69	-91.4002	-77.9282				-11.9367	4	-9.66731	6084.46	356.617
-11.9451	5	-9.82051	5597.19		397.611	2476.66	397.611	11	-8.96637	-9.97233	-2.14	6	-8.96637	-9.50968	0.942868	-1.60573	1977	-13.0532																		-12.3297	5	-10.3145	8.39	-103.446	-86.539				-11.9451	5	-9.82051	6141.32	397.611
-12.2687	6	-10.0194	5647.61		633.106	3109.77	633.106	12	-9.67449	-10.1721	0.17	7	-9.67449	-9.83207	0.983972	-0.445822	1978	-13.2459																		-12.0581	6	-10.1534	9.79	-118.049	-99.402				-12.2687	6	-10.0194	6198.19	633.106
-12.6381	7	-9.71519	5698.04		722.347	3832.12	722.347	13	-10.8915	-10.3352	-2.25	8	-10.8915	-10.1708	1.07086	2.00604	1979	-12.6954																		-12.221	7	-10.1714	8.4	-102.657	-85.4399				-12.6381	7	-9.71519	6255.05	722.347
-12.9516	8	-9.90258	5748.46		689.705	4521.82	689.705	14	-10.9085	-9.84551	0.56	9	-10.9085	-10.5065	1.03826	1.08611	1980	-13.0178																		-10.608	8	-9.89854	10.49	-111.278	-103.836				-12.9516	8	-9.90258	6311.91	689.705
-12.374	9	-9.25268	5798.89		492.517	5014.34	492.517	15	-9.94222	-9.6537	2.05	10	-9.94222	-10.8405	0.917139	-2.33177	1981																			-10.8173	9	-9.87212	10.48	-113.365	-103.46				-12.374	9	-9.25268	6368.78	492.517
-12.0612	10	-9.06805	5849.31	-9	518.042	5532.38	518.042	16	-10.9159	-9.65046	0.8	11	-10.9159	-11.1836	0.976059	-0.669133	1982																			-9.647	10	-9.17106	14.69	-141.714	-134.723				-12.0612	10	-9.06805	6425.64	518.042
-12.4973	1	-9.43875	5899.74		476.996	6009.38	476.996	17	-11.5903	-9.54322	3.42	12	-11.5903	-11.5238	1.00577	0.169375	1983																			-9.647	10	-9.17106	9.09	-87.6912	-83.3649				-12.4973	1	-9.43875	6482.51	476.996
-12.7166	2	-9.7004	5950.16		539.151	6548.53	539.151	18	-12.1198	-9.6599	1.6	13	-12.1198	-11.8361	1.02397	0.682875	1984																			-10.1623	1	-9.6672	7.69	-78.1485	-74.3408				-12.7166	2	-9.7004	6539.37	539.151
-12.7624	3	-9.79636	6000.59		477.719	7026.24	477.719	19	-12.3211	-9.99425	-0.63	14	-12.3211	-12.0977	1.01846	0.527488	1985																			-9.91394	2	-9.16693	7.7	-76.3373	-70.5854				-12.7624	3	-9.79636	6596.23	477.719
-11.7995	4	-9.80151	6051.01		378.176	7404.42	378.176	20	-12.8091	-9.7786	0.5	15	-12.8091	-12.2952	1.04179	1.18584	1986																			-11.5946	3	-9.52452	5.59	-64.8137	-53.2421				-11.7995	4	-9.80151	6653.1	378.176
-12.5742	5	-9.95338	6101.44		320.807	7725.23	320.807	21	-12.7006	-9.82281	-0.75	16	-12.7006	-12.4265	1.02206	0.629029	1987																			-11.9367	4	-9.66731	7.69	-91.7929	-74.3416				-12.5742	5	-9.95338	6709.96	320.807
-11.9834	6	-9.88308	6151.86		478.515	8203.74	478.515	22	-12.2155	-10.0735	0.72	17	-12.2155	-12.5064	0.976737	-0.649998	1988																			-11.9451	5	-9.82051	8.39	-100.219	-82.3941				-11.9834	6	-9.88308	6766.83	478.515
-11.9756	7	-9.83392	6202.29		413.993	8617.74	413.993	23	-12.4585	-9.37941	5.08	18	-12.4585	-12.5589	0.992008	-0.219054	1989																			-12.2687	6	-10.0194	9.79	-120.111	-98.0897				-11.9756	7	-9.83392	6823.69	413.993
-11.9231	8	-9.84141	6252.71		336.656	8954.39	336.656	24	-12.2458	-9.19302	3.96	19	-12.2458	-12.6011	0.971803	-0.789228	1990																			-12.6381	7	-9.71519	8.4	-106.16	-81.6076				-11.9231	8	-9.84141	6880.55	336.656
-11.5719	9	-9.64403	6303.14		404.419	9358.81	404.419	25	-12.6796	-9.38704	1.03	20	-12.6796	-12.6435	1.00285	0.0868433	1991																			-12.9516	8	-9.90258	10.49	-135.863	-103.878				-11.5719	9	-9.64403	6937.42	404.419
-11.4528	10	-9.298	6353.56	-9	270.604	9629.41	270.604	26	-12.5195	-9.24426	3.28	21	-12.7032	-12.6867	1.0013	0.0431812	1992																			-12.374	9	-9.25268	10.48	-129.68	-96.9681				-11.4528	10	-9.298	6994.28	270.604
-11.4761	11	-9.27788	6403.99		151.21	9780.62	151.21	27	-12.1591	-8.9999	2.67	22					1993																			-12.0612	10	-9.06805	14.69	-177.179	-133.21				-11.4761	11	-9.27788	7051.15	151.21
-12.5801	1	-10.1772	6454.41																																	-12.0612	10	-9.06805	9.09	-109.636	-82.4286				-12.5801	1	-10.1772	7108.01
-12.4063	2	-9.99463	6504.84				9780.62																													-12.4973	1	-9.43875	7.69	-96.1044	-72.584				-12.4063	2	-9.99463	7164.88
-12.9173	3	-10.4095	6555.26				56.8641																													-12.7166	2	-9.7004	7.7	-97.9182	-74.6931				-12.9173	3	-10.4095	7221.74
-12.8094	4	-10.4472	6605.69																																	-12.7624	3	-9.79636	5.59	-71.3418	-54.7616				-12.8094	4	-10.4472	7278.6
-12.4832	5	-10.2334	6656.11																																	-11.7995	4	-9.80151	7.69	-90.7378	-75.3736				-12.4832	5	-10.2334	7335.47
-12.5136	6	-10.0672	6706.54																																	-12.5742	5	-9.95338	8.39	-105.498	-83.5088				-12.5136	6	-10.0672	7392.33
-12.413	7	-10.0826	6756.96		1	451.9	221.9	incomplete		221.9																										-11.9834	6	-9.88308	9.79	-117.317	-96.7553				-12.413	7	-10.0826	7449.2
-12.1589	8	-9.95486	6807.39	-9	2	346.296	568.196			568.196																										-11.9756	7	-9.83392	8.4	-100.595	-82.6049					8		7506.06
-11.9048	9	-9.82714	6857.81		3	436.317	1004.51			1004.51																										-11.9231	8	-9.84141	10.49	-125.073	-103.236				-11.9048	9	-9.82714	7562.92
-12.0193	10	-9.73228	6908.24		4	487.92	1492.43			1492.43																										-11.5719	9	-9.64403	10.48	-121.273	-101.069				-12.0193	10	-9.73228	7619.79
-12.5618	1	-9.82697	6958.66		5	356.617	1849.05			1849.05																										-11.4528	10	-9.298	14.69	-168.241	-136.588				-12.5618	1	-9.82697	7676.65
-12.1886	2	-9.65071	7009.09		6	397.611	2246.66			2246.66																										-11.4528	10	-9.298	9.79	-112.123	-91.0274				-12.1886	2	-9.65071	7733.52
-13.002	3	-10.004	7059.51		7	633.106	2879.77			2879.77																										-11.4761	11	-9.27788	8.39	-96.2847	-77.8414				-13.002	3	-10.004	7790.38
-12.8164	4	-9.47378	7109.94		8	722.347	3602.12			3602.12																										-12.5801	1	-10.1772	7.69	-96.7408	-78.2629				-12.8164	4	-9.47378	7847.24
-14.1278	5	-10.098	7160.36		9	689.705	4291.82			4291.82																										-12.4063	2	-9.99463	7.7	-95.5286	-76.9587				-14.1278	5	-10.098	7904.11
-14.2298	6	-10.0636	7210.79		10	492.517	4784.34			4784.34																										-12.9173	3	-10.4095	9.09	-117.418	-94.6226				-14.2298	6	-10.0636	7960.97
-13.2736	7	-9.56349	7261.21		11	518.042	5302.38			5302.38																										-12.8094	4	-10.4472	9.78	-125.276	-102.174				-13.2736	7	-9.56349	8017.84
-12.6167	8	-9.36983	7311.64	-9	12	476.996	5779.38			5779.38																										-12.4832	5	-10.2334	9.8	-122.336	-100.288				-12.6167	8	-9.36983	8074.7
-12.7489	1	-9.74525	7362.06		13	539.151	6318.53			6318.53																										-12.5136	6	-10.0672	10.49	-131.268	-105.605				-12.7489	1	-9.74525	8131.56
-13.0646	2	-10.167	7412.49		14	477.719	6796.24			6796.24																										-12.413	7	-10.0826	11.89	-147.591	-119.882				-13.0646	2	-10.167	8188.43
-13.2145	3	-10.2799	7462.91		15	378.176	7174.42			7174.42																										-12.1589	8	-9.95486	15.38	-187.004	-153.106				-13.2145	3	-10.2799	8245.29
-11.8583	4	-9.55211	7513.34	-9	16	320.807	7495.23			7495.23																										-12.0891	8	-9.84357	9.09	-109.89	-89.478				-11.8583	4	-9.55211	8302.16
-11.4672	5	-9.5867	7563.76		17	478.515	7973.74			7973.74																										-11.9048	9	-9.82714	7.69	-91.548	-75.5707				-11.4672	5	-9.5867	8359.02
-12.2825	1	-10.2166	7614.19		18	413.993	8387.74			8387.74																										-12.0193	10	-9.73228	7.7	-92.5485	-74.9385				-12.2825	1	-10.2166	8415.89
-12.5495	2	-10.4953	7664.61		19	336.656	8724.39			8724.39																										-12.5618	1	-9.82697	5.59	-70.2203	-54.9328				-12.5495	2	-10.4953	8472.75
-13.0129	3	-10.7517	7715.04		20	100	8824.39	incomplete 1991		8824.39																										-12.1886	2	-9.65071	7.69	-93.7303	-74.2139				-13.0129	3	-10.7517	8529.61
-13.5849	4	-11.1016	7765.46																																	-13.002	3	-10.004	8.39	-109.087	-83.9334				-13.5849	4	-11.1016	8586.48
-12.5853	5	-10.3212	7815.89				50.4251																													-12.8164	4	-9.47378	9.79	-125.473	-92.7483				-12.5853	5	-10.3212	8643.34
-11.6255	6	-9.64266	7866.31																																	-14.1278	5	-10.098	8.4	-118.674	-84.8228				-11.6255	6	-9.64266	8700.21
-11.4266	7	-9.59368	7916.74																																	-14.2298	6	-10.0636	10.49	-149.27	-105.567				-11.4266	7	-9.59368	8757.07
-11.762	8	-9.47371	7967.16	-9																																-13.2736	7	-9.56349	10.48	-139.107	-100.225				-11.762	8	-9.47371	8813.93
-12.8189	1	-9.63842	8017.59																																	-12.6167	8	-9.36983	14.69	-185.339	-137.643				-12.8189	1	-9.63842	8870.8
-12.9324	2	-9.49938	8068.01																																	-12.6167	8	-9.36983	18.18	-229.372	-170.343				-12.9324	2	-9.49938	8927.66
-13.2574	3	-9.54507	8118.44																																	-12.7489	1	-9.74525	15.39	-196.206	-149.979				-13.2574	3	-9.54507	8984.53
-12.2733	4	-9.28253	8168.87																																	-13.0646	2	-10.167	18.88	-246.66	-191.953				-12.2733	4	-9.28253	9041.39
-12.4842	5	-9.16275	8219.29																																	-13.2145	3	-10.2799	20.27	-267.858	-208.373				-12.4842	5	-9.16275	9098.25
-11.7807	6	-9.07195	8269.72																																	-11.8583	4	-9.55211	27.28	-323.495	-260.582				-11.7807	6	-9.07195	9155.12
-12.3592	1	-9.36148	8320.14	-9																																-11.8583	4	-9.55211	9.79	-116.093	-93.5152				-12.3592	1	-9.36148	9211.98
-12.7407	2	-9.41267	8370.57																																	-11.4672	5	-9.5867	8.39	-96.2099	-80.4324				-12.7407	2	-9.41267	9268.85
-11.6375	3	-8.80492	8420.99																																	-12.2825	1	-10.2166	7.69	-94.4527	-78.5656				-11.6375	3	-8.80492	9325.71
-12.3058	1	-9.17658	8471.42																																	-12.5495	2	-10.4953	7.7	-96.6311	-80.8139				-12.3058	1	-9.17658	9382.57
-12.7365	2	-9.57353	8521.84																																	-13.0129	3	-10.7517	9.09	-118.288	-97.7331				-12.7365	2	-9.57353	9439.44
-12.9292	3	-9.69478	8572.27																																	-13.5849	4	-11.1016	9.78	-132.86	-108.574				-12.9292	3	-9.69478	9496.3
-13.3976	4	-9.69025	8622.69																																	-12.5853	5	-10.3212	9.8	-123.336	-101.147				-13.3976	4	-9.69025	9553.17
-13.0708	5	-9.38218	8673.12	-9																																-11.6255	6	-9.64266	10.49	-121.951	-101.151				-13.0708	5	-9.38218	9610.03
-13.1319	6	-9.61564	8723.54																																	-11.4266	7	-9.59368	11.89	-135.862	-114.069				-13.1319	6	-9.61564	9666.9
-11.907	7	-8.87288	8773.97																																	-11.762	8	-9.47371	15.38	-180.9	-145.706				-11.907	7	-8.87288	9723.76
-12.4112	1	-9.12691	8824.39																																	-11.762	8	-9.47371	11.59	-136.322	-109.8				-12.4112	1	-9.12691	9780.62
																																				-12.8189	1	-9.63842	10.79	-138.316	-103.998
																																				-12.9324	2	-9.49938	9.09	-117.556	-86.3493
																																				-13.2574	3	-9.54507	11.19	-148.351	-106.809
																																				-12.2733	4	-9.28253	12.58	-154.398	-116.774
																																				-12.4842	5	-9.16275	11.89	-148.437	-108.945
																																				-11.7807	6	-9.07195	14.69	-173.058	-133.267
																																				-12.3592	1	-9.36148	18.18	-224.69	-170.192
																																				-12.3592	1	-9.36148	27.97	-345.687	-261.841
																																				-12.7407	2	-9.41267	31.47	-400.949	-296.217
																																				-11.6375	3	-8.80492	40.56	-472.018	-357.127
																																				-11.6375	3	-8.80492	15.38	-178.985	-135.42
																																				-12.3058	1	-9.17658	12.59	-154.93	-115.533
																																				-12.7365	2	-9.57353	14.69	-187.099	-140.635
																																				-12.9292	3	-9.69478	16.78	-216.951	-162.678
																																				-13.3976	4	-9.69025	18.18	-243.568	-176.169
																																				-13.0708	5	-9.38218	27.97	-365.589	-262.419
																																				-13.1319	6	-9.61564	31.47	-413.262	-302.604
																																				-11.907	7	-8.87288	40.56	-482.949	-359.884
																																				-11.907	7	-8.87288	42.66	-507.953	-378.517
																																				-12.4112	1	-9.12691	57.34	-711.66	-523.337
[truncated: 20 more columns]

[truncated: 10 more sheets: ED-NJB-A4R, ED-NJB-A2R, ED-NJB-A3R, ED-GTB-A1R, ED-GTB-A2R, ED-GJ-A1L, ED-GJ-A2R, ED-GJ-A3L, ED-GJ-D6R, ED-GJ-D5L]
