# Supplementary material for: Freshwater pearl mussels from northern Sweden serve as long-term, high-resolution stream water isotope recorders
Source: Copernicus journal article supplement (doi:10.5194/hess-24-673-2020), 2020-02-17
Supplement: Supplementary file 1 [file hess-24-673-2020-supplement.zip › hess-24-673-2020-supplement-title-page.pdf]

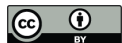

## *Supplement of*

# **Freshwater pearl mussels from northern Sweden serve as long-term, high-resolution stream water isotope recorders**

**Bernd R. Schöne et al.**

*Correspondence to:* Bernd R. Schöne (schoeneb@uni-mainz.de)

- [hess-24-673-2020-supplement-title-page.pdf](#)
- [Calculations.xlsx](#)
- [Supplementary data.xlsx](#)

The copyright of individual parts of the supplement might differ from the CC BY 4.0 License.
