# Supplementary material for: Freshwater pearl mussels from northern Sweden serve as long-term, high-resolution stream water isotope recorders
Source: Copernicus journal article supplement (doi:10.5194/hess-24-673-2020), 2020-02-17
Supplement: Supplementary file 1 [file Supplementary data.xlsx]

## Sheet: Isotope data (raw)
Note: No correction for different acid fractionation factors applied; missing data red
ED-NJB-A6R			ED-NJB-A4R			ED-NJB-A2R			ED-NJB-A3R			ED-GTB-A1R			ED-GTB-A2R			ED-GJ-A1L			ED-GJ-A2R			ED-GJ-A3L			ED-GJ-D6R
δ13C (‰)	δ18O (‰)		δ13C (‰)	δ18O (‰)		δ13C (‰)	δ18O (‰)		δ13C (‰)	δ18O (‰)		δ13C (‰)	δ18O (‰)		δ13C (‰)	δ18O (‰)		δ13C (‰)	δ18O (‰)		δ13C (‰)	δ18O (‰)		δ13C (‰)	δ18O (‰)		δ13C (‰)	δ18O (‰)
-8.49886	-9.88244		-8.53893	-9.81324		-9.54591	-10.3172		-13.7286	-10.558		-11.7097	-8.2041		-10.3228	-8.37474		-14.6894	-11.7468		-14.8467	-11.9011		-11.6734	-10.4681		-12.5473	-12.258
-8.68463	-10.1791		-8.46875	-10.413		-10.1869	-10.0011		-13.1505	-10.511		-11.6758	-8.29016		-10.8457	-8.0511		-14.4542	-10.8405		-15.7489	-12.2808		-12.3909	-10.4869		-12.7873	-12.2086
-8.63423	-9.87993		-8.34085	-10.2256		-11.6191	-9.60213		-11.4657	-9.75204		-10.9413	-8.44848		-10.6378	-7.69666		-14.4435	-11.2952		-14.2033	-11.0641		-12.3505	-10.795		-12.2672	-12.2705
-8.31065	-9.49314		-8.88442	-10.0172		-11.1309	-9.6024		-11.3499	-9.80114		-10.9012	-8.55715		-11.7547	-8.54866		-13.989	-11.5918		-14.3857	-10.6932		-12.0712	-11.0529		-12.5695	-12.2591
-8.27374	-9.79757		-9.48437	-10.5083		-10.7684	-9.56342		-11.6009	-9.67356		-11.2531	-8.68074		-11.9594	-8.65938		-14.3925	-12.052		-14.3007	-10.3178		-11.5048	-10.8768		-12.1613	-12.2839
-8.27555	-9.84517		-8.93815	-10.4536		-9.98878	-9.05867		-12.5394	-10.2895		-11.0828	-8.58707		-11.757	-8.39783		-13.6751	-11.9705		-13.4311	-11.0034		-11.8463	-11.3056		-12.4002	-12.3014
-8.42719	-9.92691		-8.61606	-10.4847		-9.98774	-8.65564		-13.0756	-10.1587		-11.1244	-8.49593		-12.1007	-8.94154		-13.7707	-11.8995		-15.4832	-11.8032		-11.9966	-11.2702		-12.393	-12.2558
-9.08792	-10.3605		-9.05563	-10.3168		-11.2278	-9.68939		-11.4311	-9.6842		-11.1273	-8.65504		-12.0601	-8.89596		-13.6309	-11.5641		-16.4561	-11.765		-11.7081	-11.1375		-12.2299	-12.1398
-9.00304	-9.85094		-8.74165	-10.6542		-9.73855	-9.52933		-11.2269	-10.3205		-11.3455	-8.15146		-11.3423	-8.44002		-13.3067	-11.2806		-14.1793	-10.9347		-11.9975	-11.1582		-12.6312	-11.942
-8.89403	-9.64248		-7.94275	-10.418		-9.84556	-8.8261		-10.642	-9.56898		-11.0277	-8.95383		-11.6554	-8.76934		-13.5308	-12.2656		-15.6911	-11.4139		-11.9803	-11.136		-12.6356	-12.177
-8.70235	-9.68909		-9.46237	-10.4146		-10.9344	-8.99461		-11.7226	-10.2456		-10.8627	-8.59225		-11.7807	-8.68376		-13.422	-12.0046		-15.4217	-11.4141		-12.3918	-11.4073		-12.3284	-11.9367
-9.14268	-10.9101		-9.88347	-10.3929		-10.9887	-9.6506		-11.1033	-9.7928		-11.0406	-8.64807		-12.1449	-8.87689		-13.4897	-11.5845		-13.7758	-11.7082		-12.1426	-11.267		-12.3111	-12.0523
-8.9216	-10.6412		-10.1019	-10.2094		-10.1188	-8.8826		-11.664	-9.84063		-11.0548	-8.84137		-12.0489	-8.65059		-13.4899	-12.2752		-14.8409	-12.0479		-12.1424	-11.3669		-11.8677	-11.8901
-8.71625	-10.1089		-10.1927	-10.3627		-10.2256	-8.93703		-11.0809	-9.20258		-11.0744	-8.5858		-11.3715	-8.49518		-12.924	-11.8068		-14.1659	-11.6242		-11.858	-11.4135		-12.0084	-11.9184
-9.23138	-10.2858		-9.59246	-10.3545		-10.5817	-9.65156		-11.2101	-9.0709		-11.6967	-9.31367		-11.531	-8.54698		-12.9103	-11.8084		-13.9477	-11.3007		-11.5164	-11.3938		-12.22	-11.8613
-8.8803	-10.0385		-9.58677	-10.4294		-10.0045	-10.3004		-11.6565	-9.43837		-12.0241	-9.29352		-11.1608	-8.3114		-13.1626	-11.3604		-14.6442	-12.1093		-12.188	-11.5023		-11.8335	-11.6785
-8.95629	-10.1808		-9.44694	-10.3956		-9.81195	-10.0674		-11.5477	-9.87457		-11.5847	-9.03182		-11.1973	-8.54531		-12.7189	-11.7174		-13.2875	-11.5358		-12.6744	-11.689		-12.1374	-11.7423
-8.48979	-9.71738		-8.83359	-10.001		-8.88755	-8.63091		-11.3973	-9.78668		-11.8828	-9.33071		-10.8122	-7.94713		-12.3844	-11.6209		-14.7644	-12.5103		-12.5613	-11.6895		-11.6334	-11.5551
-8.65918	-9.9557		-9.01251	-10.0153		-10.4163	-9.15901		-11.5627	-10.0654		-11.9831	-8.90758		-10.9091	-8.42884		-12.5248	-11.7697		-13.2029	-11.9985		-11.8127	-11.3995		-11.6557	-11.3481
-8.5164	-10.1276		-8.87091	-9.5481		-11.1753	-9.70677		-11.6994	-9.91503		-12.4104	-8.90927		-10.9067	-8.6891		-12.2472	-11.8264		-13.2309	-11.221		-11.5351	-11.4192		-11.5431	-11.19
-8.78609	-10.0261		-9.84447	-9.41978		-10.2612	-9.24897		-11.913	-9.78583		-12.7074	-9.01763		-10.9283	-8.80434		-12.5511	-11.5518		-13.854	-11.4883		-11.7483	-11.4769		-11.8963	-11.8033
-7.7085	-9.74528		-9.91926	-9.54225		-11.5732	-9.86191		-12.3098	-10.458		-12.5871	-8.9136		-11.3107	-8.92205		-12.3393	-11.4926		-12.8495	-11.0035		-11.831	-11.905		-11.8581	-11.5322
-7.4026	-9.34781		-10.7286	-9.70928		-10.0948	-9.70802		-11.9577	-9.56789		-12.7263	-8.87393		-10.6477	-8.66177		-11.9892	-11.4116		-13.08	-11.3803		-11.8547	-11.8665		-11.9111	-11.8563
-8.58723	-9.30052		-10.545	-9.74294		-11.416	-10.6776		-13.0173	-10.3752		-12.4961	-9.03163		-11.0973	-8.9688		-11.9711	-11.7753		-13.781	-12.0589		-12.0917	-12.059		-11.8095	-11.694
-8.10513	-9.46895		-10.9878	-9.81859		-9.90884	-10.9826		-12.8747	-10.1709		-12.9002	-9.50697		-10.5045	-8.70715		-11.953	-12.139		-13.9151	-11.7525		-11.5463	-11.5526		-12.8479	-11.5218
-8.26706	-9.61301		-11.4307	-9.89424		-10.8611	-9.75438		-11.0818	-8.89106		-12.7503	-9.8759		-10.4935	-8.53347		-12.0385	-12.1722		-14.0493	-11.4462		-11.4001	-11.5715		-13.0172	-11.4299
-8.39744	-9.6324		-11.6461	-10.1655		-11.3158	-9.664		-12.2169	-9.88463		-12.351	-9.86074		-10.7283	-8.80694		-11.9723	-12.0053		-12.8348	-11.6194		-11.3827	-11.5386		-12.7187	-11.2562
-9.03988	-9.63561		-11.0546	-9.74547		-9.50595	-9.4974		-11.7034	-9.9843		-11.6983	-9.51666		-11.4509	-9.08921		-11.906	-11.8384		-12.6623	-11.4115		-11.1699	-11.571		-12.4672	-11.2274
-9.56423	-9.55001		-10.8988	-9.91145		-10.4408	-9.22927		-10.8181	-9.14846		-11.9396	-9.40915		-11.5294	-9.22512		-12.26	-11.8113		-12.6916	-11.6356		-11.3896	-11.6105		-12.1648	-11.3205
-9.51711	-9.16204		-11.1901	-10.337		-11.5785	-10.3382		-12.721	-10.0607		-11.7558	-9.18816		-11.7353	-9.18461		-13.0071	-11.7431		-13.1996	-11.2689		-11.6127	-11.5499		-12.5822	-11.2284
-9.49408	-9.46861		-10.587	-10.0505		-10.133	-9.76309		-10.2814	-8.58662		-12.581	-9.75979		-11.4268	-9.14357		-12.8969	-11.6338		-13.1179	-11.4012		-11.5602	-11.5095		-12.129	-11.1603
-9.3533	-9.32772		-11.3817	-10.2235		-10.7647	-10.0504		-12.3572	-9.93527		-12.7538	-9.86157		-10.9256	-8.74727		-12.5189	-11.5211		-12.9132	-11.0027		-11.7534	-11.4849		-12.6786	-11.375
-9.65875	-9.3124		-10.2863	-9.78131		-11.3963	-10.3377		-12.6381	-9.57329		-12.8367	-9.91755		-11.2837	-9.04356		-12.3389	-11.4456		-12.1264	-11.1143		-11.788	-11.5765		-12.6788	-11.1952
-9.36728	-9.6975		-10.4712	-9.99384		-11.7082	-10.1831		-11.8244	-9.00288		-12.7728	-9.96946		-12.2964	-9.54145		-12.3821	-11.5173		-11.8171	-11.0678		-11.4166	-11.4037		-12.5535	-11.5541
-9.38109	-9.85077		-10.5648	-9.71713		-12.0201	-10.0284		-12.6503	-9.73665		-13.4823	-10.4722		-11.7719	-9.09221		-12.5563	-11.6234		-12.4455	-11.5319		-11.3862	-11.6436		-12.4603	-11.4336
-9.06908	-10.1853		-11.1146	-9.81613		-12.4561	-9.7131		-12.8949	-9.72526		-12.978	-10.0998		-12.1493	-9.31419		-12.1901	-11.5213		-12.8526	-11.7733		-11.716	-11.6285		-12.2651	-11.3948
-9.29154	-10.0406		-11.2995	-9.93051		-12.8217	-10.3182		-11.512	-9.42312		-13.0649	-10.1799		-11.7091	-9.08703		-12.9457	-11.9688		-12.3428	-11.5031		-12.0772	-11.8921		-12.3853	-10.9369
-8.65315	-9.60541		-11.1329	-9.63055		-11.5755	-9.58045		-12.0239	-10.3031		-12.2887	-9.48364		-12.5299	-9.58516		-12.787	-11.9204		-12.1857	-11.5187		-11.8623	-12.1327		-11.5102	-11.1653
-8.59868	-9.72433		-12.1923	-10.202		-12.1556	-9.78001		-12.3114	-10.0478		-12.7538	-9.54119		-12.3611	-9.46486		-12.8672	-11.8502		-12.2134	-11.6507		-12.6941	-11.9166		-11.9619	-11.7387
-8.70694	-9.4557		-12.4365	-10.0315		-11.8032	-9.73088		-12.0477	-9.82081		-12.8422	-9.43292		-11.6386	-8.94071		-12.7242	-11.6017		-12.5553	-11.7572		-12.1921	-11.6602		-12.3099	-11.3311
-9.48832	-10.0121		-11.5998	-9.72185		-12.5182	-10.0479		-12.1341	-10.1019		-13.5739	-9.6316		-12.1678	-9.07146		-12.6857	-11.5726		-12.563	-11.6231		-12.3558	-12.0523		-12.2906	-11.1851
-9.35362	-10.1688		-11.6066	-9.84453		-13.0356	-10.0887		-12.9686	-10.9895		-13.3025	-9.50586		-12.2977	-9.39311		-12.4405	-11.3712		-12.2495	-11.5529		-12.2701	-11.6973		-12.1407	-11.0544
-9.16825	-10.2961		-11.2084	-9.71829		-13.0977	-10.0557		-12.408	-9.69877		-13.3318	-9.59674		-12.3969	-9.33088		-12.0322	-11.3124		-12.2595	-11.5663		-12.4819	-11.8099		-12.2911	-11.119
-8.87725	-10.1671		-12.2184	-10.0148		-12.0701	-9.73972		-12.0738	-9.25024		-13.4942	-9.55413		-12.2665	-9.24502		-12.0827	-11.3055		-12.4838	-11.5308		-12.5125	-11.8661		-11.8235	-11.5678
-9.08211	-10.2428		-10.8513	-9.48828		-12.1712	-9.44438		-12.0492	-8.96934		-13.5291	-9.55659		-11.9493	-9.02604		-12.468	-11.2682		-12.6801	-11.5691		-11.8492	-11.4115		-11.7392	-11.2283
-9.02508	-10.1754		-10.7734	-9.29042		-11.3353	-9.25351		-12.0795	-9.20891		-12.9079	-9.2129		-11.9314	-9.01211		-12.3232	-10.9921		-11.4029	-11.1346		-11.5335	-10.9272		-11.757	-11.632
-8.71033	-9.87558		-10.6954	-9.09256		-12.3158	-9.63465		-12.913	-9.24307		-12.6793	-8.99769		-11.8574	-8.93991		-12.0552	-11.1915		-12.1124	-11.0926		-11.7869	-11.4257		-11.3713	-11.5642
-9.58689	-10.0207		-11.4771	-9.3134		-11.4222	-9.30134		-12.9118	-9.3209		-13.4514	-9.51478		-11.7256	-8.83487		-11.8323	-10.9762		-11.9984	-12.1941		-12.0337	-11.528		-11.2432	-11.1443
-10.0421	-10.2791		-12.7203	-9.45446		-12.8565	-10.2669		-11.7554	-8.89956		-13.6934	-9.80081		-11.5343	-8.68733		-12.074	-11.0561		-12.2164	-11.8863		-11.9161	-11.5996		-11.4655	-11.5378
-10.4974	-10.5375		-12.8699	-9.37187		-12.8065	-10.172		-11.2394	-9.1516		-13.4838	-9.75226		-11.4037	-8.55475		-11.8295	-11.0212		-12.2521	-12.2803		-12.1001	-11.8813		-11.4147	-11.4068
-10.2334	-10.4284		-11.7461	-9.12298		-12.7564	-10.077					-13.6993	-9.88295		-11.5221	-8.69907		-11.9865	-11.2373		-11.9879	-11.8254		-11.7213	-11.6961		-11.4098	-11.685
-10.3835	-10.2724		-11.9506	-9.66129		-12.6564	-9.88712					-13.6857	-9.86464		-11.8102	-8.8744		-11.841	-11.2443		-12.646	-11.8121		-11.4366	-11.8279		-11.4809	-11.8316
-10.1661	-10.5171		-12.1497	-9.95448		-12.5947	-9.94007					-13.6481	-9.89276		-12.1007	-9.01297		-11.8461	-11.2583		-12.9935	-11.7681		-11.091	-11.7453		-11.4485	-11.7625
-10.0264	-10.4977		-12.168	-9.96187		-12.6299	-10.1494					-13.4721	-9.77357		-11.7003	-8.77491		-11.9199	-11.5575		-11.8049	-11.2144		-11.4866	-11.6506		-11.3645	-11.5329
-9.64833	-10.3295		-12.0579	-9.88051		-13.0008	-10.3359					-13.2637	-9.64378		-11.6789	-8.54575		-11.3805	-11.3028		-11.8753	-11.5122		-11.7621	-11.6953		-11.2826	-11.2548
-8.95728	-10.0113		-12.4166	-10.0234		-13.1063	-10.496					-13.0181	-9.48601		-11.278	-8.39183		-10.301	-10.8445		-12.1921	-11.5756		-11.941	-11.2965		-11.373	-11.3554
-9.63108	-9.98526		-12.1507	-9.84781		-13.285	-10.4662					-13.171	-9.59476		-11.3804	-8.13597					-12.8256	-11.8634		-12.4076	-11.5569		-11.2759	-11.3125
-8.21096	-9.31065		-12.1036	-9.9017		-13.0191	-10.3631					-11.8045	-9.10706		-11.4232	-8.26152					-12.5391	-11.3059		-12.0499	-12.0444		-11.0853	-11.1353
-9.05538	-9.64998		-11.4995	-9.6642		-12.2209	-10.1599					-12.3138	-9.54525		-12.2596	-8.68035					-12.0037	-11.3951		-12.1654	-11.8718		-10.8946	-10.9581
-10.2344	-10.1983		-12.5741	-10.0764		-12.1583	-9.97592					-12.4611	-9.81553		-12.6779	-8.92186					-12.012	-11.2631		-12.0346	-11.5513		-11.0599	-11.3602
-10.9018	-10.7274		-12.865	-10.3401		-12.4727	-10.0837					-12.847	-10.0674		-12.637	-8.76912					-12.489	-11.3222		-12.0194	-11.6143		-11.1819	-11.232
-11.085	-10.6041		-13.347	-10.6184		-12.2986	-9.9329					-12.8393	-10.2266		-12.8387	-8.84267					-12.3956	-11.3508		-11.9352	-11.7042		-11.2094	-11.3156
-11.0285	-10.3499		-12.3464	-10.4793		-12.714	-10.2512					-12.9773	-10.2036		-11.8735	-8.22297					-12.3127	-11.0859		-11.7824	-11.6125		-11.6205	-11.0484
-11.5911	-10.7432		-11.2467	-10.3997		-12.3317	-10.1117					-12.9397	-10.1643		-11.1349	-7.83543					-12.2318	-11.2409		-12.1997	-11.7654		-11.3238	-11.0821
-11.3219	-10.665		-10.4997	-10.04		-11.717	-10.0639					-12.6036	-9.93284		-11.8091	-8.14493					-12.4314	-12.0601		-12.1058	-11.6209		-11.3087	-11.0806
-11.6324	-10.6931		-10.6529	-10.0176		-11.1022	-10.0161					-12.2432	-9.5005		-12.2646	-8.43134					-11.7777	-11.2876		-11.99	-11.2881		-11.3906	-10.9222
-11.7158	-10.7274		-12.9718	-10.3764		-11.4768	-9.97844					-12.4007	-9.58038		-12.6491	-8.66182					-11.5087	-10.7825		-12.3126	-11.1548		-11.1091	-10.6802
-12.101	-10.5829		-13.4859	-10.4296		-11.7376	-9.72453					-12.4978	-9.56504		-12.4846	-8.46314					-12.043	-11.127		-11.7605	-11.2583		-11.2276	-10.8431
-11.7631	-10.5398		-14.2206	-10.5752		-11.8593	-9.70836					-13.4367	-10.1548		-11.6608	-8.14321					-11.857	-11.0433		-11.7522	-11.3528		-11.1937	-10.7118
-10.9489	-9.56563		-13.6736	-10.3407		-12.0251	-9.5796					-13.3838	-9.99389		-11.5752	-8.28902					-12.3118	-11.1135		-11.4925	-11.4817		-11.1207	-10.7559
-10.6189	-9.82018		-13.2827	-10.4166		-12.2884	-9.81895					-13.9541	-10.1058		-11.6896	-8.25826					-11.9101	-11.1002		-11.6127	-11.5494		-11.1967	-10.7424
-10.4664	-9.70796		-13.4185	-10.4546		-12.3168	-10.112					-13.3452	-9.81356		-12.1134	-8.63851					-12.5141	-11.3506		-11.8773	-11.712		-11.2036	-10.7918
-10.7203	-10.0304		-12.9295	-10.3934		-12.3735	-10.2113					-12.9617	-9.54202		-12.7338	-8.91814					-11.5828	-11.2455		-11.874	-11.6854		-11.2086	-10.6902
-11.2569	-10.0239		-12.693	-10.3789		-12.4302	-10.3106					-13.7631	-9.96565		-12.2581	-8.70367					-11.5447	-11.3352		-12.0761	-11.7376		-10.9696	-10.6941
-12.1146	-10.5092		-12.4733	-10.2995		-12.2146	-10.1296					-13.359	-9.83711		-12.0146	-8.43302					-11.6454	-11.2584		-11.7533	-11.7178		-11.0465	-10.8365
-12.0838	-10.0626		-12.0125	-9.95641		-11.7327	-9.55763					-13.3927	-9.9292		-12.0817	-8.47365					-11.7979	-11.5438		-11.8763	-11.7913		-11.3313	-10.9598
-10.7451	-9.19595		-11.7718	-9.71819		-11.6953	-9.46366					-13.4021	-9.81237		-11.5096	-8.2989								-11.954	-11.6819		-11.0455	-11.0332
-10.8022	-9.67332		-11.5312	-9.47996		-11.6953	-9.46366					-13.1557	-9.90125		-11.6829	-8.90702								-11.9202	-11.532		-11.3951	-11.0961
-11.0438	-9.66397		-11.8293	-9.57972								-12.9216	-9.51093		-11.9918	-9.14061								-12.0984	-11.5572		-11.578	-11.2417
-11.0168	-9.83752		-12.0674	-9.7592								-13.2377	-9.67155		-12.6681	-9.54804								-11.9623	-11.5643		-11.3735	-11.2461
-10.9193	-9.9811		-12.1946	-9.75113								-13.1017	-9.61113		-12.8454	-9.42383								-11.779	-11.6952		-11.1898	-11.2891
-10.8217	-10.1247		-11.45	-9.50028								-12.6995	-9.42203		-12.5468	-9.21636								-11.3985	-11.8794		-11.5196	-11.2507
-10.7021	-9.94131		-12.6028	-9.78818								-12.5473	-9.41272		-12.4233	-9.16886								-11.4976	-12.1242		-11.2277	-11.2463
-10.1129	-9.72339		-13.0188	-10.0821								-13.0745	-9.72534		-11.6682	-8.76062								-11.5123	-12.2054		-11.0009	-11.3547
-10.1623	-9.6672		-12.6609	-9.78071								-13.2664	-9.66502		-11.7769	-8.75503								-11.7842	-12.187		-11.1617	-11.3816
-10.4238	-9.87783		-12.7517	-9.78406								-12.7889	-9.48972		-12.2534	-9.22344								-11.8266	-12.1461		-11.2627	-11.4073
-10.7714	-10.1454		-12.4078	-9.49812								-13.1056	-9.58066		-12.357	-9.00468								-12.0021	-12.2072		-11.0682	-11.4408
-10.5122	-10.0887		-12.1385	-9.35763								-13.3823	-9.64306		-12.6581	-9.10837								-11.5028	-11.8987		-11.0745	-11.4342
-9.70062	-9.66009		-12.1917	-9.28764								-13.274	-9.71317		-12.4446	-8.93417								-11.8683	-11.5975		-11.0808	-11.4275
-9.90668	-9.70269		-11.991	-8.9858								-12.8967	-9.51887		-12.1903	-8.8881								-11.5922	-11.3832		-11.1268	-11.3468
-9.28895	-9.22279		-11.9808	-9.1289								-12.8651	-9.47955		-12.1799	-8.87874								-11.7025	-11.4752		-11.1596	-11.3586
-9.90968	-9.50809		-12.2423	-9.178								-13.0194	-9.53425		-12.2941	-9.1424								-11.9736	-11.6789		-11.1676	-11.5128
-10.144	-9.94144		-12.6357	-9.51366								-12.9943	-9.62768		-11.9105	-8.78113								-12.27	-11.873		-11.1536	-11.3995
-9.88247	-9.71643		-12.865	-9.58866								-12.6488	-9.50824		-13.1989	-9.97782								-12.2891	-11.865		-11.1986	-11.5099
-9.53785	-9.68625		-13.3195	-9.89422								-12.9381	-9.59625		-13.8157	-10.2463								-12.3416	-11.8986		-11.2178	-11.319
-9.06662	-8.62747		-13.3435	-9.85233								-13.0794	-9.77725		-13.7691	-10.0153								-12.0168	-11.6092		-11.3499	-11.4122
-10.497	-9.16535		-13.402	-9.89128								-13.183	-9.75416		-13.4883	-9.7397								-11.7202	-11.3983		-11.3607	-11.5607
-10.6533	-9.43778		-13.1329	-9.65885								-13.02	-9.63176		-12.9954	-9.57856								-11.8717	-11.5269		-11.433	-11.5621
-10.291	-9.20971		-12.7436	-9.60483								-13.0106	-9.79602		-12.3025	-9.22613								-12.3247	-11.6778		-11.5518	-11.5953
-11.8856	-10.1337		-13.3109	-9.81676								-13.4489	-9.7587		-10.9716	-8.62298								-12.2179	-11.3104		-11.1491	-11.2404
-12.3297	-10.3145		-13.1485	-9.75807								-13.0956	-9.80888		-11.6246	-9.18785								-12.2076	-11.4916		-11.2224	-11.3285
-12.0581	-10.1534		-12.7739	-9.63751								-13.609	-10.0936		-12.4824	-9.82659								-11.8571	-11.5249		-11.2224	-11.3285
-12.221	-10.1714		-12.6794	-9.88238								-13.4088	-9.61999		-13.645	-10.8502								-12.4209	-11.6887		-11.4285	-11.5685
-10.608	-9.89854		-12.8491	-10.2421								-13.3523	-9.78508		-13.8838	-10.7759								-12.0904	-11.1829		-11.4195	-11.5383
-10.8173	-9.87212		-12.9445	-10.1877								-13.447	-9.77576		-13.5341	-10.1741								-12.1785	-11.2645		-11.4853	-11.6625
-9.647	-9.17106		-12.6495	-9.82856								-13.032	-9.81631		-12.8364	-9.68055								-12.3686	-11.5341		-11.2462	-11.3152
-10.1623	-9.6672		-12.7368	-9.83523								-13.5693	-9.99617		-12.8882	-9.65565								-12.186	-11.5032		-11.5642	-11.6586
-9.91394	-9.16693		-12.5321	-9.80198								-13.647	-9.76501		-12.7657	-9.38677								-11.8397	-11.7812		-11.5632	-11.7629
-11.5946	-9.52452		-13.1112	-9.86896								-14.1517	-10.1801		-12.7049	-9.36396								-12.0148	-11.3568		-11.4226	-11.4342
-11.9367	-9.66731		-12.8836	-9.80026								-13.9328	-10.1873		-13.1535	-9.35576								-12.4494	-12.0247		-11.4621	-11.4699
-11.9451	-9.82051		-13.0871	-9.79883								-13.7385	-9.99704		-12.1223	-8.94114											-11.6074	-11.4342
-12.2687	-10.0194		-12.6645	-9.71737								-14.2579	-10.1833		-13.4554	-9.91244											-11.5772	-11.4894
-12.6381	-9.71519		-13.0649	-10.0761								-14.2899	-10.0426		-13.1354	-9.77901											-11.5398	-11.1298
-12.9516	-9.90258		-12.7344	-9.89217								-14.4803	-10.1981		-13.2288	-9.85558											-11.5491	-11.0225
-12.374	-9.25268		-12.6631	-9.77157								-13.9093	-9.79098		-13.5025	-9.99069											-11.4971	-11.1734
-12.0612	-9.06805		-12.5684	-10.2247								-12.7083	-9.07527		-13.1988	-9.65471											-11.4115	-11.0175
-12.4973	-9.43875		-12.4353	-10.5546								-13.841	-9.62211		-13.2276	-9.8375											-11.5943	-11.0875
-12.7166	-9.7004		-12.7988	-10.6453								-13.4527	-9.52988		-12.7185	-9.63665											-11.6167	-11.0444
-12.7624	-9.79636		-13.0915	-10.6726								-14.2121	-9.95145		-12.0276	-9.38544											-11.3852	-10.8728
-11.7995	-9.80151		-12.7825	-10.406								-13.746	-9.61141		-12.6666	-9.76179											-11.6068	-11.2772
-12.5742	-9.95338		-12.967	-10.3506								-13.867	-9.58122		-12.8068	-9.88962											-11.747	-11.4164
-11.9834	-9.88308		-12.8931	-10.1125								-13.6054	-9.41567		-12.7243	-9.78729											-11.6491	-11.5613
-11.9756	-9.83392		-12.7643	-10.3241								-13.689	-9.58431		-12.9501	-9.84941											-11.7061	-11.6307
-11.9231	-9.84141		-12.647	-9.96939								-14.3362	-9.91835		-12.7637	-9.83755											-11.6648	-11.3771
-11.5719	-9.64403		-12.6087	-10.0416								-14.2182	-9.86556		-12.8652	-10.008											-11.3692	-11.3023
-11.4528	-9.298		-12.3812	-9.63226								-14.1002	-9.81277		-12.9604	-9.91724											-11.4597	-11.2272
-11.4761	-9.27788		-12.5974	-9.25614								-14.3206	-9.78488		-12.9262	-9.90257											-11.3146	-11.2673
-12.5801	-10.1772		-12.4437	-9.21142								-14.1138	-9.56001		-12.9162	-9.8992											-11.4632	-11.271
-12.4063	-9.99463		-12.6147	-9.28754								-14.2296	-9.78855		-13.0662	-10.0301											-11.4593	-11.2146
-12.9173	-10.4095		-12.7009	-9.30755								-12.9599	-9.20417		-12.9043	-9.86041											-11.3846	-11.1095
-12.8094	-10.4472		-12.5464	-9.36259								-13.0589	-9.0475		-12.8086	-9.90202											-11.2432	-11.1345
-12.4832	-10.2334		-12.5271	-9.44468								-13.3381	-9.39162		-12.5428	-9.78322											-11.2375	-11.3717
-12.5136	-10.0672		-12.2545	-9.3693								-13.2014	-9.34594		-12.149	-9.93464											-11.043	-11.2831
-12.413	-10.0826		-12.3589	-9.2621								-14.3413	-9.73001		-12.1869	-9.87443											-11.4047	-11.4053
-12.1589	-9.95486		-12.0648	-9.10742								-13.0359	-9.23396		-12.4648	-9.9739											-11.5138	-11.4067
-11.9048	-9.82714		-12.8232	-9.42373								-13.0376	-9.42079		-12.665	-10.0683											-11.4506	-11.4397
-12.0193	-9.73228		-12.3872	-9.18355								-12.9611	-9.49148		-12.3405	-9.94308											-11.5424	-11.2914
-12.5618	-9.82697		-12.5251	-9.20496								-12.9311	-9.28652		-12.2793	-9.88959											-11.4608	-11.3736
-12.1886	-9.65071		-12.8412	-9.34687								-13.1989	-9.28249		-12.4428	-9.92766											-11.3955	-11.3773
-13.002	-10.004		-12.6551	-9.23432								-13.0703	-9.45144		-12.3565	-9.8721											-11.3985	-11.3806
-12.8164	-9.47378		-13.2808	-9.17783								-13.0505	-9.32584		-12.6754	-10.0763											-11.4053	-11.2665
-14.1278	-10.098		-12.89	-9.11655								-12.6861	-9.07602		-12.6624	-9.83434											-11.1668	-11.2936
-14.2298	-10.0636		-12.8729	-9.39366								-12.6484	-9.07872		-12.9116	-9.9699											-11.0278	-11.5406
-13.2736	-9.56349		-13.2088	-9.7353								-12.8167	-9.1902		-12.4064	-9.56688											-11.1985	-11.5757
-12.6167	-9.36983		-13.0366	-9.49796								-13.11	-9.4472		-12.5724	-9.66601											-11.017	-11.4152
-12.7489	-9.74525		-13.4097	-9.5958								-12.8069	-9.12467		-12.6975	-9.73192											-11.3829	-11.7044
-13.0646	-10.167		-12.8815	-9.39897								-13.4353	-9.56274		-12.5047	-9.70157											-11.4302	-11.8241
-13.2145	-10.2799		-13.1684	-9.45155								-12.7218	-9.15552		-12.5516	-9.65528											-12.3104	-11.7205
-11.8583	-9.55211		-12.8863	-9.21197								-12.7713	-9.02171		-12.3862	-9.45401											-12.1541	-11.5408
-11.4672	-9.5867		-12.4028	-9.4875								-12.8585	-9.21184		-12.3403	-9.58984											-12.0254	-11.7227
-12.2825	-10.2166		-12.8875	-9.77299								-12.7538	-9.06701		-12.3734	-9.47279											-12.2025	-11.4382
-12.5495	-10.4953		-12.4164	-9.75633								-12.5445	-9.10683		-12.376	-9.27798											-12.0807	-11.1471
-13.0129	-10.7517		-12.4973	-9.62287								-12.8692	-9.04868		-12.5261	-9.37316											-12.4398	-11.3973
-13.5849	-11.1016		-12.2346	-9.67536								-12.7261	-8.94896		-12.6601	-9.43924											-11.8991	-11.0954
-12.5853	-10.3212											-12.8229	-9.26615		-12.6949	-9.39195											-11.8165	-11.0816
-11.6255	-9.64266											-12.9409	-9.04644		-12.9284	-9.19783											-11.8315	-11.1155
-11.4266	-9.59368											-12.7876	-8.8554		-12.8106	-9.0313											-11.9226	-11.129
-11.762	-9.47371											-13.0356	-9.01348		-12.6468	-9.0815											-12.1512	-11.3206
-12.8189	-9.63842											-12.4816	-8.72221		-12.6881	-9.00373											-12.1829	-11.2368
-12.9324	-9.49938											-12.7068	-8.91958		-12.5113	-9.11913											-11.9515	-11.009
-13.2574	-9.54507											-12.6544	-8.90614		-12.5948	-8.99349											-11.8107	-11.0141
-12.2733	-9.28253											-12.8747	-9.03811		-12.9964	-9.03702											-11.8764	-10.8798
-12.4842	-9.16275											-12.4269	-8.94946		-12.4653	-8.72913											-11.9576	-10.8846
-11.7807	-9.07195											-13.2697	-9.19662		-12.3863	-8.78646											-12.0935	-10.8588
-12.3592	-9.36148											-13.7429	-9.20488		-12.406	-8.79368											-12.1452	-10.8584
-12.7407	-9.41267											-13.7595	-9.13668		-12.496	-9.01864											-11.924	-10.6956
-11.6375	-8.80492											-13.448	-9.12928		-13.3271	-9.32381											-11.5521	-10.8462
-12.3058	-9.17658											-12.7043	-9.02145		-12.7864	-9.00922											-11.4725	-10.829
-12.7365	-9.57353											-12.6566	-8.96447		-13.1101	-9.11362											-10.307	-10.7642
-12.9292	-9.69478											-12.2988	-9.27777		-13.1137	-9.02176
-13.3976	-9.69025											-12.9594	-9.7913		-12.6831	-9.24158
-13.0708	-9.38218											-12.9241	-9.85		-12.385	-9.4807
-13.1319	-9.61564											-13.0426	-9.74167		-12.363	-9.43552
-11.907	-8.87288											-12.9893	-9.76057		-12.6858	-9.73049
-12.4112	-9.12691											-12.8874	-9.64608		-12.2801	-9.55726
												-13.171	-9.75742		-12.2483	-9.73706
												-12.3708	-9.51689		-12.2329	-9.85233
												-12.246	-9.61545		-12.4092	-9.86117
												-12.8915	-10.3752		-12.8717	-10.3005
												-12.925	-10.2599		-12.5201	-9.97461
												-13.5138	-10.6742		-12.6604	-10.3255
												-14.0429	-10.9068		-12.824	-10.4053
												-13.8961	-10.6415		-12.8778	-10.3137
												-13.9063	-10.4167		-12.4438	-10.2821
												-13.6668	-10.36		-12.5632	-10.2323
												-14.0313	-10.5314		-12.398	-10.2776
												-13.4812	-9.90935		-12.2384	-10.2282
												-12.7421	-9.58107		-12.3088	-10.4041
												-11.5329	-9.45483		-12.1301	-10.2096
												-11.8923	-9.69242		-12.1361	-10.3528
												-12.8557	-10.3124		-11.9158	-10.241
												-12.8345	-10.3485		-12.0973	-10.4669
												-12.765	-10.4676		-12.5072	-10.476
												-13.0162	-10.4415		-12.639	-10.448
												-13.1005	-10.3345		-12.5645	-10.1812
												-13.2327	-10.4032		-12.5468	-10.0863
												-12.9117	-10.3295		-12.4754	-9.99434
												-12.4301	-10.0925		-12.3418	-9.85475
												-11.8935	-9.77847		-12.5043	-10.0062
												-12.7958	-10.1362		-12.4179	-10.1366
												-13.5618	-10.4692		-12.6548	-10.1857
												-13.6224	-10.4587		-12.4084	-10.0576
												-13.7622	-10.2523		-13.2897	-10.2158
												-13.1717	-10.0179		-13.1145	-10.1952
												-13.2454	-9.9432		-13.0224	-10.0286
												-12.6381	-9.70012		-12.9718	-9.95504
												-13.2819	-10.2694		-12.2154	-9.58775
												-13.3189	-9.9991		-12.5396	-9.93562
												-13.21	-10.0097		-12.8526	-10.149
												-13.465	-10.097		-12.7273	-9.94928
												-13.2254	-9.94665		-12.5929	-9.93676
												-13.6387	-10.2279		-13.1557	-9.8995
												-13.2057	-10.0244		-13.0495	-9.79973
												-12.9584	-9.85558		-12.7544	-9.89111
												-12.6945	-9.90436		-12.9879	-9.74702
												-12.6648	-9.74017		-12.7337	-9.81149
												-12.7338	-9.77222		-12.7539	-9.86739
												-13.0561	-9.99603		-12.8285	-9.76248
												-12.9206	-9.71499		-12.6984	-9.79483
												-12.857	-9.50986		-12.419	-9.64925
												-12.9534	-9.53172		-12.4854	-9.61734
												-12.6676	-9.33209		-12.79	-8.59933
												-12.4877	-9.42673		-12.6938	-9.69602
												-12.9178	-9.44621		-13.057	-9.72162
												-12.977	-9.43913		-13.0407	-9.83027
												-13.4102	-9.57743		-13.2764	-9.70679
												-13.6278	-9.72768		-12.9793	-9.48436
												-13.6655	-9.64941		-12.0656	-9.03562
												-13.6258	-9.44773		-12.3879	-9.2596
												-13.8233	-9.73004		-13.3232	-9.74531
												-14.0353	-9.83265		-13.0809	-9.39532
												-13.7981	-9.71577		-12.9851	-9.41298
												-14.3793	-9.93787		-12.8132	-9.4145
												-14.4784	-10.0424		-12.7381	-9.47943
												-14.1905	-9.64382		-12.6478	-9.57945
												-13.6576	-9.45348		-13.1982	-9.68495
												-14.2979	-9.68874		-13.3059	-9.50319
												-13.8049	-9.4781		-12.8973	-9.4989
												-13.1398	-9.38769		-12.9923	-9.48171
												-13.4032	-9.29728		-12.6109	-9.43701
												-14.2128	-9.7092		-12.6111	-9.27593
												-13.6961	-9.66774		-12.598	-9.27056
												-14.3078	-9.6806		-12.4747	-9.22587
												-14.0075	-9.69392		-12.283	-9.08324
												-14.0321	-9.64394		-12.2879	-9.02154
												-14.7647	-9.87311		-12.3134	-9.0051
												-14.3445	-9.71584		-12.1829	-8.93032
												-14.1563	-9.55936		-11.9209	-8.9046
												-14.2101	-9.54807		-11.9489	-9.05329
												-13.7142	-9.63871		-12.3988	-9.3016
												-13.3962	-9.57763		-12.0344	-9.06008
												-13.5062	-9.55962		-12.0744	-9.29624
												-13.3734	-9.40383		-12.1124	-9.32642
												-13.414	-9.43655		-12.0053	-9.52761
												-13.9714	-9.61219		-12.1052	-9.60327
												-13.7929	-9.36834		-12.035	-9.68449
												-13.4064	-9.26845		-11.9505	-9.47925
												-13.1911	-9.22576		-11.8602	-9.61045
												-13.0408	-9.17868		-11.9512	-9.81593
												-13.1682	-9.38417		-12.185	-9.89761
												-12.7592	-9.07161		-11.8246	-9.7692
												-12.6415	-8.9748		-12.1116	-10.1244
												-12.7013	-8.94692		-12.6998	-9.90116
												-12.6186	-8.85894		-12.2248	-9.61457
												-12.7	-9.02844		-11.8935	-9.77473
												-12.6197	-8.90375		-12.1554	-10.0324
												-12.553	-8.95984		-12.0054	-9.75102
												-12.2908	-8.72516		-11.7297	-9.75379
												-12.5572	-8.93881		-12.473	-9.77415
												-12.4647	-8.86097		-12.2262	-9.88701
												-12.6929	-8.94717		-12.629	-9.97636
												-13.014	-8.80805		-11.8862	-9.53753
												-12.9736	-8.74664		-12.1035	-9.56719
												-12.7199	-8.67737		-12.3795	-9.71345
												-11.829	-8.76001		-12.8647	-9.78604
												-11.988	-9.09451		-12.9213	-9.75569
												-12.189	-9.47611		-12.7456	-9.59119
												-12.9762	-9.61887		-12.4715	-9.6705
												-13.0464	-9.53275		-12.3849	-9.72809
												-13.1656	-9.44048		-12.2821	-9.62373
												-13.9085	-9.70316		-12.0242	-9.49966
												-13.9665	-9.63305		-12.2762	-9.72097
												-13.6475	-9.68592		-12.6488	-9.64607
												-12.6759	-9.24889		-12.3316	-9.67643
												-11.8352	-9.01374		-12.485	-9.68188
												-12.294	-9.36547		-12.6218	-9.60501
												-12.907	-9.60029		-12.3337	-9.59381
												-12.8764	-9.37662		-12.4014	-9.58731
												-12.7585	-9.39047		-12.3787	-9.73153
												-11.5901	-9.36306		-12.5257	-9.6844
												-12.0716	-9.9696		-12.5228	-9.71377
												-12.4498	-10.2739		-12.3221	-9.58368
												-13.0854	-10.1087		-12.366	-9.6398
												-12.8153	-9.91155		-12.5585	-9.595
												-12.4405	-9.76403		-12.4445	-9.69211
												-12.4441	-10.0303		-12.2005	-9.58253
												-12.7266	-10.0992		-12.1423	-9.41768
												-12.8456	-9.86763		-12.318	-9.54362
												-12.7331	-9.83483		-12.0914	-9.63471
												-12.5525	-9.74314		-12.1579	-9.3297
												-12.4339	-9.77651		-12.2273	-9.39175
												-12.5525	-9.8454		-12.2615	-9.24494
												-12.8354	-9.79661		-12.1613	-9.41444
												-12.8745	-9.92806		-12.2221	-9.29567
												-12.6665	-9.76076		-12.182	-9.44666
												-13.0315	-10.0643		-12.0994	-9.27871
												-12.5245	-9.84601		-12.1827	-9.28631
												-12.6275	-9.8304		-12.155	-9.27266
												-12.4157	-9.8968		-11.9827	-9.10623
												-12.4261	-9.71484		-12.0993	-9.15507
												-12.3898	-9.77808		-11.9949	-9.15541
												-12.4527	-9.77727		-12.0576	-9.20422
												-12.7551	-9.8374		-12.1771	-9.30221
												-12.7925	-9.98187		-12.0471	-9.16491
												-12.8361	-9.935		-11.9898	-9.34031
												-12.6175	-9.79884
												-12.7853	-9.88066
												-12.9301	-9.95008
												-13.0354	-9.71402
												-13.0606	-9.77479
												-13.0716	-9.79217
												-12.8283	-9.70652
												-12.9339	-9.70249
												-13.2037	-9.7404
												-13.3905	-9.92439
												-13.3402	-9.73629
												-13.8017	-9.77949
												-13.7633	-9.27233
												-13.5884	-9.77547
												-13.52	-9.70589
												-13.4464	-9.50202
												-13.558	-9.75181
												-13.6376	-9.8597
												-13.8205	-9.61142
												-13.9254	-9.7568
												-13.103	-9.5126
												-12.9313	-9.60434
												-12.8407	-9.61253
												-12.9385	-9.54838
												-12.9921	-9.71965
												-13.107	-9.6657
												-12.8423	-9.60406
												-12.855	-9.63835
												-13.2824	-9.98176
												-13.4918	-9.93487
												-13.5485	-10.0875
												-14.1054	-10.3702
												-13.5889	-10.0415
												-13.767	-10.0693
												-13.3225	-9.89528
												-13.4545	-9.87221
												-12.9754	-9.52041
												-12.7335	-9.47172
												-12.8754	-9.41475
												-12.8393	-9.48895
												-12.8506	-9.37149
												-12.7244	-9.09362
												-12.6533	-9.17116
												-12.6431	-9.17813
												-12.7527	-9.23876
												-12.7495	-9.22065
												-12.7396	-9.20829
												-12.9727	-9.39193
												-12.8222	-9.28254
												-12.5	-9.08729
												-12.4696	-9.08417
												-13.1955	-9.30742
												-13.338	-9.44968

## Sheet: Annual isotope data
		ED-NJB-A6R			arithmetic average		weighted average			Tw	Tw from SGI			ED-NJB-A4R			arithmetic average		weighted average			Tw	Tw from SGI			ED-NJB-A4R			arithmetic average		weighted average			Tw	Tw from SGI			ED-NJB-A3R			arithmetic average		weighted average			Tw	Tw from SGI
	cal yr AD	ontogen. yr	incr. width (px)	SGI	δ13Cs (‰)	δ18Os (‰)	δ13Cs* (‰)	δ18Os* (‰)	δ13Cs(d)* (‰)	δ18Owr* (‰)	δ18Owr(SGI)* (‰)		cal yr AD	ontogen. yr	incr. width (px)	SGI	δ13Cs (‰)	δ18Os (‰)	δ13Cs* (‰)	δ18Os* (‰)	δ13Cs(d)* (‰)	δ18Owr* (‰)	δ18Owr(SGI)* (‰)		cal yr AD	ontogen. yr	incr. width (px)	SGI	δ13Cs (‰)	δ18Os (‰)	δ13Cs* (‰)	δ18Os* (‰)	δ13Cs(d)* (‰)	δ18Owr* (‰)	δ18Owr(SGI)* (‰)		cal yr AD	ontogen. yr	incr. width (px)	SGI	δ13Cs (‰)	δ18Os (‰)	δ13Cs* (‰)	δ18Os* (‰)	δ13Cs(d)* (‰)	δ18Owr* (‰)	δ18Owr(SGI)* (‰)		cal yr AD
	1972	1	451.9	0.63898	-8.53209	-9.85864	-8.5078	-9.81402	0.65724				1967	1	222.936	-0.761514									1946	1	228.679	0.513075									1970	1	211.574	0.0619678	-13.1505	-10.5345	-13.3971	-10.531	2.35022	-13.0622	-13.1571		1943
	1973	2	346.296	-1.08648	-8.62181	-9.82572	-8.65353	-9.81574	0.289883	-12.5401	-12.4001		1968	2	287.845	0.54603	-8.79089	-10.279	-8.82368	-10.292	-1.88837	-13.17	-12.8456		1947	2	230.919	0.524641	-9.8664	-10.1592	-9.91345	-10.136	-0.189448	-12.4886	-12.3852		1971	2	224.381	0.357759	-12.3081	-10.1315	-12.1845	-10.0758	0.284074	-12.8833	-12.7462		1944
	1974	3	436.317	-0.182034	-8.85554	-10.1697	-8.83138	-10.1242	0.377629	-12.7067	-12.6577		1969	3	327.325	1.44004	-9.19796	-10.401	-9.30553	-10.3804	-1.28671	-12.8494	-12.9016		1948	3	100.571	-2.16399	-11.1728	-9.58932	-11.1204	-9.58652	2.41697	-12.3471	-12.1144		1972	3	178.696	-0.528059	-11.3499	-9.80114	-11.3499	-9.80114	-1.134	-12.3315	-12.2408		1945
	1975	4	487.92	0.171511	-8.54591	-9.63041	-8.64828	-9.59755	-1.31113	-12.3389	-12.1775		1970	4	291.75	0.916126	-9.49802	-10.0817	-9.4842	-10.0096	-1.59907	-12.5407	-12.6356		1949	4	206.721	-0.0501938	-10.1577	-9.15182	-10.1327	-9.14768	-0.242356	-11.8007	-11.838		1973	4	195.809	-0.144509	-11.6009	-9.67356	-11.6009	-9.67356	-0.675269	-12.398	-12.2579		1946
	1976	5	356.617	-1.59855	-9.30949	-9.62782	-9.26129	-9.65502	0.28034	-12.4748	-12.2677		1971	5	152.701	-1.71917	-10.7696	-9.75475	-10.8284	-9.77081	1.4204	-12.5783	-12.4412		1950	5	217.526	0.120265	-10.6807	-9.17594	-10.6207	-9.15562	0.616423	-11.7224	-11.7349		1974	5	205.647	0.0954862	-12.8075	-10.2241	-12.8468	-10.2145	1.50862	-12.797	-12.748		1947
	1977	6	397.611	-1.32196	-8.96637	-9.97233	-8.95105	-9.98518	-1.60573	-12.822	-12.5853		1972	6	229.046	-0.054205	-10.8997	-10.0082	-10.8639	-9.99938	0.695793	-12.5297	-12.439		1951	6	204.798	-0.168154	-10.1559	-9.73911	-10.1077	-9.78712	-0.866514	-12.5158	-12.4454		1975	6	188.198	-0.229165	-11.329	-10.0023	-11.314	-10.049	-1.13795	-12.7904	-12.6289		1948
	1978	7	633.106	1.013	-9.67449	-10.1721	-9.54795	-10.1102	-0.445822	-12.8782	-12.4988		1973	7	178.813	-0.989385	-10.8115	-9.81158	-10.8631	-9.79787	-0.0551002	-12.5223	-12.3822		1952	7	256.482	0.829967	-9.70527	-9.28578	-9.76616	-9.2469	-1.92835	-12.2284	-11.8851		1976	7	120.329	-1.62099	-11.1823	-9.90727	-11.2616	-9.95693	-1.21925	-12.7767	-12.5697		1949
	1979	8	722.347	1.77805	-10.8915	-10.3352	-10.9477	-10.3004	2.00604	-12.9987	-12.6401		1974	8	182.209	-0.811022	-11.6961	-9.85811	-11.6391	-9.83525	1.30785	-12.4177	-12.3687		1953	8	226.142	0.245031	-10.7182	-9.47787	-10.6511	-9.44427	-0.200269	-11.8697	-11.9911		1977	8	121.392	-1.57366	-11.7226	-10.2456	-11.7226	-10.2456	-0.413914	-13.0824	-12.8456		1950
	1980	9	689.705	1.38358	-10.9085	-9.84551	-10.8394	-9.83094	1.08611	-12.2783	-12.2527		1975	9	183.962	-0.665197	-11.1494	-9.52088	-11.0683	-9.46307	-0.803141	-12.2044	-12.043		1954	9	210.644	-0.01625	-10.834	-9.78496	-10.7255	-9.77367	-0.330923	-12.4347	-12.4191		1978	9	217.457	0.517795	-11.4062	-9.46905	-11.3579	-9.44571	-1.05063	-12.2137	-11.8342		1951
	1981	10	492.517	-0.600943	-9.94222	-9.6537	-9.86322	-9.58037	-2.33177	-12.3331	-12.1623		1976	10	203.441	-0.109181	-11.9018	-9.27105	-11.9254	-9.25979	0.814043	-12.0795	-11.8725		1955	10	270.482	1.28098	-10.7286	-10.4715	-10.7166	-10.3991	-0.648456	-13.0584	-13.027		1979	10	266.619	1.6456	-11.7383	-9.98091	-11.7934	-10.0128	-0.302042	-12.7111	-12.3525		1952
	1982	11	518.042	-0.235643	-10.9159	-9.65046	-10.846	-9.64386	-0.669133	-12.4358	-12.2843		1977	11	160.804	-0.994955	-12.027	-9.7798	-11.9965	-9.77274	0.477146	-12.6096	-12.3728		1956	11	251.011	1.03845	-10.7103	-9.68221	-10.821	-9.74544	-0.71736	-12.5516	-12.4339		1980	11	256.134	1.50219	-12.2329	-9.75125	-12.1091	-9.65668	0.232385	-12.1041	-12.0784		1953
	1983	12	476.996	-0.520603	-11.5903	-9.54322	-11.6799	-9.52022	0.169375	-12.2515	-12.0554		1978	12	177.159	-0.502369	-11.8789	-10.2045	-11.722	-10.1863	-0.64046	-12.9543	-12.5749		1957	12	185.379	-0.180935	-10.133	-9.76309	-10.133	-9.76309	-2.49142	-12.6227	-12.5017		1981	12	211.05	0.592698	-11.5795	-9.67246	-11.488	-9.6174	-0.863913	-12.3702	-12.1994		1954
	1984	13	539.151	0.372673	-12.1198	-9.6599	-12.0374	-9.63603	0.682875	-12.3432	-12.2816		1979	13	213.527	0.51071	-13.001	-10.3479	-13.0919	-10.3518	2.28323	-13.0501	-12.6915		1958	13	160.451	-0.562061	-11.0805	-10.194	-11.1269	-10.2151	-0.653724	-12.8989	-12.9087		1982	13	206.107	0.583744	-11.7865	-9.52752	-11.8057	-9.54593	-0.333374	-12.3379	-12.1864		1955
	1985	14	477.719	-0.0704182	-12.3211	-9.99425	-12.3157	-9.99767	0.527488	-12.7201	-12.5159		1980	14	257.203	1.76427	-12.6429	-10.1598	-12.516	-10.0933	0.559365	-12.5407	-12.515		1959	14	170.514	-0.140973	-11.7082	-10.1831	-11.7082	-10.1831	0.276987	-12.79	-12.7173		1983	14	206.319	0.710914	-12.371	-9.43761	-12.387	-9.46004	0.650997	-12.1913	-11.9952		1956
	1986	15	378.176	-1.00509	-12.8091	-9.7786	-12.8489	-9.74074	1.18584	-12.4837	-12.3321		1981	15	197.324	0.378204	-11.8145	-9.61406	-11.7906	-9.60854	-1.43292	-12.3613	-12.1905		1960	15	151.969	-0.399683	-12.0201	-10.0284	-12.0201	-10.0284	0.635424	-12.615	-12.3861		1984	15	220.984	1.21073	-12.8949	-9.72526	-12.8949	-9.72526	1.50648	-12.4324	-12.3709		1957
	1987	16	320.807	-1.48365	-12.7006	-9.82281	-12.6359	-9.8123	0.629029	-12.6816	-12.5754		1982	16	147.65	-0.809732	-12.3571	-9.56272	-12.3056	-9.49865	-0.448047	-12.2906	-12.1391		1961	16	142.684	-0.456936	-12.4561	-9.7131	-12.4561	-9.7131	1.25323	-12.2394	-12.2649		1985	16	141.96	-0.593365	-11.768	-9.86309	-11.8055	-9.92768	-0.398789	-12.6501	-12.4459		1958
	1988	17	478.515	0.982176	-12.2155	-10.0735	-12.1658	-10.0171	-0.649998	-12.4987	-12.2035		1983	17	187.692	0.424984	-12.7656	-9.52965	-12.8006	-9.55201	0.515448	-12.2833	-12.0872		1962	17	127.243	-0.711521	-12.089	-9.85239	-12.0712	-9.84384	0.211218	-12.7887	-12.5643		1986	17	137.927	-0.56834	-12.1796	-9.93432	-12.1602	-9.91765	0.194978	-12.6606	-12.509		1959
	1989	18	413.993	0.515093	-12.4585	-9.37941	-12.4113	-9.36136	-0.219054	-12.0386	-11.8069		1984	18	176.381	0.269389	-12.9942	-9.70429	-12.9677	-9.69605	0.748893	-12.4032	-12.3416		1963	18	156.491	0.264548	-12.5182	-10.0479	-12.5182	-10.0479	0.880956	-12.5946	-12.5231		1987	18	117.905	-0.968039	-12.4122	-10.5457	-12.5078	-10.2177	0.778257	-13.087	-12.9808		1960
	1990	19	336.656	-0.19386	-12.2458	-9.19302	-12.1865	-9.15185	-0.789228	-11.7034	-11.5493		1985	19	161.818	0.0101073	-12.8102	-9.87281	-12.8022	-9.84619	0.25121	-12.5686	-12.3644		1964	19	127.098	-0.449624	-13.0356	-10.0887	-13.0356	-10.0887	1.70272	-13.0018	-12.8124		1988	19	169.77	0.62693	-12.408	-9.69877	-12.408	-9.69877	0.592626	-12.1804	-11.8852		1961
	1991	20	404.419	1.61385	-12.6796	-9.38704	-12.7406	-9.40408	0.0868433	-12.0726	-11.6672		1986	20	132.592	-0.715512	-12.7817	-9.86429	-12.7623	-9.8507	0.0777303	-12.5936	-12.4421		1965	20	130.577	-0.234206	-13.0977	-10.0557	-13.0977	-10.0557	1.63694	-12.7777	-12.6209		1989	20	120.302	-0.614185	-12.0738	-9.25024	-12.0738	-9.25024	0.00636748	-11.9275	-11.6958		1962
	1992	21	270.604	-0.169687	-12.5195	-9.24426	-12.618	-9.24908	0.0431812	-11.9843	-11.6437		1987	21	94.2062	-1.78573	-12.775	-10.3422	-12.8019	-10.3252	0.11404	-13.1946	-13.0883		1966	21	96.7131	-1.19303	-12.5839	-9.89772	-12.5085	-9.87453	0.317641	-12.5959	-12.4272		1990	21	81.4656	-1.64318	-12.0643	-9.08913	-12.0665	-9.10671	-0.0130958	-11.6583	-11.5042		1963
	1993	22	151.21		-12.1591	-8.9999	-12.1961	-10.4101					1988	22	192.203	1.58239	-12.6193	-9.79249	-12.6022	-9.72457	-0.376477	-12.2062	-11.911		1967	22	158.838	0.849872	-11.7532	-9.34894	-11.6919	-9.33493	-1.40823	-11.9946	-11.9012		1991	22	147.545	0.621348	-12.9124	-9.28198	-12.9123	-9.2877	1.43915	-11.9562	-11.5508		1964
													1989	23	115.589	-0.79586	-12.4389	-9.29408	-12.4037	-9.28194	-0.847706	-11.9592	-11.7275		1968	23	136.11	0.221866	-11.869	-9.468	-11.8034	-9.44353	-1.291	-12.3216	-11.9971		1992	23	162.924	1.39895	-11.7554	-8.89956	-11.7554	-8.89956	-0.555957	-11.7002	-11.3596		1965
													1990	24	161.62	1.04574	-12.6834	-9.2244	-12.724	-9.2166	-0.120415	-11.7681	-11.6141		1969	24	154.549	0.95195	-12.8565	-10.2669	-12.8565	-10.2669	0.670969	-12.7359	-12.7881		1993	24	75.3096	-1.44262	-11.2394	-9.1516	-11.2394	-9.1516					1966
													1991	25	168.332	1.58115	-13.0443	-9.42522	-13.0381	-9.4058	0.601352	-12.0743	-11.6689		1970	25	148.699	0.91633	-12.8065	-10.172	-12.8065	-10.172	0.508332	-12.7031	-12.798														1967
													1992	26	126.48	0.244695	-12.6181	-9.57033	-12.6107	-9.58273	-0.368086	-12.3834	-12.0428		1971	26	140.459	0.824951	-12.7564	-10.077	-12.7564	-10.077	0.368067	-12.8845	-12.7474														1968
													1993	27	47.5503		-12.3659	-9.64912	-15.5993	-12.0131					1972	27	122.613	0.392174	-12.6564	-9.88712	-12.6564	-9.88712	0.152879	-12.4174	-12.3267														1969
																									1973	28	98.659	-0.313216	-12.5947	-9.94007	-12.5947	-9.94007	0.0325386	-12.6645	-12.5244														1970
																									1974	29	108.543	0.308724	-12.8154	-10.2427	-12.8426	-10.2563	0.529181	-12.8388	-12.7898														1971
																									1975	30	79.5486	-0.72528	-13.1957	-10.4811	-13.2088	-10.4789	1.27477	-13.2203	-13.0588														1972
																									1976	31	42.3764	-2.26828	-13.0191	-10.3631	-13.0191	-10.3631	0.963887	-13.1829	-12.9759														1973
																									1977	32	99.6425	0.514831	-12.1896	-10.0679	-12.185	-10.0544	-0.585924	-12.8913	-12.6545														1974
																									1978	33	86.6331	0.00227426	-12.3857	-10.0083	-12.3729	-9.99724	-0.141622	-12.7653	-12.3858														1975
																									1979	34	83.6813	-0.0777151	-12.714	-10.2512	-12.714	-10.2512	0.61356	-12.9495	-12.5909														1976
																									1980	35	45.592	-1.94311	-12.0243	-10.0878	-11.9792	-10.0843	-0.734246	-12.5317	-12.506														1977
																									1981	36	73.0054	-0.584773	-11.1022	-10.0161	-11.1022	-10.0161	-2.37157	-12.7688	-12.598														1978
																									1982	37	90.3926	0.261177	-11.6072	-9.85149	-11.6263	-9.83285	-1.24854	-12.6248	-12.4733														1979
																									1983	38	115.426	1.49517	-11.9422	-9.64398	-11.9544	-9.63453	-0.508031	-12.3658	-12.1697														1980
																									1984	39	118.42	1.6894	-12.2884	-9.81895	-12.2884	-9.81895	0.249481	-12.5261	-12.4645														1981
																									1985	40	107.923	1.27237	-12.3168	-10.112	-12.3168	-10.112	0.401095	-12.8344	-12.6302														1982
																									1986	41	77.6518	-0.138696	-12.3735	-10.2113	-12.3735	-10.2113	0.61286	-12.9542	-12.8027														1983
																									1987	42	31.8544	-2.46702	-12.4302	-10.3106	-12.4302	-10.3106	0.829082	-13.1799	-13.0737														1984
																									1988	43	106.474	1.92073	-12.2146	-10.1296	-12.2146	-10.1296	0.498028	-12.6112	-12.316														1985
																									1989	44	75.039	0.396432	-11.7327	-9.55763	-11.7327	-9.55763	-0.375737	-12.2349	-12.0032														1986
																									1990	45	60.595	-0.191414	-11.6953	-9.46366	-11.6953	-9.46366	-0.346807	-12.0152	-11.8611														1987
																									1991	46	54.5545	-0.247535	-11.6953	-9.46366	-11.6953	-9.46366	-0.240216	-12.1322	-11.7267														1988
																									1992	47	62.9363	0.870024	-11.6953	-9.46366	-11.6953	-9.46366	-0.132496	-12.2643	-11.9237														1989
																									1993	48	23.9997	-2.02063	-11.6953	-9.46366	-11.6953	-9.46366																	1990
																																																	1991
																																																	1992
																																																	1993
[truncated: 65 more columns]

## Sheet: Data for weighted avergage calc
Absolute and relative daily growth rate during the main growing season, time…								Time interval covered by nth isotope sample of annual increment
#day of growing season	Date	daily incr width (µm)	cumul time (%) passed	daily increment width (%)	cumaltive increment width (%)			#isotope samples per annual increment	1st	2nd	3rd	4th	5th	6th	7th	8th	9th	10th	11th	12th	13th	14th	15th	16th
1	1992-05-23	1.40351	0.699301	0.747017	0.747017			1	23May-12Oct
2	1992-05-24	1.28655	1.3986	0.684765	1.43178			2	23May-22Jul	23Jul-12Oct
3	1992-05-25	1.40351	2.0979	0.747017	2.1788			3	23May-1Jul	2Jul-15Aug	16Aug-12Oct
4	1992-05-26	1.40351	2.7972	0.747017	2.92582			4	23May-23Jun	24Jun-22Jul	23Jul-26Aug	27Aug-12Oct
5	1992-05-27	1.40351	3.4965	0.747017	3.67283			5	23May-17Jun	18Jun-9Jul	10Jul-5Aug	6Aug-3Sep	4Sep-12Oct
6	1992-05-28	1.40351	4.1958	0.747017	4.41985			6	23May-13Jun	14Jun-1Jul	2Jul-22Jul	23Jul-15Aug	16Aug-10Sep	11Sep-12Oct
7	1992-05-29	1.05263	4.8951	0.560262	4.98011			7	23May-10Jun	11Jun-27Jun	28Jun-13Jul	14Jul-1Aug	2Aug-21Aug	22Aug-12Sep	13Sep-12Oct
8	1992-05-30	1.28655	5.59441	0.684765	5.66488			8	23May-8Jun	9Jun-23Jun	24Jun-6Jul	7Jul-22Jul	23Jul-9Aug	10Aug-26Aug	27Aug-16Sep	17Sep-12Oct
9	1992-05-31	1.16959	6.29371	0.622514	6.28739			9	23May-6Jun	7Jun-20Jun	21Jun-1Jul	2Jul-14Jul	15Jul-29Jul	30Jul-15Aug	16Aug-30Aug	31Aug-18Sep	19Sep-12Oct
10	1992-06-01	1.16959	6.99301	0.622514	6.9099			10	23May-5Jun	6Jun-17Jun	18Jun-28Jun	29Jun-9Jul	10Jul-22Jul	23Jul-5Aug	6Aug-19Aug	20Aug-3Sep	4Sep-20Sep	21Sep-12Oct
11	1992-06-02	1.28655	7.69231	0.684765	7.59467			11	23May-4Jun	5Jun-15Jun	16Jun-26Jun	27Jun-4Jul	5Jul-15Jul	16Jul-27Jul	28Jul-10Aug	11Aug-22Aug	23Aug-6Sep	7Sep-21Sep	22Sep-12Oct
12	1992-06-03	1.40351	8.39161	0.747017	8.34169			12	23May-3Jun	4Jun-13Jun	14Jun-23Jun	24Jun-1Jul	2Jul-11Jul	12Jul-22Jul	23Jul-3Aug	4Aug-15Aug	16Aug-26Aug	27Aug-10Sep	11Sep-23Sep	24Sep-12Oct
13	1992-06-04	1.99181	9.09091	1.06014	9.40183			13	23May-2Jun	3Jun-11Jun	12Jun-21Jun	22Jun-29Jun	30Jun-7Jul	8Jul-16Jul	17Jul-27Jul	28Jul-8Aug	9Aug-18Aug	19Aug-29Aug	30Aug-12Sep	13Sep-24Sep	25Sep-12Oct
14	1992-06-05	1.87485	9.79021	0.99789	10.3997			14	23May-2Jun	3Jun-10Jun	11Jun-19Jun	20Jun-27Jun	28Jun-4Jul	5Jul-13Jul	14Jul-22Jul	23Jul-1Aug	2Aug-11Aug	12Aug-22Aug	23Aug-31Aug	1Sep-13Sep	14Sep-25Sep	26Sep-12Oct
15	1992-06-06	1.19298	10.4895	0.634964	11.0347			15	23May-31May	1Jun-9Jun	10Jun-17Jun	18Jun-25Jun	26Jun-1Jul	2Jul-9Jul	10Jul-17Jul	18Jul-27Jul	28Jul-5Aug	6Aug-15Aug	16Aug-24Aug	25Aug-3Sep	4Sep-15Sep	16Sep-26Sep	27Sep-12Oct
16	1992-06-07	1.22105	11.1888	0.649904	11.6846			16	23May-31May	1Jun-8Jun	9Jun-16Jun	17Jun-23Jun	24Jun-29Jun	30Jun-6Jul	7Jul-14Jul	15Jul-22Jul	23Jul-31Jul	1Aug-7Aug	8Aug-18Aug	19Aug-26Aug	27Aug-6Sep	7Sep-16Sep	17Sep-27Sep	28Sep-12Oct
17	1992-06-08	1.67485	11.8881	0.89144	12.576
18	1992-06-09	1.04561	12.5874	0.556527	13.1326			Number of days represented by nth isotope sample of annual increment
19	1992-06-10	1.33333	13.2867	0.709666	13.8422			#isotope samples per annual increment	1st	2nd	3rd	4th	5th	6th	7th	8th	9th	10th	11th	12th	13th	14th	15th	16th
20	1992-06-11	1.87485	13.986	0.99789	14.8401			1	143
21	1992-06-12	2.22222	14.6853	1.18278	16.0229			2	61.0038	81.9962
22	1992-06-13	1.78947	15.3846	0.952446	16.9753			3	39.9971	45.0021	58.0008
23	1992-06-14	0.701754	16.0839	0.373508	17.3488			4	32.0034	29.0004	34.9921	47.0041
24	1992-06-15	1.56023	16.7832	0.830433	18.1793			5	25.9974	22.0077	26.9984	28.9861	39.0104
25	1992-06-16	1.75789	17.4825	0.935638	19.1149			6	21.9934	18.0037	21.0067	23.9954	25.9974	32.0034
26	1992-06-17	1.42339	18.1818	0.757599	19.8725			7	19.0047	16.9884	16.0017	19.0047	20.0057	22.9944	29.0004
27	1992-06-18	1.17544	18.8811	0.625626	20.4981			8	16.5737	15.4297	12.9987	16.0017	17.9894	17.0027	21.0067	25.9974
28	1992-06-19	1.67485	19.5804	0.89144	21.3896			9	15.0007	13.9997	10.9967	12.9987	15.0007	17.0027	15.0007	19.0047	23.9954
29	1992-06-20	2.23392	20.2797	1.189	22.5786			10	13.9997	11.9977	10.9967	11.011	12.9987	13.9854	14.014	15.0007	17.0027	21.9934
30	1992-06-21	1.78947	20.979	0.952446	23.531			11	12.9987	10.9967	11.011	7.9937	10.9967	11.9977	13.9997	12.012	15.0007	14.9864	21.0067
31	1992-06-22	1.40819	21.6783	0.749507	24.2805			12	11.9977	9.9957	10.01	7.9937	9.9957	11.011	11.9977	11.9977	10.9967	15.0007	12.9987	19.0047
32	1992-06-23	1.19298	22.3776	0.634964	24.9155			13	10.9967	9.009	9.9957	7.9937	8.008	8.9947	10.9967	12.012	9.9957	10.9967	13.9997	11.9977	18.0037
33	1992-06-24	1.28655	23.0769	0.684765	25.6003			14	10.9967	8.008	8.9947	7.9937	7.007	8.9947	9.009	9.9957	9.9957	11.011	8.9804	13.013	11.9977	17.0027
34	1992-06-25	1.63743	23.7762	0.871519	26.4718			15	8.9947	9.009	7.9937	8.008	5.9917	8.008	7.9937	9.9957	9.009	9.9957	8.9947	10.01	11.9834	11.011	16.0017
35	1992-06-26	1.28655	24.4755	0.684765	27.1565			16	8.9947	8.008	7.9937	7.007	5.9917	7.007	7.9937	8.008	8.9947	7.007	10.9967	7.9937	11.011	9.9957	10.9967	15.0007
36	1992-06-27	2.11813	25.1748	1.12737	28.2839
37	1992-06-28	1.99181	25.8741	1.06014	29.3441			Weights for isotope samples (Table 1); proportion of time in each sample
38	1992-06-29	2.58363	26.5734	1.37513	30.7192			#isotope samples per annual increment	1st	2nd	3rd	4th	5th	6th	7th	8th	9th	10th	11th	12th	13th	14th	15th	16th
39	1992-06-30	1.99181	27.2727	1.06014	31.7793			1	100
40	1992-07-01	2.22573	27.972	1.18464	32.964			2	42.66	57.34
41	1992-07-02	1.75439	28.6713	0.933771	33.8977			3	27.97	31.47	40.56
42	1992-07-03	1.99181	29.3706	1.06014	34.9579			4	22.38	20.28	24.47	32.87
43	1992-07-04	1.64211	30.0699	0.874009	35.8319			5	18.18	15.39	18.88	20.27	27.28
44	1992-07-05	2.10526	30.7692	1.12052	36.9524			6	15.38	12.59	14.69	16.78	18.18	22.38
45	1992-07-06	0.964912	31.4685	0.513574	37.466			7	13.29	11.88	11.19	13.29	13.99	16.08	20.28
46	1992-07-07	1.76959	32.1678	0.941863	38.4079			8	11.59	10.79	9.09	11.19	12.58	11.89	14.69	18.18
47	1992-07-08	1.52047	32.8671	0.809268	39.2171			9	10.49	9.79	7.69	9.09	10.49	11.89	10.49	13.29	16.78
48	1992-07-09	1.9883	33.5664	1.05827	40.2754			10	9.79	8.39	7.69	7.7	9.09	9.78	9.8	10.49	11.89	15.38
49	1992-07-10	0.94269	34.2657	0.501746	40.7771			11	9.09	7.69	7.7	5.59	7.69	8.39	9.79	8.4	10.49	10.48	14.69
50	1992-07-11	1.3076	34.965	0.69597	41.4731			12	8.39	6.99	7	5.59	6.99	7.7	8.39	8.39	7.69	10.49	9.09	13.29
51	1992-07-12	1.63743	35.6643	0.871519	42.3446			13	7.69	6.3	6.99	5.59	5.6	6.29	7.69	8.4	6.99	7.69	9.79	8.39	12.59
52	1992-07-13	1.40351	36.3636	0.747017	43.0917			14	7.69	5.6	6.29	5.59	4.9	6.29	6.3	6.99	6.99	7.7	6.28	9.1	8.39	11.89
53	1992-07-14	1.75439	37.0629	0.933771	44.0254			15	6.29	6.3	5.59	5.6	4.19	5.6	5.59	6.99	6.3	6.99	6.29	7	8.38	7.7	11.19
54	1992-07-15	1.8152	37.7622	0.966141	44.9916			16	6.29	5.6	5.59	4.9	4.19	4.9	5.59	5.6	6.29	4.9	7.69	5.59	7.7	6.99	7.69	10.49
55	1992-07-16	1.40819	38.4615	0.749507	45.7411
56	1992-07-17	1.40351	39.1608	0.747017	46.4881
57	1992-07-18	1.17544	39.8601	0.625626	47.1137
58	1992-07-19	1.19298	40.5594	0.634964	47.7487
59	1992-07-20	1.05263	41.2587	0.560262	48.3089
60	1992-07-21	1.75789	41.958	0.935638	49.2446
61	1992-07-22	0.94269	42.6573	0.501746	49.7463
62	1992-07-23	1.40351	43.3566	0.747017	50.4933
63	1992-07-24	1.40819	44.0559	0.749507	51.2428
64	1992-07-25	1.40819	44.7552	0.749507	51.9924
65	1992-07-26	1.67485	45.4545	0.89144	52.8838
66	1992-07-27	1.52515	46.1538	0.811758	53.6956
67	1992-07-28	1.52047	46.8531	0.809268	54.5048
68	1992-07-29	1.2924	47.5524	0.687878	55.1927
69	1992-07-30	1.33333	48.2517	0.709666	55.9024
70	1992-07-31	0.739181	48.951	0.393429	56.2958
71	1992-08-01	1.2924	49.6503	0.687878	56.9837
72	1992-08-02	1.3076	50.3497	0.69597	57.6796
73	1992-08-03	1.05965	51.049	0.563998	58.2436
74	1992-08-04	1.3076	51.7483	0.69597	58.9396
75	1992-08-05	1.47953	52.4476	0.78748	59.7271
76	1992-08-06	1.52515	53.1469	0.811758	60.5388
77	1992-08-07	1.33333	53.8462	0.709666	61.2485
78	1992-08-08	1.07836	54.5455	0.573958	61.8225
79	1992-08-09	1.36842	55.2448	0.728341	62.5508
80	1992-08-10	1.3076	55.9441	0.69597	63.2468
81	1992-08-11	1.64211	56.6434	0.874009	64.1208
82	1992-08-12	1.40819	57.3427	0.749507	64.8703
83	1992-08-13	0.935673	58.042	0.498011	65.3683
84	1992-08-14	1.07836	58.7413	0.573958	65.9423
85	1992-08-15	1.2924	59.4406	0.687878	66.6301
86	1992-08-16	1.64211	60.1399	0.874009	67.5042
87	1992-08-17	1.40819	60.8392	0.749507	68.2537
88	1992-08-18	1.42339	61.5385	0.757599	69.0113
89	1992-08-19	1.2924	62.2378	0.687878	69.6991
90	1992-08-20	1.52515	62.9371	0.811758	70.5109
91	1992-08-21	1.16959	63.6364	0.622514	71.1334
92	1992-08-22	1.17544	64.3357	0.625626	71.759
93	1992-08-23	1.64211	65.035	0.874009	72.633
94	1992-08-24	1.64211	65.7343	0.874009	73.5071
95	1992-08-25	1.16959	66.4336	0.622514	74.1296
96	1992-08-26	1.2924	67.1329	0.687878	74.8174
97	1992-08-27	1.40819	67.8322	0.749507	75.567
98	1992-08-28	1.05263	68.5315	0.560262	76.1272
99	1992-08-29	1.17544	69.2308	0.625626	76.7528
100	1992-08-30	1.42339	69.9301	0.757599	77.5104
101	1992-08-31	1.33333	70.6294	0.709666	78.2201
102	1992-09-01	1.36842	71.3287	0.728341	78.9484
103	1992-09-02	1.17544	72.028	0.625626	79.5741
104	1992-09-03	1.17544	72.7273	0.625626	80.1997
105	1992-09-04	0.630409	73.4266	0.335535	80.5352
106	1992-09-05	0.739181	74.1259	0.393429	80.9287
107	1992-09-06	0.818713	74.8252	0.43576	81.3644
108	1992-09-07	1.04561	75.5245	0.556527	81.921
109	1992-09-08	0.711111	76.2238	0.378488	82.2994
110	1992-09-09	1.10994	76.9231	0.590766	82.8902
111	1992-09-10	1.19298	77.6224	0.634964	83.5252
112	1992-09-11	1.04561	78.3217	0.556527	84.0817
113	1992-09-12	1.10994	79.021	0.590766	84.6725
114	1992-09-13	1.36374	79.7203	0.725851	85.3983
115	1992-09-14	1.52515	80.4196	0.811758	86.2101
116	1992-09-15	1.25965	81.1189	0.670447	86.8805
117	1992-09-16	1.40819	81.8182	0.749507	87.63
118	1992-09-17	0.851462	82.5175	0.45319	88.0832
119	1992-09-18	1.70292	83.2168	0.90638	88.9896
120	1992-09-19	0.964912	83.9161	0.513574	89.5032
121	1992-09-20	0.818713	84.6154	0.43576	89.9389
122	1992-09-21	1.40351	85.3147	0.747017	90.6859
123	1992-09-22	0.964912	86.014	0.513574	91.1995
124	1992-09-23	0.818713	86.7133	0.43576	91.6353
125	1992-09-24	0.99883	87.4126	0.531627	92.1669
126	1992-09-25	0.964912	88.1119	0.513574	92.6805
127	1992-09-26	0.851462	88.8112	0.45319	93.1337
128	1992-09-27	0.935673	89.5105	0.498011	93.6317
129	1992-09-28	0.964912	90.2098	0.513574	94.1453
130	1992-09-29	0.94269	90.9091	0.501746	94.647
131	1992-09-30	0.851462	91.6084	0.45319	95.1002
132	1992-10-01	0.739181	92.3077	0.393429	95.4936
133	1992-10-02	0.964912	93.007	0.513574	96.0072
134	1992-10-03	0.891228	93.7063	0.474356	96.4816
135	1992-10-04	0.711111	94.4056	0.378488	96.86
136	1992-10-05	0.596491	95.1049	0.317482	97.1775
137	1992-10-06	0.701754	95.8042	0.373508	97.551
138	1992-10-07	0.481871	96.5035	0.256476	97.8075
139	1992-10-08	0.826901	97.2028	0.440117	98.2476
140	1992-10-09	0.701754	97.9021	0.373508	98.6211
141	1992-10-10	0.826901	98.6014	0.440117	99.0612
142	1992-10-11	1.05263	99.3007	0.560262	99.6215
143	1992-10-12	0.711111	100	0.378488	100

## Sheet: Weighted Tw; Tw from Tair
#day	cumul time (%) passed	… at date	daily incr width µm	daily inc (%)	cumul proportion of ann incr (%)			Don't modify any numbers here… weight calculation: %shell per month												Proportion of month in…			sample 1							2							3							4
1	0.699301	1992-05-23	1.40351	0.747017	0.747017				# samples per annual increment (equidistant sampling intervals)												Check		M	J	J	A	S	O		M	J	J	A	S	O		M	J	J	A	S	O		M	J	J	A	S	O
2	1.3986	1992-05-24	1.28655	0.684765	1.43178				1	23May-12Oct										1	100		6.28739	25.4919	24.5165	21.9243	16.8801	4.89981
3	2.0979	1992-05-25	1.40351	0.747017	2.1788				2	23May-22Jul-12Oct										2	100		6.28739	25.4919	17.967							6.54947	21.9243	16.8801	4.89981
4	2.7972	1992-05-26	1.40351	0.747017	2.92582				3	23May-1Jul-15Aug-12Oct										3	100		6.28739	25.4919	1.18464							23.3318	10.3344							11.59	16.8801	4.89981
5	3.4965	1992-05-27	1.40351	0.747017	3.67283				4	23May-23Jun-22Jul-26Aug-12Oct										4	100		6.28739	18.6281							6.86384	17.967							6.54947	18.5217							3.40266	16.8801	4.89981
6	4.1958	1992-05-28	1.40351	0.747017	4.41985				5	23May-17Jun-9Jul-5Aug-3Sep-12Oct										5	100		6.28739	13.5851							11.9068	8.49607							16.0204	3.4313							18.493	1.97959
7	4.8951	1992-05-29	1.05263	0.560262	4.98011				6	23May-13Jun-1Jul-22Jul-15Aug-10Sep-12Oct										6	100		6.28739	10.6879							14.804	1.18464							16.7824							6.54947	10.3344
8	5.59441	1992-05-30	1.28655	0.684765	5.66488				7	23May-10Jun-27Jun-13Jul-1Aug-21Aug-12Sep-12Oct										7	100		6.28739	7.55483							14.4417							3.49542	11.3123							13.2041	0.687878
9	6.29371	1992-05-31	1.16959	0.622514	6.28739				8	23May-8Jun-23Jun-6Jul-22Jul-9Aug-26Aug-16Sep-12Oct										8	100		6.28739	6.28863							12.3395							6.86384	5.68666							12.2803
10	6.99301	1992-06-01	1.16959	0.622514	6.9099				9	23May-6Jun-20Jun-1Jul-14Jul-29Jul-15Aug-30Aug-18Sep-12Oct										9	100		6.28739	4.74729							11.5439							9.20075	1.18464							11.0614
11	7.69231	1992-06-02	1.28655	0.684765	7.59467				10	23May-5Jun-17Jun-28Jun-9Jul-22Jul-5Aug-19Aug-3Sep-20Sep-12Oct										10	100		6.28739	4.11233							9.47279							9.47155							2.43527	8.49607
12	8.39161	1992-06-03	1.40351	0.747017	8.34169				11	23May-4Jun-15Jun-26Jun-4Jul-15Jul-27Jul-10Aug-22Aug-6Sep-21Sep-12Oct										11	100		6.28739	3.11444							8.77745							8.97727							4.62279	4.05257
13	9.09091	1992-06-04	1.99181	1.06014	9.40183				12	23May-3Jun-13Jun-23Jun-1Jul-11Jul-22Jul-3Aug-15Aug-26Aug-10Sep-23Sep-12Oct										12	100		6.28739	2.0543							8.63364							7.94016							6.86384	1.18464
14	9.79021	1992-06-05	1.87485	0.99789	10.3997				13	23May-2Jun-11Jun-21Jun-29Jun-7Jul-16Jul-27Jul-8Aug-18Aug-29Aug-12Sep-24Sep-12Oct										13	100		6.28739	1.30728							7.24544							8.69092							7.18817
15	10.4895	1992-06-06	1.19298	0.634964	11.0347				14	23May-2Jun-10Jun-19Jun-27Jun-4Jul-13Jul-22Jul-1Aug-11Aug-22Aug-31Aug-13Sep-25Sep-12Oct										14	100		6.28739	1.30728							6.24755							7.54736							6.89434
16	11.1888	1992-06-07	1.22105	0.649904	11.6846				15	23May-31May-9Jun-17Jun-25Jun-1Jul-9Jul-17Jul-27Jul-5Aug-15Aug-24Aug-3Sep-15Sep-26Sep-12Oct										15	100		6.28739								6.84516							6.73996							6.59927
17	11.8881	1992-06-08	1.67485	0.89144	12.576				16	23May-31May-8Jun-16Jun-23Jun-29Jun-6Jul-14Jul-22Jul-31Jul-7Aug-18Aug-26Aug-6Sep-16Sep-27Sep-12Oct										16	100		6.28739								6.28863							6.53889							5.80058
18	12.5874	1992-06-09	1.04561	0.556527	13.1326
19	13.2867	1992-06-10	1.33333	0.709666	13.8422
20	13.986	1992-06-11	1.87485	0.99789	14.8401															copied from below… AI137 ff			M	J	J	A	S	O		M	J	J	A	S	O		M	J	J	A	S	O		M	J	J	A	S	O
21	14.6853	1992-06-12	2.22222	1.18278	16.0229																	Tw	4.4458	11.6979	12.7592	10.0175	6.2146	-2.01032		4.4458	11.6979	12.7592	10.0175	6.2146	-2.01032	0	4.4458	11.6979	12.7592	10.0175	6.2146	-2.01032	0	4.4458	11.6979	12.7592	10.0175	6.2146	-2.01032
22	15.3846	1992-06-13	1.78947	0.952446	16.9753
23	16.0839	1992-06-14	0.701754	0.373508	17.3488															calculus…			sample 1							2							3							4
24	16.7832	1992-06-15	1.56023	0.830433	18.1793																		M	J	J	A	S	O		M	J	J	A	S	O		M	J	J	A	S	O		M	J	J	A	S	O
25	17.4825	1992-06-16	1.75789	0.935638	19.1149															1			27.9525	298.202	312.809	219.627	104.903	-9.85018
26	18.1818	1992-06-17	1.42339	0.757599	19.8725															2			27.9525	298.202	229.244							83.5657	219.627	104.903	-9.85018
27	18.8811	1992-06-18	1.17544	0.625626	20.4981															3			27.9525	298.202	15.1151							297.694	103.525							116.103	104.903	-9.85018
28	19.5804	1992-06-19	1.67485	0.89144	21.3896															4			27.9525	217.909							80.2923	229.244							83.5657	185.541							34.0862	104.903	-9.85018
29	20.2797	1992-06-20	2.23392	1.189	22.5786															5			27.9525	158.917							139.285	108.403							204.407	34.3731							185.254	12.3024
30	20.979	1992-06-21	1.78947	0.952446	23.531															6			27.9525	125.026							173.175	15.1151							214.129							83.5657	103.525
31	21.6783	1992-06-22	1.40819	0.749507	24.2805															7			27.9525	88.3755							168.937							40.8889	144.336							168.474	6.89083
32	22.3776	1992-06-23	1.19298	0.634964	24.9155															8			27.9525	73.5637							144.346							80.2923	72.5571							156.687
33	23.0769	1992-06-24	1.28655	0.684765	25.6003															9			27.9525	55.5332							135.039							107.629	15.1151							141.135
34	23.7762	1992-06-25	1.63743	0.871519	26.4718															10			27.9525	48.1055							110.812							110.797							28.4875	108.403
35	24.4755	1992-06-26	1.28655	0.684765	27.1565															11			27.9525	36.4323							102.677							105.015							54.0768	51.7073
36	25.1748	1992-06-27	2.11813	1.12737	28.2839															12			27.9525	24.0309							100.995							92.8831							80.2923	15.1151
37	25.8741	1992-06-28	1.99181	1.06014	29.3441															13			27.9525	15.2924							84.7563							101.665							84.0863
38	26.5734	1992-06-29	2.58363	1.37513	30.7192															14			27.9525	15.2924							73.0831							88.2881							80.6492
39	27.2727	1992-06-30	1.99181	1.06014	31.7793															15			27.9525								80.0739							78.8432							77.1975
40	27.972	1992-07-01	2.22573	1.18464	32.964															16			27.9525								73.5637							76.4911							67.8545
41	28.6713	1992-07-02	1.75439	0.933771	33.8977
42	29.3706	1992-07-03	1.99181	1.06014	34.9579
43	30.0699	1992-07-04	1.64211	0.874009	35.8319
44	30.7692	1992-07-05	2.10526	1.12052	36.9524
45	31.4685	1992-07-06	0.964912	0.513574	37.466																																											River water T estimates from air T
46	32.1678	1992-07-07	1.76959	0.941863	38.4079						airT Stensele
47	32.8671	1992-07-08	1.52047	0.809268	39.2171						YEAR	Jan	Feb	Mar	Apr	May	Jun	Jul	Aug	Sep	Oct	Nov	Dec																									Norrland airT	Ylinen Kihlankijoki
48	33.5664	1992-07-09	1.9883	1.05827	40.2754						1973	-4	-9.4	-1.7	-1.5	5.4	11.9	16.9	10.8	4.2	-1.8	-7.6	-13.5																									-7.7
49	34.2657	1992-07-10	0.94269	0.501746	40.7771						1974	-5.8	-6.2	-5.6	1.8	6.9	12.6	12.7	11.7	8.9	0.4	-6.3	-9.2																									-14.4
50	34.965	1992-07-11	1.3076	0.69597	41.4731						1975	-8.9	-4.4	-3	-1.2	6.1	9.3	12.9	11.6	7.9	2.2	-2.1	-7																									-4.7
51	35.6643	1992-07-12	1.63743	0.871519	42.3446						1976	-16.9	-7.6	-8	-0.8	8.2	10.8	13	12.6	3.8	-0.3	-4.5	-11.4																									1
52	36.3636	1992-07-13	1.40351	0.747017	43.0917						1977	-12.6	-15.6	-3.4	-2.7	4.1	9.9	12.6	11.5	6.2	1.9	-4.9	-6.4																									4.6	4
53	37.0629	1992-07-14	1.75439	0.933771	44.0254						1978	-11.6	-16.5	-7	-2.1	5.3	11.7	13.5	10.9	5.7	1	-5.6	-19																									9.9	8
54	37.7622	1992-07-15	1.8152	0.966141	44.9916						1979	-18	-13	-4.6	-1	5.7	12.7	13.5	11.8	6	-0.8	-4.9	-10.7																									14.7	9.66667
55	38.4615	1992-07-16	1.40819	0.749507	45.7411						1980	-15.6	-15.4	-8.7	1.6	6	14.2	15.4	12.3	8	-1.3	-11.3	-12.9																									13.8
56	39.1608	1992-07-17	1.40351	0.747017	46.4881																																											5.6
57	39.8601	1992-07-18	1.17544	0.625626	47.1137						Tw (reco river water T)																																					1.5
58	40.5594	1992-07-19	1.19298	0.634964	47.7487						YEAR	Jan	Feb	Mar	Apr	May	Jun	Jul	Aug	Sep	Oct	Nov	Dec																									-2.9
59	41.2587	1992-07-20	1.05263	0.560262	48.3089						1973					3.91516	9.66376	14.0858	8.69092	2.85388	-2.45252																											-4.3
60	41.958	1992-07-21	1.75789	0.935638	49.2446						1974					5.24176	10.2828	10.3713	9.48688	7.01056	-0.50684																											-6.3
61	42.6573	1992-07-22	0.94269	0.501746	49.7463						1975					4.53424	7.36432	10.5482	9.39844	6.12616	1.08508																											-4.3
62	43.3566	1992-07-23	1.40351	0.747017	50.4933						1976					6.39148	8.69092	10.6366	10.2828	2.50012	-1.12592																											-1.6
63	44.0559	1992-07-24	1.40819	0.749507	51.2428						1977					2.76544	7.89496	10.2828	9.31	4.62268	0.81976																											-2.8
64	44.7552	1992-07-25	1.40819	0.749507	51.9924						1978					3.82672	9.48688	11.0788	8.77936	4.18048	0.0238																											8.3
65	45.4545	1992-07-26	1.67485	0.89144	52.8838						1979					4.18048	10.3713	11.0788	9.57532	4.4458	-1.56812																											13.3
66	46.1538	1992-07-27	1.52515	0.811758	53.6956						1980					4.4458	11.6979	12.7592	10.0175	6.2146	-2.01032																											11.7
67	46.8531	1992-07-28	1.52047	0.809268	54.5048																																											10.2
68	47.5524	1992-07-29	1.2924	0.687878	55.1927																																											7.3
69	48.2517	1992-07-30	1.33333	0.709666	55.9024								first		copy Tw data from desired year																																	-4.7
70	48.951	1992-07-31	0.739181	0.393429	56.2958																																											-6.7
71	49.6503	1992-08-01	1.2924	0.687878	56.9837										paste as…	4.4458	11.6979	12.7592	10.0175	6.2146	-2.01032																											-4.6
72	50.3497	1992-08-02	1.3076	0.69597	57.6796										and copy again																																	-8.8
73	51.049	1992-08-03	1.05965	0.563998	58.2436																																											-7.4
74	51.7483	1992-08-04	1.3076	0.69597	58.9396																																											-3.5
75	52.4476	1992-08-05	1.47953	0.78748	59.7271								second		… then past transposed data here																																	0.5
76	53.1469	1992-08-06	1.52515	0.811758	60.5388												May	9	4.4458																													8.2	3.83333
77	53.8462	1992-08-07	1.33333	0.709666	61.2485												Jun	30	11.6979																													8.4	6.1
78	54.5455	1992-08-08	1.07836	0.573958	61.8225												Jul	31	12.7592																													13.6	8.75
79	55.2448	1992-08-09	1.36842	0.728341	62.5508												Aug	31	10.0175																													10.8
80	55.9441	1992-08-10	1.3076	0.69597	63.2468												Sep	30	6.2146																													5
81	56.6434	1992-08-11	1.64211	0.874009	64.1208												Oct	12	-2.01032																													-0.5
82	57.3427	1992-08-12	1.40819	0.749507	64.8703													143				proportionate arithmetic Tw means																										-5.2
83	58.042	1992-08-13	0.935673	0.498011	65.3683						temporal range of samples											1	2	3	4	5	6	7	8	9	10	11	12	13	14	15	16											-10.4
84	58.7413	1992-08-14	1.07836	0.573958	65.9423					1	23May-12Oct											8.80657																										-14.6
85	59.4406	1992-08-15	1.2924	0.687878	66.6301					2	23May-22Jul-12Oct											11.0107	7.16695																									-17.3
86	60.1399	1992-08-16	1.64211	0.874009	67.5042					3	23May-1Jul-15Aug-12Oct											9.84653	11.8453	5.56197																								-6.5
87	60.8392	1992-08-17	1.40819	0.749507	68.2537					4	23May-23Jun-22Jul-26Aug-12Oct											9.65823	12.503	10.6626	4.51919																							2
88	61.5385	1992-08-18	1.42339	0.757599	69.0113					5	23May-17Jun-9Jul-5Aug-3Sep-12Oct											9.18754	12.132	12.2514	8.96115	3.13026																						5	2.64286
89	62.2378	1992-08-19	1.2924	0.687878	69.6991					6	23May-13Jun-1Jul-22Jul-15Aug-10Sep-12Oct											8.73112	11.7568	12.7592	10.9711	8.55486	2.92463																					9.2	6.66667
90	62.9371	1992-08-20	1.52515	0.811758	70.5109					7	23May-10Jun-27Jun-13Jul-1Aug-21Aug-12Sep-12Oct											8.26268	11.6979	12.5602	12.6149	10.0175	7.67726	2.41848																				15.9	9.16667
91	63.6364	1992-08-21	1.16959	0.622514	71.1334					8	23May-8Jun-23Jun-6Jul-22Jul-9Aug-26Aug-16Sep-12Oct											7.85854	11.6979	12.3877	12.7592	12.5979	10.0175	7.12006	2.41848																			12.5	8.125
92	64.3357	1992-08-22	1.17544	0.625626	71.759					9	23May-6Jun-20Jun-1Jul-14Jul-29Jul-15Aug-30Aug-18Sep-12Oct											7.34663	11.6979	12.1877	12.7592	12.7592	10.3401	10.0175	6.41475	2.10214																		6.2	7
93	65.035	1992-08-23	1.64211	0.874009	72.633					10	23May-5Jun-17Jun-28Jun-9Jul-22Jul-5Aug-19Aug-3Sep-20Sep-12Oct											7.03583	11.6979	11.6979	12.5662	12.7592	11.7047	10.0175	9.25694	6.2146	1.72828																	0.5
94	65.7343	1992-08-24	1.64211	0.874009	73.5071					11	23May-4Jun-15Jun-26Jun-4Jul-15Jul-27Jul-10Aug-22Aug-6Sep-21Sep-12Oct											6.67721	11.6979	11.6979	11.6979	12.7592	12.7592	10.8008	10.0175	8.49635	6.2146	1.51465																-5.3
95	66.4336	1992-08-25	1.16959	0.622514	74.1296					12	23May-3Jun-13Jun-23Jun-1Jul-11Jul-22Jul-3Aug-15Aug-26Aug-10Sep-23Sep-12Oct											6.25882	11.6979	11.6979	11.8305	12.7592	12.7592	12.0737	10.0175	10.0175	7.48224	6.2146	1.01991															-4.9
96	67.1329	1992-08-26	1.2924	0.687878	74.8174					13	23May-2Jun-11Jun-21Jun-29Jun-7Jul-16Jul-27Jul-8Aug-18Aug-29Aug-12Sep-24Sep-12Oct											5.76436	11.6979	11.6979	11.6979	12.6265	12.7592	12.7592	11.469	10.0175	10.0175	6.75787	6.2146	0.73132														-9.1
97	67.8322	1992-08-27	1.40819	0.749507	75.567					14	23May-2Jun-10Jun-19Jun-27Jun-4Jul-13Jul-22Jul-1Aug-11Aug-22Aug-31Aug-13Sep-25Sep-12Oct											5.76436	11.6979	11.6979	11.6979	12.3043	12.7592	12.7592	12.485	10.0175	10.0175	10.0175	6.2146	6.2146	0.408774													-6.4
98	68.5315	1992-08-28	1.05263	0.560262	76.1272					15	23May-31May-9Jun-17Jun-25Jun-1Jul-9Jul-17Jul-27Jul-5Aug-15Aug-24Aug-3Sep-15Sep-26Sep-12Oct											4.4458	11.6979	11.6979	11.6979	11.8748	12.7592	12.7592	12.7592	11.236	10.0175	10.0175	8.87664	6.2146	6.2146	0.04591												-2.7
99	69.2308	1992-08-29	1.17544	0.625626	76.7528					16	23May-31May-8Jun-16Jun-23Jun-29Jun-6Jul-14Jul-22Jul-31Jul-7Aug-18Aug-26Aug-6Sep-16Sep-27Sep-12Oct											4.4458	11.6979	11.6979	11.6979	11.6979	12.6075	12.7592	12.7592	12.7592	10.0175	10.0175	10.0175	7.9432	6.2146	6.2146	-0.365336											-1.1
100	69.9301	1992-08-30	1.42339	0.757599	77.5104																																											5.1	0.95
101	70.6294	1992-08-31	1.33333	0.709666	78.2201																																											12.1	7.25714
102	71.3287	1992-09-01	1.36842	0.728341	78.9484																																											12	9.64
103	72.028	1992-09-02	1.17544	0.625626	79.5741																																											11.8	8.05
104	72.7273	1992-09-03	1.17544	0.625626	80.1997																																											6.6	4.9
105	73.4266	1992-09-04	0.630409	0.335535	80.5352																																											2.8
106	74.1259	1992-09-05	0.739181	0.393429	80.9287								third		… copy desired line (= sampes per yr?) of Tw* (weighted Tw means below), past as … somwhere, copy again and paste transposed data in columns C, E, P, Q of folder "Intra-annual d18Owr")																																	-6
107	74.8252	1992-09-06	0.818713	0.43576	81.3644																																											-11.5
108	75.5245	1992-09-07	1.04561	0.556527	81.921																																											-8
109	76.2238	1992-09-08	0.711111	0.378488	82.2994																																											-12.8
110	76.9231	1992-09-09	1.10994	0.590766	82.8902																																											-4.9
111	77.6224	1992-09-10	1.19298	0.634964	83.5252																	weighted Tw means, Tw*																										0.9
112	78.3217	1992-09-11	1.04561	0.556527	84.0817				arithmetic mean		temporal range of samples											1	2	3	4	5	6	7	8	9	10	11	12	13	14	15	16											5.6	1.3
113	79.021	1992-09-12	1.10994	0.590766	84.6725				9.53644	1	23May-12Oct											9.53644																										10.9	6.4
114	79.7203	1992-09-13	1.36374	0.725851	85.3983				9.54466	2	23May-22Jul-12Oct											11.1646	7.92471																									12.9	8.44
115	80.4196	1992-09-14	1.52515	0.811758	86.2101				9.5327	3	23May-1Jul-15Aug-12Oct											10.3528	11.9176	6.32773																								14.7	9.45
116	81.1189	1992-09-15	1.25965	0.670447	86.8805				9.54887	4	23May-23Jun-22Jul-26Aug-12Oct											9.86783	12.4658	10.7337	5.12811																							7.1	4.48
117	81.8182	1992-09-16	1.40819	0.749507	87.63				9.52956	5	23May-17Jun-9Jul-5Aug-3Sep-12Oct											9.40342	12.1398	12.2755	9.6498	4.17925																						2.9
118	82.5175	1992-09-17	0.851462	0.45319	88.0832				9.53672	6	23May-13Jun-1Jul-22Jul-15Aug-10Sep-12Oct											9.01183	11.7765	12.7592	11.081	8.8234	3.76841																					-8.5
119	83.2168	1992-09-18	1.70292	0.90638	88.9896				9.57739	7	23May-10Jun-27Jun-13Jul-1Aug-21Aug-12Sep-12Oct											8.40385	11.6979	12.5086	12.6234	10.0175	8.20515	3.58531																				-12.2
120	83.9161	1992-09-19	0.964912	0.513574	89.5032				9.54082	8	23May-8Jun-23Jun-6Jul-22Jul-9Aug-26Aug-16Sep-12Oct											8.0722	11.6979	12.1787	12.7592	11.4199	10.0175	7.22455	2.95667
121	84.6154	1992-09-20	0.818713	0.43576	89.9389				9.54494	9	23May-6Jun-20Jun-1Jul-14Jul-29Jul-15Aug-30Aug-18Sep-12Oct											7.56576	11.6979	11.8189	12.7592	12.7592	10.2819	10.0175	6.4497	2.55438
122	85.3147	1992-09-21	1.40351	0.747017	90.6859				9.55494	10	23May-5Jun-17Jun-28Jun-9Jul-22Jul-5Aug-19Aug-3Sep-20Sep-12Oct											7.31347	11.6979	11.6979	12.5227	12.7592	11.8166	10.0175	9.30058	6.2146	2.20901
123	86.014	1992-09-22	0.964912	0.513574	91.1995				9.60111	11	23May-4Jun-15Jun-26Jun-4Jul-15Jul-27Jul-10Aug-22Aug-6Sep-21Sep-12Oct											6.84811	11.6979	11.6979	12.1936	12.7592	12.7592	10.7639	10.0175	8.77264	6.2146	1.88775
124	86.7133	1992-09-23	0.818713	0.43576	91.6353				9.5398	12	23May-3Jun-13Jun-23Jun-1Jul-11Jul-22Jul-3Aug-15Aug-26Aug-10Sep-23Sep-12Oct											6.23176	11.6979	11.6979	11.8541	12.7592	12.7592	12.1307	10.0175	10.0175	7.70064	6.2146	1.39668
125	87.4126	1992-09-24	0.99883	0.531627	92.1669				9.54247	13	23May-2Jun-11Jun-21Jun-29Jun-7Jul-16Jul-27Jul-8Aug-18Aug-29Aug-12Sep-24Sep-12Oct											5.69411	11.6979	11.6979	11.6979	12.6128	12.7592	12.7592	10.8947	10.0175	10.0175	6.91917	6.2146	1.06969
126	88.1119	1992-09-25	0.964912	0.513574	92.6805				9.5902	14	23May-2Jun-10Jun-19Jun-27Jun-4Jul-13Jul-22Jul-1Aug-11Aug-22Aug-31Aug-13Sep-25Sep-12Oct											5.69411	11.6979	11.6979	11.6979	12.2677	12.7592	12.7592	12.4986	10.0175	10.0175	10.0175	6.2146	6.2146	0.708702													T(air, Arvidsjaur)	T(water, Skellefteälven)
127	88.8112	1992-09-26	0.851462	0.45319	93.1337				9.50734	15	23May-31May-9Jun-17Jun-25Jun-1Jul-9Jul-17Jul-27Jul-5Aug-15Aug-24Aug-3Sep-15Sep-26Sep-12Oct											4.4458	11.6979	11.6979	11.6979	11.8915	12.7592	12.7592	12.7592	11.1995	10.0175	10.0175	8.89267	6.2146	6.2146	0.345303												8.2	6.8
128	89.5105	1992-09-27	0.935673	0.498011	93.6317				9.54165	16	23May-31May-8Jun-16Jun-23Jun-29Jun-6Jul-14Jul-22Jul-31Jul-7Aug-18Aug-26Aug-6Sep-16Sep-27Sep-12Oct											4.4458	11.6979	11.6979	11.6979	11.6979	12.5924	12.7592	12.7592	12.7592	10.0175	10.0175	10.0175	8.19109	6.2146	6.2146	-0.113684											11.9	10.7
129	90.2098	1992-09-28	0.964912	0.513574	94.1453																																											15.4	17.2
130	90.9091	1992-09-29	0.94269	0.501746	94.647							Due to seasonal variations of growth rate, weighted averages of T are required. For each sample a weighted T average must be computed that considers variations in growth rate during time of formation of the respective shell portion.																																				11.3	12.7
131	91.6084	1992-09-30	0.851462	0.45319	95.1002							T averages of each sample of one year can be arithmetically averaged to obtain the average temperature during the growing season (Example in AB179 ff.)																																				9	10.6
132	92.3077	1992-10-01	0.739181	0.393429	95.4936																																											4.3	3.9
133	93.007	1992-10-02	0.964912	0.513574	96.0072							To compute d18O(water) from d18O(shell) and Tw, the weighted d18O(shell) is multiplied with the weighted Tw.																																				11.5	13.6
134	93.7063	1992-10-03	0.891228	0.474356	96.4816																																											13.3	13.5
135	94.4056	1992-10-04	0.711111	0.378488	96.86																																											11.3	14
136	95.1049	1992-10-05	0.596491	0.317482	97.1775																																											7.4	9.8
137	95.8042	1992-10-06	0.701754	0.373508	97.551																																											10.4	9.2
138	96.5035	1992-10-07	0.481871	0.256476	97.8075																																											10.6	12.8
139	97.2028	1992-10-08	0.826901	0.440117	98.2476																																											18.7	19.3
140	97.9021	1992-10-09	0.701754	0.373508	98.6211																																											12.8	13.8
141	98.6014	1992-10-10	0.826901	0.440117	99.0612																																											8	9.1
142	99.3007	1992-10-11	1.05263	0.560262	99.6215
143	100	1992-10-12	0.711111	0.378488	100
			187.882	100
										Relative proportion of time of the growing season contained in each sample of the annual increment
										# Samples/yr	weights = %days growing season
											1st	2nd	3rd	4th	5	6	7	8	9	10	11	12	13	14	15	16
									100	1	100
									100	2	42.66	57.34
									100	3	27.97	31.47	40.56
									100	4	22.38	20.28	24.47	32.87
									100	5	18.18	15.39	18.88	20.27	27.28
									100	6	15.38	12.59	14.69	16.78	18.18	22.38
									100	7	13.29	11.88	11.19	13.29	13.99	16.08	20.28
									100	8	11.59	10.79	9.09	11.19	12.58	11.89	14.69	18.18
				equidistant samples	corresp to percent time passed				100	9	10.49	9.79	7.69	9.09	10.49	11.89	10.49	13.29	16.78
				6.25	6.29371	1992-05-31			100	10	9.79	8.39	7.69	7.7	9.09	9.78	9.8	10.49	11.89	15.38
				12.5	11.8881	1992-06-08			100	11	9.09	7.69	7.7	5.59	7.69	8.39	9.79	8.4	10.49	10.48	14.69
				18.75	17.4825	1992-06-16			100	12	8.39	6.99	7	5.59	6.99	7.7	8.39	8.39	7.69	10.49	9.09	13.29
				25	22.3776	1992-06-23			100	13	7.69	6.3	6.99	5.59	5.6	6.29	7.69	8.4	6.99	7.69	9.79	8.39	12.59
				31.25	26.5734	1992-06-29			100	14	7.69	5.6	6.29	5.59	4.9	6.29	6.3	6.99	6.99	7.7	6.28	9.1	8.39	11.89
				37.5	31.4685	1992-07-06			100	15	6.29	6.3	5.59	5.6	4.19	5.6	5.59	6.99	6.3	6.99	6.29	7	8.38	7.7	11.19
				43.75	37.0629	1992-07-14			100	16	6.29	5.6	5.59	4.9	4.19	4.9	5.59	5.6	6.29	4.9	7.69	5.59	7.7	6.99	7.69	10.49
				50	42.6573	1992-07-22
				56.25	48.951	1992-07-31
				62.5	53.8462	1992-08-07
				68.75	61.5385	1992-08-18
				75	67.1329	1992-08-26
				81.25	74.8252	1992-09-06				(1) compute proportion of sample (%) in annual increment; example 16 samples: 1/16 per milling step = 6.25%
				87.5	81.8182	1992-09-16				(2) compute cumulative sample step curve (%); example 1st sample = 6.25%, 2nd sample = 12.5% etc. of annual increment
				93.75	89.5105	1992-09-27				(3) use curve of 2 to check how much time is contained in each sample: nearest value in column F, get data from column B and date from column C
				100						(4) compute "weights" = determine how much relative time is represented by each milling step of a given year
											fast growing shell portions get lower weight than slow growing portions, i.e., sample in fast growing shell portions contains less time
					Growth of annual incr during month in %					(5) note dates at which each sample ends (temporal ranges)
					May	6.28739	6.28739			(6) switch to shell data, determine # of samples per annual increment to determine which temporal range scheme will be used in 7 to 9
					June	25.4926	31.7793				weights can be used to compute weighted annual means of whatever is measured in shell
					July	24.5165	56.2958
					August	21.9243	78.2201
					September	16.8801	95.1002
					October	4.89981	100
[truncated: 84 more columns]

## Sheet: Intra-annual d18Owr
ED-NJB-A6R														ED-NJB-A4R
							for plotting data…													for plotting data…
d18Os	yr	reco Tw*	d18Owr*	reco Tw*	d18Owr*		t (midpoint of temporal coverage)	d18Owr*		yr	d18Owr*		d18Os	yr	reco Tw*	d18Owr*	reco Tw*	d18Owr*		t (midpoint of temporal coverage)	d18Owr*		yr	d18Owr*
-9.49314	1973	6.78974	-12.4052				1973-05-31	-12.4052		1973	-12.358		-9.78131	1973	7.53457	-12.5218				1973-06-03	-12.5218		1973	-12.3477			airT Stensele, Ta
-9.79757		9.66376	-12.0474				1973-06-15	-12.0474		1974	-12.6335		-9.99384		9.9914	-12.1682				1973-06-22	-12.1682		1974	-12.3227			YEAR	Jan	Feb	Mar	Apr	May	Jun	Jul	Aug	Sep	Oct	Nov	Dec
-9.84517		11.6674	-11.6334				1973-06-29	-11.6334		1975	-12.2891		-9.71713		14.0858	-10.9481				1973-07-11	-10.9481		1975	-12.1788			1973	-4	-9.4	-1.7	-1.5	5.4	11.9	16.9	10.8	4.2	-1.8	-7.6	-13.5
-9.92691		14.0858	-11.1579				1973-07-14	-11.1579		1976	-12.2937		-9.81613		10.7837	-11.808				1973-08-03	-11.808		1976	-11.9424			1974	-5.8	-6.2	-5.6	1.8	6.9	12.6	12.7	11.7	8.9	0.4	-6.3	-9.2
-10.3605		11.4504	-12.1987				1973-07-31	-12.1987		1977	-12.7047		-9.93051		6.85808	-12.8269				1973-08-27	-12.8269		1977	-12.5114			1975	-8.9	-4.4	-3	-1.2	6.1	9.3	12.9	11.6	7.9	2.2	-2.1	-7
-9.85094		8.69092	-12.325				1973-08-17	-12.325		1978	-12.8036		-9.63055	1974	1.27569	-13.8132	8.4157	-12.168		1973-09-25	-13.8132		1978	-12.8348			1976	-16.9	-7.6	-8	-0.8	8.2	10.8	13	12.6	3.8	-0.3	-4.5	-11.4
-9.64248		4.40403	-13.1043				1973-09-05	-13.1043		1979	-12.8757		-10.202				10.2894	-12.3077		1974-06-03	-12.168		1979	-12.8922			1977	-12.6	-15.6	-3.4	-2.7	4.1	9.9	12.6	11.5	6.2	1.9	-4.9	-6.4
-9.68909	1974	0.751989	-13.9924	7.41051	-12.4581		1973-09-29	-13.9924		1980	-12.1235		-10.0315				10.3713	-12.1183		1974-06-22	-12.3077		1980	-12.4371			1978	-11.6	-16.5	-7	-2.1	5.3	11.7	13.5	10.9	5.7	1	-5.6	-19
-10.9101				10.2828	-13.0174		1974-05-31	-12.4581					-9.72185				9.82995	-11.9334		1974-07-11	-12.1183						1979	-18	-13	-4.6	-1	5.7	12.7	13.5	11.8	6	-0.8	-4.9	-10.7
-10.6412				10.2929	-12.7461		1974-06-14	-13.0174					-9.84453				8.70931	-12.3143		1974-08-03	-11.9334						1980	-15.6	-15.4	-8.7	1.6	6	14.2	15.4	12.3	8	-1.3	-11.3	-12.9
-10.1089				10.3713	-12.1957		1974-06-25	-12.7461					-9.71829	1975	6.46892	-12.7043	4.7748	-13.0947		1974-08-27	-12.3143
-10.2858				10.3713	-12.3726		1974-07-07	-12.1957					-10.0148		8.69012	-12.489				1974-09-25	-13.0947						Tw (reconstructed river water T)
-10.0385				9.57218	-12.3095		1974-07-21	-12.3726					-9.48828		10.3453	-11.5811				1975-06-05	-12.7043						YEAR	Jan	Feb	Mar	Apr	May	Jun	Jul	Aug	Sep	Oct	Nov	Dec
-10.1808				9.48688	-12.4714		1974-08-07	-12.3095					-9.29042		9.08203	-11.6743				1975-06-28	-12.489						1973					3.91516	9.66376	14.0858	8.69092	2.85388	-2.45252
-9.71738				7.16365	-12.5433		1974-08-22	-12.4714					-9.09256	1976	4.87869	-12.445	7.96341	-11.7342		1975-07-22	-11.5811						1974					5.24176	10.2828	10.3713	9.48688	7.01056	-0.50684
-9.9557	1975	5.2312	-13.2269	3.6652	-13.5877		1974-09-09	-12.5433					-9.3134				9.50113	-11.6007		1975-08-20	-11.6743						1975					4.53424	7.36432	10.5482	9.39844	6.12616	1.08508
-10.1276		7.36432	-12.9073				1974-10-01	-13.5877					-9.45446				10.5742	-11.4946		1975-09-29	-12.445						1976					6.39148	8.69092	10.6366	10.2828	2.50012	-1.12592
-10.0261		7.36432	-12.8058				1975-05-29	-13.2269					-9.37187				9.53029	-11.6525		1976-06-05	-11.7342						1977					2.76544	7.89496	10.2828	9.31	4.62268	0.81976
-9.74528		7.83294	-12.417				1975-06-08	-12.9073					-9.12298	1977	4.97224	-12.4538	1.60282	-13.2302		1976-06-28	-11.6007						1978					3.82672	9.48688	11.0788	8.77936	4.18048	0.0238
-9.34781		10.5482	-11.3939				1975-06-18	-12.8058					-9.66129		7.89496	-12.3187				1976-07-22	-11.4946						1979					4.18048	10.3713	11.0788	9.57532	4.4458	-1.56812
-9.30052		10.5482	-11.3466				1975-06-27	-12.417					-9.95448		8.16734	-12.5491				1976-08-20	-11.6525						1980					4.4458	11.6979	12.7592	10.0175	6.2146	-2.01032
-9.46895		10.2846	-11.5758				1975-07-05	-11.3939					-9.96187		10.2828	-12.0691				1976-09-29	-13.2302
-9.61301		9.39844	-11.924				1975-07-16	-11.3466					-9.88051		10.2828	-11.9877				1977-05-31	-12.4538						Reconstructed monthly Tw data serve as the basis to compute Tw* during time when intra-annual shell portions formed that were sampled for isotopes (Tw* for individual isotope samples)
-9.6324		9.39844	-11.9434				1975-07-28	-11.5758					-10.0234		9.40383	-12.3331				1977-06-14	-12.3187
-9.63561		7.40485	-12.406				1975-08-10	-11.924					-9.84781		9.31	-12.1792				1977-06-25	-12.5491
-9.55001		6.12616	-12.615				1975-08-21	-11.9434					-9.9017		4.91246	-13.2463				1977-07-07	-12.0691
-9.16204	1976	3.17324	-12.9074	7.38073	-11.938		1975-09-02	-12.406					-9.6642	1978	2.93032	-13.4656	6.65708	-12.6069		1977-07-21	-11.9877
-9.46861				8.69092	-11.9426		1975-09-16	-12.615					-10.0764				9.48688	-12.3671		1977-08-07	-12.3331
-9.32772				8.91286	-11.7506		1975-10-01	-12.9074					-10.3401				10.2082	-12.4646		1977-08-22	-12.1792
-9.3124				10.6366	-11.3381		1976-05-31	-11.938					-10.6184				11.0788	-12.5422		1977-09-09	-13.2463
-9.6975				10.6366	-11.7232		1976-06-14	-11.9426					-10.4793				9.95552	-12.6619		1977-10-01	-13.4656
-9.85077				10.317	-11.9501		1976-06-25	-11.7506					-10.3997				8.77936	-12.8533		1978-05-30	-12.6069
-10.1853				10.2828	-12.2925		1976-07-07	-11.3381					-10.04				5.40181	-13.2718		1978-06-16	-12.3671
-10.0406				2.98126	-13.8302		1976-07-21	-11.7232					-10.0176	1979	8.4126	-12.5558	2.534	-13.9103		1978-06-30	-12.4646
-9.60541	1977	4.79379	-12.9774	0.886474	-13.8777		1976-08-07	-11.9501					-10.3764		10.6659	-12.3953				1978-07-14	-12.5422
-9.72433		7.89496	-12.3818				1976-08-22	-12.2925					-10.4296		10.8136	-12.4145				1978-07-31	-12.6619
-9.4557		7.89496	-12.1131				1976-09-09	-13.8302					-10.5752		9.07932	-12.9598				1978-08-18	-12.8533
-10.0121		9.75087	-12.2419				1976-10-01	-13.8777					-10.3407	1980	2.95759	-14.1358	7.56576	-13.074		1978-09-06	-13.2718
-10.1688		10.2828	-12.276				1977-05-29	-12.9774					-10.4166				11.6979	-12.1978		1978-09-29	-13.9103
-10.2961		9.94839	-12.4804				1977-06-12	-12.3818					-10.4546				11.8189	-12.2079		1979-06-05	-12.5558
-10.1671		9.31	-12.4985				1977-06-23	-12.1131					-10.3934				12.7592	-11.93		1979-06-28	-12.3953
-10.2428		8.42633	-12.7778				1977-07-03	-12.2419					-10.3789				12.7592	-11.9156		1979-07-22	-12.4145
-10.1754		4.62268	-13.5868				1977-07-15	-12.276					-10.2995				10.2819	-12.4069		1979-08-20	-12.9598
-9.87558	1978	2.77063	-13.7137	5.22064	-13.1492		1977-07-29	-12.4804					-9.95641				10.0175	-12.1248		1979-09-29	-14.1358
-10.0207				9.48688	-12.3113		1977-08-11	-12.4985					-9.71819				6.4497	-12.7086		1980-05-31	-13.074
-10.2791				9.48688	-12.5697		1977-08-26	-12.7778					-9.47996				2.55438	-13.3679		1980-06-14	-12.1978
-10.5375				9.72119	-12.7741		1977-09-09	-13.5868												1980-06-25	-12.2079
-10.4284				11.0788	-12.3522		1977-09-30	-13.7137												1980-07-07	-11.93
-10.2724				11.0788	-12.1962		1978-05-29	-13.1492												1980-07-21	-11.9156
-10.5171				10.5517	-12.5624		1978-06-08	-12.3113												1980-08-07	-12.4069
-10.4977				8.77936	-12.9513		1978-06-18	-12.5697												1980-08-22	-12.1248
-10.3295				8.77936	-12.7831		1978-06-17	-12.7741												1980-09-09	-12.7086
-10.0113				5.97755	-13.1105		1978-07-05	-12.3522												1980-10-01	-13.3679
-9.98526				4.18048	-13.4986		1978-07-16	-12.1962
-9.31065	1979	5.24611	-12.5784	1.74562	-13.385		1978-07-28	-12.5624
-9.64998		10.3713	-11.7368				1978-08-10	-12.9513
-10.1983		10.3713	-12.2851				1978-08-21	-12.7831
-10.7274		10.3713	-12.8143				1978-09-02	-13.1105
-10.6041		10.9812	-12.5504				1978-09-16	-13.4986
-10.3499		11.0788	-12.2737				1978-10-01	-13.385
-10.7432		11.0788	-12.667				1979-05-27	-12.5784
-10.665		10.0564	-12.8244				1979-06-06	-11.7368
-10.6931		9.57532	-12.9633				1979-06-16	-12.2851
-10.7274		9.57532	-12.9977				1979-06-25	-12.8143
-10.5829		5.39614	-13.8161				1979-07-03	-12.5504
-10.5398		4.4458	-13.992				1979-07-11	-12.2737
-9.56563	1980	0.683934	-13.8846	4.4458	-13.0178		1979-07-21	-12.667
-9.82018				11.6979	-11.6014		1979-08-02	-12.8244
-9.70796				11.6979	-11.4891		1979-08-13	-12.9633
-10.0304				11.6979	-11.8116		1979-08-23	-12.9977
-10.0239				11.6979	-11.8051		1979-09-04	-13.8161
-10.5092				12.5924	-12.0842		1979-09-18	-13.992
-10.0626				12.7592	-11.5992		1979-10-02	-13.8846
-9.19595				12.7592	-10.7326		1980-05-26	-13.0178
-9.67332				12.7592	-11.21		1980-06-04	-11.6014
-9.66397				10.0175	-11.8323		1980-06-12	-11.4891
-9.83752				10.0175	-12.0059		1980-06-20	-11.8116
-9.9811				10.0175	-12.1495		1980-06-26	-11.8051
-10.1247				8.19109	-12.7139		1980-07-03	-12.0842
-9.94131				6.2146	-12.9859		1980-07-10	-11.5992
-9.72339				6.2146	-12.768		1980-07-18	-10.7326
-9.6672				-0.113684	-14.1699		1980-07-26	-11.21
							1980-08-04	-11.8323
							1980-08-12	-12.0059
							1980-08-22	-12.1495
							1980-09-01	-12.7139
							1980-09-11	-12.9859
							1980-09-21	-12.768
							1980-10-04	-14.1699

## Sheet: GNIP, GNIR data, d18Owr(NJB)
																									Calculation Table 3
																	gaps filled (linear interpolation)									GNIP	GNIR				GNIR
		GNIR				GNIP				GNIP						GNIR	GNIP	GNIP								Racksund	Slagnas	ED-NJB-A6R	ED-NJB-A4R		Slagnas	ED-NJB-A6R	ED-NJB-A4R				GNIP	GNIR				GNIR
		Slagnas	gaps filled			Racksund	gaps filled			Arjeplog	average precipitation amount					Slagnas	Racksund	Racksund			ED-NJB-A6R	ED-NJB-A4R				d18O	d18Ow	d18Owr*	d18Owr*		d18Ow	d18Owr*	d18Owr*				Racksund	Slagnas	ED-NJB-A6R	ED-NJB-A4R		Slagnas	ED-NJB-A6R	ED-NJB-A4R
	Date	d18Ow	d18Ow		Date	d18Op	d18Op		Date	Prec mm	Month	Prec mm	%		yr	d18Ow	d18O	d18O			d18Owr*	d18Owr*	av			+ snow											d18O	d18Ow	d18Owr*	d18Owr*		d18Ow	d18Owr*	d18Owr*
	1973-01-15	-11.8	-11.8		1975-01-15	-14.6	-14.6	-60	1961-01-15	25	Jan	18.8571	4.10959	4.10959	Summer average (JJAS)			AMJJ			JJAS		-60			Dec-Sep	May-Oct	entire yr (May-Oct)			May-Oct	entire yr (May-Oct)					R	0.998942	0.977706	0.994203			0.985661	0.992403
	1973-02-15	-12.5	-12.5		1975-02-15		-14	-57.5342	1961-02-15	37	Feb	18.8571	4.10959	4.10959	1975	-12.35	-9.40131	-8.94882		1975	-12.1335	-12.1788	-57.5342		1975	-10.357	-12.2583	-12.2891	-12.1788		-12.2583	-12.2891	-12.1788				R^2	0.997886	0.955908	0.98844			0.971528	0.984863
	1973-03-15	-11.8	-11.8		1975-03-15		-13.4	-51.3138	1961-03-15	24	Mar	17.5714	3.82939	3.82939	1976	-11.925	-8.68766	-6.27828		1976	-12.1182	-11.9424	-51.3138		1976	-9.54243	-12.15	-12.2937	-11.9424		-12.15	-12.2937	-11.9424				N data point	4	4	4			4	4
	1973-04-15	-11.5	-11.5		1975-04-15	-12.8	-12.8	-47.8207	1961-04-15	5	Apr	17.1429	3.73599	3.73599	1977		-13.3418	-13.5531		1977	-12.5445	-12.3833	-47.8207														N independent regressions	3	3	3			3	3
	1973-05-15		-11.8667		1975-05-15	-10	-10	-87.1731	1961-05-15	40	May	40	8.71731	8.71731	1978	-12.55	-12.7313	-10.7132		1978	-12.711	-12.6935	-87.1731		1978	-12.5031	-12.65	-12.8036	-12.8348		-12.65	-12.8036	-12.8348				p	0.00105758	0.0222944	0.00579656			0.0143389	0.00759719
	1973-06-15		-12.2333		1975-06-15		-8.8	-96.4384	1961-06-15	87	Jun	50.2857	10.9589	10.9589	1979	-12.725	-13.0824	-12.3595		1979	-12.811	-12.8922	-96.4384		1979	-13.161	-12.7667	-12.8757	-12.8922		-12.7667	-12.8757	-12.8922				Bonferroni alpha	0.0166667	0.0166667	0.0166667			0.0166667	0.0166667
	1973-07-15	-12.6	-12.6		1975-07-15	-7.6	-7.6	-123.512	1961-07-15	140	Jul	74.5714	16.2516	16.2516	1980	-12.525				1980	-11.9135	-12.2131	-123.512														Bonferroni p	0.00634549	0.133766	0.0347793			0.0645253	0.0341873
	1973-08-15	-10.2	-10.2		1975-08-15		-9.8	-131.806	1961-08-15	93	Aug	61.7143	13.4496	13.4496									-131.806
	1973-09-15		-11		1975-09-15	-12	-12	-140.847	1961-09-15	36	Sep	53.8571	11.7372	11.7372	Winter precipitation								-140.847														PAST p	0.0010486	0.02084	0.0056349			0.013363	0.0079036
	1973-10-15	-11.8	-11.8		1975-10-15		-13.25	-118.392	1961-10-15	76	Oct	41	8.93524	8.93524		MJ	DJF				MJ		-118.392			JJAS	JJAS	JJAS	JJAS		JJAS	JJAS	JJAS				PAST Bonferroni adj p	0.0062916	0.12504	0.0338094			0.0601335	0.0355662
	1973-11-15	-9.6	-9.6		1975-11-15	-14.5	-14.5	-106.087	1961-11-15	48	Nov	33.5714	7.31631	7.31631	1975	-13.125	-14.3			1975	-12.8392	-12.5967	-106.087		1975	-9.40131	-12.35	-12.1335	-12.1788		-12.35	-12.1335	-12.1788
	1973-12-15	-12.1	-12.1		1975-12-15	-14	-14	-95.8904	1961-12-15	28	Dec	31.4286	6.84932	6.84932	1976	-12.85	-13.7545			1976	-11.8771	-11.6675	-95.8904		1976	-8.68766	-11.925	-12.1182	-11.9424		-11.925	-12.1182	-11.9424				R	0.908045	0.992567	0.988277			0.864647	0.951851
	1974-01-15	-12.9	-12.9		1976-01-15	-14	-14	-57.5342	1962-01-15	46				4.10959	1977	-13.075	-16.3455			1977	-12.4908	-12.4406	-57.5342														R^2	0.824546	0.985189	0.976691			0.747614	0.906021
	1974-02-15		-12.5		1976-02-15	-13.1	-13.1	-53.8356	1962-02-15	32		458.857	100	4.10959	1978	-13.1	-14.0455			1978	-12.7011	-12.4795	-53.8356		1978	-12.7313	-12.55	-12.711	-12.6935		-12.55	-12.711	-12.6935				N data point	4	4	4			4	4
	1974-03-15	-12.1	-12.1		1976-03-15	-8.2	-8.2	-31.401	1962-03-15	4				3.82939	1979	-13.25	-14.6136			1979	-12.3537	-12.4756	-31.401		1979	-13.0824	-12.725	-12.811	-12.8922		-12.725	-12.811	-12.8922				N independent regressions	3	3	3			3	3
	1974-04-15	-12.8	-12.8		1976-04-15		-8.35	-31.1955	1962-04-15	25				3.73599	1980	-13.2				1980	-11.945	-12.4932	-31.1955														p	0.0919548	0.00743336	0.0117234			0.135353	0.0481488
	1974-05-15	-13.4	-13.4		1976-05-15	-8.5	-8.5	-74.0971	1962-05-15	26				8.71731									-74.0971														Bonferroni alpha	0.0166667	0.0166667	0.0166667			0.0166667	0.0166667
	1974-06-15	-12.9	-12.9		1976-06-15	-4.21	-4.21	-46.137	1962-06-15	40				10.9589	growing season		+ snow						-46.137														Bonferroni p	0.551729	0.0446002	0.0703402			0.609091	0.21667
	1974-07-15	-12.7	-12.7		1976-07-15		-6.005	-97.5906	1962-07-15	50				16.2516		May-Oct	Dec-Sep				entire yr (May-Oct)		-97.5906			DJF	MJ	MJ	MJ		MJ	MJ	MJ
	1974-08-15		-12.1333		1976-08-15	-7.8	-7.8	-104.907	1962-08-15	31				13.4496	1975	-12.2583	-10.357			1975	-12.2891	-12.1788	-104.907		1975	-14.3	-13.125	-12.8392	-12.5967		-13.125	-12.8392	-12.5967				PAST p	0.091023	0.008044	0.012365			0.13614	0.045464
	1974-09-15		-11.5667		1976-09-15	-17.6	-17.6	-206.575	1962-09-15	69				11.7372	1976	-12.15	-9.54243			1976	-12.2937	-11.9424	-206.575		1976	-13.7545	-12.85	-11.8771	-11.6675		-12.85	-11.8771	-11.6675				PAST Bonferroni adj p	0.546138	0.048264	0.07419			0.61263	0.204588
	1974-10-15	-11	-11		1976-10-15		-16.8	-150.112	1962-10-15	18				8.93524	1977		-14.0958			1977	-12.7047	-12.5114	-150.112
	1974-11-15	-12.1	-12.1		1976-11-15	-16	-16	-117.061	1962-11-15	40				7.31631	1978	-12.65	-12.5031			1978	-12.8036	-12.8348	-117.061		1978	-14.0455	-13.1	-12.7011	-12.4795		-13.1	-12.7011	-12.4795
	1974-12-15	-10.9	-10.9		1976-12-15		-16.4	-112.329	1962-12-15	44				6.84932	1979	-12.7667	-13.161			1979	-12.8757	-12.8922	-112.329		1979	-14.6136	-13.25	-12.3537	-12.4756		-13.25	-12.3537	-12.4756				R	0.947765	0.456414	0.758351			0.639968	0.892381
	1975-01-15	-11.6	-11.6		1977-01-15	-16.8	-16.8	-69.0411	1963-01-15	7				4.10959	1980	-12.5667				1980	-12.1235	-12.4371															R^2	0.898259	0.208314	0.575096			0.40956	0.796343
	1975-02-15	-13	-13		1977-02-15	-15.8	-15.8	-64.9315	1963-02-15	1				4.10959																							N data point	4	4	4			4	4
	1975-03-15	-13.1	-13.1		1977-03-15	-16.1	-16.1	-61.6532	1963-03-15	5				3.82939	Winter precipitation										averages	Racksund	Slagnas	ED-NJB-A6R	ED-NJB-A4R								N independent regressions	3	3	3			3	3
	1975-04-15	-13.2	-13.2		1977-04-15	-14	-14	-52.3039	1963-04-15	20				3.73599		AM	DJF				May				D-S, M-O	-11.3909	-12.4562	-12.5655	-12.462								p	0.0522349	0.543586	0.241649			0.360032	0.107619
	1975-05-15		-13.15		1977-05-15	-13.9	-13.9	-121.171	1963-05-15	51				8.71731	1975	-13.175	-14.3			1975	-13.2269	-12.7043			JJAS	-10.9757	-12.3875	-12.4434	-12.4267								Bonferroni alpha	0.0166667	0.0166667	0.0166667			0.0166667	0.0166667
	1975-06-15	-13.1	-13.1		1977-06-15	-13.5	-13.5	-147.945	1963-06-15	43				10.9589	1976	-12.7	-13.7545			1976	-11.938	-11.7342			DJF, MJ	-14.1784	-13.0813	-12.4428	-12.3048								Bonferroni p	0.313409	1	1			1	0.484288
	1975-07-15	-12.5	-12.5		1977-07-15	-13.3	-13.3	-216.146	1963-07-15	84				16.2516	1977	-12.25	-16.3455			1977	-12.9774	-12.4538
	1975-08-15	-12.6	-12.6		1977-08-15		-13.3	-178.879	1963-08-15	50				13.4496	1978	-13.35	-14.0455			1978	-13.1492	-12.6069															PAST p	0.048079	0.53911	0.23246			0.35698	0.10212
	1975-09-15	-11.2	-11.2		1977-09-15	-13.3	-13.3	-156.105	1963-09-15	85				11.7372	1979	-13.25	-14.6136			1979	-12.5784	-12.5558															PAST Bonferroni adj p	0.288474	1	1			1	0.45954
	1975-10-15	-11	-11		1977-10-15		-13.95	-124.647	1963-10-15	26				8.93524	1980	-13.05				1980	-13.0178	-13.074
	1975-11-15	-11.9	-11.9		1977-11-15	-14.6	-14.6	-106.818	1963-11-15	40				7.31631
	1975-12-15	-12	-12		1977-12-15		-14.85	-101.712	1963-12-15	27				6.84932
	1976-01-15	-12.2	-12.2		1978-01-15	-15.1	-15.1	-62.0548	1964-01-15	11				4.10959									-62.0548
	1976-02-15	-11.6	-11.6		1978-02-15		-11.65	-47.8767	1964-02-15	10				4.10959									-47.8767
	1976-03-15	-12.6	-12.6		1978-03-15	-8.2	-8.2	-31.401	1964-03-15	3				3.82939		-12.415	-11.4489		JJAS				-31.401
	1976-04-15	-12	-12		1978-04-15	-11	-11	-41.0959	1964-04-15	29				3.73599		-13.1	-14.6118		MJ				-41.0959
	1976-05-15	-13.4	-13.4		1978-05-15		-11	-95.8904	1964-05-15	21				8.71731		-12.4783	-11.9319		entire yr (May-Oct)				-95.8904
	1976-06-15	-12.3	-12.3		1978-06-15	-11	-11	-120.548	1964-06-15	61				10.9589		-12.9625	-14.6118		AM				-120.548
	1976-07-15	-12.3	-12.3		1978-07-15	-10.3	-10.3	-167.391	1964-07-15	71				16.2516									-167.391
	1976-08-15	-12	-12		1978-08-15	-15.1	-15.1	-203.088	1964-08-15	106				13.4496			GNIP monthly						-203.088
	1976-09-15	-11.1	-11.1		1978-09-15	-15	-15	-176.059	1964-09-15	48				11.7372			Racksund						-176.059
	1976-10-15	-11.8	-11.8		1978-10-15	-13.8	-13.8	-123.306	1964-10-15	25				8.93524			d18O						-123.306
	1976-11-15	-12.1	-12.1		1978-11-15	-16.2	-16.2	-118.524	1964-11-15	35				7.31631			1975-79, w/o 1977						-118.524
	1976-12-15	-11.9	-11.9		1978-12-15		-15.05	-103.082	1964-12-15	35				6.84932			amount-corrected						-103.082
	1977-01-15	-12.5	-12.5		1979-01-15	-13.9	-13.9	-57.1233	1965-01-15	32				4.10959		av	-12.026						-57.1233
	1977-02-15	-12.3	-12.3		1979-02-15	-14.6	-14.6	-60	1965-02-15	16				4.10959									-60
	1977-03-15	-12.7	-12.7		1979-03-15	-14.8	-14.8	-56.675	1965-03-15	37				3.82939									-56.675
	1977-04-15	-11.4	-11.4		1979-04-15	-17.6	-17.6	-65.7534	1965-04-15	15				3.73599									-65.7534
	1977-05-15	-13.1	-13.1		1979-05-15	-8.5	-8.5	-74.0971	1965-05-15	63				8.71731									-74.0971
	1977-06-15		-13.05		1979-06-15	-12.1	-12.1	-132.603	1965-06-15	43				10.9589			GNIP annual						-132.603
	1977-07-15	-13	-13		1979-07-15	-13.4	-13.4	-217.771	1965-07-15	26				16.2516			Racksund						-217.771
	1977-08-15				1979-08-15	-12	-12	-161.395	1965-08-15	57				13.4496			d18O						-161.395
	1977-09-15				1979-09-15	-14.8	-14.8	-173.711	1965-09-15	56				11.7372			1975-79, w/o 1977						-173.711
	1977-10-15				1979-10-15	-16.9	-16.9	-151.006	1965-10-15	40				8.93524			amount-corrected						-151.006
	1977-11-15				1979-11-15				1965-11-15	15				7.31631			arithm m
	1977-12-15				1979-12-15				1965-12-15	21				6.84932			-11.1681
	1978-01-15	-12.9	-12.9		1980-01-15				1966-01-15	1				4.10959			-10.8277
	1978-02-15	-12.9	-12.9		1980-02-15				1966-02-15	22				4.10959			-12.9032
	1978-03-15	-12.8	-12.8		1980-03-15				1966-03-15	29				3.82939			-13.3995
	1978-04-15	-13.3	-13.3		1980-04-15				1966-04-15	17				3.73599
	1978-05-15	-13.4	-13.4		1980-05-15				1966-05-15	52				8.71731		av	-12.0746
	1978-06-15	-12.8	-12.8		1980-06-15				1966-06-15	35				10.9589		stdev	1.26729
	1978-07-15	-12.6	-12.6		1980-07-15				1966-07-15	80				16.2516
	1978-08-15	-12.5	-12.5		1980-08-15				1966-08-15	37				13.4496
	1978-09-15	-12.3	-12.3		1980-09-15				1966-09-15	50				11.7372
	1978-10-15	-12.3	-12.3		1980-10-15				1966-10-15	28				8.93524
	1978-11-15	-12.4	-12.4		1980-11-15				1966-11-15	22				7.31631
	1978-12-15	-12.8	-12.8		1980-12-15				1966-12-15	40				6.84932
	1979-01-15	-12.9	-12.9						1967-01-15	10
	1979-02-15	-12.9	-12.9						1967-02-15	14
	1979-03-15	-13	-13						1967-03-15	21
	1979-04-15	-13.2	-13.2						1967-04-15	9
	1979-05-15	-13.3	-13.3						1967-05-15	27
	1979-06-15	-13.2	-13.2						1967-06-15	43
	1979-07-15	-12.7	-12.7						1967-07-15	71
	1979-08-15	-12.8	-12.8						1967-08-15	58
	1979-09-15	-12.2	-12.2						1967-09-15	33
	1979-10-15	-12.4	-12.4						1967-10-15	74
	1979-11-15	-12.7	-12.7						1967-11-15	35
	1979-12-15	-12.7	-12.7						1967-12-15	25
	1980-01-15	-12.9	-12.9
	1980-02-15	-13	-13
	1980-03-15	-13.2	-13.2
	1980-04-15	-12.7	-12.7
	1980-05-15	-13.4	-13.4
	1980-06-15	-13	-13
	1980-07-15	-12.7	-12.7
	1980-08-15	-12.2	-12.2
	1980-09-15	-12.2	-12.2
	1980-10-15	-11.9	-11.9
	1980-11-15	-12.4	-12.4
	1980-12-15	-12.5	-12.5

## Sheet: wNAO vs GNIR, GNIP
Fig. 8			GNIR	GNIP
	wNAO	av d18Owr*(s)	Slagnas	Racksund
1950	1.4	0.929719
1951	-1.26	-0.489221
1952	0.83	0.352107
1953	0.18	0.204874
1954	0.13	-0.561575
1955	-2.54	-1.33206
1956	-1.73	-0.749628
1957	1.52	-0.735613
1958	-1.02	-1.0024
1959	-0.37	-0.390047
1960	-1.54	0.374806
1961	1.8	0.445332
1962	-2.38	-0.811861
1963	-3.6	-0.906806
1964	-2.86	-1.50515
1965	-2.88	-0.95755
1966	-1.69	-0.53577
1967	1.28	0.271801
1968	-1.04	-0.313628
1969	-4.89	-1.02692
1970	-1.89	-0.844029
1971	-0.96	-0.600121
1972	0.34	0.255145
1973	2.52	0.277833
1974	1.23	0.165644
1975	1.63	0.249841	-12.2583	-10.357
1976	1.37	-0.238296	-12.15	-9.54243
1977	-2.14	-0.724894		-14.0958
1978	0.17	-0.160604	-12.65	-12.5031
1979	-2.25	-0.398264	-12.7667	-13.161
1980	0.56	-0.103615	-12.5667
1981	2.05	-0.168155
1982	0.8	-0.119518
1983	3.42	0.376686
1984	1.6	-0.178463
1985	-0.63	-0.0614887
1986	0.5	-0.211996
1987	-0.75	-0.98604
1988	0.72	1.11388
1989	5.08	1.10452
1990	3.96	1.39257
1991	1.03	1.42673
1992	3.28	1.36574
1993	2.67	-0.277428
1994	3.03	1.24118
1995	3.96	1.90347
1996	-3.78	-0.742884
1997	-0.2	0.623509
1998	0.72	1.71899

## Sheet: d18Owr(SGI) vs NAO
yr AD	δ18Owr(SGI)* (‰) NJB	δ18Owr(SGI)* (‰) GTB	δ18Owr(SGI)* (‰) GJ		sδ18Owr(SGI)* (‰) NJB	sδ18Owr(SGI)* (‰) GTB	sδ18Owr(SGI)* (‰) GJ			wNAO	sNAO	EA	SCAND	wNAO(EQ)	wNAO(OP)	sδ18Owr(SGI)* (‰) Norrland
1725
1726
1727
1728
1729
1730
1731
1732
1733
1734
1735
1736
1737
1738
1739
1740
1741
1742
1743
1744
1745
1746
1747
1748
1749
1750
1751
1752
1753
1754
1755
1756
1757
1758
1759
1760
1761
1762
1763
1764
1765
1766
1767
1768
1769
1770
1771
1772
1773
1774
1775
1776
1777
1778
1779
1780
1781
1782
1783
1784
1785
1786
1787
1788
1789
1790
1791
1792
1793
1794
1795
1796
1797
1798
1799
1800
1801
1802
1803
1804
1805
1806
1807
1808
1809
1810
1811
1812
1813
1814
1815
1816
1817
1818
1819			-14.2935				-0.863537									-0.863537
1820			-14.6161				-1.66601									-1.66601
1821			-14.9271				-2.43971									-2.43971
1822			-14.3155				-0.918161									-0.918161
1823			-14.8799				-2.32222									-2.32222
1824			-15.3405				-3.46821									-3.46821
1825			-14.6247				-1.68739									-1.68739
1826			-14.7214				-1.92796									-1.92796
1827			-14.5014				-1.38084									-1.38084
1828			-14.7639				-2.03377									-2.03377
1829			-14.8665				-2.28897									-2.28897
1830			-14.9296				-2.44585									-2.44585
1831			-14.8557				-2.262									-2.262
1832			-15.0945				-2.85605									-2.85605
1833			-14.852				-2.2528									-2.2528
1834			-13.6689				0.690263									0.690263
1835			-14.2196				-0.679619									-0.679619
1836			-13.4262				1.29408									1.29408
1837			-13.4324				1.27855									1.27855
1838			-13.5945				0.875438									0.875438
1839			-14.2639				-0.789871									-0.789871
1840			-13.9867				-0.100373									-0.100373
1841			-14.1877				-0.600218									-0.600218
1842			-13.8676				0.195855									0.195855
1843			-13.4799				1.16044									1.16044
1844			-14.1076				-0.400988									-0.400988
1845			-14.1045				-0.393309									-0.393309
1846			-13.874				0.180152									0.180152
1847			-13.8657				0.200595									0.200595
1848			-14.3155				-0.918298									-0.918298
1849			-13.9444				0.00483781									0.00483781
1850			-13.8445				0.253361									0.253361
1851			-13.4502				1.2343									1.2343
1852			-13.65				0.737398									0.737398
1853			-13.5673				0.943048									0.943048
1854			-13.3413				1.50519									1.50519
1855			-13.5522				0.9805									0.9805
1856			-13.8833				0.1568									0.1568
1857			-14.7095				-1.89851									-1.89851
1858			-14.4066				-1.14479									-1.14479
1859			-13.8069				0.346859									0.346859
1860			-13.3864				1.39316									1.39316
1861			-13.567				0.943734									0.943734
1862			-13.6004				0.860677									0.860677
1863			-14.1246				-0.443462									-0.443462
1864			-13.8904				0.139251			-1.02						0.139251
1865			-13.7895				0.390326			-1.24	0.9					0.390326
1866			-14.1237				-0.441211			0.54	0.2					-0.441211
1867			-14.1903				-0.606883			-1.38	0					-0.606883
1868			-13.5164				1.06955			2.81	2.8					1.06955
1869			-14.1784				-0.577084			1.7	-1.7					-0.577084
1870			-14.3035				-0.888297			-3.01	-1.3					-0.888297
1871			-14.0639				-0.292332			-1.01	-0.1					-0.292332
1872			-13.8128				0.332269			-0.76	-2.1					0.332269
1873			-14.1288				-0.453846			-0.5	2.6					-0.453846
1874			-13.7419				0.508692			2.32	0.9					0.508692
1875			-13.4181				1.31418			-1.35	0.5					1.31418
1876			-14.1268				-0.448818			0.21	3					-0.448818
1877			-13.8902				0.139721			0.05	-2.2					0.139721
1878			-13.4814				1.15669			1.46	-2.2					1.15669
1879			-13.5059				1.09588			-2.22	-1.3					1.09588
1880			-13.6836				0.653645			0.89	-1.9					0.653645
1881			-13.6147				0.825126			-3.8	1					0.825126
1882			-13.1031				2.09774			3.87	1.2					2.09774
1883			-13.294				1.62296			-0.23	-1.8					1.62296
1884			-13.2769				1.66548			1.44	-0.3					1.66548
1885			-13.4166				1.31789			0.89	-1.3					1.31789
1886			-13.4831				1.15249			-1.12	2.3					1.15249
1887			-13.4535				1.22617			0.45	-2.4					1.22617
1888			-13.3999				1.3595			-2.75	-2					1.3595
1889			-13.2568				1.71539			-0.1	0.3					1.71539
1890			-13.3681				1.4385			1.78	2					1.4385
1891			-13.5723				0.93067			-0.82	-3.3					0.93067
1892			-13.4869				1.143			-2.02	-1.1					1.143
1893			-13.5356				1.02195			-1.07	-2.8					1.02195
1894			-13.4914				1.13188			2.68	2.2					1.13188
1895			-13.3201				1.558			-3.97	-0.4					1.558
1896			-13.6476				0.743161			1.12	0.7					0.743161
1897			-13.6891				0.639991			1.09	-1.2					0.639991
1898			-13.7612				0.460721			1.02	-0.9					0.460721
1899			-13.8422				0.259037			0.03	0.5					0.259037
1900			-14.0529				-0.264948			-2.13	-0.6					-0.264948
1901			-13.8762				0.174655			-0.33	2					0.174655
1902			-14.1371				-0.47435			-1.41	-4.2					-0.47435
1903			-13.4632				1.20188			3.89	-1.9					1.20188
1904			-13.8334				0.281138			0.23	-2					0.281138
1905			-13.7541				0.478256			1.98	0.2					0.478256
1906			-13.5804				0.910324			2.06	-0.5					0.910324
1907			-13.7675				0.445013			2.06	-1					0.445013
1908			-13.9244				0.0547115			1.44	0.2					0.0547115
1909			-14.004				-0.143265			0	2.1					-0.143265
1910			-13.8774				0.171496			2.1	-0.8					0.171496
1911			-14.0266				-0.199523			0.29	-1.3					-0.199523
1912			-13.7784				0.41782			0.24	-1.1					0.41782
1913			-13.9583				-0.0297029			2.69	0.9					-0.0297029
1914			-13.7711				0.436017			1.48	1.4					0.436017
1915			-13.941				0.0132991			-0.2	-2.7					0.0132991
1916			-14.1168				-0.423921			-0.69	-1.7					-0.423921
1917			-14.2265				-0.69677			-3.8	-0.8					-0.69677
1918			-13.9123				0.0847184			-0.8	0.1					0.0847184
1919			-13.6691				0.689773			-0.8	1.6					0.689773
1920			-13.7304				0.537267			3.18	0.8					0.537267
1921			-13.5181				1.06541			1.63	-0.7					1.06541
1922			-13.9081				0.0951084			1.85	3.3					0.0951084
1923			-14.2442				-0.74089			1.73	1.7					-0.74089
1924			-14.1611				-0.534158			-1.13	1.6					-0.534158
1925			-13.7392				0.51529			2.39	2.4					0.51529
1926			-14.2013				-0.63415			0.11	-0.2					-0.63415
1927			-14.1656				-0.545329			1.72	-0.1					-0.545329
1928			-14.3008				-0.8818			0.63	-1.9					-0.8818
1929			-14.4145				-1.16446			-1.03	-0.4					-1.16446
1930			-13.9789				-0.0809562			0.91	1.4					-0.0809562
1931			-14.2238				-0.690206			-0.16	-1.1					-0.690206
1932			-14.1833				-0.589376			-0.5	0.8					-0.589376
1933			-13.6644				0.701499			0.25	3.1					0.701499
1934			-13.6948				0.625878			0.86	0.2					0.625878
1935			-14.0756				-0.321588			0.97	3.2					-0.321588
1936			-14.1111				-0.409845			-3.89	1.8					-0.409845
1937			-13.5196				1.06173			0.72	0.4					1.06173
1938			-13.6171				0.819253			1.79	2.3					0.819253
1939			-13.988				-0.103532			0.37	0.1					-0.103532
1940			-14.4548				-1.26483			-2.86	1.5					-1.26483
1941			-14.1932				-0.614144			-2.31	1					-0.614144
1942			-14.0209				-0.185515			-0.55	0.5					-0.185515
1943			-13.8425				0.258403			1.48	-0.2					0.258403
1944		-10.8935	-13.7125			2.71956	0.581691			0.61	-0.7					1.65063
1945		-11.1264	-13.8734			2.15669	0.181651			1.64	1					1.16917
1946		-11.4434	-13.8209			1.39061	0.312152			0.27	3.5					0.851382
1947	-12.3852	-11.7823	-13.8889		-0.0654869	0.571748	0.142907			-2.71	0.2					0.216389
1948	-12.1144	-11.6158	-13.9331		0.703596	0.974129	0.0330376			1.34	-0.6					0.570254
1949	-11.838	-11.6609	-14.0418		1.48882	0.865218	-0.237355			1.87	-1.9					0.705562
1950	-11.7349	-11.6882	-13.8626		1.78172	0.799159	0.208283			1.4	0.7	-0.41	-0.126667		1.4	0.929719
1951	-12.4454	-12.0878	-14.3744		-0.236422	-0.166478	-1.06476			-1.26	-0.5	-1.615	0.335	-1.26		-0.489221
1952	-11.8851	-11.8928	-14.1889		1.35499	0.304597	-0.603264			0.83	0	-0.9075	-0.5875		0.83	0.352107
1953	-11.9911	-12.1131	-14.0315		1.0541	-0.227774	-0.211705			0.18	2.8	-1.59	-0.2525		0.18	0.204874
1954	-12.4191	-12.3251	-14.2611		-0.161737	-0.73997	-0.783016			0.13	2	-1.255	0.9525		0.13	-0.561575
1955	-13.027	-12.4618	-14.3633		-1.88853	-1.07044	-1.03721			-2.54	1.2	-0.795	0.155	-2.54		-1.33206
1956	-12.4339	-12.4094	-14.3891		-0.203895	-0.943604	-1.10138			-1.73	-0.5	-1.23	0.1775	-1.73		-0.749628
1957	-12.5017	-12.4816	-14.2247		-0.396243	-1.11827	-0.692321			1.52	-2.2	-0.27	0.4525		1.52	-0.735613
1958	-12.9087	-12.2759	-14.2815		-1.55235	-0.621131	-0.833718			-1.02	-2.4	-0.965	-0.185	-1.02		-1.0024
1959	-12.7173	-11.9488	-14.0793		-1.00878	0.169335	-0.330694			-0.37	1.5	0.2775	-0.14		-0.37	-0.390047
1960	-12.3861	-11.547	-13.9255		-0.0679103	1.14045	0.0518759			-1.54	-0.6	0.3375	0.9525		-1.54	0.374806
1961	-12.2649	-11.6217	-13.9063		0.276305	0.959926	0.0997655			1.8	2.7	-0.6525	-0.005		1.8	0.445332
1962	-12.5643	-12.4172	-14.3078		-0.574056	-0.962492	-0.899036			-2.38	-0.9	-0.49	-0.46	-2.38		-0.811861
1963	-12.5231	-12.6814	-14.2125		-0.457239	-1.60112	-0.662062			-3.6	-1.9	-0.965	-0.4675	-3.6		-0.906806
1964	-12.8124	-12.8732	-14.4175		-1.27883	-2.06464	-1.17197			-2.86	-0.8	-0.065	-0.115	-2.86		-1.50515
1965	-12.6209	-12.5875	-14.2533		-0.734819	-1.37423	-0.763597			-2.88	0.5	-1.56	0.23	-2.88		-0.95755
1966	-12.4272	-12.3747	-14.1725		-0.184845	-0.859962	-0.562501			-1.69	-0.6	-0.0725	0.1675	-1.69		-0.53577
1967	-11.9012	-12.084	-14.0817		1.30942	-0.157447	-0.336568			1.28	1.1	-1.1175	0.8125		1.28	0.271801
1968	-12.4213	-12.0785	-14.1991		-0.168037	-0.144049	-0.628798			-1.04	-2.1	-1.935	-1.0225	-1.04		-0.313628
1969	-12.8449	-12.299	-14.3615		-1.37115	-0.676811	-1.0328			-4.89	0.3	-0.5875	1.12	-4.89		-1.02692
1970	-12.8636	-12.151	-14.2633		-1.42422	-0.319376	-0.788491			-1.89	-0.1	-0.6075	0.675	-1.89		-0.844029
1971	-12.6449	-12.1888	-14.1821		-0.803223	-0.410676	-0.586465			-0.96	-0.9	-0.755	0.24	-0.96		-0.600121
1972	-12.3355	-11.7731	-13.9078		0.0757118	0.593865	0.0958597			0.34	1.6	-1.0825	1.255		0.34	0.255145
1973	-12.3912	-11.6276	-13.9583		-0.0824033	0.945654	-0.0297508			2.52	1.7	0.0475	0.365	2.52		0.277833
1974	-12.641	-11.5393	-13.8941		-0.792178	1.15901	0.130101			1.23	-0.1	-0.68	0.4825		1.23	0.165644
1975	-12.4771	-11.6014	-13.9194		-0.326361	1.00885	0.0670291			1.63	-0.9	-0.415	0.37		1.63	0.249841
1976	-12.4214	-12.0704	-14.116		-0.168417	-0.124502	-0.42197			1.37	-2.1	-2.005	-0.2525		1.37	-0.238296
1977	-12.6146	-12.2688	-14.2896		-0.716945	-0.603956	-0.853781			-2.14	-1	0.69	0.81		-2.14	-0.724894
1978	-12.3234	-11.9555	-14.2458		0.11006	0.153078	-0.74495			0.17	-1.4	0.3775	0.415	0.17		-0.160604
1979	-12.5687	-12.1863	-14.0281		-0.586808	-0.404559	-0.203425			-2.25	0.6	0.215	0.31		-2.25	-0.398264
1980	-12.338	-12.1882	-13.9344		0.0684829	-0.409071	0.0297431			0.56	-1.1	-0.0225	0.72		0.56	-0.103615
1981	-12.2876	-12.3041	-13.9572		0.211861	-0.689338	-0.0269899			2.05	-0.1	-0.795	-0.635		2.05	-0.168155
1982	-12.2708	-12.375	-13.8489		0.259472	-0.860619	0.242593			0.8	-0.8	-0.05	0.0525		0.8	-0.119518
1983	-12.0769	-12.1789	-13.6624		0.810279	-0.386763	0.706543			3.42	0.9	-0.54	-0.415		3.42	0.376686
1984	-12.3647	-12.2917	-13.8937		-0.00713434	-0.659247	0.130992			1.6	-0.3	-0.4	0.11		1.6	-0.178463
1985	-12.4891	-12.1495	-13.7487		-0.360594	-0.315721	0.491849			-0.63	-0.3	-0.665	1.03	-0.63		-0.0614887
1986	-12.5215	-12.3098	-13.7375		-0.452528	-0.703044	0.519583			0.5	-1.2	-0.23	0.5775		0.5	-0.211996
1987	-12.9296	-12.5672	-13.9549		-1.6117	-1.32509	-0.0213314			-0.75	-2.3	0.11	0.295		-0.75	-0.98604
1988	-12.0789	-11.5896	-13.3435		0.804576	1.03736	1.4997			0.72	1.4	0.3775	0.1075	0.72		1.11388
1989	-11.8084	-11.6312	-13.6233		1.57304	0.936824	0.803689			5.08	0.3	-0.22	-1.0125		5.08	1.10452
1990	-11.6322	-11.6031	-13.5044		2.07351	1.00477	1.09942			3.96	1	1.1175	-1.2675	3.96		1.39257
1991	-11.6534	-11.5846	-13.457		2.0132	1.04955	1.21745			1.03	-0.3	0.2475	0.6225	1.03		1.42673
1992	-11.7588		-13.5372		1.7137		1.01778			3.28	1	-0.5275	0.0925		3.28	1.36574
1993			-14.0579				-0.277428			2.67	-0.4	-0.3175	-0.3775		2.67	-0.277428
1994			-13.4474				1.24118			3.03	1.2	0.49	0.0625	3.03		1.24118
1995			-13.1812				1.90347			3.96	-2.1	-0.0925	-0.285		3.96	1.90347
1996			-14.245				-0.742884			-3.78	1.2	-0.4325	0.975	-3.78		-0.742884
1997			-13.6957				0.623509			-0.2	-0.9	-0.08	-0.58	-0.2		0.623509
1998			-13.2554				1.71899			0.72	0.3	0.925	0.1475	0.72		1.71899
1999
										normal distribution? [Kolmogorov–Smirnov test]
										all normally distributed!
										--> Spearman Rank correlation not needed
										--> nonparametric correlation not needed
